# Supplementary material for: Synthesis and Structure of Nido-Carboranyl Azide and Its “Click” Reactions
Source: MDPI journal article supplement (doi:10.3390/molecules26030530), 2021-01-20
Supplement: s1 [file s1]

## SUPPORTING INFORMATION

### Synthesis and structure of *nido*-carboranyl azide and its “click” reactions

Anna A. Druzina,\* Olga B. Zhidkova, Nadezhda V. Dudarova, Irina D. Kosenko, Ivan V. Ananyev, Sergey V. Timofeev and Vladimir I. Bregadze

A.N. Nesmeyanov Institute of Organoelement Compounds, Russian Academy of Sciences, 28 Vavilov Str., 119991 Moscow, Russia; [Zolga57@mail.ru](mailto:Zolga57@mail.ru) (O.B.Z.); [nadezjdino\\_96@mail.ru](mailto:nadezjdino_96@mail.ru) (N.V.D.); [kosenko@ineos.ac.ru](mailto:kosenko@ineos.ac.ru) (I.D.K.); [i.ananyev@gmail.com](mailto:i.ananyev@gmail.com) (I.V.A.); [timofeev@ineos.ac.ru](mailto:timofeev@ineos.ac.ru) (S.V.T.); [bre@ineos.ac.ru](mailto:bre@ineos.ac.ru) (V.I.B).

\* Correspondence: [ilinova\\_anna@mail.ru](mailto:ilinova_anna@mail.ru); Tel.: +7-926-404-5566 (A.A.D.)

<sup>1</sup>H, <sup>11</sup>B and <sup>13</sup>C NMR, IR and high-resolution mass spectra of compounds **2,3,5,10-12**

# Display Report

## Analysis Info

Analysis Name D:\Data\Chizhov\INEOS\Laskova\da-030\_&clblow.d  
Method tune\_low\_1550.m  
Sample Name /CHIZ DA-030  
Comment CH3CN 100 %, dil. 20, calibrant added

Acquisition Date 29.09.2020 13:58:17

Operator BDAL@DE  
Instrument maXis 43

## Acquisition Parameter

|             |            |                       |           |                  |           |
|-------------|------------|-----------------------|-----------|------------------|-----------|
| Source Type | ESI        | Ion Polarity          | Positive  | Set Nebulizer    | 0.4 Bar   |
| Focus       | Not active | Set Capillary         | 4500 V    | Set Dry Heater   | 180 °C    |
| Scan Begin  | 50 m/z     | Set End Plate Offset  | -500 V    | Set Dry Gas      | 4.0 l/min |
| Scan End    | 1550 m/z   | Set Collision Cell RF | 300.0 Vpp | Set Divert Valve | Source    |

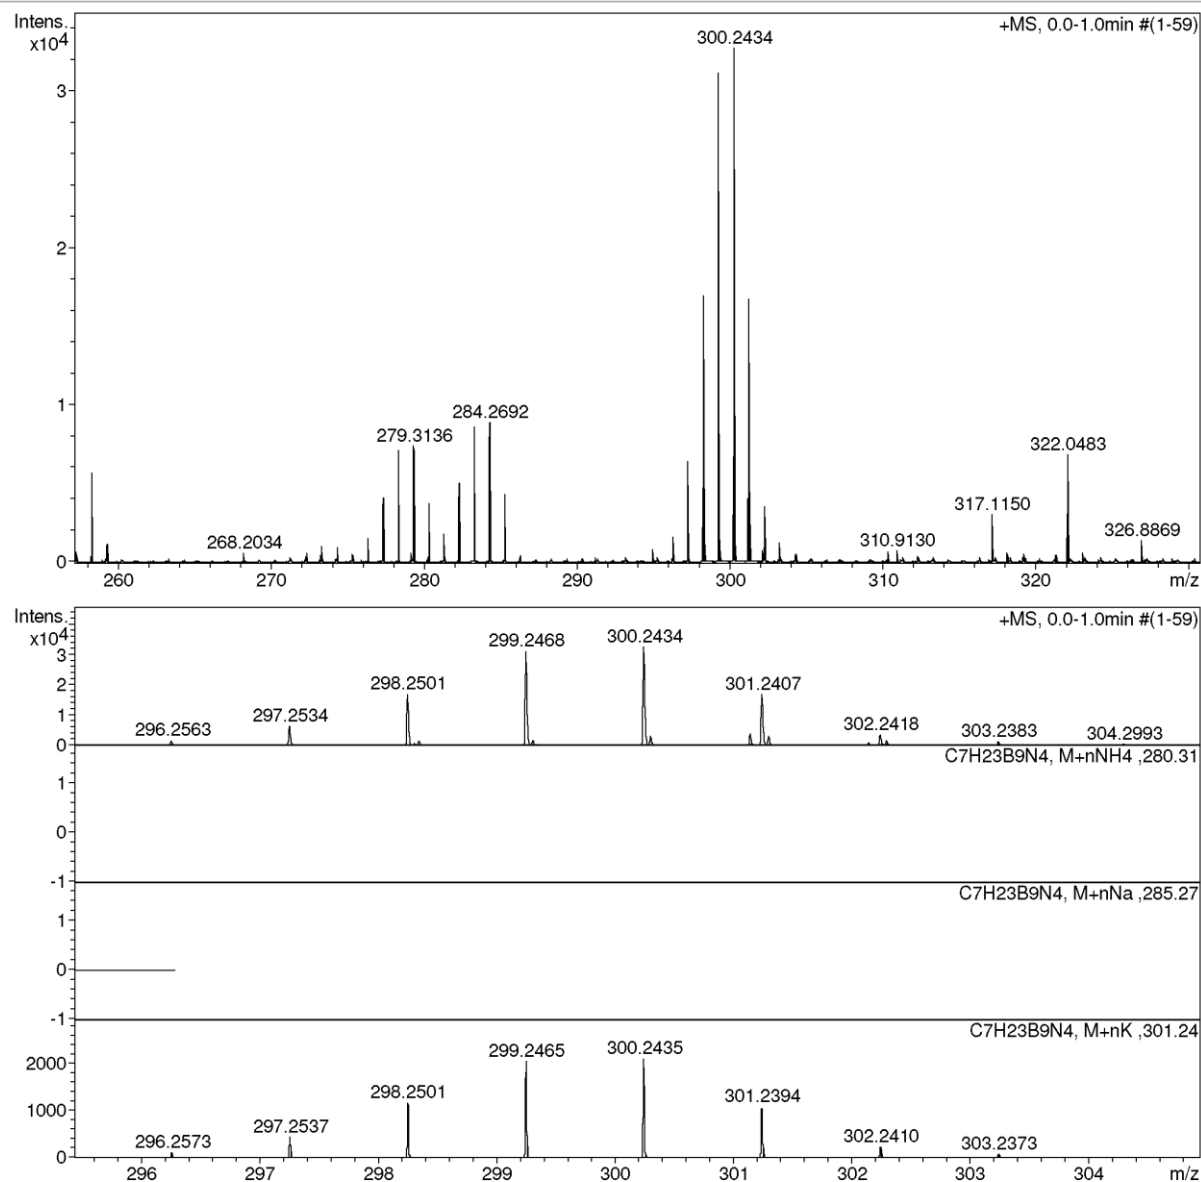

Figure S1. ESI-HRMS spectrum of compound 2

# Display Report

## Analysis Info

Analysis Name D:\Data\Chizhov\INEOS\Laskova\da-035\_&clb.d  
Method tune\_wide.m  
Sample Name /CHIZ DA-035  
Comment CH3CN !00 %, dil. 200, calibrant added

Acquisition Date 29.09.2020 14:26:58

Operator BDAL@DE  
Instrument maXis 43

## Acquisition Parameter

|             |          |                       |            |                  |           |
|-------------|----------|-----------------------|------------|------------------|-----------|
| Source Type | ESI      | Ion Polarity          | Positive   | Set Nebulizer    | 0.5 Bar   |
| Focus       | Active   | Set Capillary         | 4500 V     | Set Dry Heater   | 180 °C    |
| Scan Begin  | 50 m/z   | Set End Plate Offset  | -500 V     | Set Dry Gas      | 4.0 l/min |
| Scan End    | 3000 m/z | Set Collision Cell RF | 1200.0 Vpp | Set Divert Valve | Waste     |

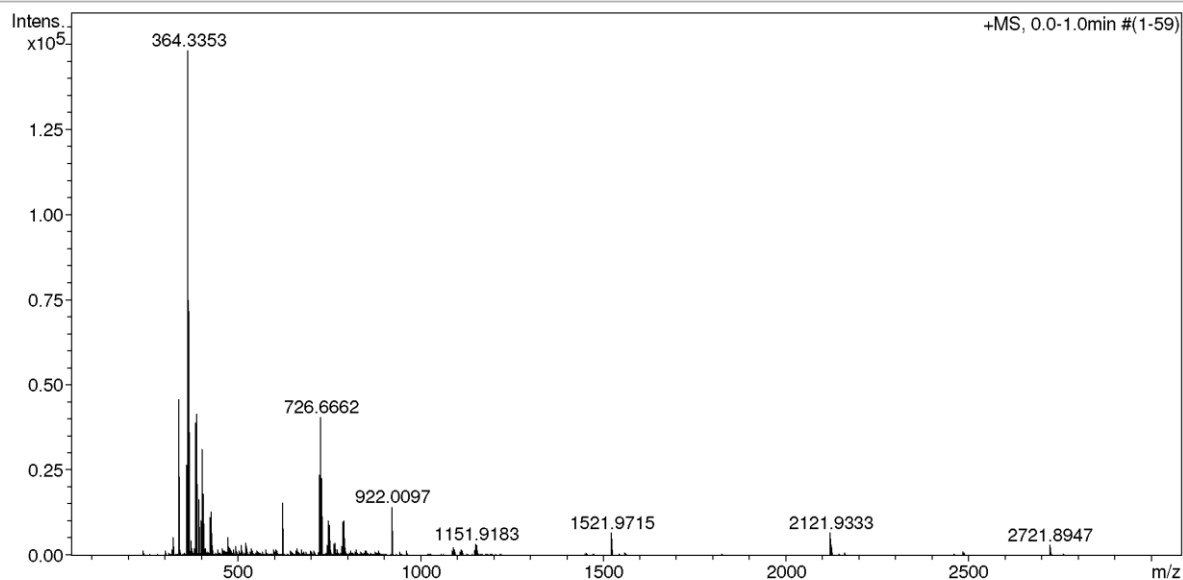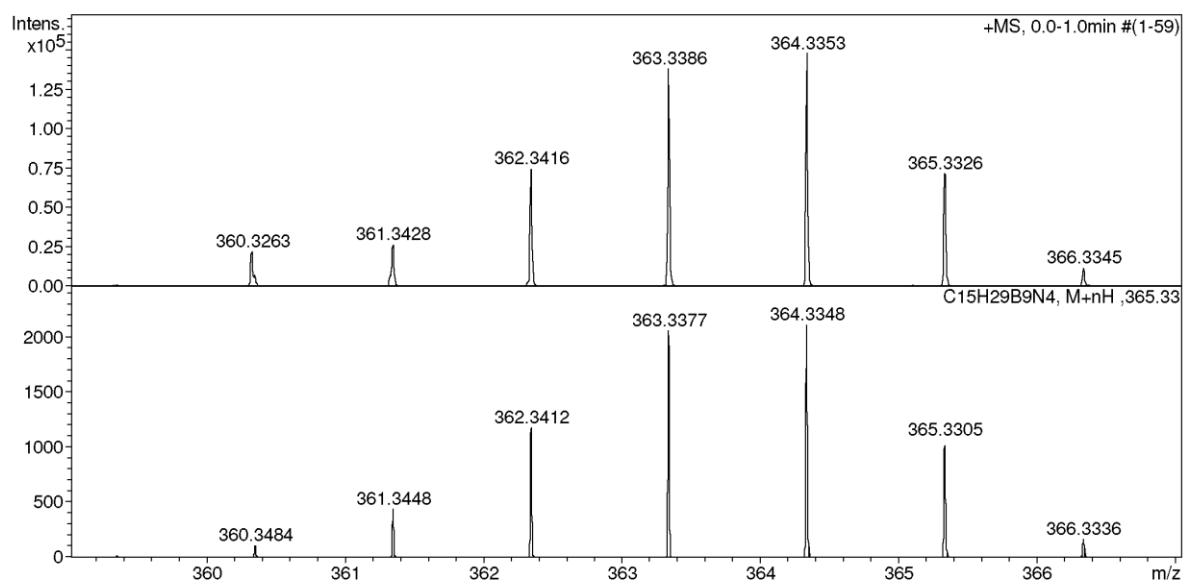

C<sub>15</sub>H<sub>29</sub>B<sub>9</sub>N<sub>4</sub>, M+nH, 365.33

Figure S2. ESI-HRMS spectrum of compound 3

## Display Report

### Analysis Info

Analysis Name D:\Data\Chizhov\INEOS\Laskova\da-037\_&clb.d  
Method tune\_wide.m  
Sample Name /CHIZ DA-037  
Comment CH3CN 100 %, dil. 200, calibrant added

Acquisition Date 29.09.2020 14:35:42

Operator BDAL@DE  
Instrument maXis 43

### Acquisition Parameter

|             |          |                       |            |                  |           |
|-------------|----------|-----------------------|------------|------------------|-----------|
| Source Type | ESI      | Ion Polarity          | Positive   | Set Nebulizer    | 0.5 Bar   |
| Focus       | Active   | Set Capillary         | 4500 V     | Set Dry Heater   | 180 °C    |
| Scan Begin  | 50 m/z   | Set End Plate Offset  | -500 V     | Set Dry Gas      | 4.0 l/min |
| Scan End    | 3000 m/z | Set Collision Cell RF | 1200.0 Vpp | Set Divert Valve | Waste     |

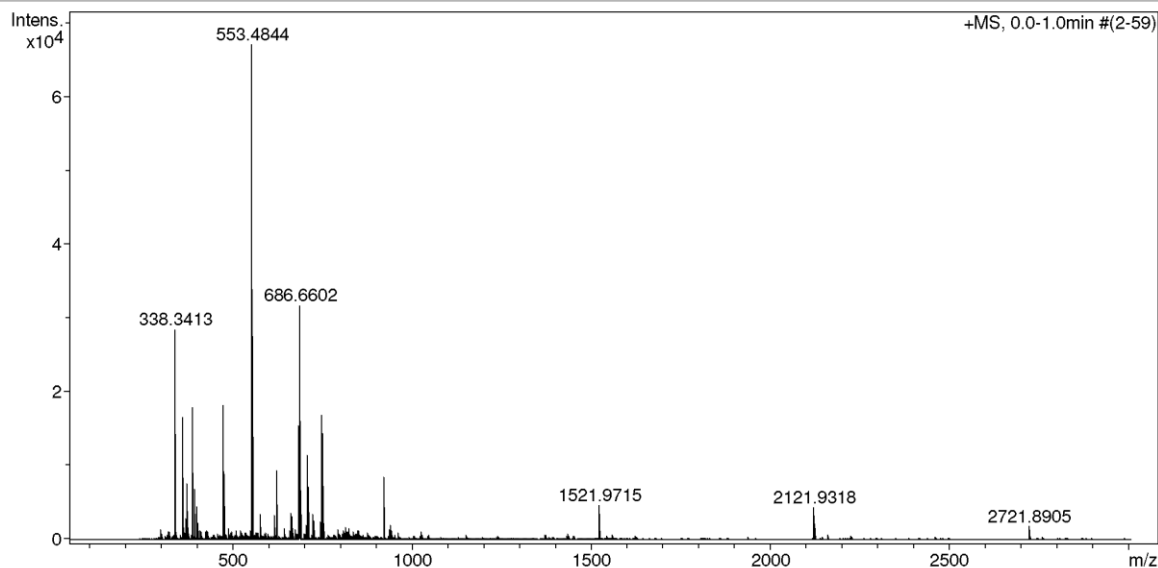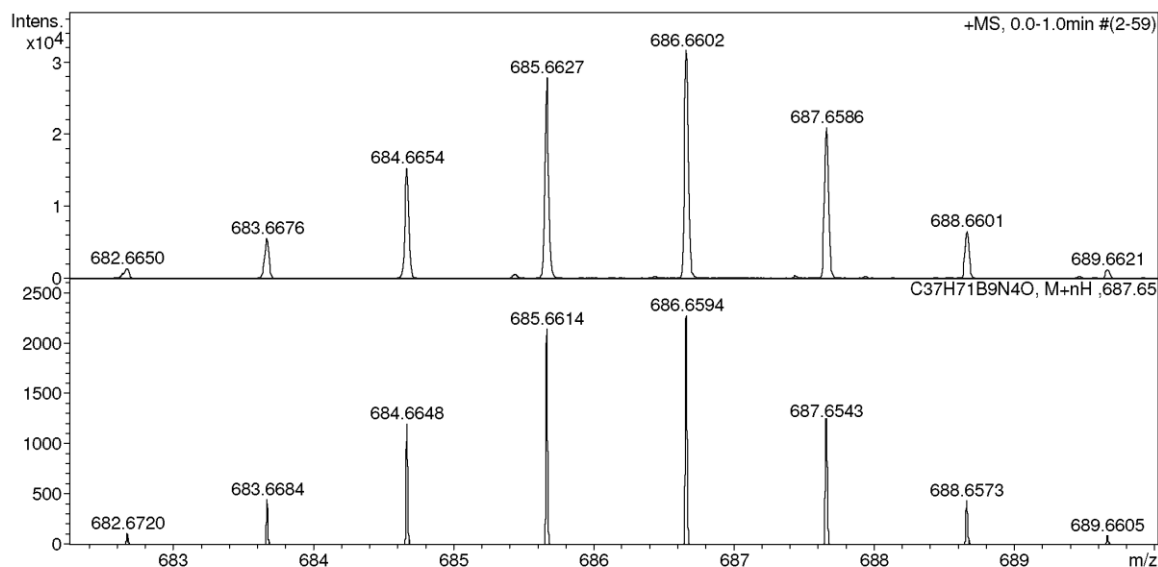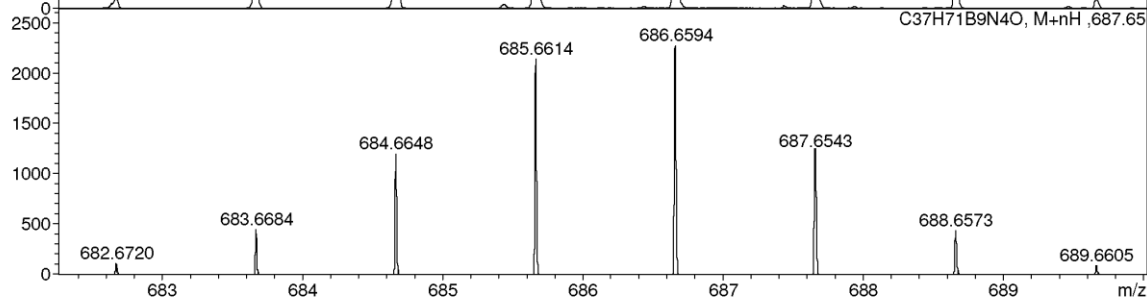

Figure S3. ESI-HRMS spectrum of compound 5

# Display Report

## Analysis Info

Analysis Name D:\Data\Chizhov\INEOS\Laskova\da-032\_&clb.d  
Method tune\_wide.m  
Sample Name /CHIZ DA-032  
Comment CH3CN 100 %, dil. 20, calibrant added

Acquisition Date 29.09.2020 14:11:16

Operator BDAL@DE  
Instrument maXis 43

## Acquisition Parameter

|             |          |                       |            |                  |           |
|-------------|----------|-----------------------|------------|------------------|-----------|
| Source Type | ESI      | Ion Polarity          | Positive   | Set Nebulizer    | 0.5 Bar   |
| Focus       | Active   | Set Capillary         | 4500 V     | Set Dry Heater   | 180 °C    |
| Scan Begin  | 50 m/z   | Set End Plate Offset  | -500 V     | Set Dry Gas      | 4.0 l/min |
| Scan End    | 3000 m/z | Set Collision Cell RF | 1200.0 Vpp | Set Divert Valve | Waste     |

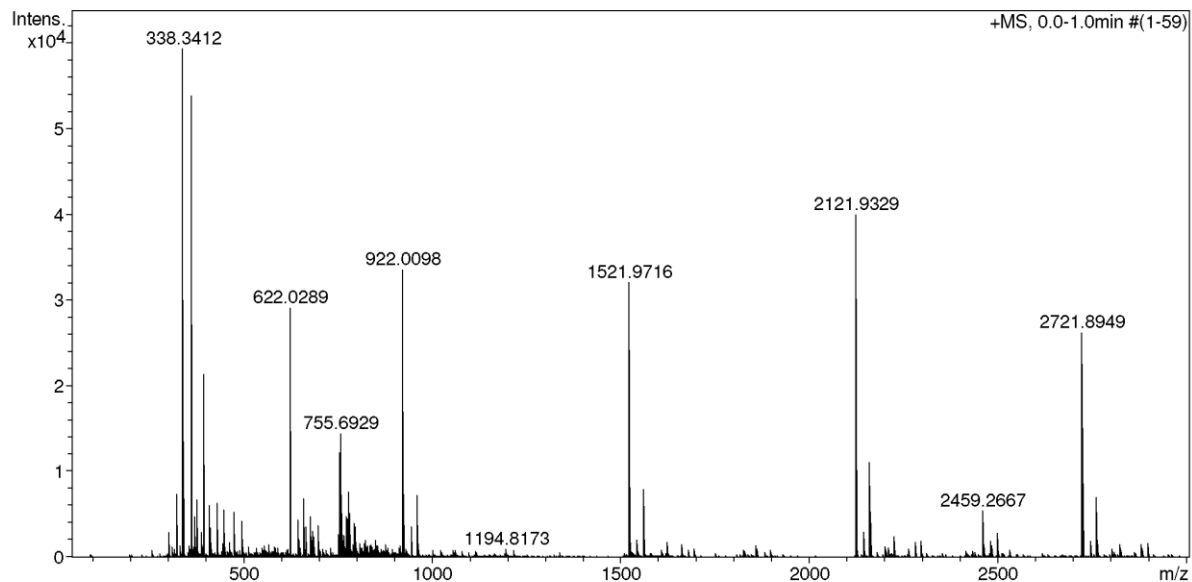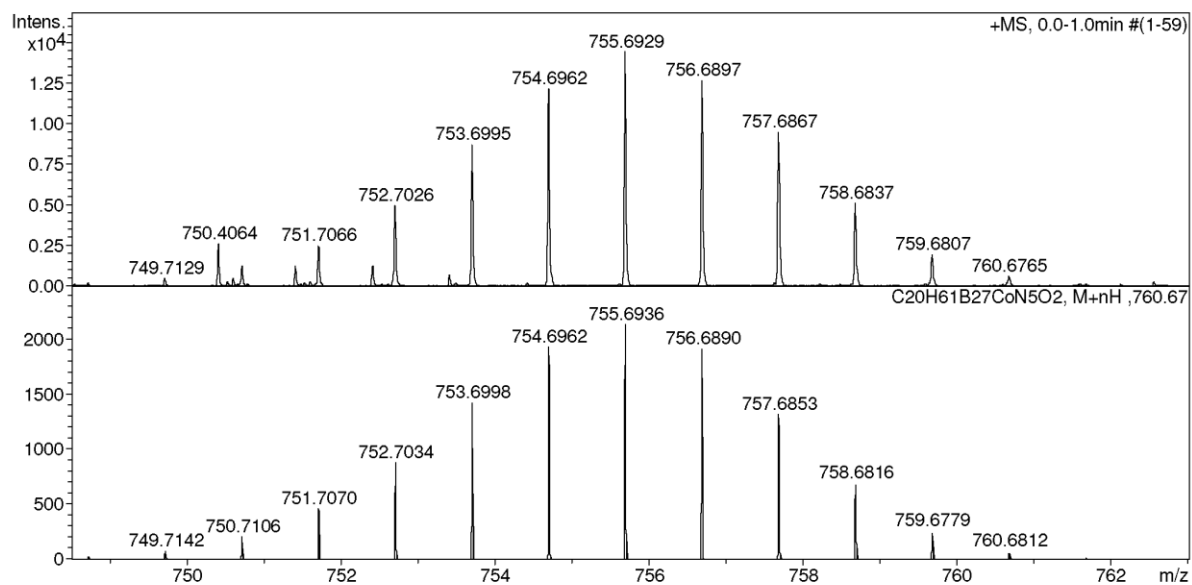

Figure S4. ESI-HRMS spectrum of compound 10

# Display Report

## Analysis Info

Analysis Name D:\Data\Chizhov\INEOS\Laskova\da-033\_&clb.d  
Method tune\_wide.m  
Sample Name /CHIZ DA-033  
Comment CH3CN !00 %, dil. 20, calibrant added

Acquisition Date 29.09.2020 14:15:00

Operator BDAL@DE  
Instrument maXis 43

## Acquisition Parameter

|             |          |                       |            |                  |           |
|-------------|----------|-----------------------|------------|------------------|-----------|
| Source Type | ESI      | Ion Polarity          | Positive   | Set Nebulizer    | 0.5 Bar   |
| Focus       | Active   | Set Capillary         | 4500 V     | Set Dry Heater   | 180 °C    |
| Scan Begin  | 50 m/z   | Set End Plate Offset  | -500 V     | Set Dry Gas      | 4.0 l/min |
| Scan End    | 3000 m/z | Set Collision Cell RF | 1200.0 Vpp | Set Divert Valve | Waste     |

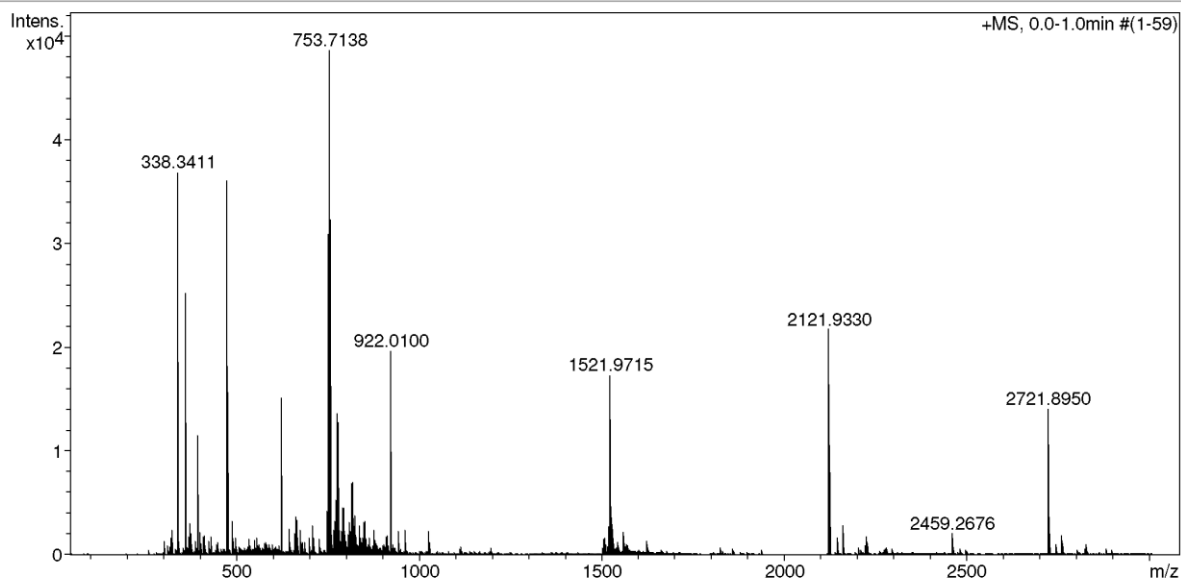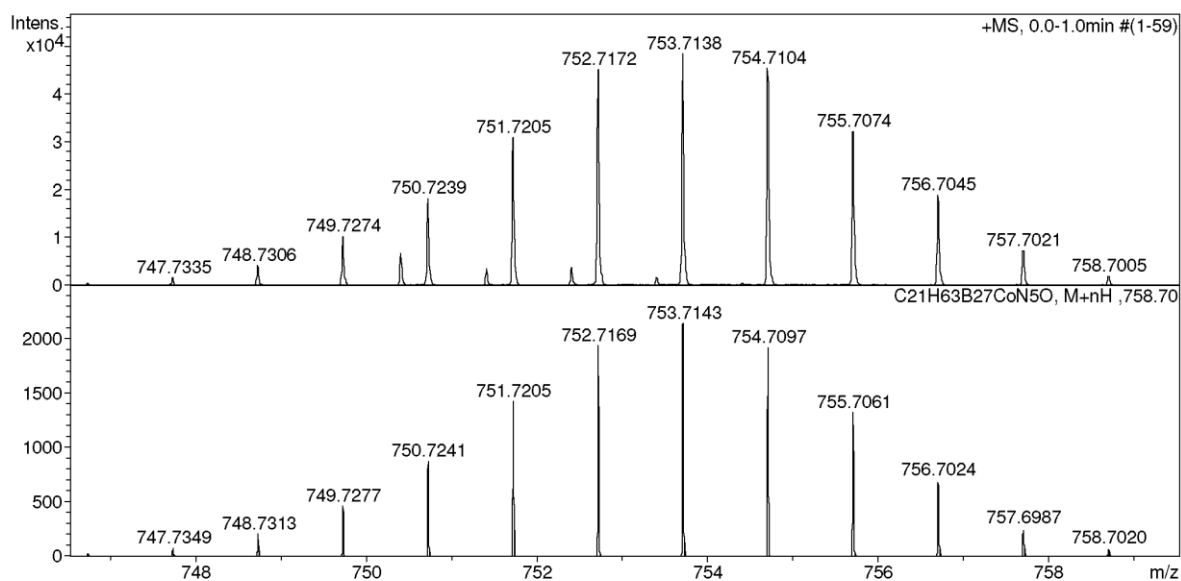

Figure S5. ESI-HRMS spectrum of compound 11

## Display Report

### Analysis Info

Analysis Name D:\Data\Chizhov\INEOS\Laskova\da-034\_&clb.d  
Method tune\_wide.m  
Sample Name /CHIZ DA-034  
Comment CH3CN 100 %, dil. 20, calibrant added

Acquisition Date 29.09.2020 14:22:18

Operator BDAL@DE  
Instrument maXis 43

### Acquisition Parameter

|             |          |                       |            |                  |           |
|-------------|----------|-----------------------|------------|------------------|-----------|
| Source Type | ESI      | Ion Polarity          | Positive   | Set Nebulizer    | 0.5 Bar   |
| Focus       | Active   | Set Capillary         | 4500 V     | Set Dry Heater   | 180 °C    |
| Scan Begin  | 50 m/z   | Set End Plate Offset  | -500 V     | Set Dry Gas      | 4.0 l/min |
| Scan End    | 3000 m/z | Set Collision Cell RF | 1200.0 Vpp | Set Divert Valve | Waste     |

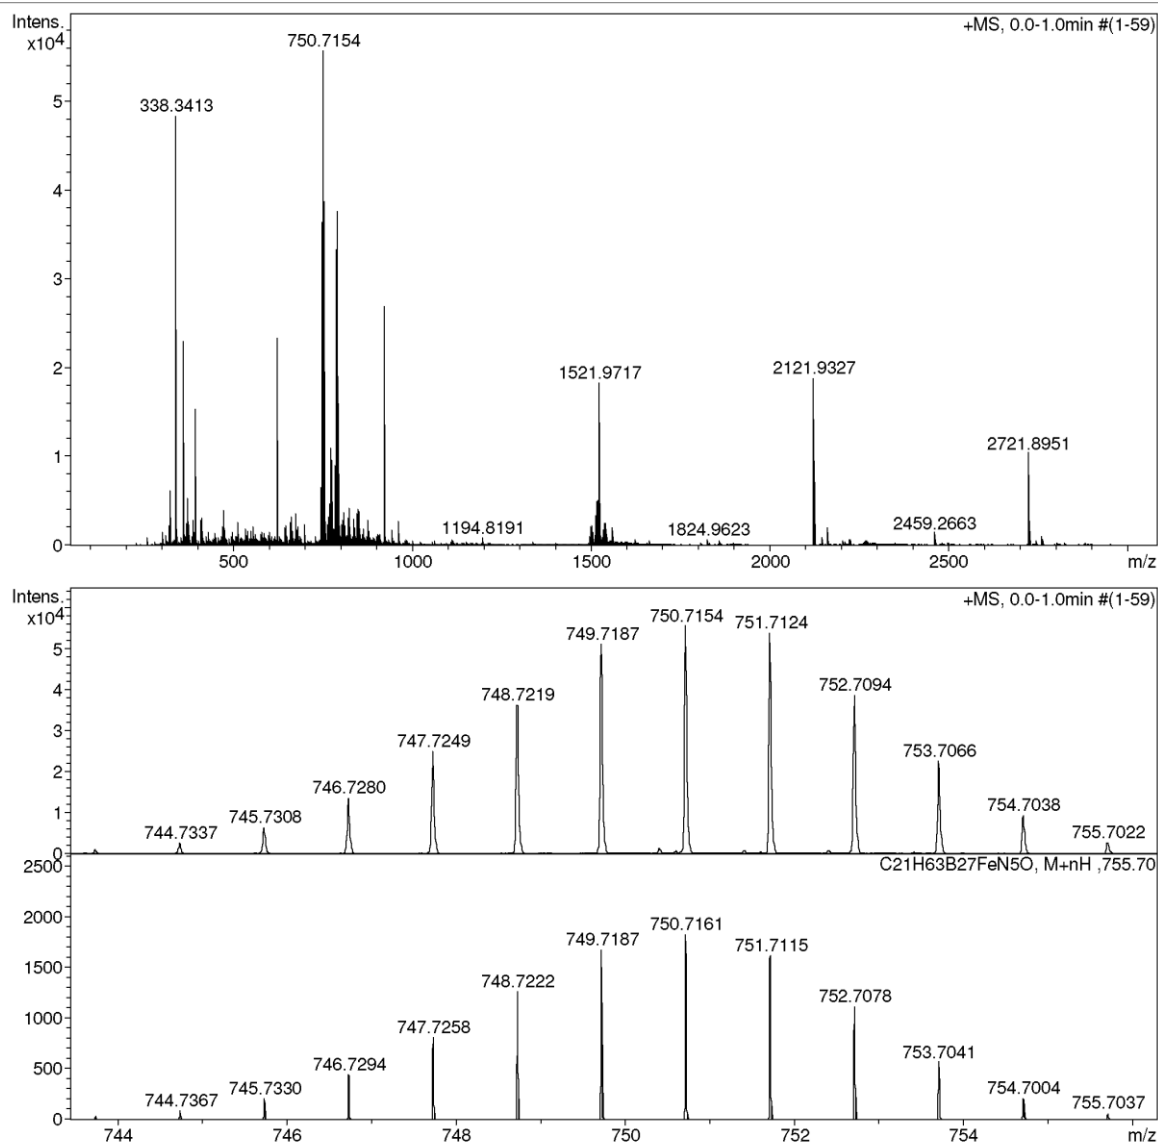

Figure S6. ESI-HRMS spectrum of compound 12

## Compound 2

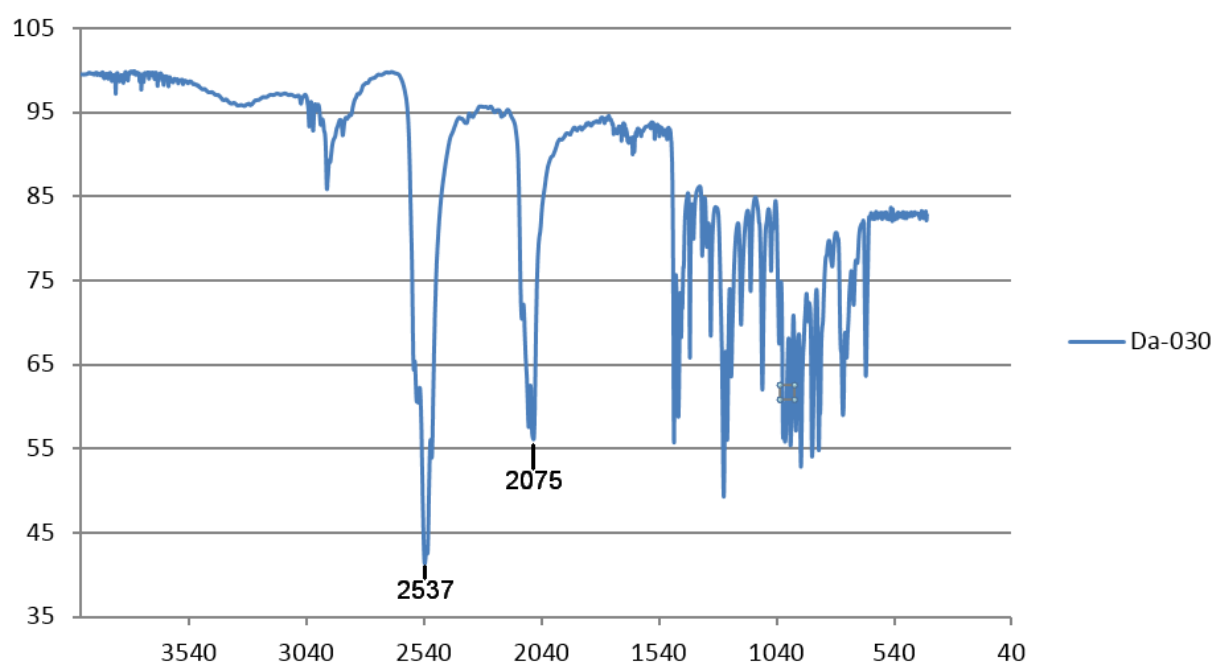

Figure S7. IR spectrum of compound 2

## Compound 3

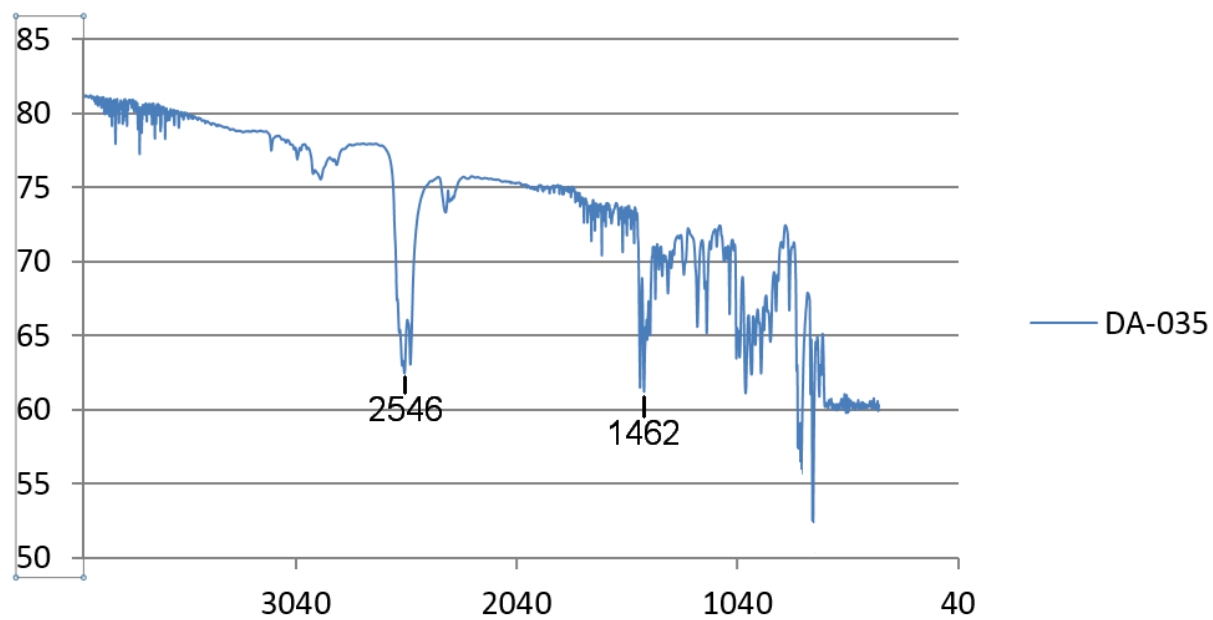

Figure S8. IR spectrum of compound 3



## Compound 5

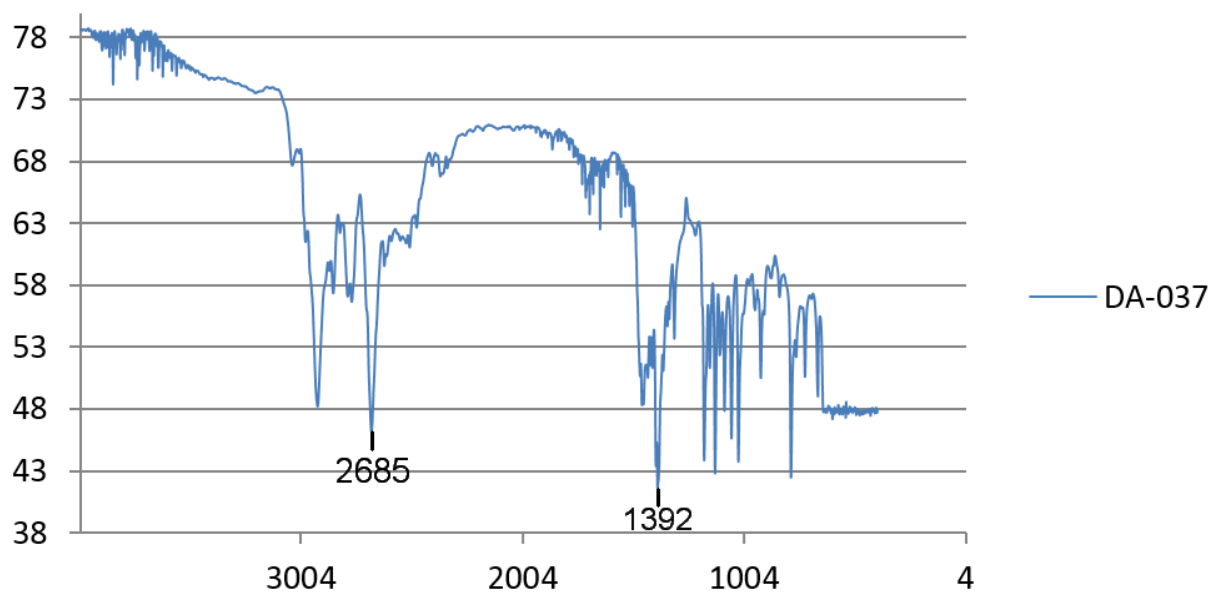

Figure S9. IR spectrum of compound 5

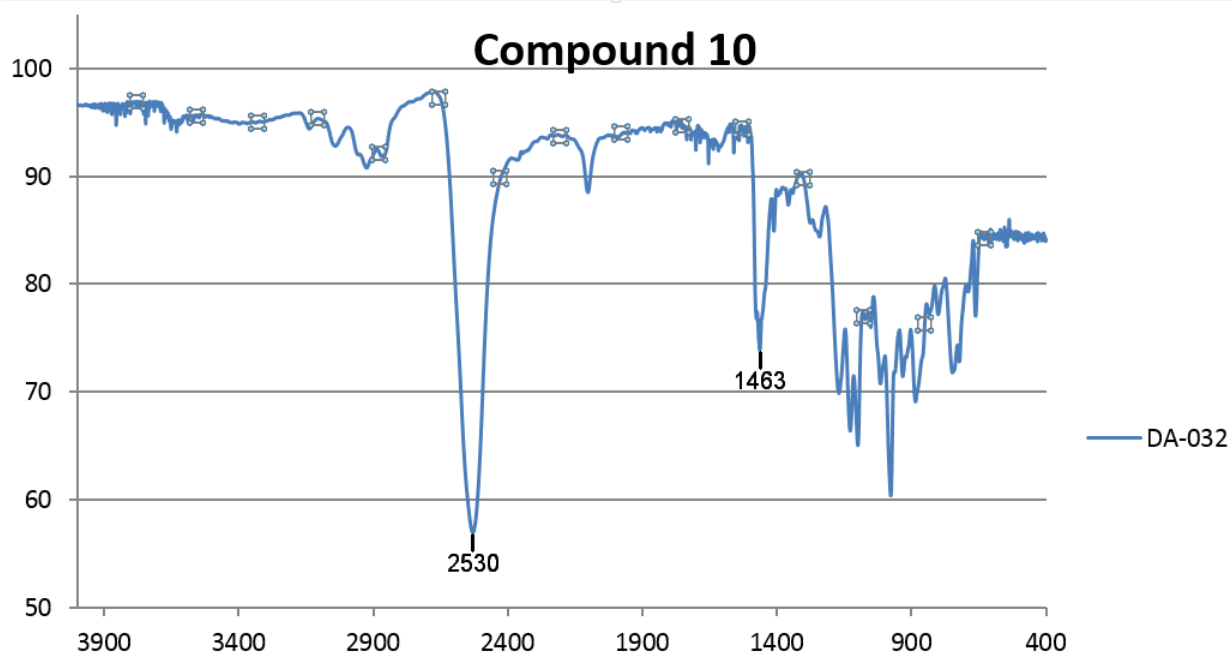

Figure S10. IR spectrum of compound 10

## Compound 11

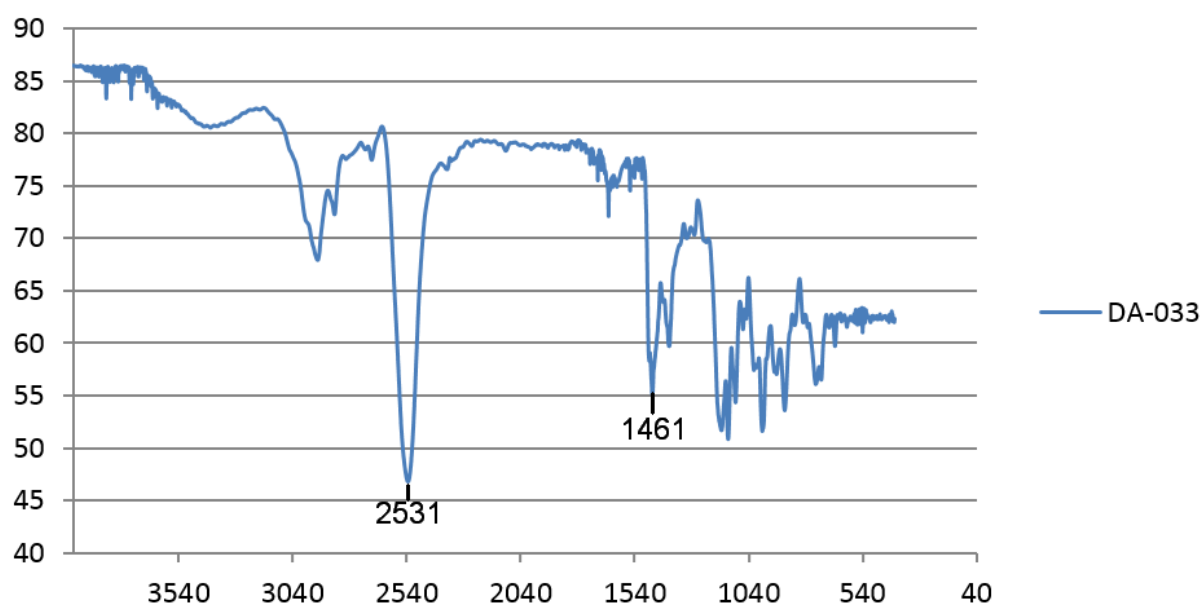

Figure S11. IR spectrum of compound 11

## Compound 12

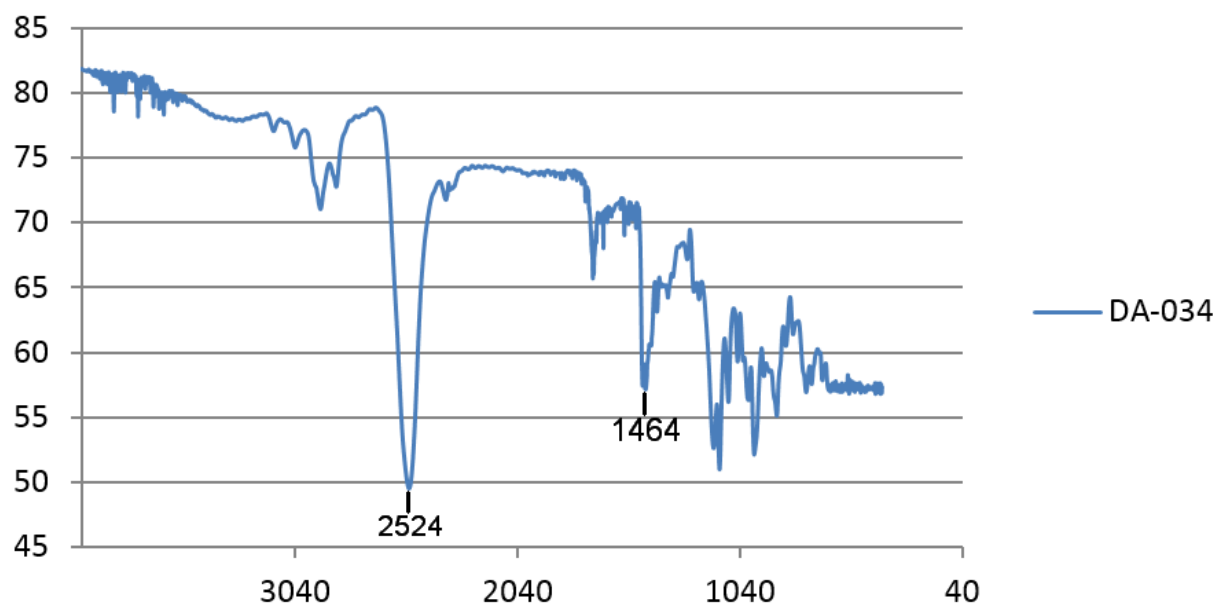

Figure S12. IR spectrum of compound 12

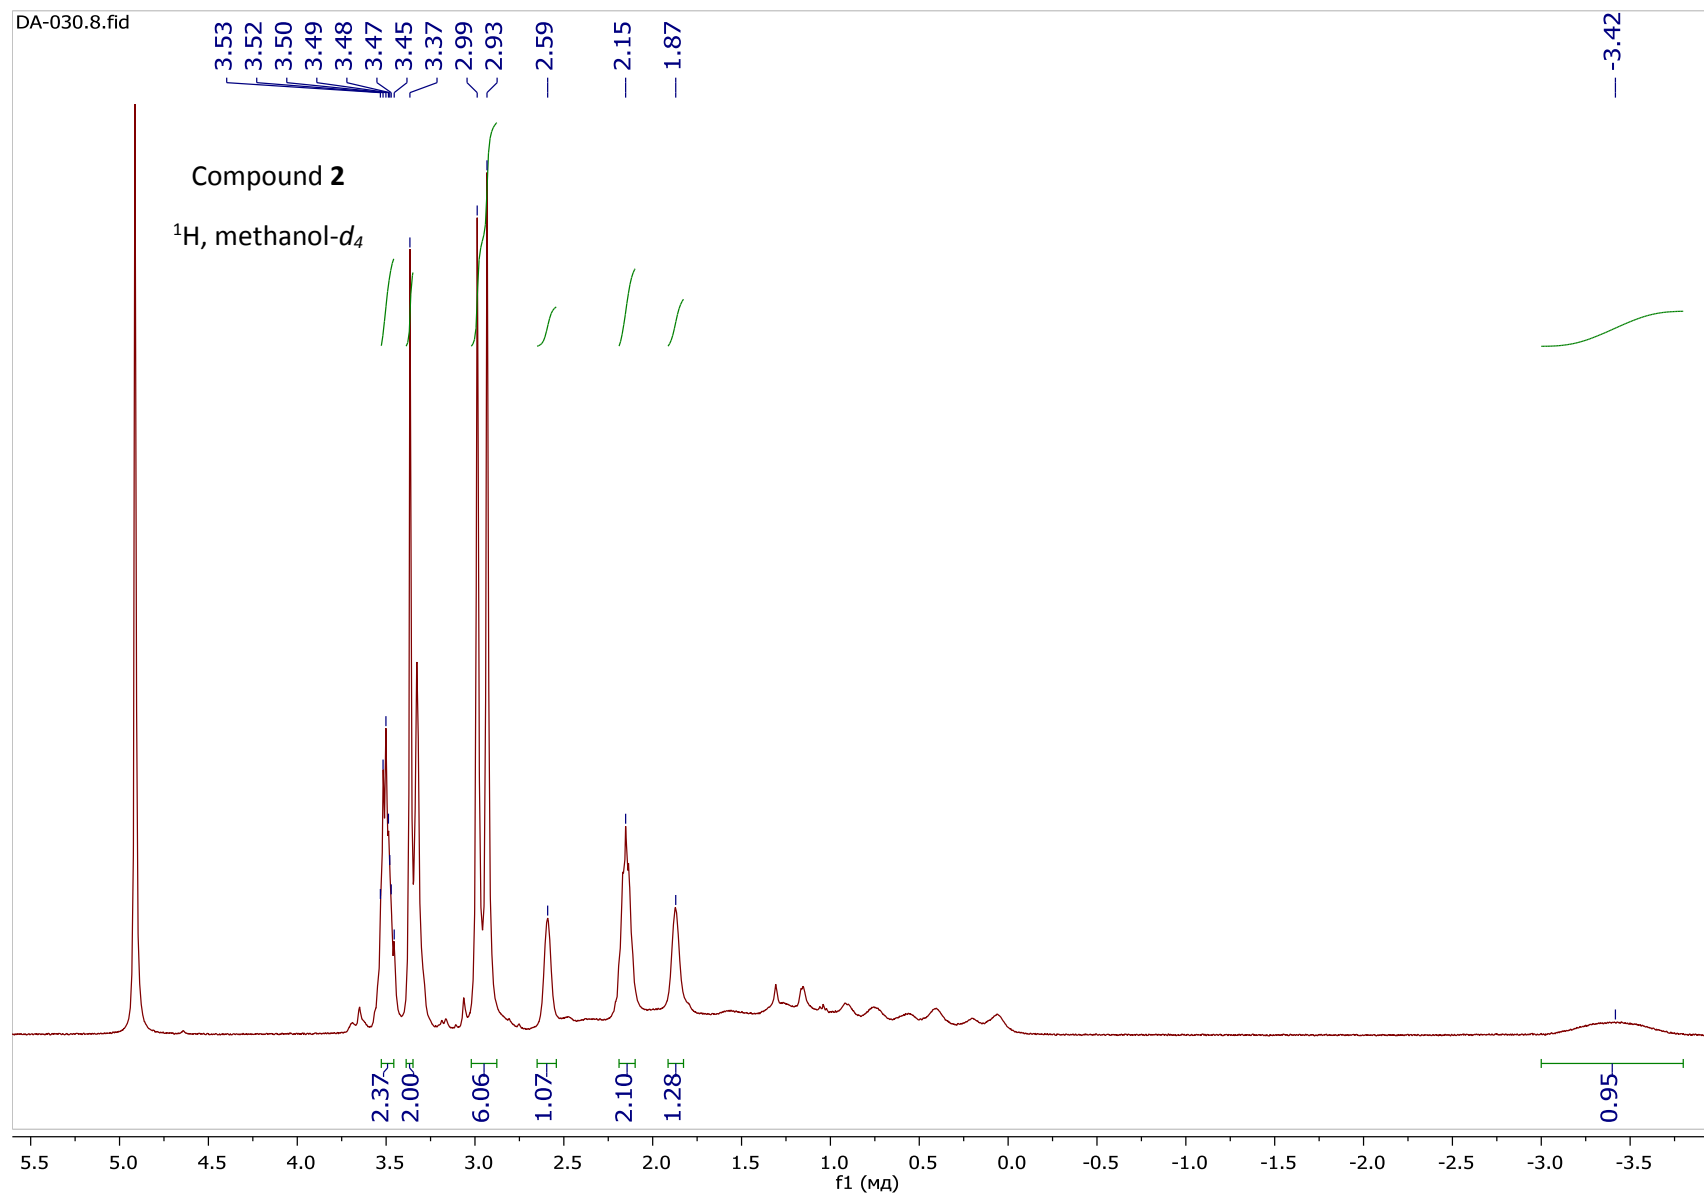

Figure S13.  $^1\text{H}$  NMR spectrum of compound **2**

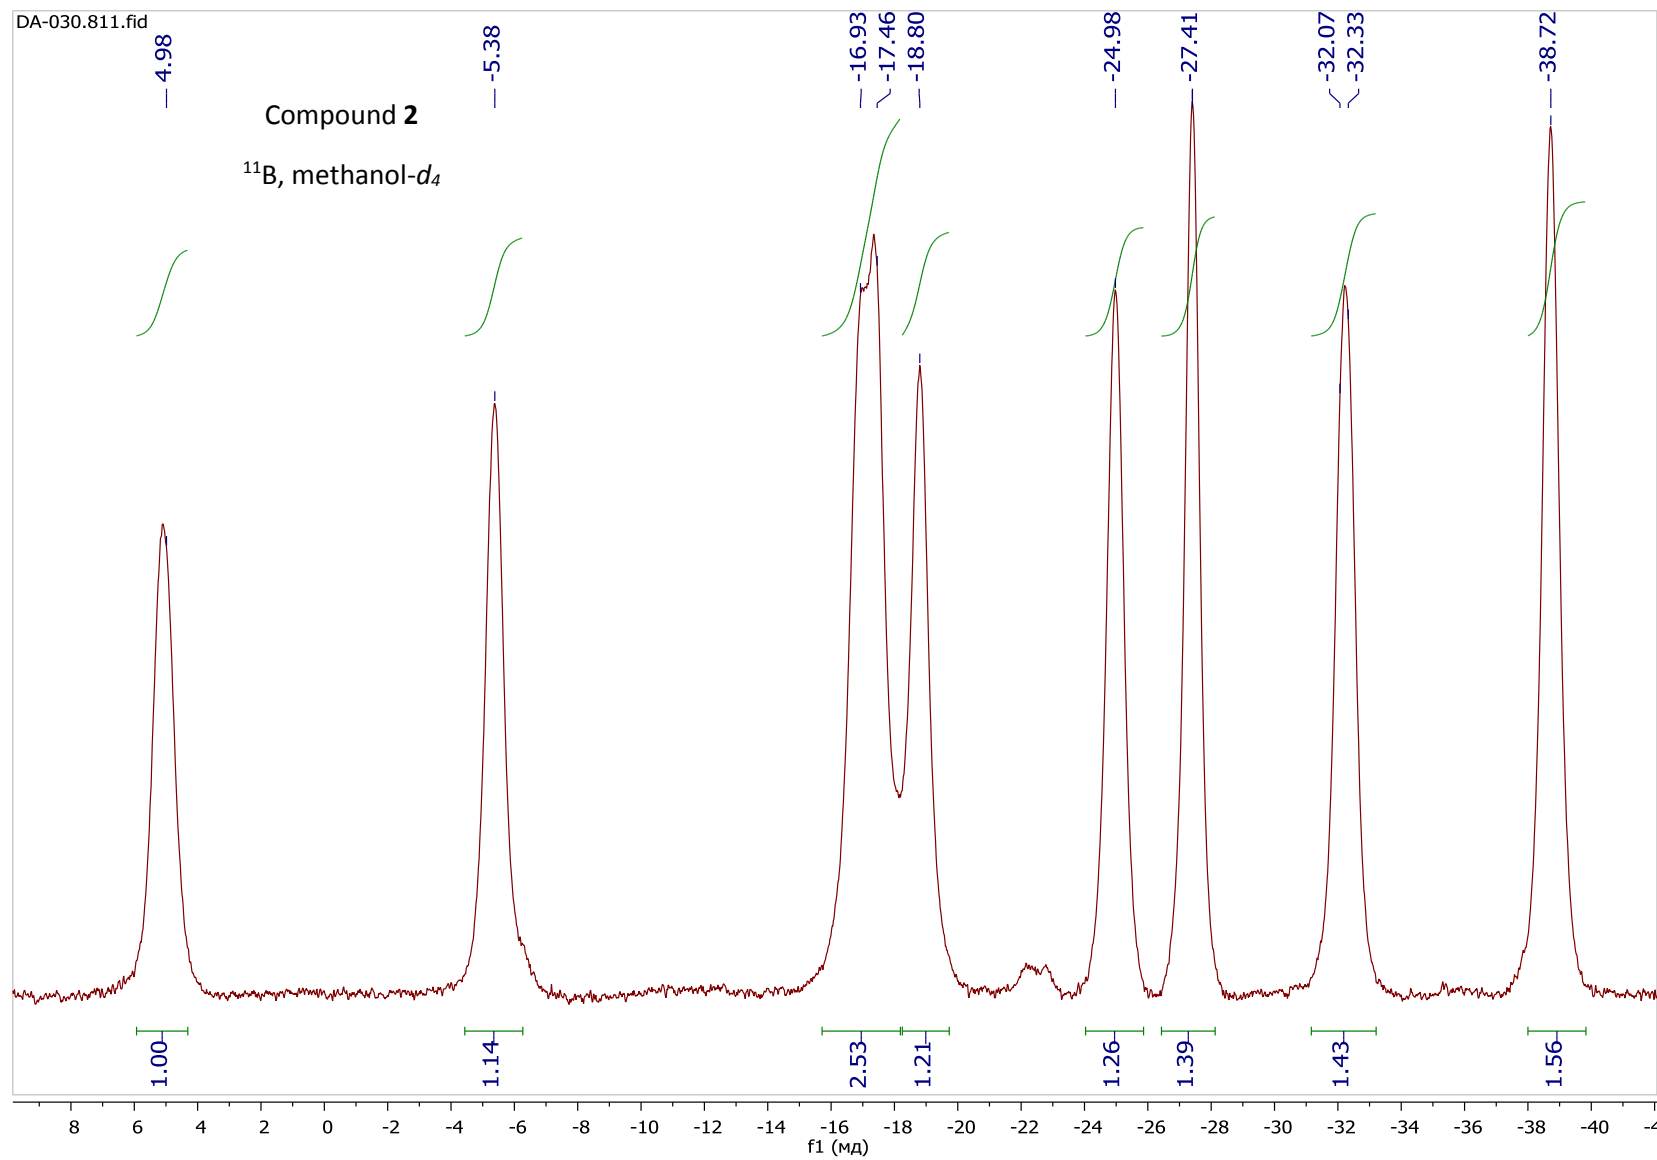

Figure S14.  $^{11}\text{B}$  NMR spectrum of compound 2

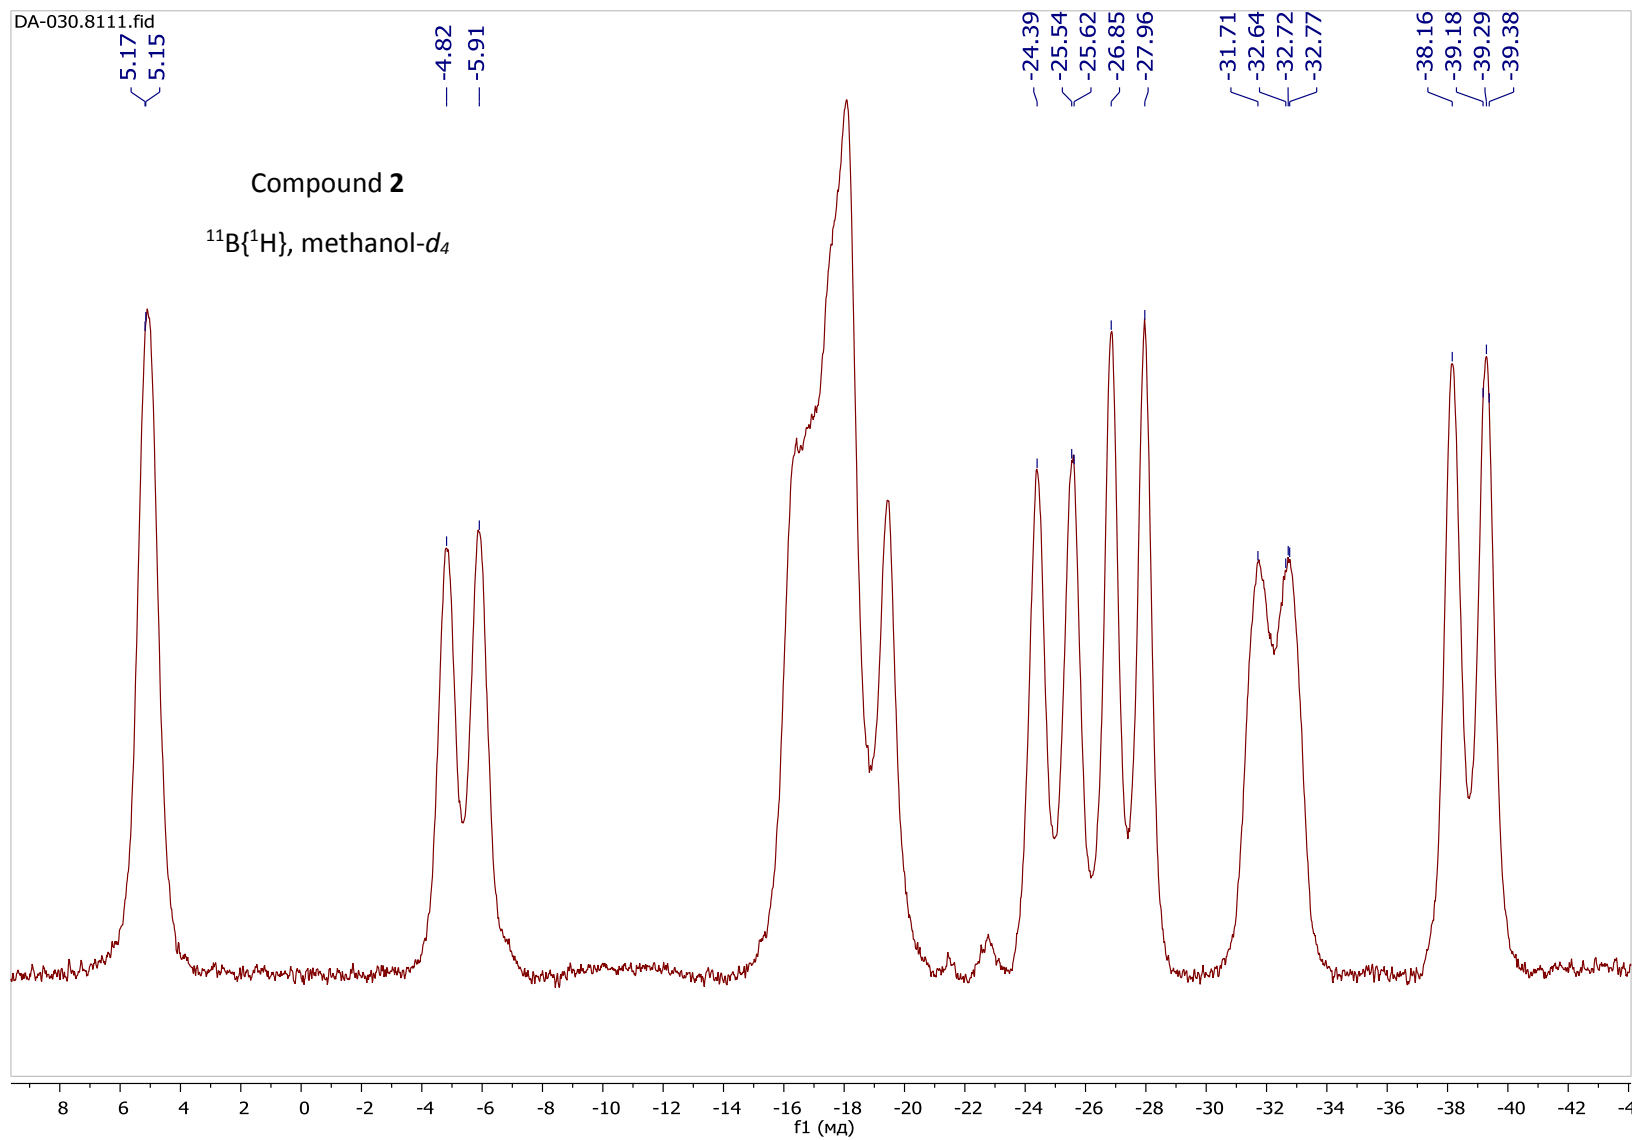

Figure S15.  $^{11}\text{B}\{^1\text{H}\}$  NMR spectrum of compound **2**

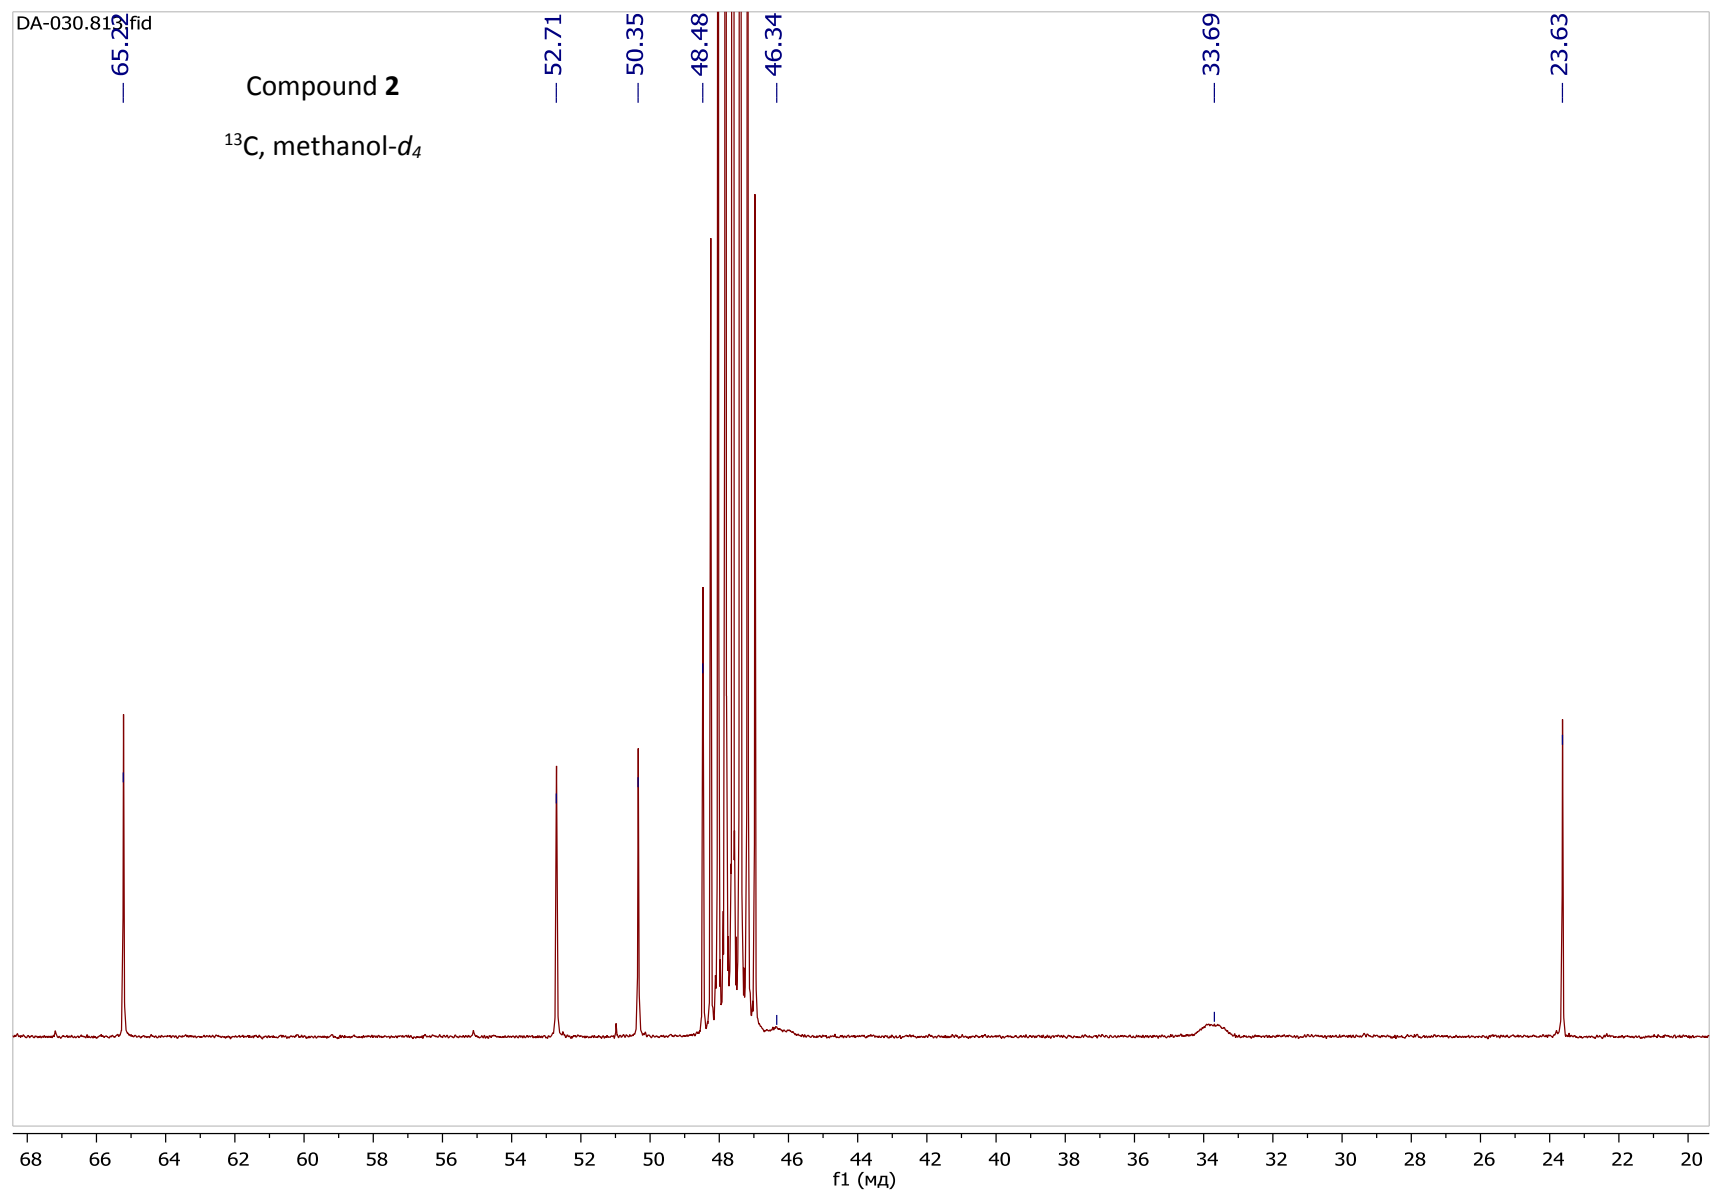

Figure S16.  $^{13}\text{C}$  NMR spectrum of compound **2**

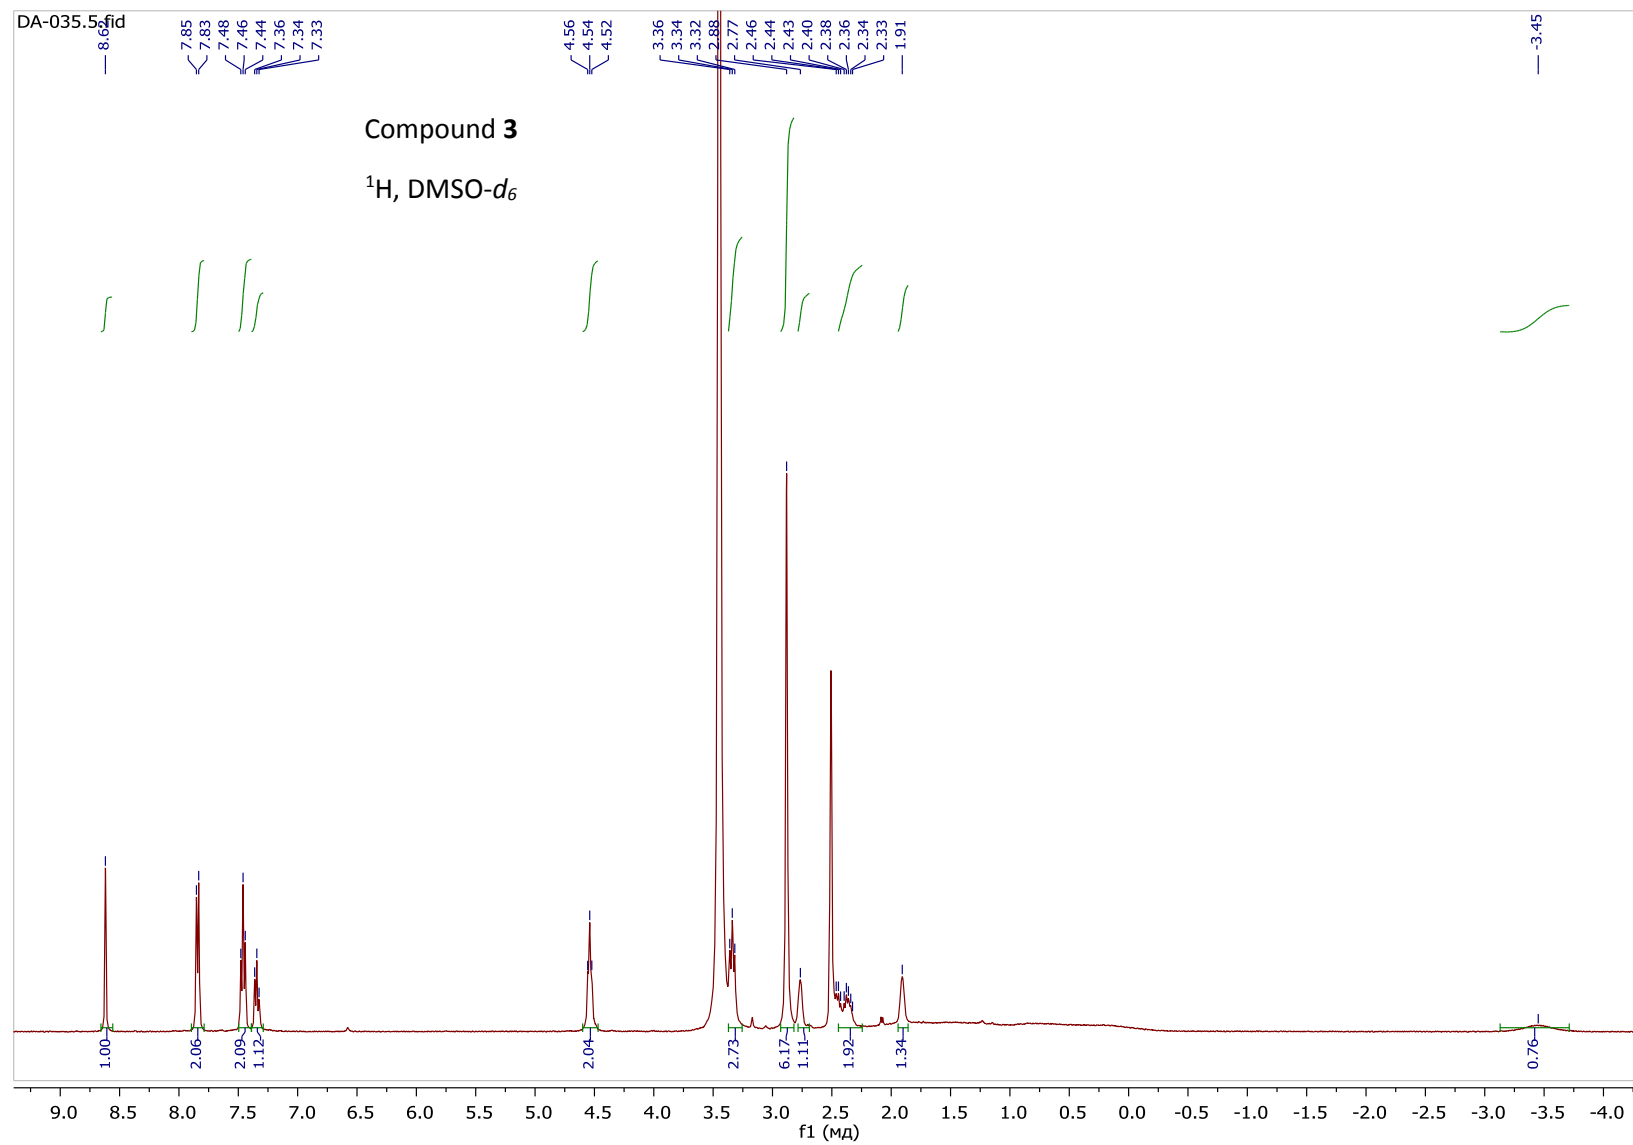

Figure S17.  $^1\text{H}$  NMR spectrum of compound **3**

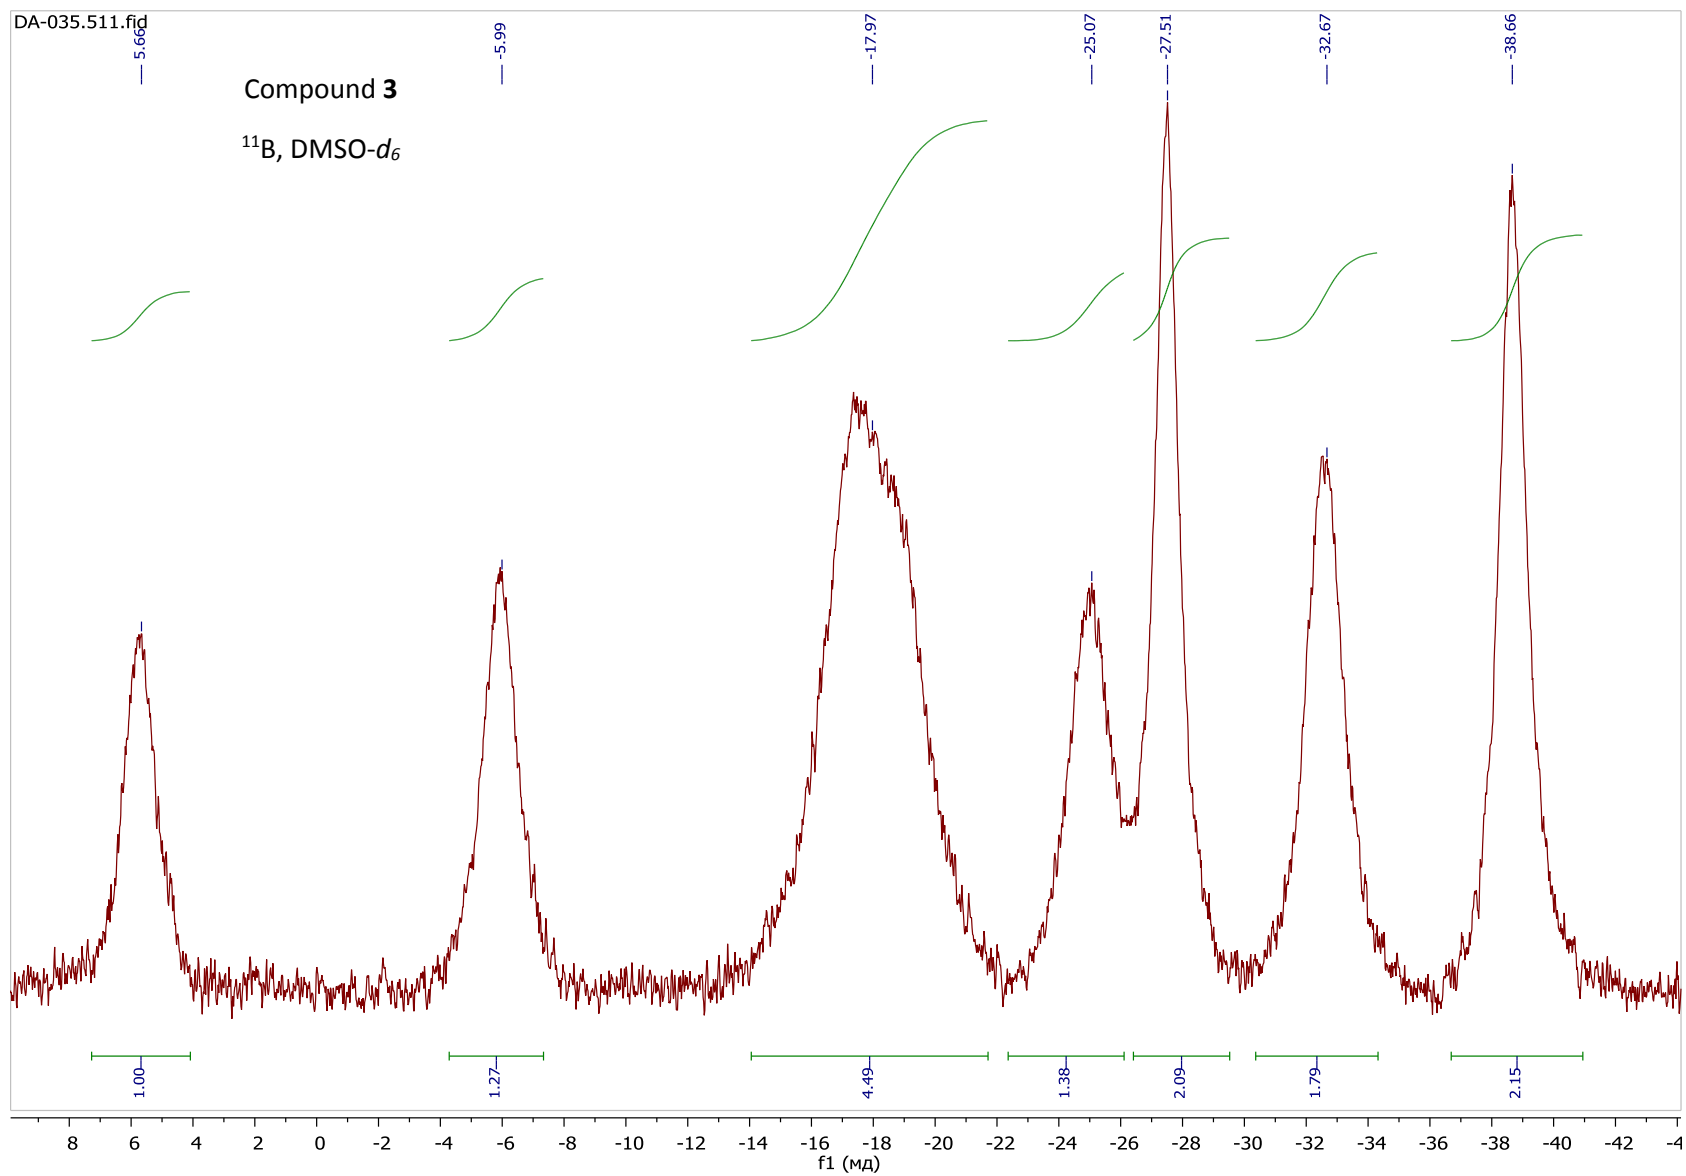

Figure S18.  $^{11}\text{B}$  NMR spectrum of compound 3



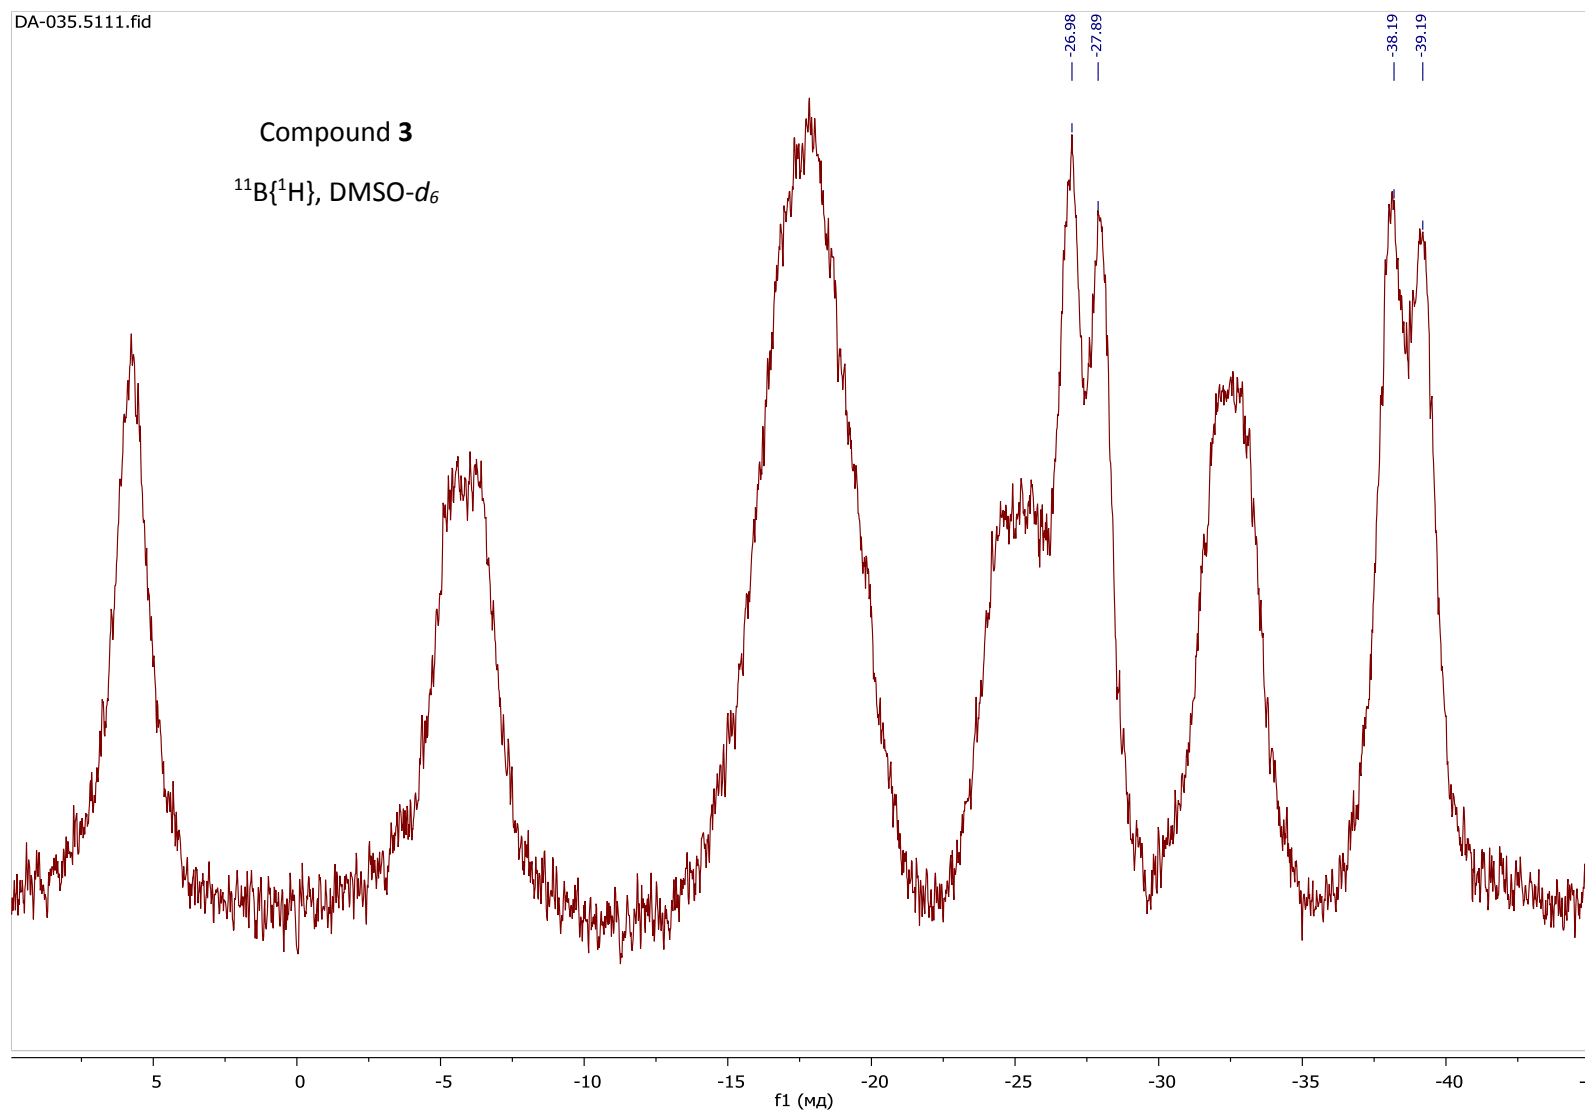

Figure S19.  $^{11}\text{B}\{^1\text{H}\}$  NMR spectrum of compound **3**

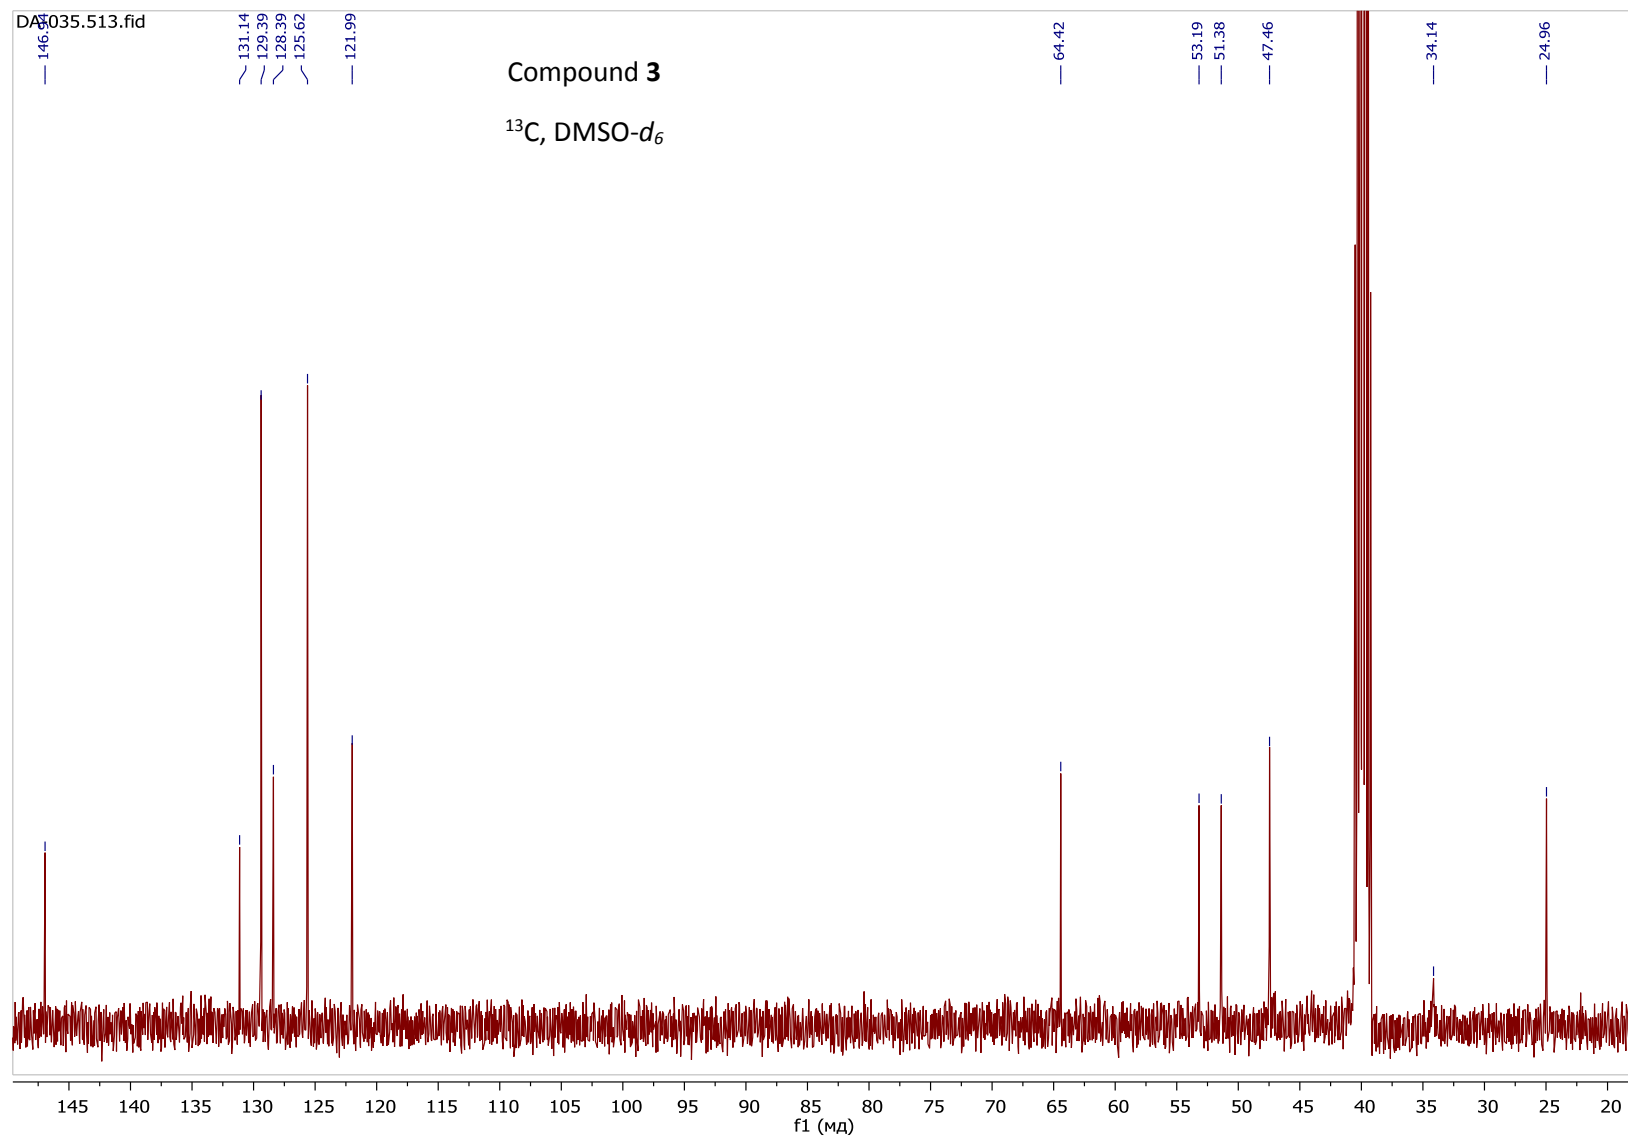

Figure S20.  $^{13}\text{C}$  NMR spectrum of compound **3**

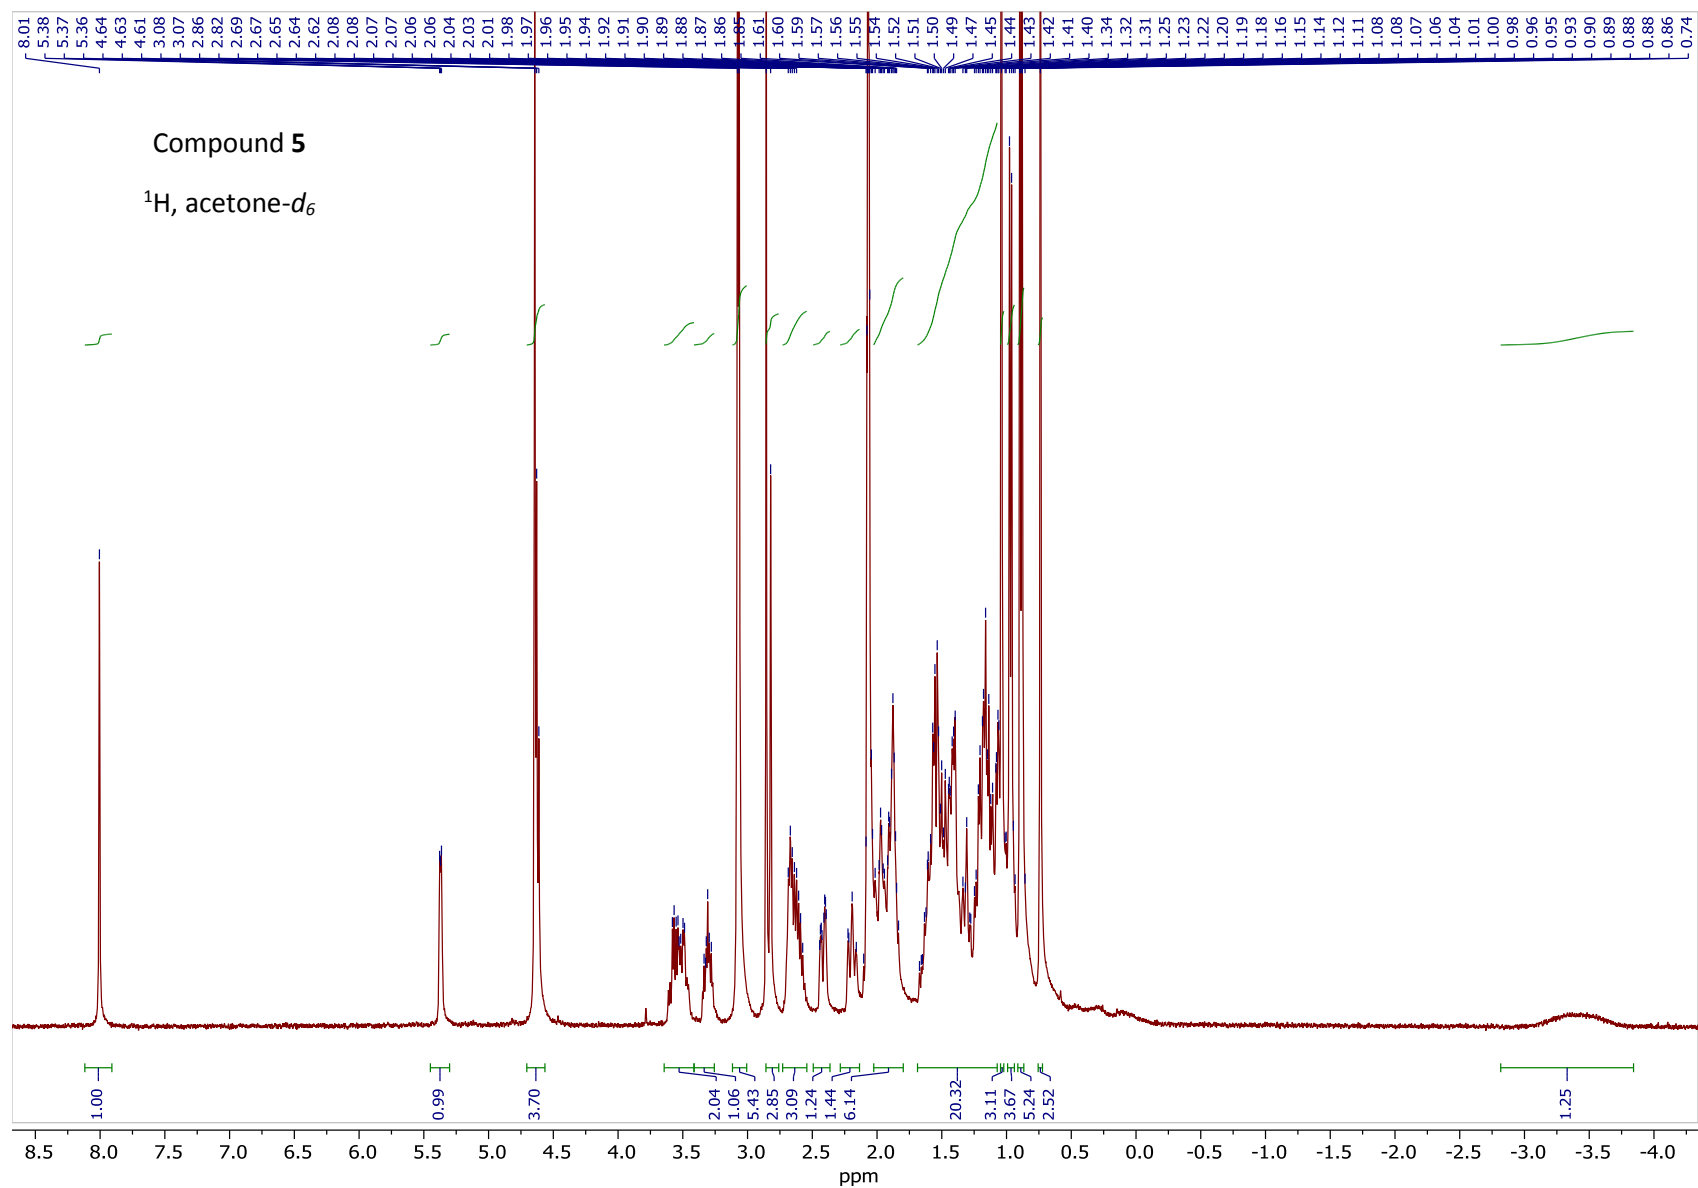

Figure S21.  $^1\text{H}$  NMR spectrum of compound 5

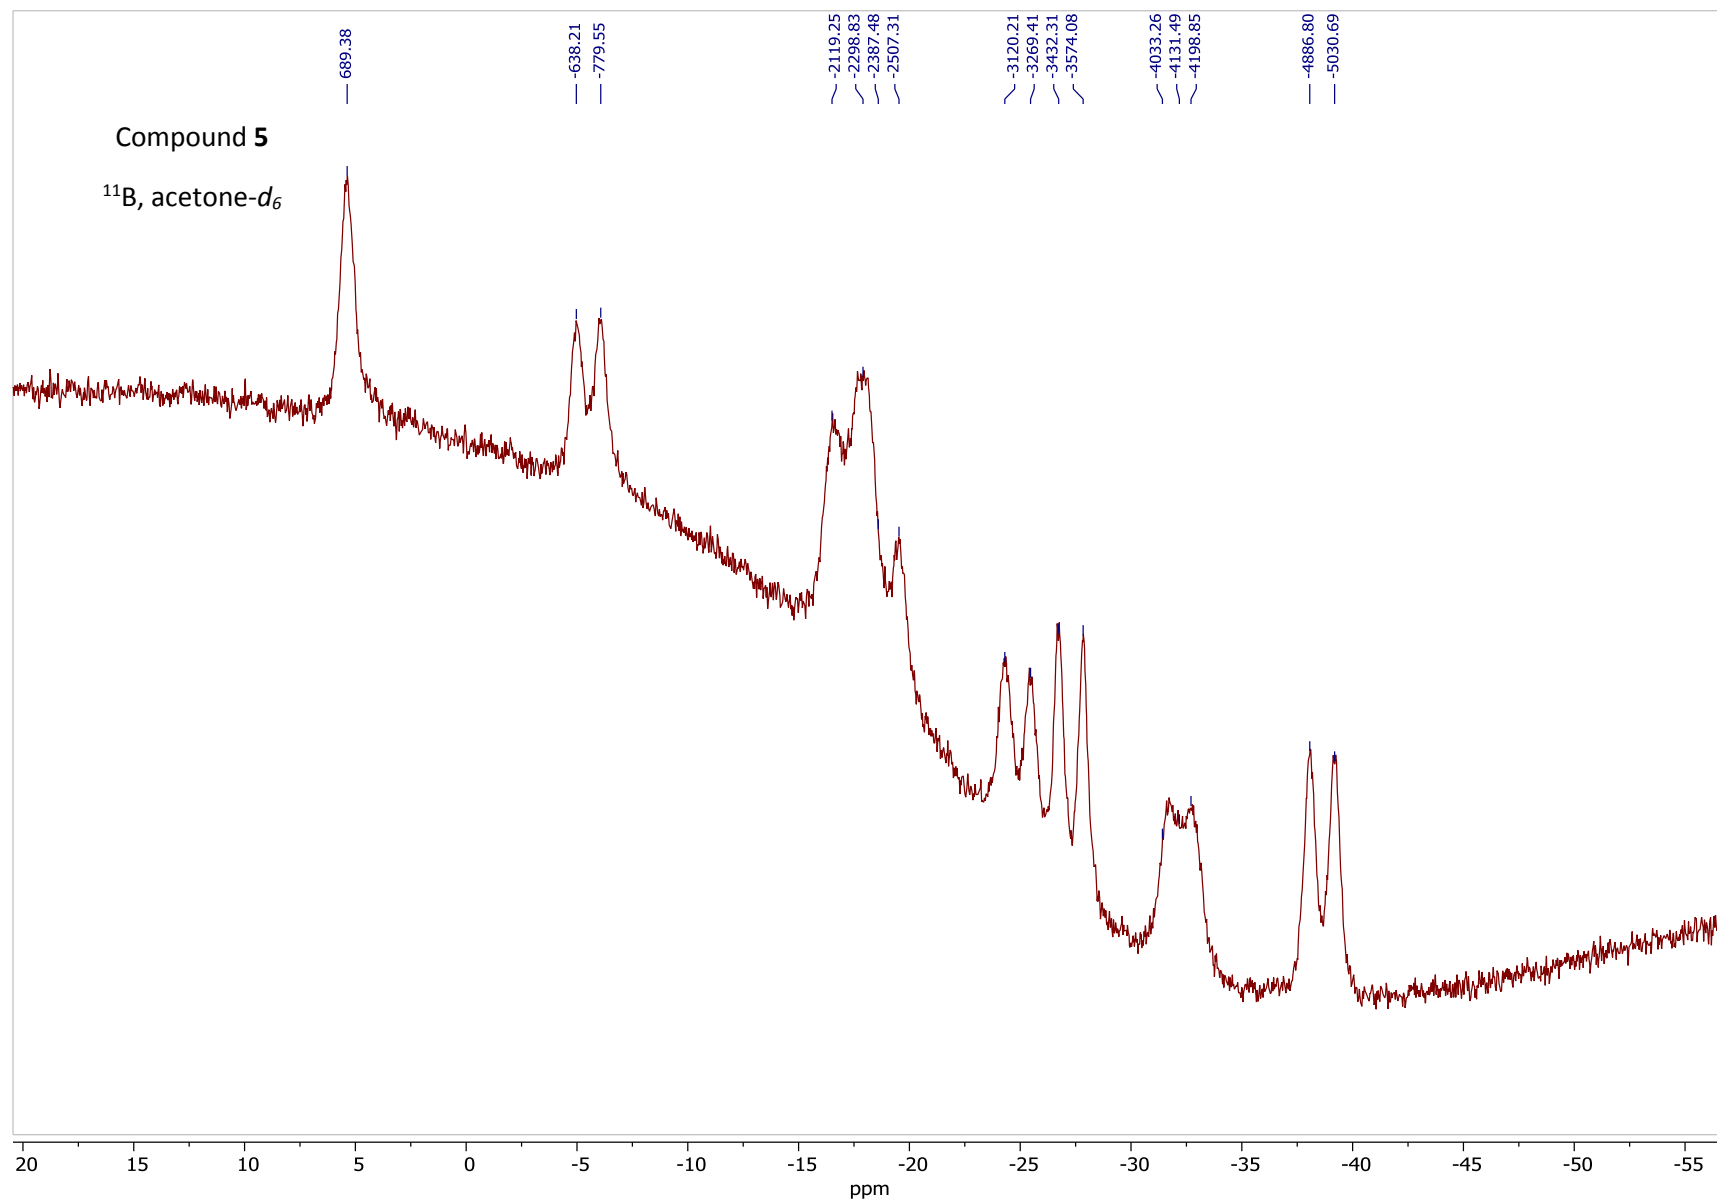

Figure S22.  $^{11}\text{B}$  NMR spectrum of compound 5

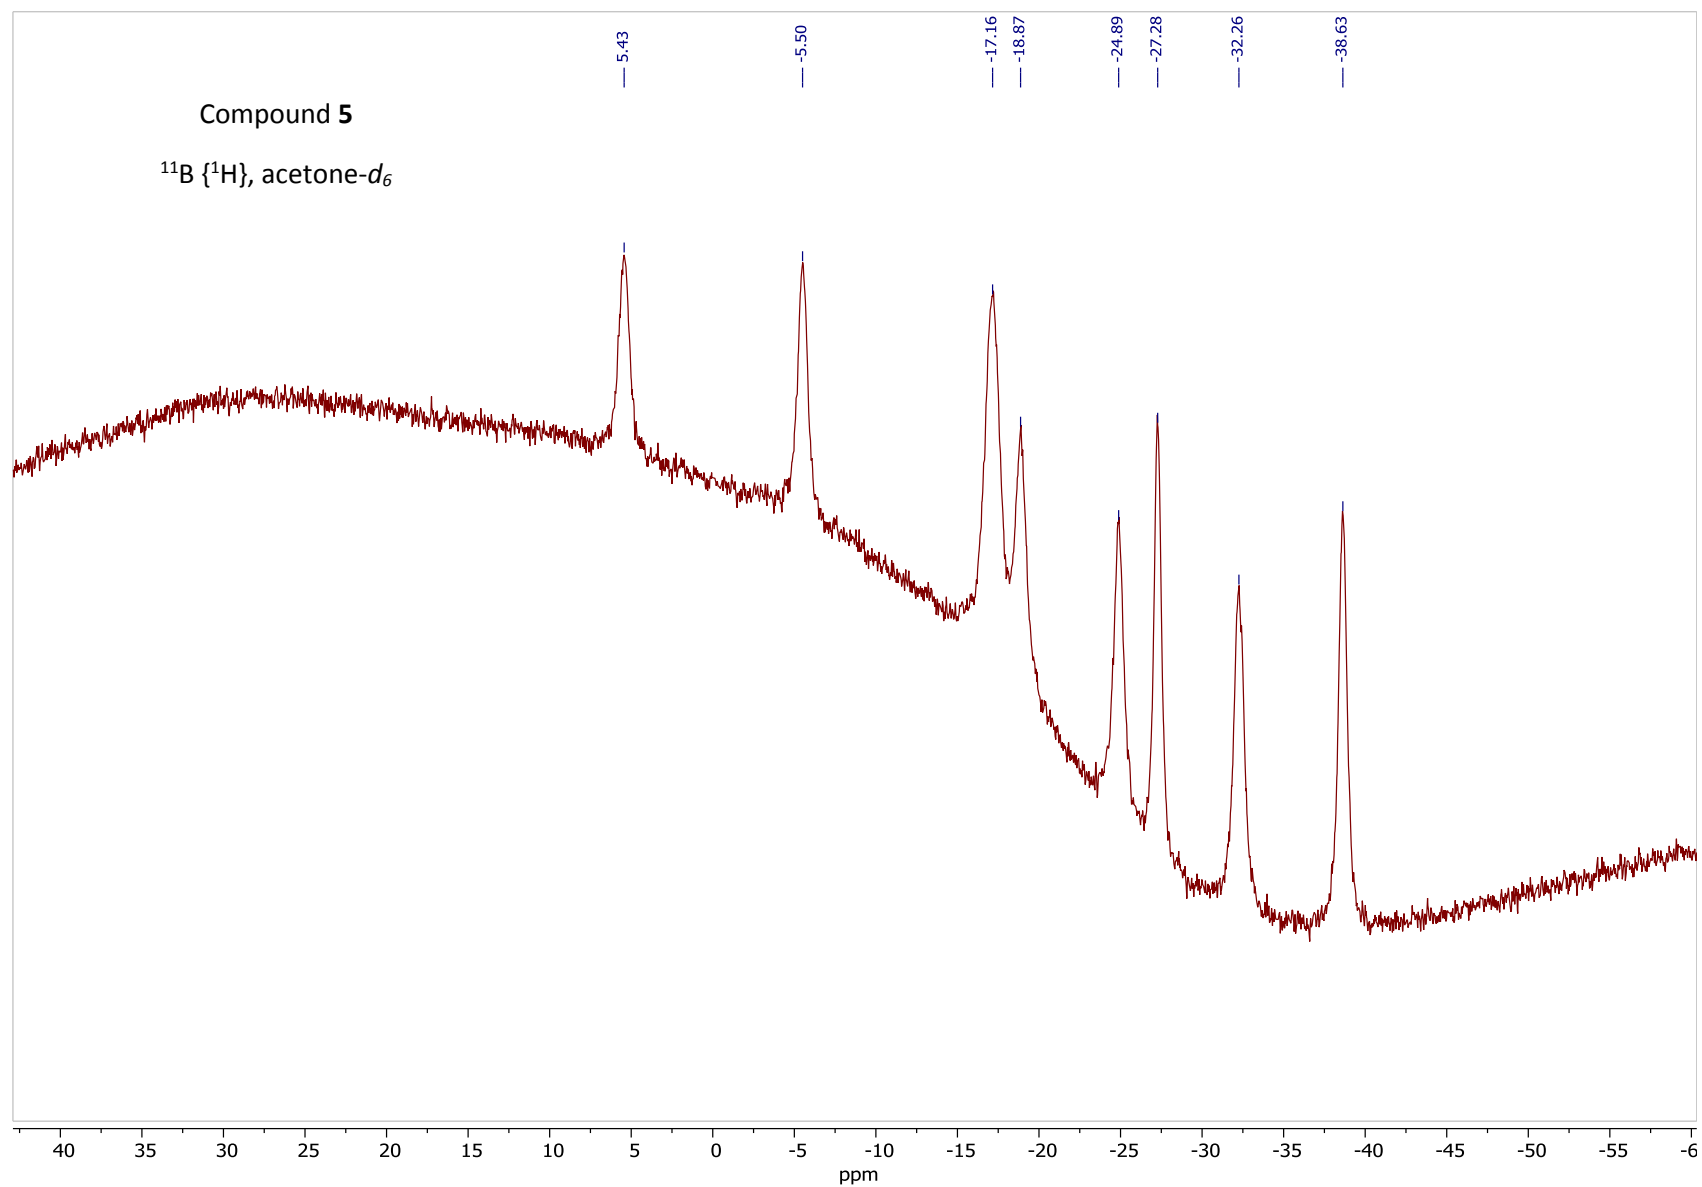

Figure S23.  $^{11}\text{B}\{^1\text{H}\}$  NMR spectrum of compound 5

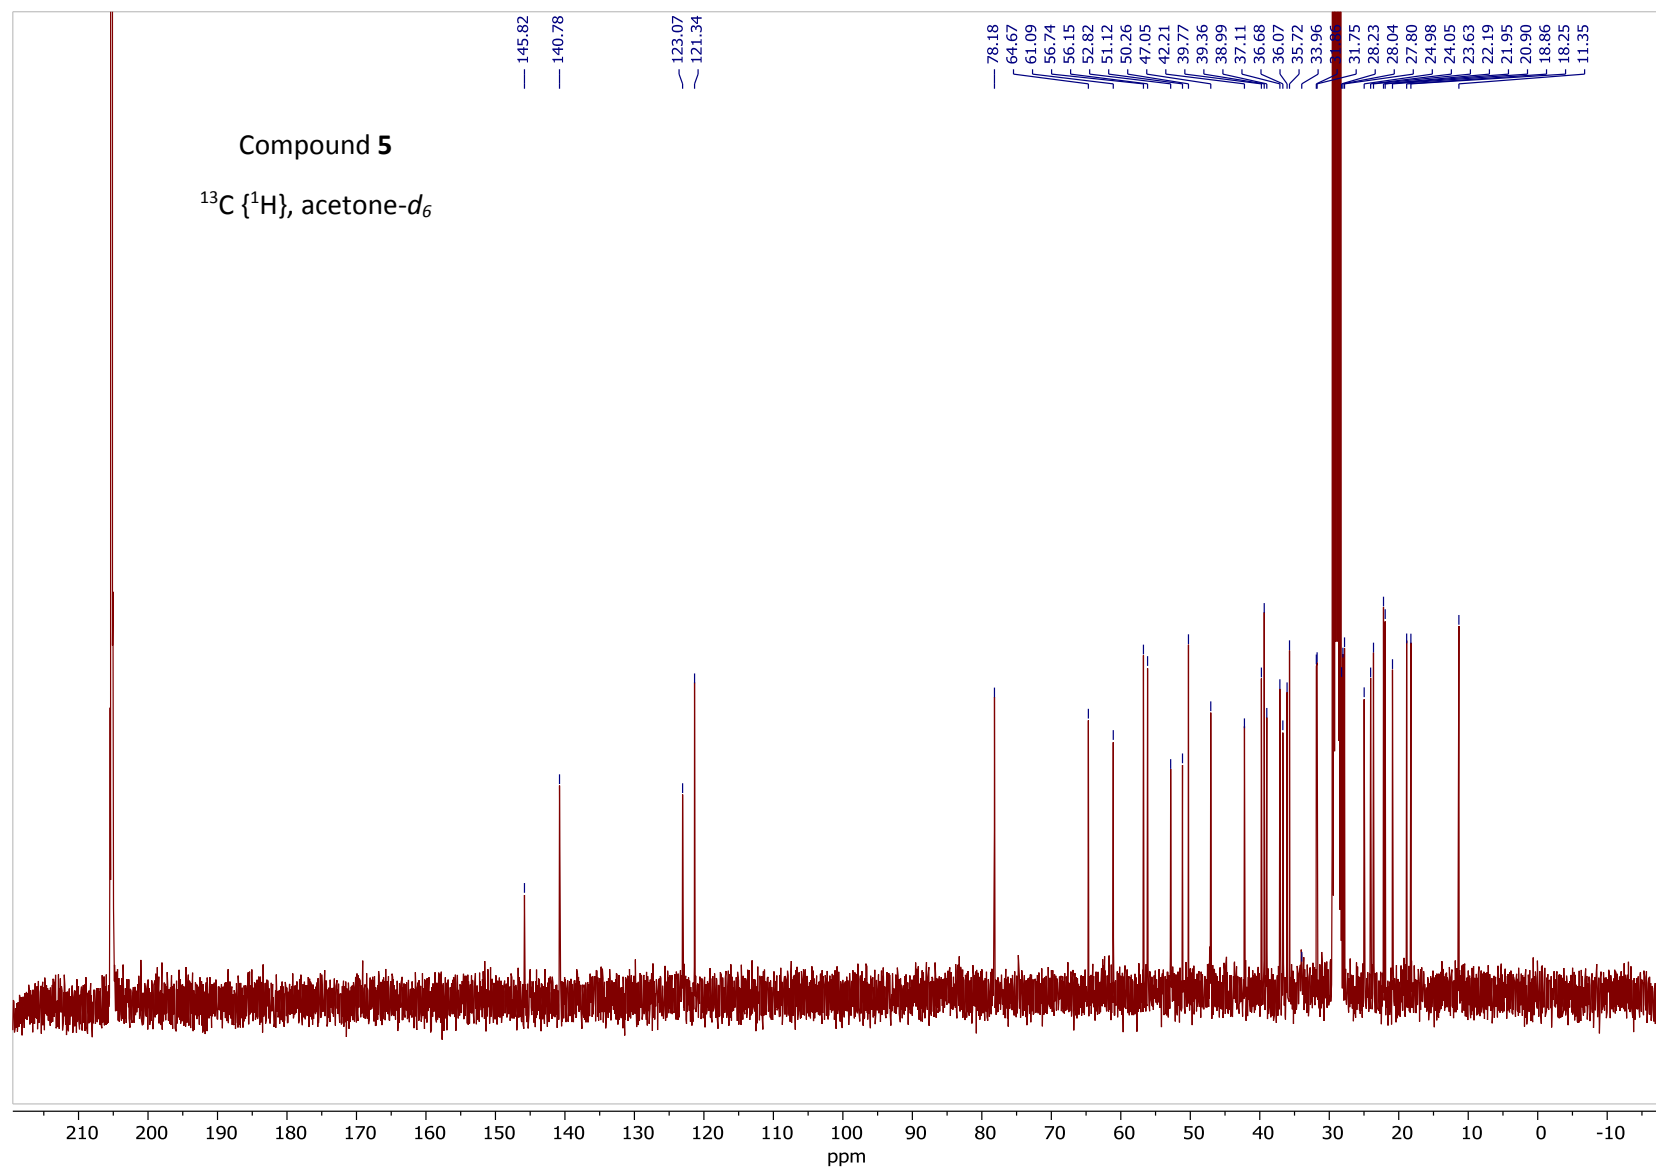

Figure S24.  $^{13}\text{C}$  NMR spectrum of compound **5**

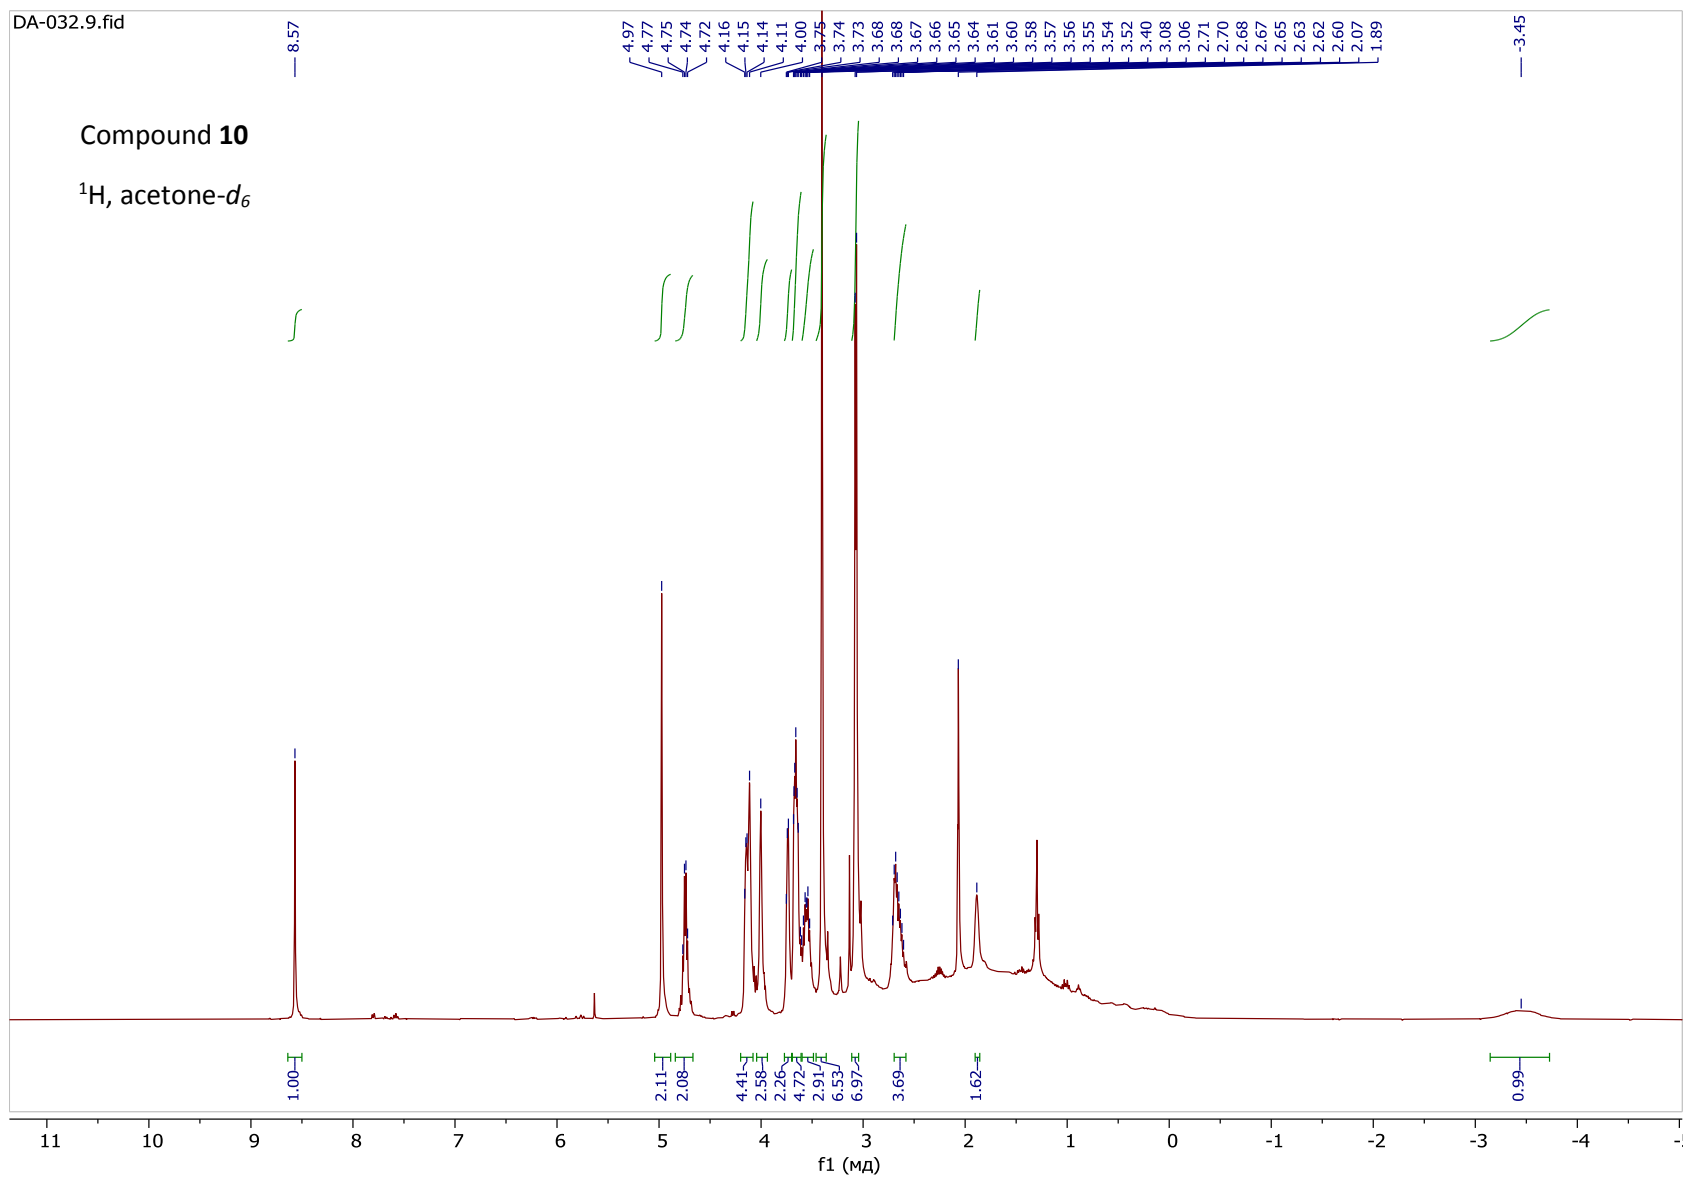

Figure S25.  $^1\text{H}$  NMR spectrum of compound **10**

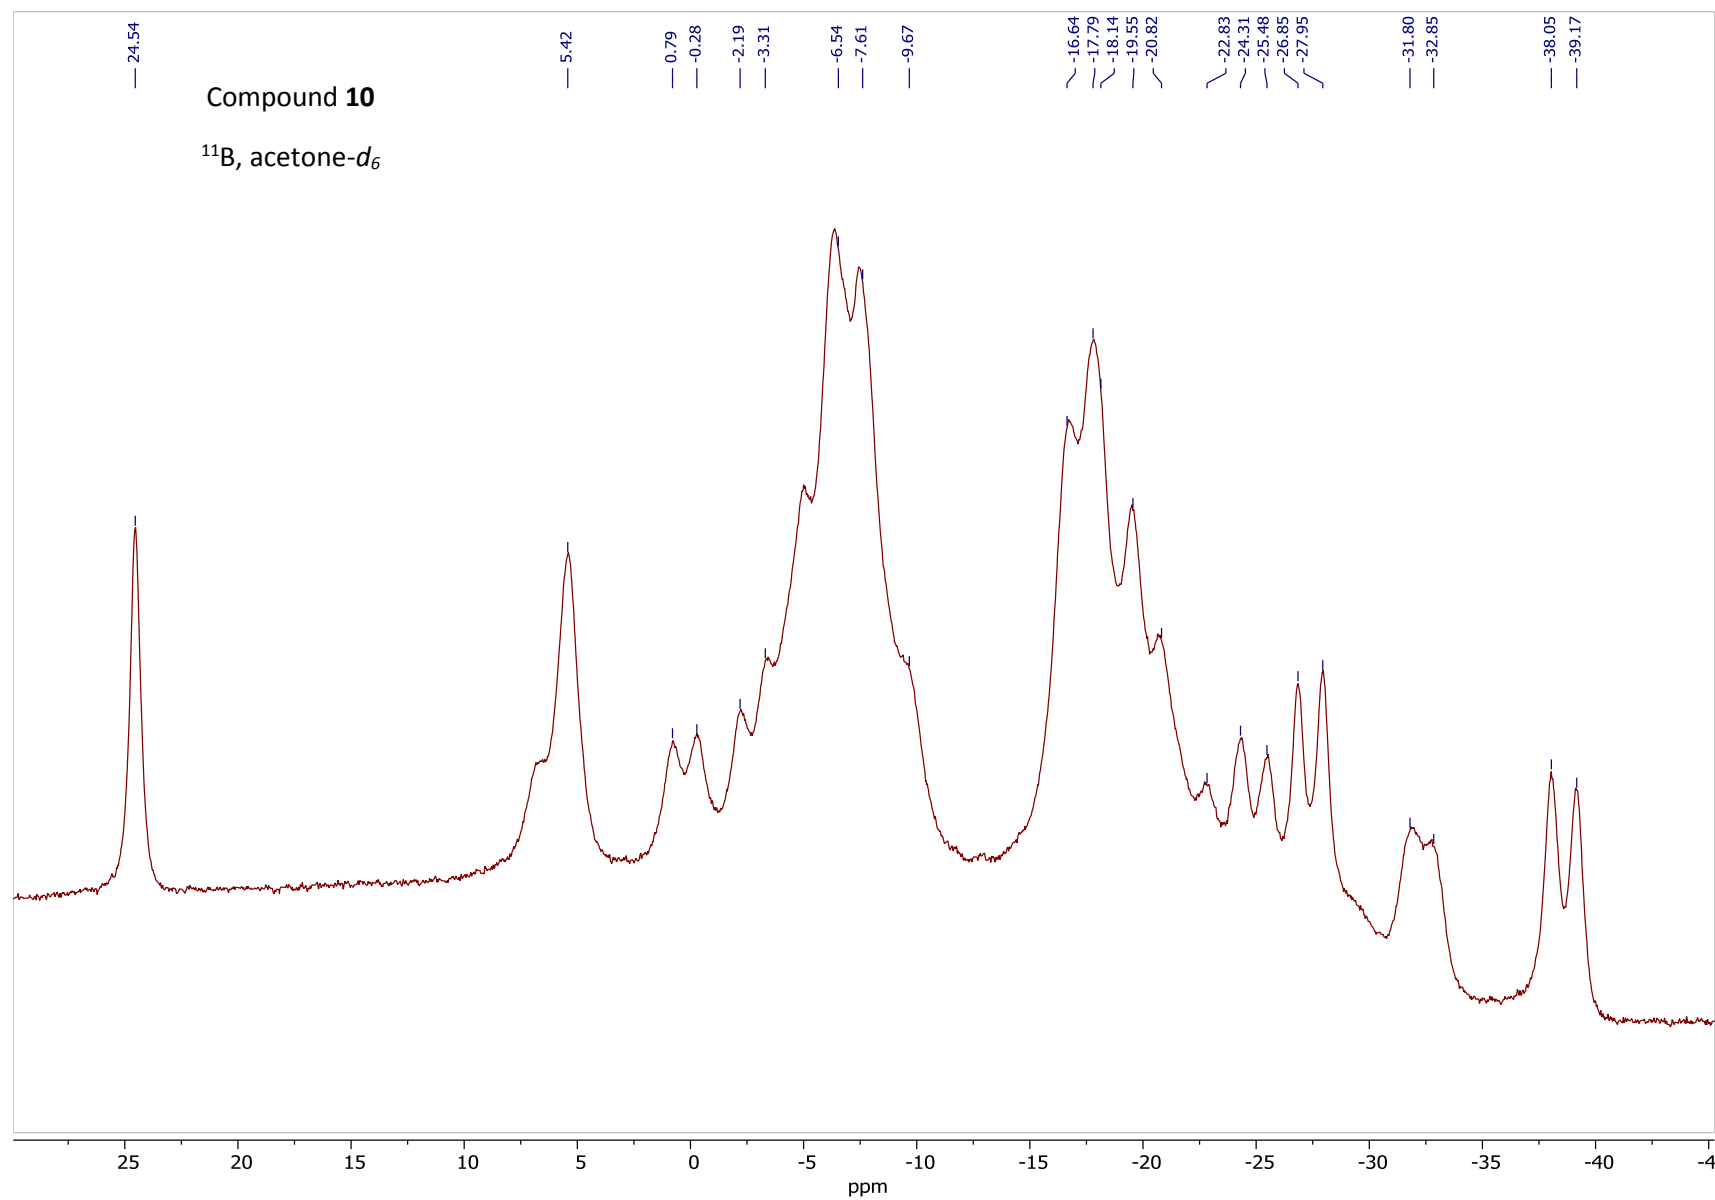

Figure S26.  $^{11}\text{B}$  NMR spectrum of compound **10**



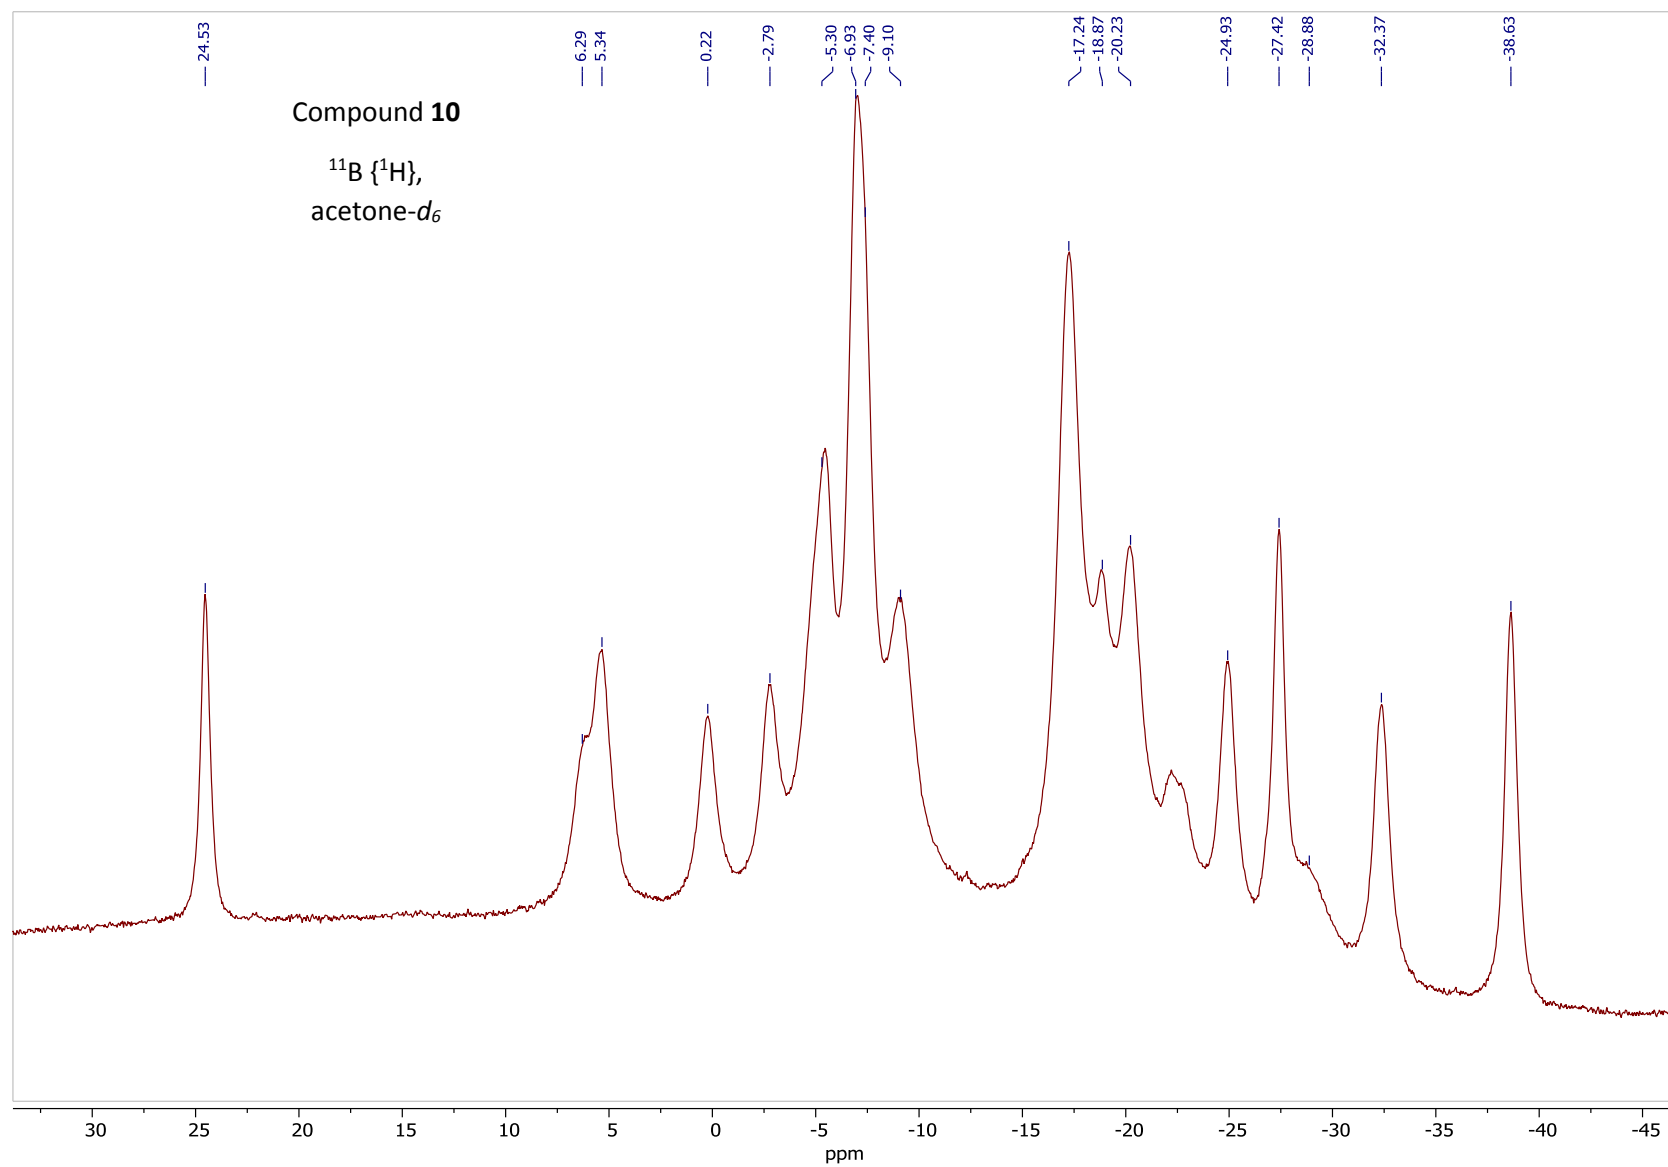

Figure S27.  $^{11}\text{B}\{^1\text{H}\}$  NMR spectrum of compound **10**

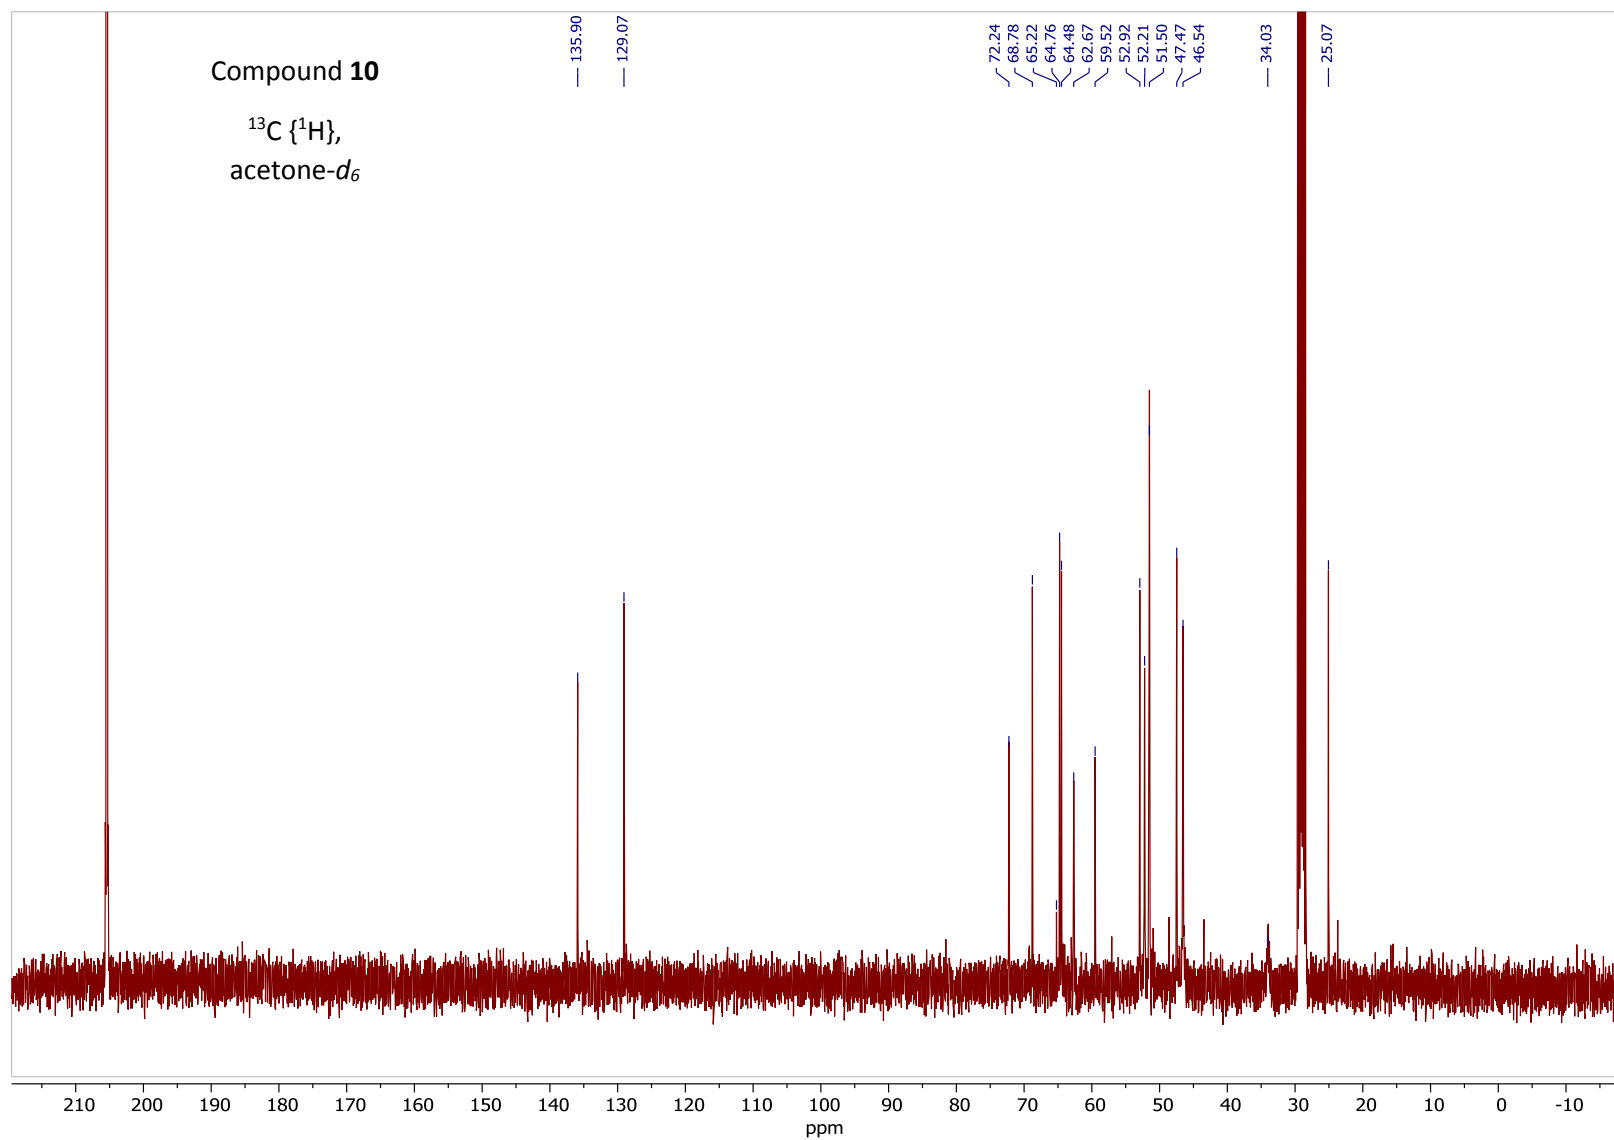

Figure S28.  $^{13}\text{C}$  NMR spectrum of compound **10**

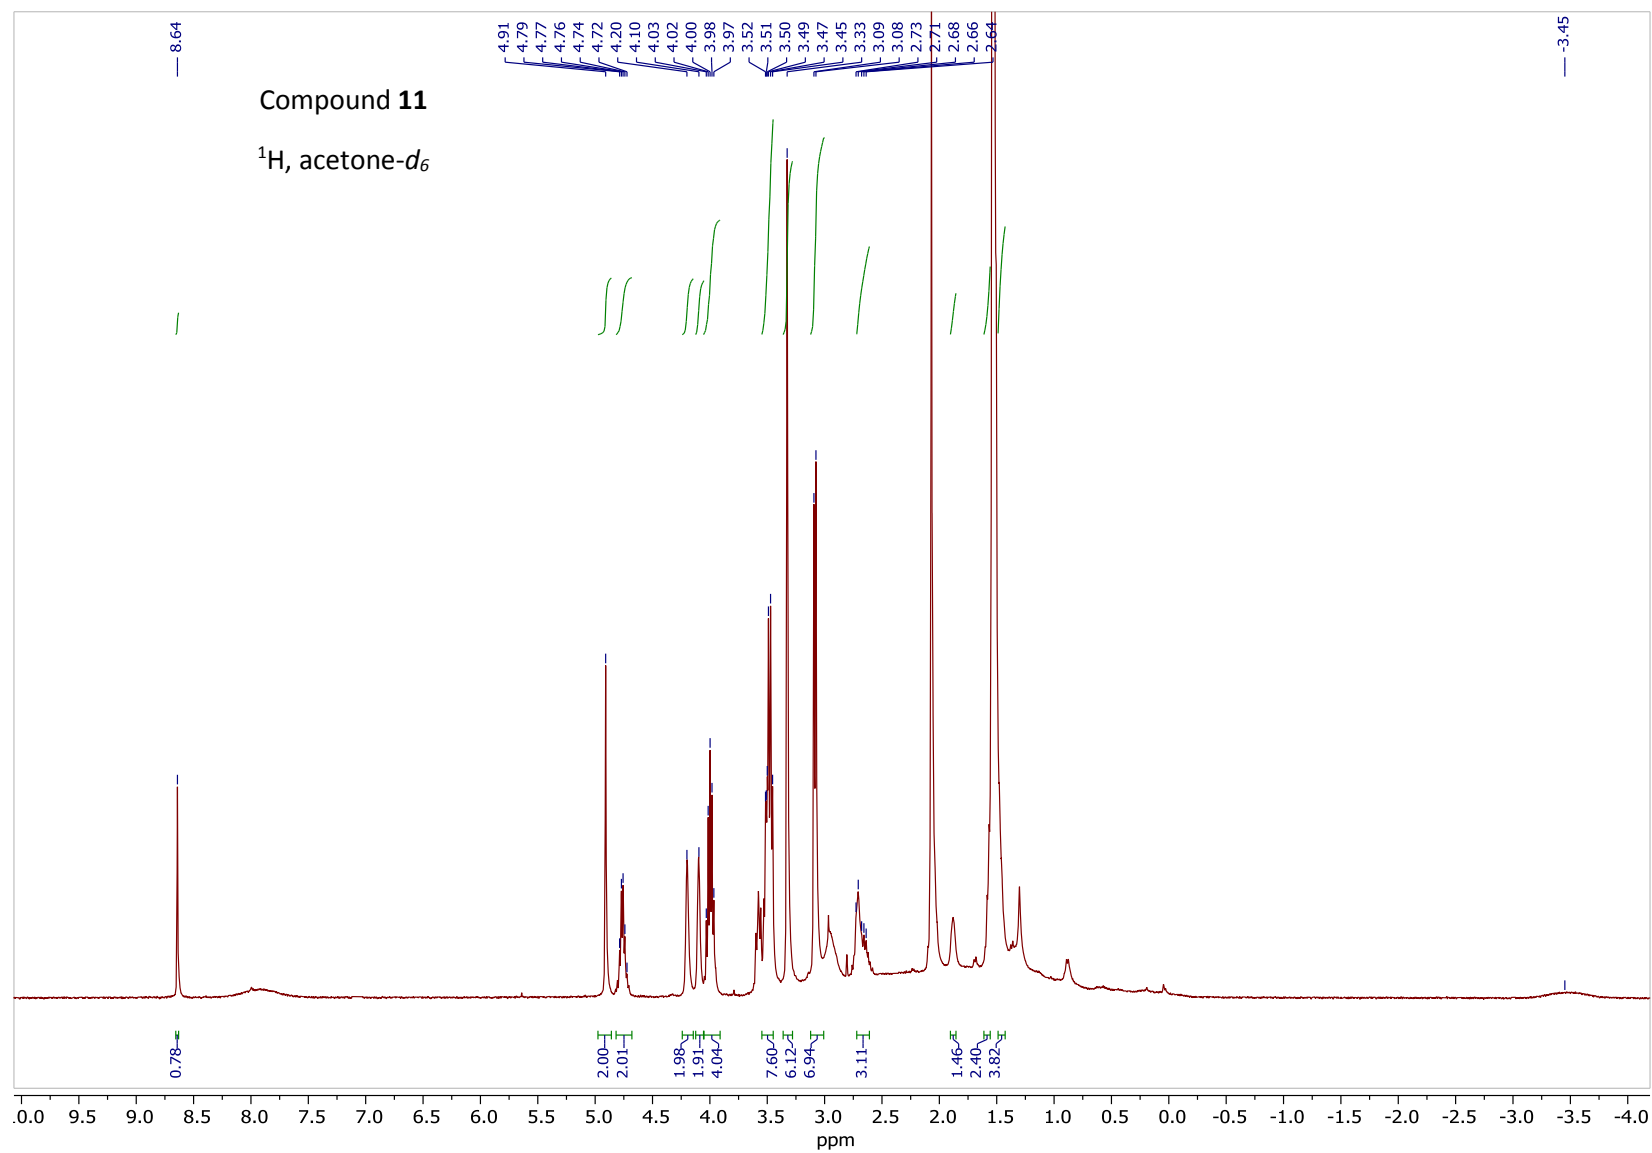

Figure S29.  $^1\text{H}$  NMR spectrum of compound **11**

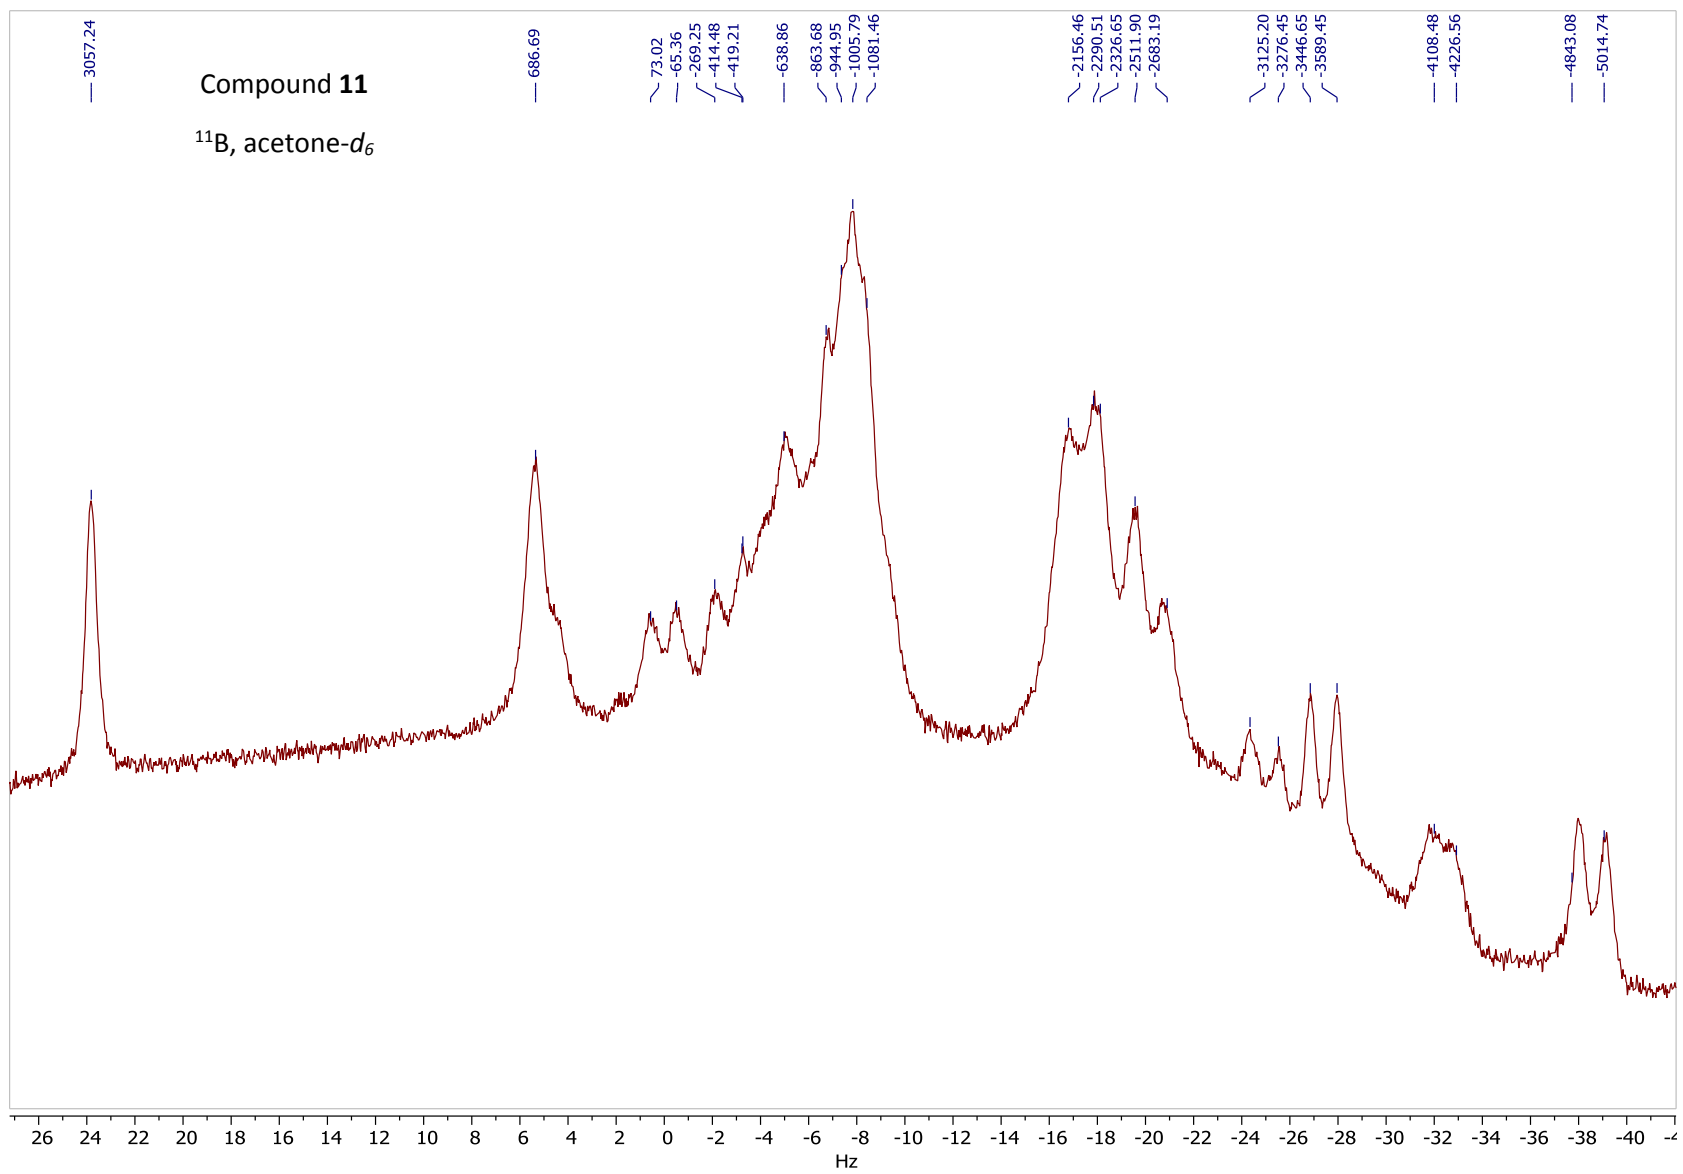

Figure S30.  $^{11}\text{B}$  NMR spectrum of compound **11**

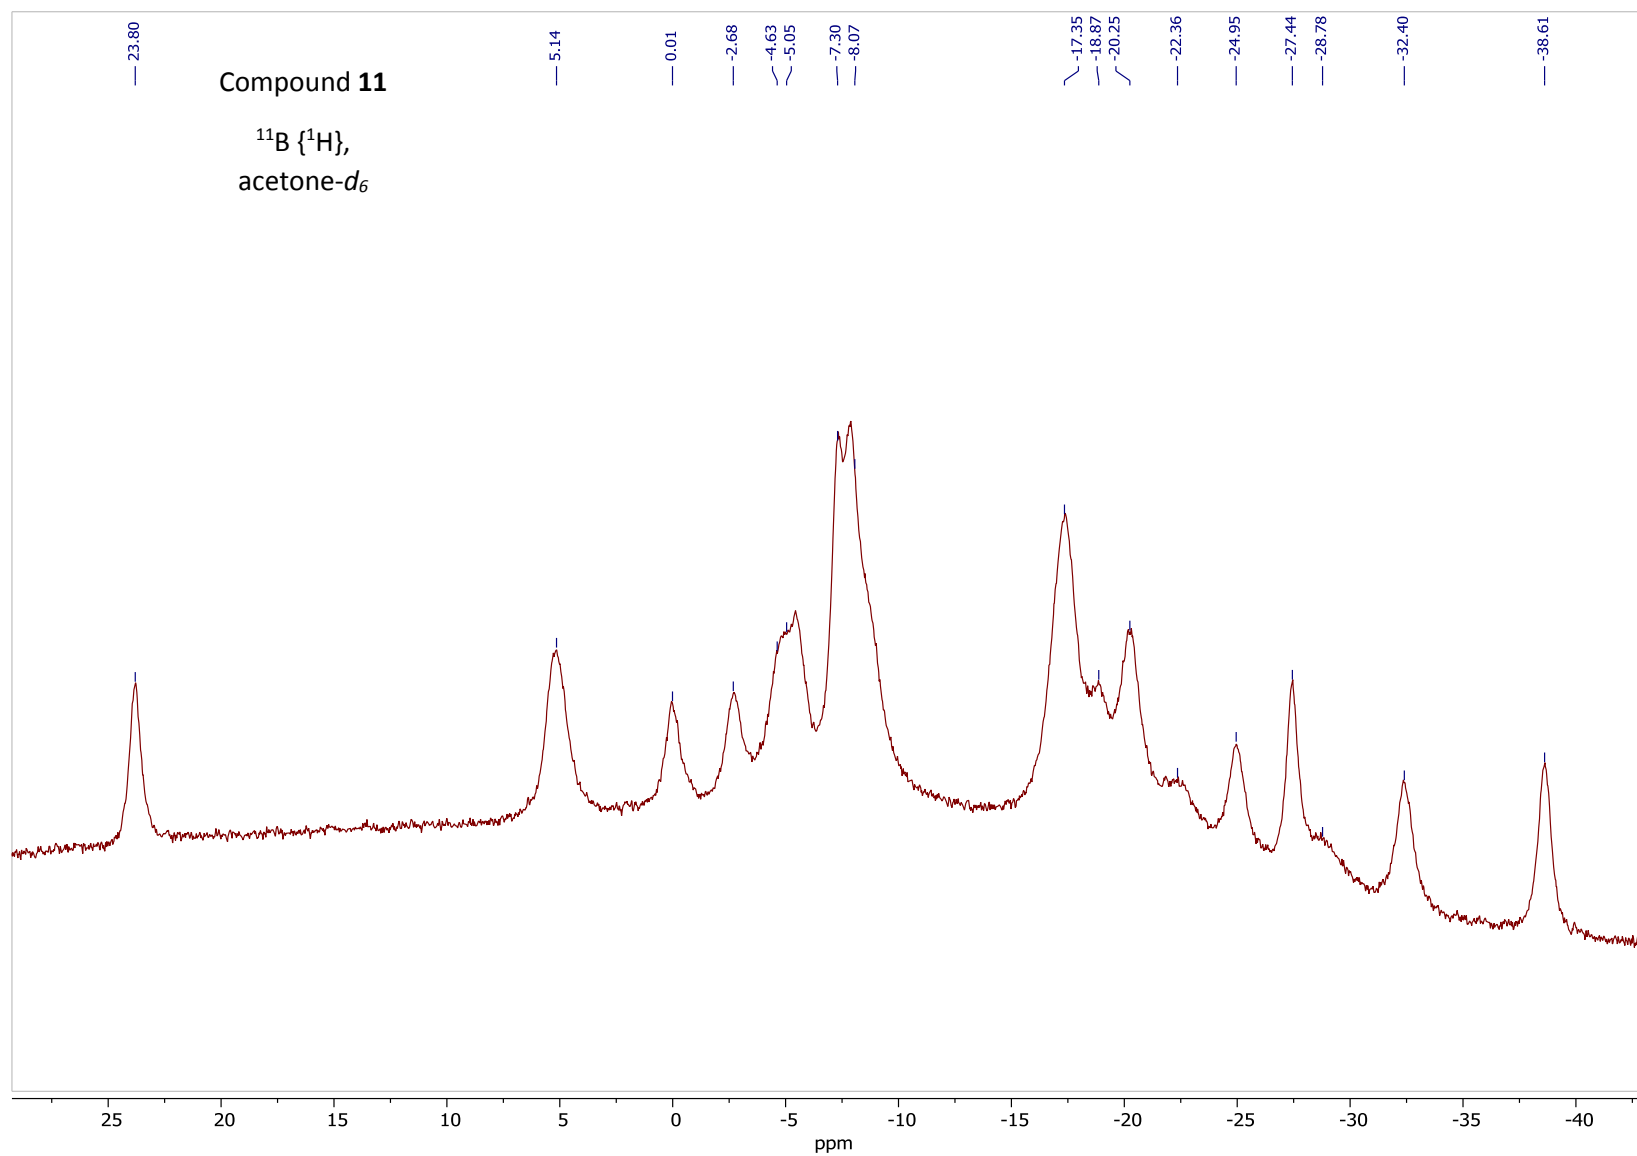

**Figure S31.**  $^{11}\text{B}\{^1\text{H}\}$  NMR spectrum of compound **11**

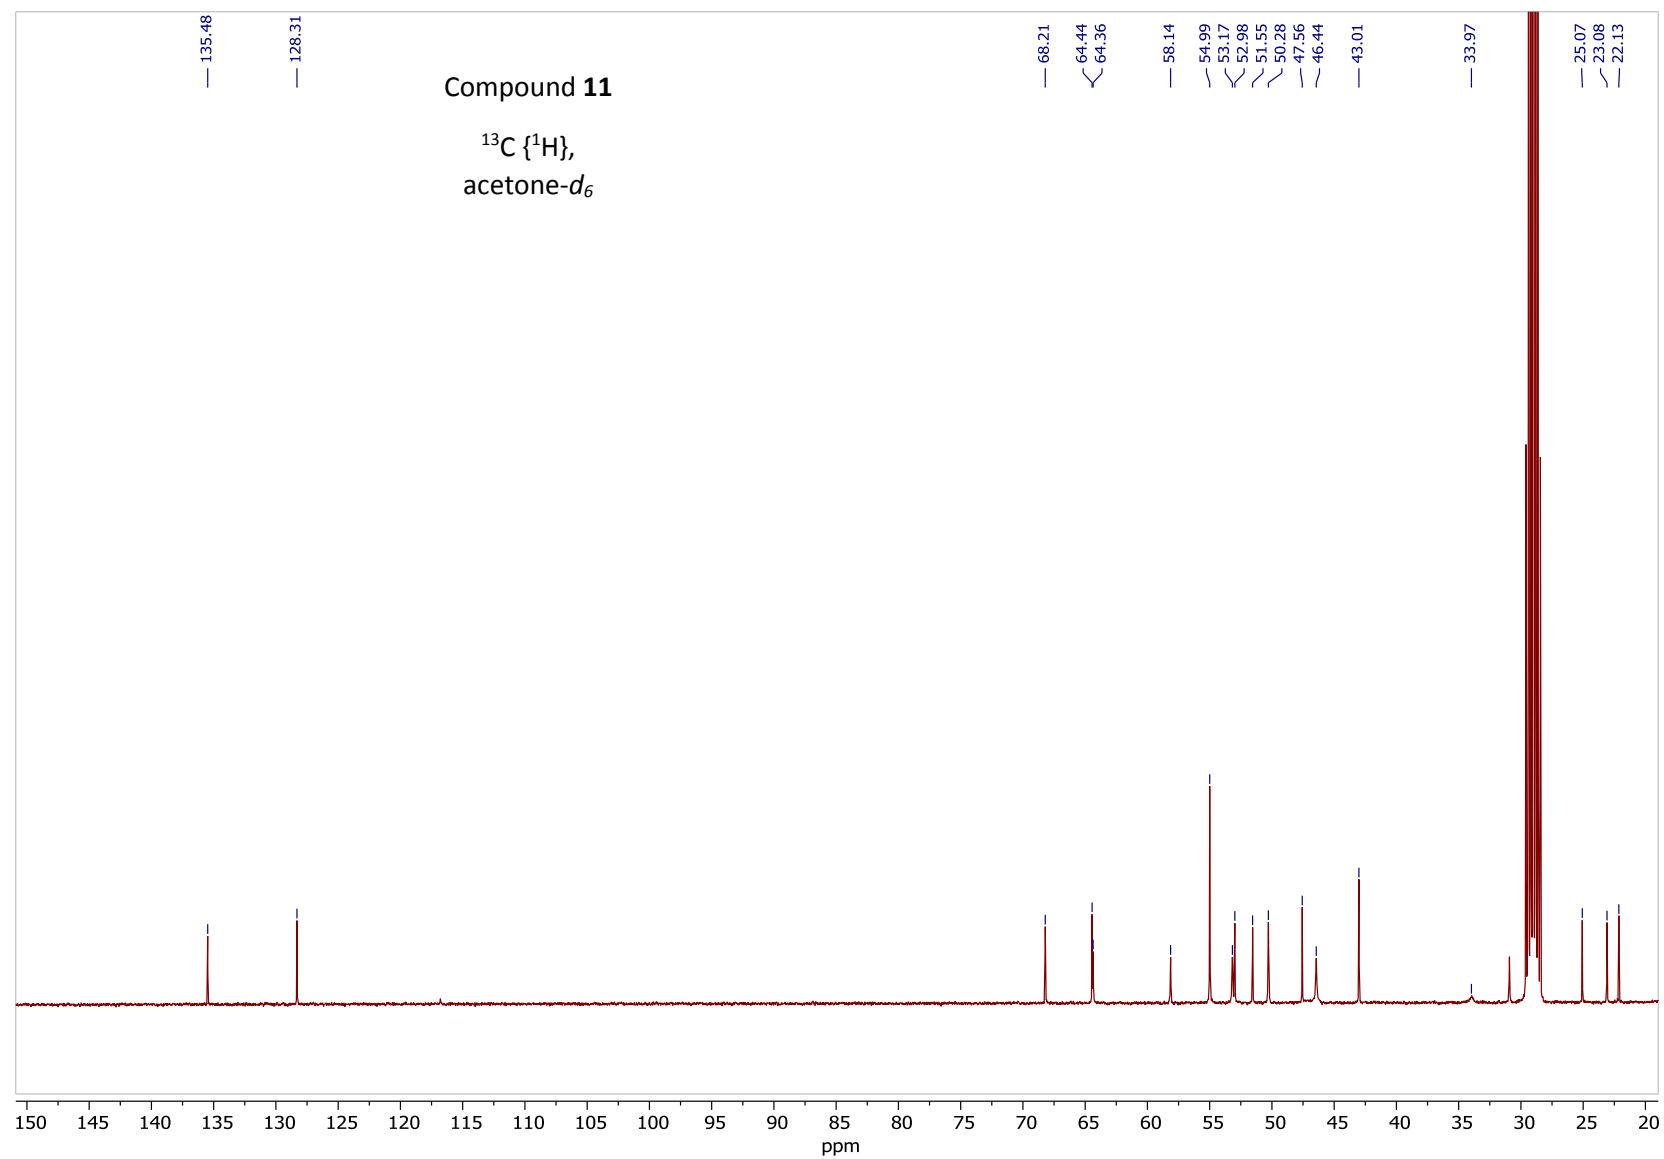

Figure S32.  $^{13}\text{C}$  NMR spectrum of compound **11**

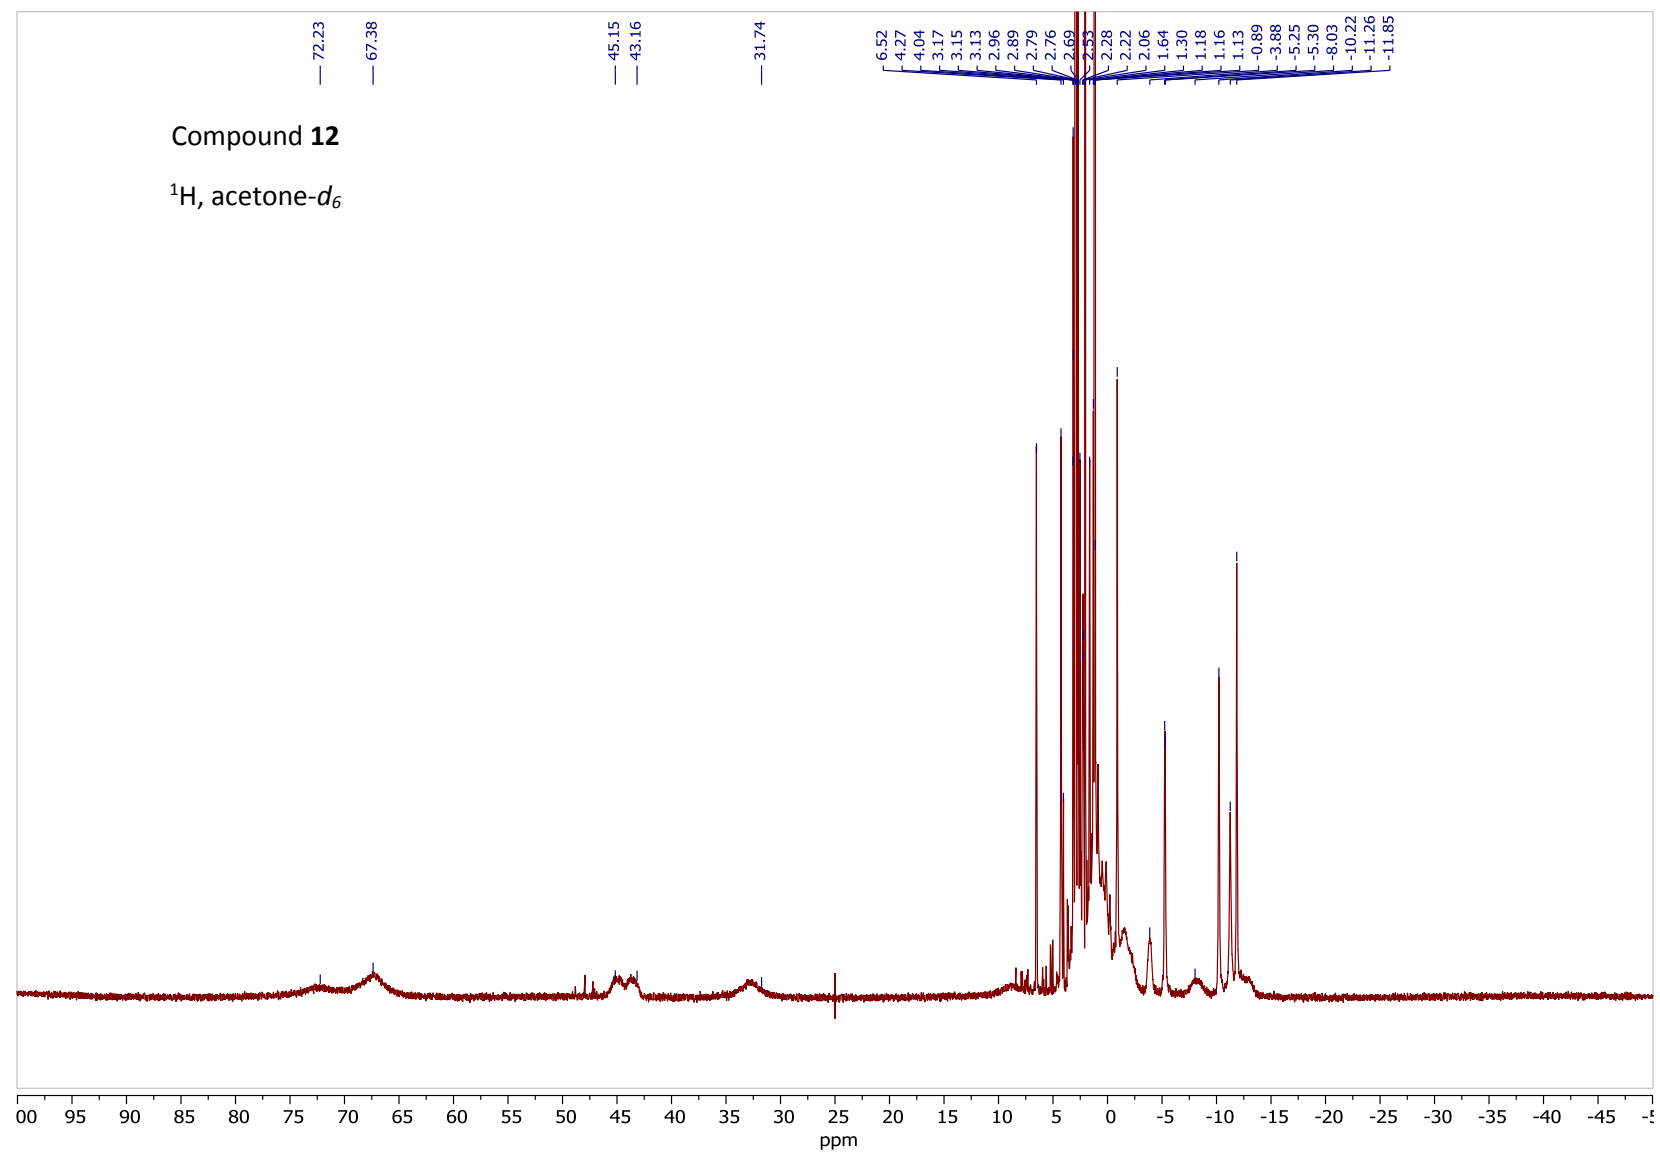

Figure S33.  $^1\text{H}$  NMR spectrum of compound **12**

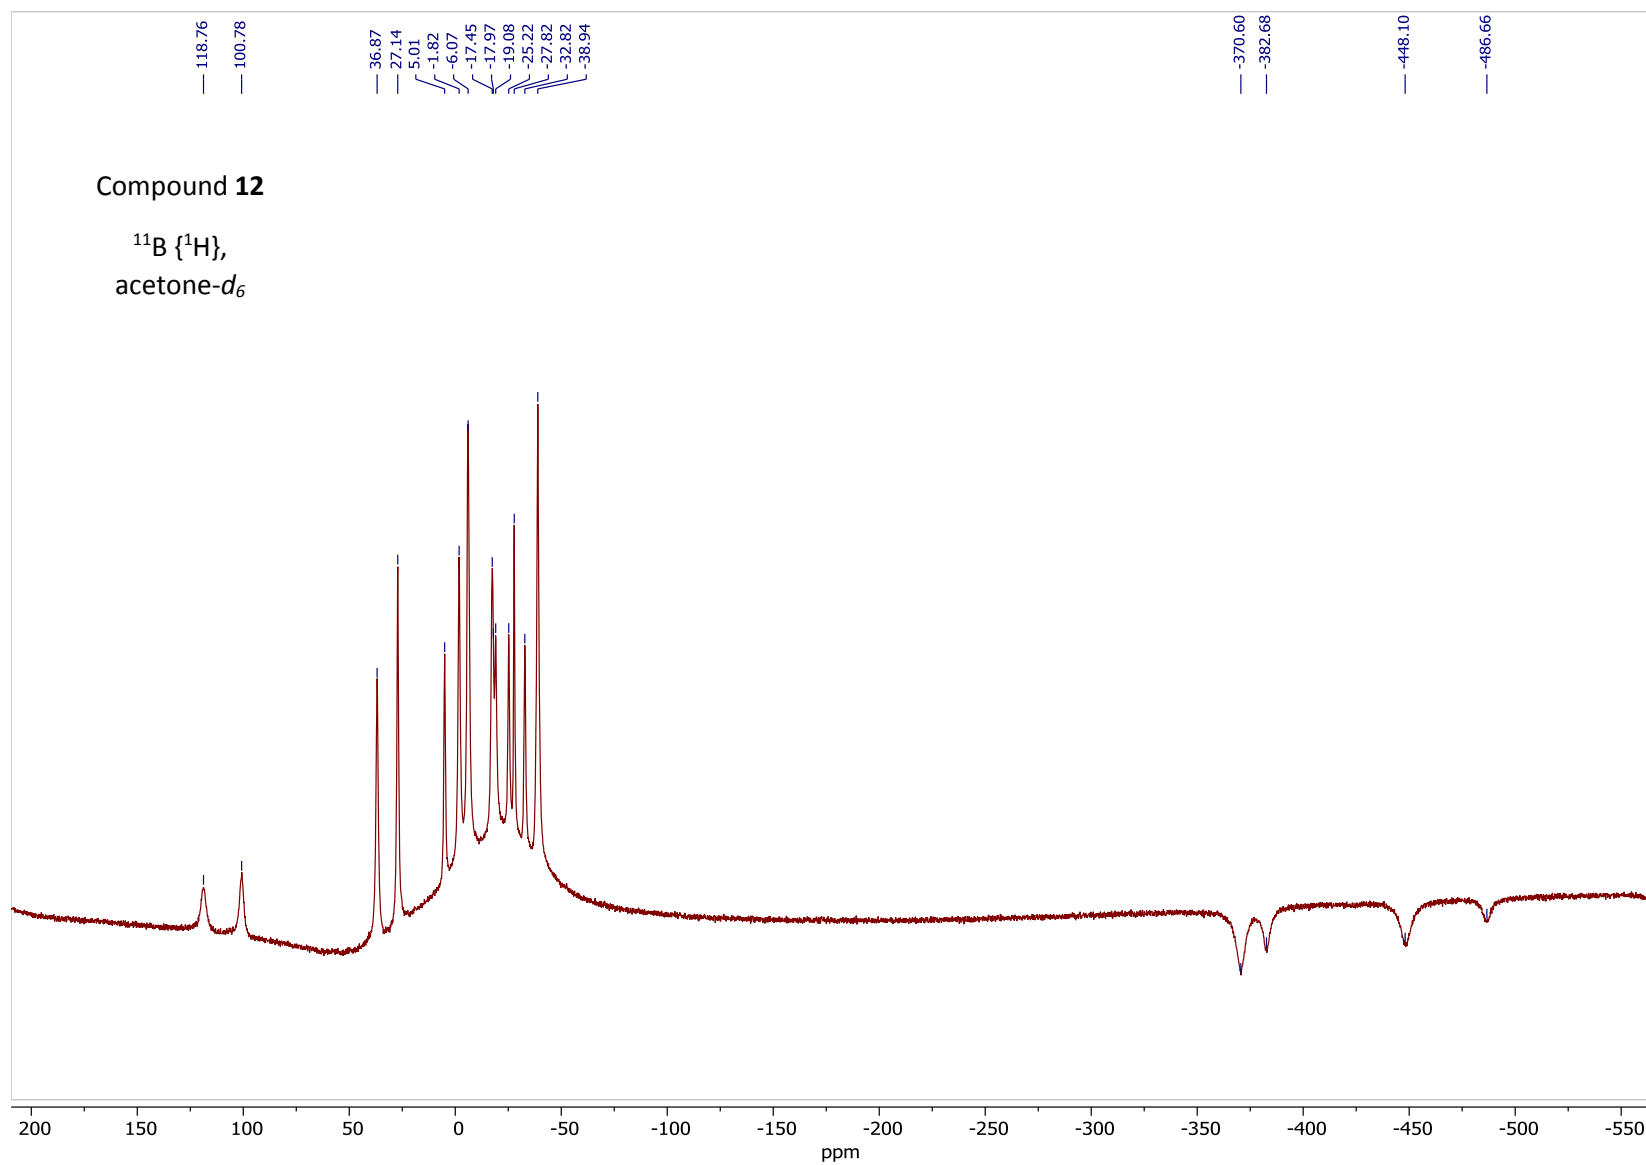

Figure S34.  $^{11}\text{B}\{^1\text{H}\}$  NMR spectrum of compound **12**



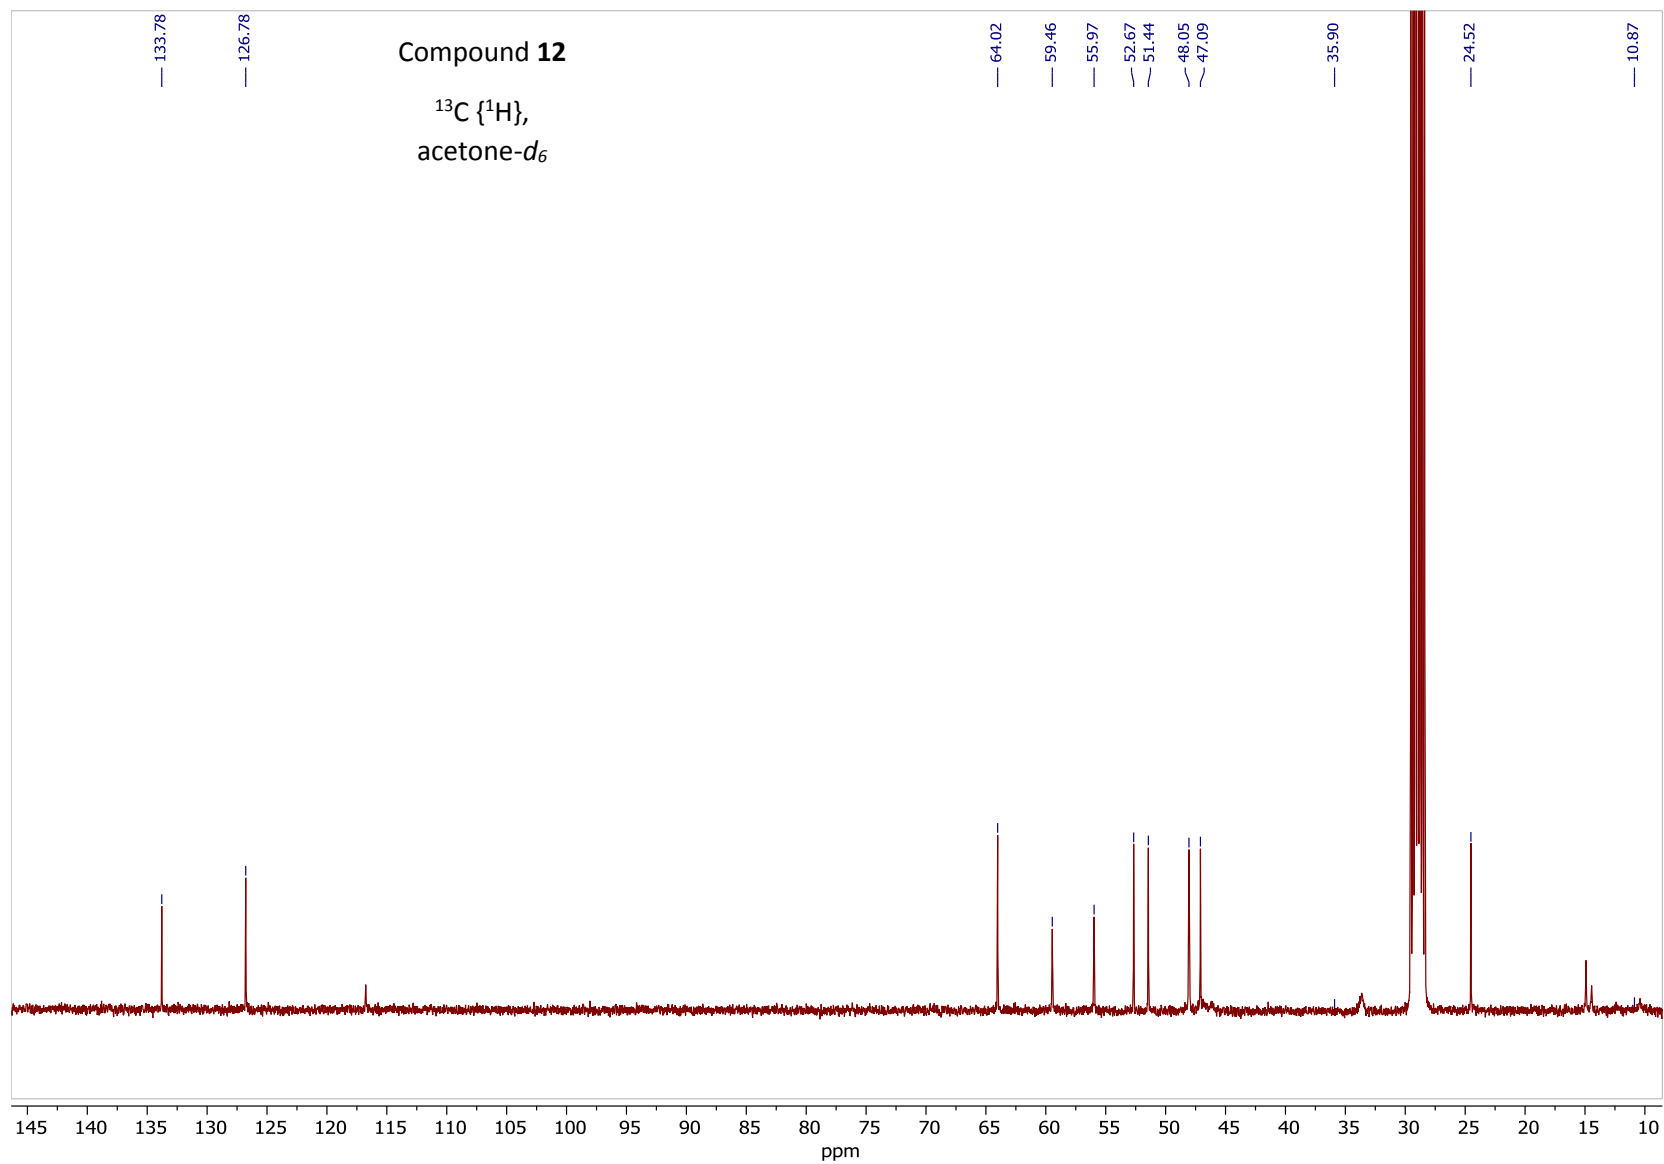

Figure S35.  $^{13}\text{C}$  NMR spectrum of compound **12**
