# Supplementary material for: Synthesis and Structure of Nido-Carboranyl Azide and Its “Click” Reactions
Source: Molecules. 2021 Jan 20;26(3):530. doi: 10.3390/molecules26030530 (PMC7930967; doi:10.3390/molecules26030530)
Supplement: Supplementary file 1 [file molecules-26-00530-s001.zip › Compound 2.cif]

 
data_a
 
_audit_creation_method            SHELXL-2014/6
_chemical_name_systematic         ?
_chemical_name_common             ?
_chemical_melting_point           ?
_chemical_formula_moiety
 'C7 H23 B9 N4'
_chemical_formula_sum
 'C7 H23 B9 N4' 
_chemical_formula_weight          260.58

loop_
 _atom_type_symbol
 _atom_type_description
 _atom_type_scat_dispersion_real
 _atom_type_scat_dispersion_imag
 _atom_type_scat_source
 'C'  'C'   0.0033   0.0016
 'International Tables Vol C Tables 4.2.6.8 and 6.1.1.4'
 'H'  'H'   0.0000   0.0000
 'International Tables Vol C Tables 4.2.6.8 and 6.1.1.4'
 'B'  'B'   0.0013   0.0007
 'International Tables Vol C Tables 4.2.6.8 and 6.1.1.4'
 'N'  'N'   0.0061   0.0033
 'International Tables Vol C Tables 4.2.6.8 and 6.1.1.4'
 
_space_group_crystal_system       monoclinic
_space_group_IT_number            14
_space_group_name_H-M_alt         'P 21/c'
_space_group_name_Hall            '-P 2ybc'
 
_shelx_space_group_comment
;
The symmetry employed for this shelxl refinement is uniquely defined
by the following loop, which should always be used as a source of
symmetry information in preference to the above space-group names.
They are only intended as comments.
;
 
loop_
 _space_group_symop_operation_xyz
 'x, y, z'
 '-x, y+1/2, -z+1/2'
 '-x, -y, -z'
 'x, -y-1/2, z-1/2'
 
_cell_length_a                    6.7746(5)
_cell_length_b                    26.5914(18)
_cell_length_c                    8.8809(6)
_cell_angle_alpha                 90
_cell_angle_beta                  111.415(2)
_cell_angle_gamma                 90
_cell_volume                      1489.41(18)
_cell_formula_units_Z             4
_cell_measurement_temperature     120(2)
_cell_measurement_reflns_used     357
_cell_measurement_theta_min       3
_cell_measurement_theta_max       25
 
_exptl_crystal_description        prism
_exptl_crystal_colour             colorless
_exptl_crystal_density_meas       ?
_exptl_crystal_density_method     ?
_exptl_crystal_density_diffrn     1.162          
_exptl_crystal_F_000              552
_exptl_transmission_factor_min    ?
_exptl_transmission_factor_max    ?
_exptl_crystal_size_max           0.276
_exptl_crystal_size_mid           0.133
_exptl_crystal_size_min           0.098
_exptl_absorpt_coefficient_mu     0.063
_shelx_estimated_absorpt_T_min    0.983
_shelx_estimated_absorpt_T_max    0.994
_exptl_absorpt_correction_type    multi-scan
_exptl_absorpt_correction_T_min   0.972
_exptl_absorpt_correction_T_max   0.999
_exptl_absorpt_process_details    'SADABS'
_exptl_absorpt_special_details    ?
_diffrn_ambient_temperature       120(2)
_diffrn_radiation_wavelength      0.71073
_diffrn_radiation_type            MoK\a
_diffrn_source                    ?
_diffrn_measurement_device_type   'Bruker APEX II CCD area detector''
_diffrn_measurement_method        'omega scans'
_diffrn_detector_area_resol_mean  ?
_diffrn_reflns_number             18241
_diffrn_reflns_av_unetI/netI      0.0477
_diffrn_reflns_av_R_equivalents   0.0517
_diffrn_reflns_limit_h_min        -9
_diffrn_reflns_limit_h_max        9
_diffrn_reflns_limit_k_min        -37
_diffrn_reflns_limit_k_max        37
_diffrn_reflns_limit_l_min        -12
_diffrn_reflns_limit_l_max        12
_diffrn_reflns_theta_min          2.580
_diffrn_reflns_theta_max          29.988
_diffrn_reflns_theta_full         25.242
_diffrn_measured_fraction_theta_max   1.000
_diffrn_measured_fraction_theta_full  0.999
_diffrn_reflns_Laue_measured_fraction_max    1.000
_diffrn_reflns_Laue_measured_fraction_full   0.999
_diffrn_reflns_point_group_measured_fraction_max   1.000
_diffrn_reflns_point_group_measured_fraction_full  0.999
_reflns_number_total              4359
_reflns_number_gt                 3133
_reflns_threshold_expression      'I>2\s(I)'
_reflns_Friedel_coverage          0.000
_reflns_Friedel_fraction_max      .
_reflns_Friedel_fraction_full     .
 
_reflns_special_details
;
 Reflections were merged by SHELXL according to the crystal
 class for the calculation of statistics and refinement.
 
 _reflns_Friedel_fraction is defined as the number of unique
 Friedel pairs measured divided by the number that would be
 possible theoretically, ignoring centric projections and
 systematic absences.
;
 
_computing_data_collection        'Bruker APEX II'
_computing_cell_refinement        'Bruker SAINT'
_computing_data_reduction         'Bruker SAINT'
_computing_structure_solution     'SHELXS-97 (Sheldrick, 1997)'
_computing_structure_refinement 'SHELXL-97 (Sheldrick, 1997)'
_computing_molecular_graphics     'Bruker SHELXTL'
_computing_publication_material   'Bruker SHELXTL'
_refine_special_details           ?
_refine_ls_structure_factor_coef  Fsqd
_refine_ls_matrix_type            full
_refine_ls_weighting_scheme       calc
_refine_ls_weighting_details
'w=1/[\s^2^(Fo^2^)+(0.0722P)^2^+0.0877P] where P=(Fo^2^+2Fc^2^)/3'
_atom_sites_solution_primary      ?
_atom_sites_solution_secondary    ?
_atom_sites_solution_hydrogens    difmap
_refine_ls_hydrogen_treatment     refall
_refine_ls_extinction_method      none
_refine_ls_extinction_coef        .
_refine_ls_number_reflns          4359
_refine_ls_number_parameters      273
_refine_ls_number_restraints      0
_refine_ls_R_factor_all           0.0751
_refine_ls_R_factor_gt            0.0461
_refine_ls_wR_factor_ref          0.1292
_refine_ls_wR_factor_gt           0.1120
_refine_ls_goodness_of_fit_ref    0.991
_refine_ls_restrained_S_all       0.991
_refine_ls_shift/su_max           0.000
_refine_ls_shift/su_mean          0.000
 
loop_
 _atom_site_label
 _atom_site_type_symbol
 _atom_site_fract_x
 _atom_site_fract_y
 _atom_site_fract_z
 _atom_site_U_iso_or_equiv
 _atom_site_adp_type
 _atom_site_occupancy
 _atom_site_site_symmetry_order  
 _atom_site_calc_flag
 _atom_site_refinement_flags_posn
 _atom_site_refinement_flags_adp
 _atom_site_refinement_flags_occupancy
 _atom_site_disorder_assembly
 _atom_site_disorder_group
N1 N 0.33020(15) 0.09662(3) 0.66129(12) 0.0166(2) Uani 1 1 d . . . . .
N2 N 0.5194(2) 0.25407(5) 0.71488(16) 0.0384(3) Uani 1 1 d . . . . .
N3 N 0.3990(2) 0.26648(4) 0.57775(17) 0.0335(3) Uani 1 1 d . . . . .
N4 N 0.2779(3) 0.28106(5) 0.46013(18) 0.0432(4) Uani 1 1 d . . . . .
C1 C 0.6814(3) 0.21601(6) 0.7172(2) 0.0345(3) Uani 1 1 d . . . . .
H1A H 0.763(3) 0.2127(7) 0.833(2) 0.047(5) Uiso 1 1 d . . . . .
H1B H 0.769(3) 0.2298(6) 0.662(2) 0.041(5) Uiso 1 1 d . . . . .
C2 C 0.5828(2) 0.16613(5) 0.64046(16) 0.0224(3) Uani 1 1 d . . . . .
H2B H 0.508(3) 0.1716(6) 0.530(2) 0.030(4) Uiso 1 1 d . . . . .
H2A H 0.695(2) 0.1437(6) 0.6508(18) 0.028(4) Uiso 1 1 d . . . . .
C3 C 0.43924(19) 0.14634(4) 0.72428(15) 0.0186(2) Uani 1 1 d . . . . .
H3B H 0.324(2) 0.1688(5) 0.7127(16) 0.016(3) Uiso 1 1 d . . . . .
H3A H 0.519(2) 0.1413(5) 0.8410(18) 0.023(4) Uiso 1 1 d . . . . .
C4 C 0.4921(2) 0.05519(5) 0.69821(16) 0.0241(3) Uani 1 1 d . . . . .
H4C H 0.581(2) 0.0613(6) 0.6354(19) 0.026(4) Uiso 1 1 d . . . . .
H4B H 0.415(2) 0.0233(6) 0.6643(18) 0.028(4) Uiso 1 1 d . . . . .
H4A H 0.576(2) 0.0556(6) 0.813(2) 0.030(4) Uiso 1 1 d . . . . .
C5 C 0.1915(2) 0.08589(5) 0.75662(16) 0.0241(3) Uani 1 1 d . . . . .
H5C H 0.086(2) 0.1133(6) 0.7320(19) 0.030(4) Uiso 1 1 d . . . . .
H5B H 0.121(2) 0.0536(6) 0.7198(18) 0.025(4) Uiso 1 1 d . . . . .
H5A H 0.285(3) 0.0848(6) 0.869(2) 0.034(4) Uiso 1 1 d . . . . .
B1 B -0.1208(2) 0.06228(5) 0.18623(17) 0.0206(3) Uani 1 1 d . . . . .
H1 H -0.247(2) 0.0354(6) 0.1223(18) 0.028(4) Uiso 1 1 d . . . . .
B2 B -0.0513(2) 0.10962(5) 0.07681(16) 0.0197(3) Uani 1 1 d . . . . .
H2 H -0.114(2) 0.1145(5) -0.0537(18) 0.025(4) Uiso 1 1 d . . . . .
B3 B 0.1316(2) 0.06151(5) 0.16595(16) 0.0193(3) Uani 1 1 d . . . . .
H3 H 0.194(2) 0.0359(6) 0.0980(18) 0.026(4) Uiso 1 1 d . . . . .
B4 B 0.1105(2) 0.04648(5) 0.35398(16) 0.0174(3) Uani 1 1 d . . . . .
H4 H 0.162(2) 0.0084(5) 0.4037(16) 0.020(3) Uiso 1 1 d . . . . .
B5 B -0.0787(2) 0.08626(5) 0.38313(16) 0.0183(3) Uani 1 1 d . . . . .
H5 H -0.181(2) 0.0756(6) 0.4546(19) 0.033(4) Uiso 1 1 d . . . . .
B6 B -0.1813(2) 0.12743(5) 0.20892(17) 0.0199(3) Uani 1 1 d . . . . .
H6 H -0.346(2) 0.1401(5) 0.1605(18) 0.027(4) Uiso 1 1 d . . . . .
C7 C 0.20501(18) 0.12352(4) 0.18747(14) 0.0173(2) Uani 1 1 d . . . . .
H7 H 0.303(2) 0.1304(6) 0.1354(18) 0.026(4) Uiso 1 1 d . . . . .
C8 C 0.29346(18) 0.09081(4) 0.34239(14) 0.0163(2) Uani 1 1 d . . . . .
H8 H 0.442(2) 0.0809(5) 0.3729(17) 0.021(4) Uiso 1 1 d . . . . .
B9 B 0.1915(2) 0.10132(5) 0.47474(15) 0.0155(2) Uani 1 1 d . . . . .
B10 B 0.0013(2) 0.15096(5) 0.39706(16) 0.0188(3) Uani 1 1 d . . . . .
H10 H -0.061(2) 0.1767(5) 0.4665(17) 0.023(4) Uiso 1 1 d . . . . .
B11 B 0.0342(2) 0.16489(5) 0.20207(16) 0.0189(3) Uani 1 1 d . . . . .
H11 H 0.010(2) 0.2010(5) 0.1405(18) 0.025(4) Uiso 1 1 d . . . . .
H1C H 0.140(2) 0.1716(6) 0.3588(19) 0.031(4) Uiso 1 1 d . . . . .
 
loop_
 _atom_site_aniso_label
 _atom_site_aniso_U_11
 _atom_site_aniso_U_22
 _atom_site_aniso_U_33
 _atom_site_aniso_U_23
 _atom_site_aniso_U_13
 _atom_site_aniso_U_12
N1 0.0164(5) 0.0165(4) 0.0155(5) -0.0001(3) 0.0043(4) -0.0007(4)
N2 0.0594(9) 0.0238(6) 0.0369(7) -0.0049(5) 0.0233(6) -0.0095(6)
N3 0.0527(8) 0.0181(5) 0.0422(8) -0.0027(5) 0.0323(7) -0.0043(5)
N4 0.0637(10) 0.0323(7) 0.0460(8) 0.0032(6) 0.0350(8) 0.0077(6)
C1 0.0332(8) 0.0308(7) 0.0375(8) -0.0045(6) 0.0105(7) -0.0143(6)
C2 0.0175(6) 0.0235(6) 0.0253(7) 0.0007(5) 0.0067(5) -0.0018(5)
C3 0.0177(5) 0.0173(5) 0.0185(6) -0.0031(4) 0.0040(4) -0.0024(4)
C4 0.0246(6) 0.0201(6) 0.0207(6) 0.0009(5) -0.0001(5) 0.0059(5)
C5 0.0261(6) 0.0295(7) 0.0179(6) 0.0004(5) 0.0094(5) -0.0061(5)
B1 0.0159(6) 0.0240(6) 0.0185(6) 0.0004(5) 0.0025(5) -0.0031(5)
B2 0.0153(6) 0.0243(6) 0.0165(6) 0.0014(5) 0.0023(5) 0.0005(5)
B3 0.0185(6) 0.0203(6) 0.0167(6) -0.0026(5) 0.0035(5) 0.0006(5)
B4 0.0158(6) 0.0174(6) 0.0167(6) -0.0006(5) 0.0031(5) -0.0017(5)
B5 0.0130(6) 0.0218(6) 0.0195(6) 0.0015(5) 0.0050(5) -0.0009(5)
B6 0.0134(6) 0.0247(6) 0.0202(6) 0.0032(5) 0.0046(5) 0.0027(5)
C7 0.0139(5) 0.0212(6) 0.0166(5) 0.0020(4) 0.0054(4) 0.0001(4)
C8 0.0119(5) 0.0188(5) 0.0166(5) 0.0004(4) 0.0033(4) 0.0009(4)
B9 0.0132(5) 0.0170(6) 0.0150(6) 0.0014(4) 0.0034(5) 0.0008(4)
B10 0.0178(6) 0.0202(6) 0.0192(6) 0.0012(5) 0.0075(5) 0.0023(5)
B11 0.0173(6) 0.0195(6) 0.0202(6) 0.0023(5) 0.0070(5) 0.0023(5)
 
_geom_special_details
;
 All esds (except the esd in the dihedral angle between two l.s. planes)
 are estimated using the full covariance matrix.  The cell esds are taken
 into account individually in the estimation of esds in distances, angles
 and torsion angles; correlations between esds in cell parameters are only
 used when they are defined by crystal symmetry.  An approximate (isotropic)
 treatment of cell esds is used for estimating esds involving l.s. planes.
;
 
loop_
 _geom_bond_atom_site_label_1
 _geom_bond_atom_site_label_2
 _geom_bond_distance
 _geom_bond_site_symmetry_2
 _geom_bond_publ_flag
N1 C4 1.5037(15) . ?
N1 C5 1.5040(17) . ?
N1 C3 1.5183(14) . ?
N1 B9 1.5831(16) . ?
N2 N3 1.2378(19) . ?
N2 C1 1.488(2) . ?
N3 N4 1.1352(19) . ?
C1 C2 1.5289(18) . ?
C1 H1A 0.98(2) . ?
C1 H1B 0.969(18) . ?
C2 C3 1.5183(18) . ?
C2 H2B 0.939(16) . ?
C2 H2A 0.946(16) . ?
C3 H3B 0.958(14) . ?
C3 H3A 0.989(15) . ?
C4 H4C 0.972(16) . ?
C4 H4B 0.983(16) . ?
C4 H4A 0.966(16) . ?
C5 H5C 0.986(16) . ?
C5 H5B 0.979(15) . ?
C5 H5A 0.969(17) . ?
B1 B2 1.756(2) . ?
B1 B4 1.7740(18) . ?
B1 B5 1.784(2) . ?
B1 B3 1.784(2) . ?
B1 B6 1.808(2) . ?
B1 H1 1.101(15) . ?
B2 C7 1.6946(17) . ?
B2 B3 1.7556(19) . ?
B2 B6 1.769(2) . ?
B2 B11 1.8063(19) . ?
B2 H2 1.087(14) . ?
B3 C7 1.7126(18) . ?
B3 C8 1.7349(17) . ?
B3 B4 1.773(2) . ?
B3 H3 1.092(15) . ?
B4 C8 1.7405(18) . ?
B4 B5 1.7524(19) . ?
B4 B9 1.7743(18) . ?
B4 H4 1.110(14) . ?
B5 B9 1.7565(18) . ?
B5 B10 1.7943(19) . ?
B5 B6 1.8138(19) . ?
B5 H5 1.135(16) . ?
B6 B11 1.786(2) . ?
B6 B10 1.7900(19) . ?
B6 H6 1.095(15) . ?
C7 C8 1.5513(16) . ?
C7 B11 1.6360(18) . ?
C7 H7 0.958(16) . ?
C8 B9 1.5903(18) . ?
C8 H8 0.976(14) . ?
B9 B10 1.7972(18) . ?
B10 B11 1.862(2) . ?
B10 H10 1.102(15) . ?
B10 H1C 1.237(16) . ?
B11 H11 1.088(14) . ?
B11 H1C 1.325(15) . ?
 
loop_
 _geom_angle_atom_site_label_1
 _geom_angle_atom_site_label_2
 _geom_angle_atom_site_label_3
 _geom_angle
 _geom_angle_site_symmetry_1
 _geom_angle_site_symmetry_3
 _geom_angle_publ_flag
C4 N1 C5 107.11(10) . . ?
C4 N1 C3 109.86(9) . . ?
C5 N1 C3 106.12(9) . . ?
C4 N1 B9 113.14(9) . . ?
C5 N1 B9 110.49(9) . . ?
C3 N1 B9 109.86(9) . . ?
N3 N2 C1 114.38(13) . . ?
N4 N3 N2 172.60(15) . . ?
N2 C1 C2 112.57(12) . . ?
N2 C1 H1A 101.9(11) . . ?
C2 C1 H1A 112.2(11) . . ?
N2 C1 H1B 108.7(10) . . ?
C2 C1 H1B 110.8(11) . . ?
H1A C1 H1B 110.4(15) . . ?
C3 C2 C1 109.65(12) . . ?
C3 C2 H2B 111.7(10) . . ?
C1 C2 H2B 108.3(10) . . ?
C3 C2 H2A 111.8(9) . . ?
C1 C2 H2A 107.4(9) . . ?
H2B C2 H2A 107.9(13) . . ?
C2 C3 N1 115.70(10) . . ?
C2 C3 H3B 111.9(8) . . ?
N1 C3 H3B 103.7(8) . . ?
C2 C3 H3A 110.9(8) . . ?
N1 C3 H3A 106.0(8) . . ?
H3B C3 H3A 108.2(11) . . ?
N1 C4 H4C 107.9(9) . . ?
N1 C4 H4B 107.5(9) . . ?
H4C C4 H4B 109.8(13) . . ?
N1 C4 H4A 108.8(9) . . ?
H4C C4 H4A 110.6(13) . . ?
H4B C4 H4A 112.0(13) . . ?
N1 C5 H5C 106.5(9) . . ?
N1 C5 H5B 108.0(9) . . ?
H5C C5 H5B 110.3(12) . . ?
N1 C5 H5A 106.4(10) . . ?
H5C C5 H5A 113.4(13) . . ?
H5B C5 H5A 111.9(13) . . ?
B2 B1 B4 107.53(9) . . ?
B2 B1 B5 107.86(10) . . ?
B4 B1 B5 59.02(7) . . ?
B2 B1 B3 59.45(8) . . ?
B4 B1 B3 59.77(8) . . ?
B5 B1 B3 106.66(9) . . ?
B2 B1 B6 59.50(8) . . ?
B4 B1 B6 107.45(9) . . ?
B5 B1 B6 60.65(8) . . ?
B3 B1 B6 106.66(9) . . ?
B2 B1 H1 119.7(8) . . ?
B4 B1 H1 124.2(8) . . ?
B5 B1 H1 123.6(8) . . ?
B3 B1 H1 122.4(8) . . ?
B6 B1 H1 120.9(8) . . ?
C7 B2 B3 59.49(7) . . ?
C7 B2 B1 105.10(9) . . ?
B3 B2 B1 61.05(8) . . ?
C7 B2 B6 102.11(9) . . ?
B3 B2 B6 109.65(10) . . ?
B1 B2 B6 61.71(8) . . ?
C7 B2 B11 55.61(7) . . ?
B3 B2 B11 107.48(9) . . ?
B1 B2 B11 109.44(10) . . ?
B6 B2 B11 59.94(8) . . ?
C7 B2 H2 120.9(8) . . ?
B3 B2 H2 120.4(8) . . ?
B1 B2 H2 126.6(8) . . ?
B6 B2 H2 125.3(8) . . ?
B11 B2 H2 118.2(8) . . ?
C7 B3 C8 53.48(7) . . ?
C7 B3 B2 58.48(7) . . ?
C8 B3 B2 100.92(9) . . ?
C7 B3 B4 103.41(9) . . ?
C8 B3 B4 59.48(7) . . ?
B2 B3 B4 107.62(10) . . ?
C7 B3 B1 103.17(9) . . ?
C8 B3 B1 102.52(9) . . ?
B2 B3 B1 59.50(8) . . ?
B4 B3 B1 59.84(8) . . ?
C7 B3 H3 120.4(8) . . ?
C8 B3 H3 122.3(7) . . ?
B2 B3 H3 123.8(8) . . ?
B4 B3 H3 124.1(8) . . ?
B1 B3 H3 129.9(8) . . ?
C8 B4 B5 100.07(9) . . ?
C8 B4 B3 59.17(7) . . ?
B5 B4 B3 108.53(9) . . ?
C8 B4 B1 102.70(9) . . ?
B5 B4 B1 60.77(8) . . ?
B3 B4 B1 60.39(8) . . ?
C8 B4 B9 53.80(7) . . ?
B5 B4 B9 59.74(7) . . ?
B3 B4 B9 105.70(9) . . ?
B1 B4 B9 107.25(9) . . ?
C8 B4 H4 121.0(7) . . ?
B5 B4 H4 129.3(7) . . ?
B3 B4 H4 117.3(7) . . ?
B1 B4 H4 127.1(7) . . ?
B9 B4 H4 121.8(7) . . ?
B4 B5 B9 60.75(7) . . ?
B4 B5 B1 60.22(8) . . ?
B9 B5 B1 107.60(9) . . ?
B4 B5 B10 111.74(9) . . ?
B9 B5 B10 60.80(7) . . ?
B1 B5 B10 110.29(10) . . ?
B4 B5 B6 108.15(10) . . ?
B9 B5 B6 105.52(9) . . ?
B1 B5 B6 60.35(8) . . ?
B10 B5 B6 59.48(7) . . ?
B4 B5 H5 124.2(8) . . ?
B9 B5 H5 123.0(8) . . ?
B1 B5 H5 123.2(8) . . ?
B10 B5 H5 115.6(8) . . ?
B6 B5 H5 120.4(8) . . ?
B2 B6 B11 61.06(8) . . ?
B2 B6 B10 111.77(9) . . ?
B11 B6 B10 62.75(8) . . ?
B2 B6 B1 58.79(8) . . ?
B11 B6 B1 108.02(9) . . ?
B10 B6 B1 109.36(9) . . ?
B2 B6 B5 105.99(9) . . ?
B11 B6 B5 107.58(9) . . ?
B10 B6 B5 59.72(7) . . ?
B1 B6 B5 59.00(8) . . ?
B2 B6 H6 120.4(8) . . ?
B11 B6 H6 123.1(8) . . ?
B10 B6 H6 121.2(8) . . ?
B1 B6 H6 119.4(8) . . ?
B5 B6 H6 122.6(8) . . ?
C8 C7 B11 111.23(10) . . ?
C8 C7 B2 111.98(9) . . ?
B11 C7 B2 65.66(8) . . ?
C8 C7 B3 64.00(8) . . ?
B11 C7 B3 118.11(10) . . ?
B2 C7 B3 62.03(8) . . ?
C8 C7 H7 115.1(9) . . ?
B11 C7 H7 123.2(9) . . ?
B2 C7 H7 120.6(9) . . ?
B3 C7 H7 110.8(9) . . ?
C7 C8 B9 115.19(9) . . ?
C7 C8 B3 62.52(8) . . ?
B9 C8 B3 116.40(9) . . ?
C7 C8 B4 112.29(9) . . ?
B9 C8 B4 64.19(8) . . ?
B3 C8 B4 61.34(7) . . ?
C7 C8 H8 115.0(8) . . ?
B9 C8 H8 121.5(9) . . ?
B3 C8 H8 112.2(8) . . ?
B4 C8 H8 119.0(8) . . ?
N1 B9 C8 120.51(9) . . ?
N1 B9 B5 125.91(10) . . ?
C8 B9 B5 106.13(9) . . ?
N1 B9 B4 120.13(9) . . ?
C8 B9 B4 62.02(8) . . ?
B5 B9 B4 59.51(7) . . ?
N1 B9 B10 121.88(10) . . ?
C8 B9 B10 106.82(9) . . ?
B5 B9 B10 60.64(7) . . ?
B4 B9 B10 110.57(9) . . ?
B6 B10 B5 60.80(8) . . ?
B6 B10 B9 104.82(9) . . ?
B5 B10 B9 58.56(7) . . ?
B6 B10 B11 58.53(7) . . ?
B5 B10 B11 105.20(9) . . ?
B9 B10 B11 100.99(9) . . ?
B6 B10 H10 117.6(7) . . ?
B5 B10 H10 117.8(8) . . ?
B9 B10 H10 127.5(7) . . ?
B11 B10 H10 126.6(8) . . ?
B6 B10 H1C 103.5(7) . . ?
B5 B10 H1C 130.3(7) . . ?
B9 B10 H1C 85.5(7) . . ?
B11 B10 H1C 45.3(7) . . ?
H10 B10 H1C 111.2(11) . . ?
C7 B11 B6 103.78(10) . . ?
C7 B11 B2 58.73(7) . . ?
B6 B11 B2 59.01(8) . . ?
C7 B11 B10 105.56(9) . . ?
B6 B11 B10 58.72(7) . . ?
B2 B11 B10 106.89(9) . . ?
C7 B11 H11 122.3(8) . . ?
B6 B11 H11 122.4(8) . . ?
B2 B11 H11 117.0(8) . . ?
B10 B11 H11 126.6(8) . . ?
C7 B11 H1C 92.7(7) . . ?
B6 B11 H1C 100.0(7) . . ?
B2 B11 H1C 133.3(7) . . ?
B10 B11 H1C 41.6(7) . . ?
H11 B11 H1C 109.5(10) . . ?
 
loop_
 _geom_torsion_atom_site_label_1
 _geom_torsion_atom_site_label_2
 _geom_torsion_atom_site_label_3
 _geom_torsion_atom_site_label_4
 _geom_torsion
 _geom_torsion_site_symmetry_1
 _geom_torsion_site_symmetry_2
 _geom_torsion_site_symmetry_3
 _geom_torsion_site_symmetry_4
 _geom_torsion_publ_flag
N3 N2 C1 C2 -62.44(17) . . . . ?
N2 C1 C2 C3 -55.85(16) . . . . ?
C1 C2 C3 N1 -179.74(11) . . . . ?
C4 N1 C3 C2 66.85(13) . . . . ?
C5 N1 C3 C2 -177.69(10) . . . . ?
B9 N1 C3 C2 -58.23(13) . . . . ?
B4 B1 B2 C7 -4.48(13) . . . . ?
B5 B1 B2 C7 57.79(12) . . . . ?
B3 B1 B2 C7 -41.40(9) . . . . ?
B6 B1 B2 C7 95.83(10) . . . . ?
B4 B1 B2 B3 36.92(9) . . . . ?
B5 B1 B2 B3 99.18(10) . . . . ?
B6 B1 B2 B3 137.22(10) . . . . ?
B4 B1 B2 B6 -100.30(10) . . . . ?
B5 B1 B2 B6 -38.04(9) . . . . ?
B3 B1 B2 B6 -137.22(10) . . . . ?
B4 B1 B2 B11 -62.80(12) . . . . ?
B5 B1 B2 B11 -0.53(12) . . . . ?
B3 B1 B2 B11 -99.72(10) . . . . ?
B6 B1 B2 B11 37.51(9) . . . . ?
B1 B2 B3 C7 -132.18(10) . . . . ?
B6 B2 B3 C7 -92.76(10) . . . . ?
B11 B2 B3 C7 -29.20(9) . . . . ?
C7 B2 B3 C8 33.98(8) . . . . ?
B1 B2 B3 C8 -98.20(10) . . . . ?
B6 B2 B3 C8 -58.78(11) . . . . ?
B11 B2 B3 C8 4.78(12) . . . . ?
C7 B2 B3 B4 95.21(10) . . . . ?
B1 B2 B3 B4 -36.97(9) . . . . ?
B6 B2 B3 B4 2.45(13) . . . . ?
B11 B2 B3 B4 66.01(12) . . . . ?
C7 B2 B3 B1 132.18(10) . . . . ?
B6 B2 B3 B1 39.42(9) . . . . ?
B11 B2 B3 B1 102.98(10) . . . . ?
B2 B1 B3 C7 40.45(8) . . . . ?
B4 B1 B3 C7 -98.02(9) . . . . ?
B5 B1 B3 C7 -60.80(11) . . . . ?
B6 B1 B3 C7 2.81(12) . . . . ?
B2 B1 B3 C8 95.41(10) . . . . ?
B4 B1 B3 C8 -43.06(8) . . . . ?
B5 B1 B3 C8 -5.84(12) . . . . ?
B6 B1 B3 C8 57.77(11) . . . . ?
B4 B1 B3 B2 -138.47(10) . . . . ?
B5 B1 B3 B2 -101.25(10) . . . . ?
B6 B1 B3 B2 -37.65(9) . . . . ?
B2 B1 B3 B4 138.47(10) . . . . ?
B5 B1 B3 B4 37.22(9) . . . . ?
B6 B1 B3 B4 100.83(10) . . . . ?
C7 B3 B4 C8 -31.71(8) . . . . ?
B2 B3 B4 C8 -92.49(10) . . . . ?
B1 B3 B4 C8 -129.31(9) . . . . ?
C7 B3 B4 B5 59.14(11) . . . . ?
C8 B3 B4 B5 90.85(9) . . . . ?
B2 B3 B4 B5 -1.65(12) . . . . ?
B1 B3 B4 B5 -38.47(9) . . . . ?
C7 B3 B4 B1 97.60(10) . . . . ?
C8 B3 B4 B1 129.31(9) . . . . ?
B2 B3 B4 B1 36.82(9) . . . . ?
C7 B3 B4 B9 -3.61(11) . . . . ?
C8 B3 B4 B9 28.10(8) . . . . ?
B2 B3 B4 B9 -64.40(11) . . . . ?
B1 B3 B4 B9 -101.22(10) . . . . ?
B2 B1 B4 C8 6.15(12) . . . . ?
B5 B1 B4 C8 -94.55(9) . . . . ?
B3 B1 B4 C8 42.93(8) . . . . ?
B6 B1 B4 C8 -56.55(11) . . . . ?
B2 B1 B4 B5 100.70(11) . . . . ?
B3 B1 B4 B5 137.48(10) . . . . ?
B6 B1 B4 B5 38.00(9) . . . . ?
B2 B1 B4 B3 -36.78(9) . . . . ?
B5 B1 B4 B3 -137.48(10) . . . . ?
B6 B1 B4 B3 -99.48(10) . . . . ?
B2 B1 B4 B9 61.81(12) . . . . ?
B5 B1 B4 B9 -38.89(9) . . . . ?
B3 B1 B4 B9 98.59(10) . . . . ?
B6 B1 B4 B9 -0.88(13) . . . . ?
C8 B4 B5 B9 -37.04(8) . . . . ?
B3 B4 B5 B9 -97.74(10) . . . . ?
B1 B4 B5 B9 -136.04(10) . . . . ?
C8 B4 B5 B1 99.00(9) . . . . ?
B3 B4 B5 B1 38.30(9) . . . . ?
B9 B4 B5 B1 136.04(10) . . . . ?
C8 B4 B5 B10 -2.65(12) . . . . ?
B3 B4 B5 B10 -63.35(12) . . . . ?
B1 B4 B5 B10 -101.65(10) . . . . ?
B9 B4 B5 B10 34.40(9) . . . . ?
C8 B4 B5 B6 60.96(10) . . . . ?
B3 B4 B5 B6 0.26(12) . . . . ?
B1 B4 B5 B6 -38.04(9) . . . . ?
B9 B4 B5 B6 98.00(10) . . . . ?
B2 B1 B5 B4 -100.11(10) . . . . ?
B3 B1 B5 B4 -37.56(9) . . . . ?
B6 B1 B5 B4 -137.64(10) . . . . ?
B2 B1 B5 B9 -60.67(11) . . . . ?
B4 B1 B5 B9 39.45(9) . . . . ?
B3 B1 B5 B9 1.88(12) . . . . ?
B6 B1 B5 B9 -98.19(10) . . . . ?
B2 B1 B5 B10 3.97(12) . . . . ?
B4 B1 B5 B10 104.08(10) . . . . ?
B3 B1 B5 B10 66.52(11) . . . . ?
B6 B1 B5 B10 -33.55(9) . . . . ?
B2 B1 B5 B6 37.53(9) . . . . ?
B4 B1 B5 B6 137.64(10) . . . . ?
B3 B1 B5 B6 100.08(10) . . . . ?
C7 B2 B6 B11 37.66(8) . . . . ?
B3 B2 B6 B11 99.32(10) . . . . ?
B1 B2 B6 B11 138.44(9) . . . . ?
C7 B2 B6 B10 -0.68(12) . . . . ?
B3 B2 B6 B10 60.97(12) . . . . ?
B1 B2 B6 B10 100.10(10) . . . . ?
B11 B2 B6 B10 -38.34(9) . . . . ?
C7 B2 B6 B1 -100.78(9) . . . . ?
B3 B2 B6 B1 -39.13(9) . . . . ?
B11 B2 B6 B1 -138.44(9) . . . . ?
C7 B2 B6 B5 -63.91(11) . . . . ?
B3 B2 B6 B5 -2.26(12) . . . . ?
B1 B2 B6 B5 36.87(8) . . . . ?
B11 B2 B6 B5 -101.57(9) . . . . ?
B4 B1 B6 B2 100.44(10) . . . . ?
B5 B1 B6 B2 137.71(9) . . . . ?
B3 B1 B6 B2 37.62(9) . . . . ?
B2 B1 B6 B11 -37.62(9) . . . . ?
B4 B1 B6 B11 62.82(12) . . . . ?
B5 B1 B6 B11 100.09(10) . . . . ?
B3 B1 B6 B11 0.00(12) . . . . ?
B2 B1 B6 B10 -104.29(10) . . . . ?
B4 B1 B6 B10 -3.85(13) . . . . ?
B5 B1 B6 B10 33.42(9) . . . . ?
B3 B1 B6 B10 -66.66(12) . . . . ?
B2 B1 B6 B5 -137.71(9) . . . . ?
B4 B1 B6 B5 -37.27(9) . . . . ?
B3 B1 B6 B5 -100.09(10) . . . . ?
B4 B5 B6 B2 1.21(12) . . . . ?
B9 B5 B6 B2 64.94(11) . . . . ?
B1 B5 B6 B2 -36.77(9) . . . . ?
B10 B5 B6 B2 106.23(10) . . . . ?
B4 B5 B6 B11 -62.86(11) . . . . ?
B9 B5 B6 B11 0.87(12) . . . . ?
B1 B5 B6 B11 -100.84(10) . . . . ?
B10 B5 B6 B11 42.16(9) . . . . ?
B4 B5 B6 B10 -105.02(10) . . . . ?
B9 B5 B6 B10 -41.29(9) . . . . ?
B1 B5 B6 B10 -143.00(10) . . . . ?
B4 B5 B6 B1 37.98(9) . . . . ?
B9 B5 B6 B1 101.71(10) . . . . ?
B10 B5 B6 B1 143.00(10) . . . . ?
B3 B2 C7 C8 -41.44(10) . . . . ?
B1 B2 C7 C8 0.76(13) . . . . ?
B6 B2 C7 C8 64.39(12) . . . . ?
B11 B2 C7 C8 104.24(11) . . . . ?
B3 B2 C7 B11 -145.68(10) . . . . ?
B1 B2 C7 B11 -103.48(11) . . . . ?
B6 B2 C7 B11 -39.85(9) . . . . ?
B1 B2 C7 B3 42.19(9) . . . . ?
B6 B2 C7 B3 105.83(10) . . . . ?
B11 B2 C7 B3 145.68(10) . . . . ?
B2 B3 C7 C8 136.93(10) . . . . ?
B4 B3 C7 C8 34.29(8) . . . . ?
B1 B3 C7 C8 95.96(10) . . . . ?
C8 B3 C7 B11 -101.31(11) . . . . ?
B2 B3 C7 B11 35.62(10) . . . . ?
B4 B3 C7 B11 -67.02(12) . . . . ?
B1 B3 C7 B11 -5.35(13) . . . . ?
C8 B3 C7 B2 -136.93(10) . . . . ?
B4 B3 C7 B2 -102.64(10) . . . . ?
B1 B3 C7 B2 -40.98(9) . . . . ?
B11 C7 C8 B9 3.89(13) . . . . ?
B2 C7 C8 B9 -67.45(13) . . . . ?
B3 C7 C8 B9 -108.01(11) . . . . ?
B11 C7 C8 B3 111.90(10) . . . . ?
B2 C7 C8 B3 40.57(9) . . . . ?
B11 C7 C8 B4 74.79(12) . . . . ?
B2 C7 C8 B4 3.46(13) . . . . ?
B3 C7 C8 B4 -37.11(9) . . . . ?
B2 B3 C8 C7 -36.36(9) . . . . ?
B4 B3 C8 C7 -140.49(10) . . . . ?
B1 B3 C8 C7 -97.24(10) . . . . ?
C7 B3 C8 B9 106.11(11) . . . . ?
B2 B3 C8 B9 69.75(12) . . . . ?
B4 B3 C8 B9 -34.38(10) . . . . ?
B1 B3 C8 B9 8.87(13) . . . . ?
C7 B3 C8 B4 140.49(10) . . . . ?
B2 B3 C8 B4 104.13(10) . . . . ?
B1 B3 C8 B4 43.25(8) . . . . ?
B5 B4 C8 C7 -68.07(11) . . . . ?
B3 B4 C8 C7 37.59(9) . . . . ?
B1 B4 C8 C7 -6.00(12) . . . . ?
B9 B4 C8 C7 -108.22(10) . . . . ?
B5 B4 C8 B9 40.15(8) . . . . ?
B3 B4 C8 B9 145.81(10) . . . . ?
B1 B4 C8 B9 102.22(10) . . . . ?
B5 B4 C8 B3 -105.66(9) . . . . ?
B1 B4 C8 B3 -43.59(9) . . . . ?
B9 B4 C8 B3 -145.81(10) . . . . ?
C4 N1 B9 C8 -35.38(14) . . . . ?
C5 N1 B9 C8 -155.46(11) . . . . ?
C3 N1 B9 C8 87.79(12) . . . . ?
C4 N1 B9 B5 110.21(13) . . . . ?
C5 N1 B9 B5 -9.87(15) . . . . ?
C3 N1 B9 B5 -126.62(12) . . . . ?
C4 N1 B9 B4 37.90(14) . . . . ?
C5 N1 B9 B4 -82.18(13) . . . . ?
C3 N1 B9 B4 161.07(10) . . . . ?
C4 N1 B9 B10 -175.01(10) . . . . ?
C5 N1 B9 B10 64.90(13) . . . . ?
C3 N1 B9 B10 -51.84(13) . . . . ?
C7 C8 B9 N1 -145.93(10) . . . . ?
B3 C8 B9 N1 143.69(10) . . . . ?
B4 C8 B9 N1 110.29(11) . . . . ?
C7 C8 B9 B5 62.53(12) . . . . ?
B3 C8 B9 B5 -7.86(13) . . . . ?
B4 C8 B9 B5 -41.25(8) . . . . ?
C7 C8 B9 B4 103.78(10) . . . . ?
B3 C8 B9 B4 33.40(9) . . . . ?
C7 C8 B9 B10 -1.00(13) . . . . ?
B3 C8 B9 B10 -71.38(12) . . . . ?
B4 C8 B9 B10 -104.78(9) . . . . ?
B4 B5 B9 N1 -107.03(12) . . . . ?
B1 B5 B9 N1 -146.23(11) . . . . ?
B10 B5 B9 N1 109.92(12) . . . . ?
B6 B5 B9 N1 150.55(11) . . . . ?
B4 B5 B9 C8 42.51(9) . . . . ?
B1 B5 B9 C8 3.31(12) . . . . ?
B10 B5 B9 C8 -100.54(10) . . . . ?
B6 B5 B9 C8 -59.91(11) . . . . ?
B1 B5 B9 B4 -39.20(9) . . . . ?
B10 B5 B9 B4 -143.05(10) . . . . ?
B6 B5 B9 B4 -102.42(10) . . . . ?
B4 B5 B9 B10 143.05(10) . . . . ?
B1 B5 B9 B10 103.85(10) . . . . ?
B6 B5 B9 B10 40.63(9) . . . . ?
C8 B4 B9 N1 -110.87(11) . . . . ?
B5 B4 B9 N1 116.44(12) . . . . ?
B3 B4 B9 N1 -140.95(10) . . . . ?
B1 B4 B9 N1 155.80(10) . . . . ?
B5 B4 B9 C8 -132.69(10) . . . . ?
B3 B4 B9 C8 -30.08(8) . . . . ?
B1 B4 B9 C8 -93.33(10) . . . . ?
C8 B4 B9 B5 132.69(9) . . . . ?
B3 B4 B9 B5 102.61(10) . . . . ?
B1 B4 B9 B5 39.36(9) . . . . ?
C8 B4 B9 B10 98.66(10) . . . . ?
B5 B4 B9 B10 -34.03(9) . . . . ?
B3 B4 B9 B10 68.58(11) . . . . ?
B1 B4 B9 B10 5.33(13) . . . . ?
B2 B6 B10 B5 -96.33(10) . . . . ?
B11 B6 B10 B5 -133.97(10) . . . . ?
B1 B6 B10 B5 -33.14(9) . . . . ?
B2 B6 B10 B9 -56.33(12) . . . . ?
B11 B6 B10 B9 -93.97(10) . . . . ?
B1 B6 B10 B9 6.85(12) . . . . ?
B5 B6 B10 B9 40.00(8) . . . . ?
B2 B6 B10 B11 37.64(9) . . . . ?
B1 B6 B10 B11 100.82(10) . . . . ?
B5 B6 B10 B11 133.97(10) . . . . ?
B4 B5 B10 B6 98.88(10) . . . . ?
B9 B5 B10 B6 133.25(10) . . . . ?
B1 B5 B10 B6 33.89(9) . . . . ?
B4 B5 B10 B9 -34.38(9) . . . . ?
B1 B5 B10 B9 -99.37(10) . . . . ?
B6 B5 B10 B9 -133.25(10) . . . . ?
B4 B5 B10 B11 59.37(11) . . . . ?
B9 B5 B10 B11 93.75(9) . . . . ?
B1 B5 B10 B11 -5.62(12) . . . . ?
B6 B5 B10 B11 -39.50(8) . . . . ?
N1 B9 B10 B6 -157.40(10) . . . . ?
C8 B9 B10 B6 58.26(11) . . . . ?
B5 B9 B10 B6 -41.12(9) . . . . ?
B4 B9 B10 B6 -7.53(12) . . . . ?
N1 B9 B10 B5 -116.27(12) . . . . ?
C8 B9 B10 B5 99.38(10) . . . . ?
B4 B9 B10 B5 33.59(9) . . . . ?
N1 B9 B10 B11 142.52(10) . . . . ?
C8 B9 B10 B11 -1.83(11) . . . . ?
B5 B9 B10 B11 -101.21(9) . . . . ?
B4 B9 B10 B11 -67.61(11) . . . . ?
C8 C7 B11 B6 -65.65(11) . . . . ?
B2 C7 B11 B6 39.71(9) . . . . ?
B3 C7 B11 B6 5.34(13) . . . . ?
C8 C7 B11 B2 -105.36(10) . . . . ?
B3 C7 B11 B2 -34.37(10) . . . . ?
C8 C7 B11 B10 -4.77(12) . . . . ?
B2 C7 B11 B10 100.59(10) . . . . ?
B3 C7 B11 B10 66.22(12) . . . . ?
B2 B6 B11 C7 -39.58(8) . . . . ?
B10 B6 B11 C7 100.03(9) . . . . ?
B1 B6 B11 C7 -2.95(12) . . . . ?
B5 B6 B11 C7 59.34(11) . . . . ?
B10 B6 B11 B2 139.61(9) . . . . ?
B1 B6 B11 B2 36.63(9) . . . . ?
B5 B6 B11 B2 98.92(10) . . . . ?
B2 B6 B11 B10 -139.61(9) . . . . ?
B1 B6 B11 B10 -102.98(10) . . . . ?
B5 B6 B11 B10 -40.69(9) . . . . ?
B3 B2 B11 C7 30.62(9) . . . . ?
B1 B2 B11 C7 95.34(10) . . . . ?
B6 B2 B11 C7 133.62(10) . . . . ?
C7 B2 B11 B6 -133.62(10) . . . . ?
B3 B2 B11 B6 -103.00(10) . . . . ?
B1 B2 B11 B6 -38.28(9) . . . . ?
C7 B2 B11 B10 -98.25(10) . . . . ?
B3 B2 B11 B10 -67.64(11) . . . . ?
B1 B2 B11 B10 -2.91(12) . . . . ?
B6 B2 B11 B10 35.37(8) . . . . ?
B6 B10 B11 C7 -96.90(10) . . . . ?
B5 B10 B11 C7 -56.28(11) . . . . ?
B9 B10 B11 C7 3.86(11) . . . . ?
B5 B10 B11 B6 40.62(9) . . . . ?
B9 B10 B11 B6 100.76(9) . . . . ?
B6 B10 B11 B2 -35.49(9) . . . . ?
B5 B10 B11 B2 5.13(11) . . . . ?
B9 B10 B11 B2 65.27(10) . . . . ?
 
_refine_diff_density_max    0.321
_refine_diff_density_min   -0.178
_refine_diff_density_rms    0.044

_publ_section_references 
;
Bruker, Programs APEX II, version 2.0-1; SAINT, version 7.23A;
SADABS, version 2004/1; XPREP, version 2005/2;
SHELXTL, version 6.1. Bruker AXS Inc., Madison, WI, USA, 2005.

G.M. Sheldrick, Programs SHELXS97 (crystal structure solution)
and SHELXL97 (crystal structure refinement), University  of
Gottingen, Germany, 1997.
;

_shelxl_version_number 2014/6

_shelx_res_file
;
TITL a in P2(1)/c
CELL 0.71073   6.7746  26.5914   8.8809  90.000 111.415  90.000
ZERR    4.00   0.0005   0.0018   0.0006   0.000   0.002   0.000
LATT  1
SYMM -X, 0.5+Y, 0.5-Z
SFAC C H B N
UNIT 28 92 36 16
omit -4 60
omit     0   2   0
omit     1   0   0

TEMP -153.000
size 0.276 0.133 0.098

acta
conf
htab
BOND $h

L.S. 8
FMAP 2
PLAN 20

WGHT    0.072200    0.087700
FVAR       0.23257
N1    4    0.330202    0.096615    0.661289    11.00000    0.01643    0.01649 =
         0.01555   -0.00009    0.00428   -0.00070
N2    4    0.519379    0.254065    0.714885    11.00000    0.05938    0.02376 =
         0.03693   -0.00495    0.02328   -0.00949
N3    4    0.398965    0.266483    0.577750    11.00000    0.05272    0.01813 =
         0.04218   -0.00271    0.03226   -0.00430
N4    4    0.277852    0.281057    0.460132    11.00000    0.06373    0.03232 =
         0.04604    0.00315    0.03503    0.00768
C1    1    0.681416    0.216010    0.717157    11.00000    0.03316    0.03077 =
         0.03752   -0.00451    0.01045   -0.01432
H1A   2    0.762604    0.212690    0.832729    11.00000    0.04693
H1B   2    0.769345    0.229841    0.662397    11.00000    0.04091
C2    1    0.582779    0.166129    0.640463    11.00000    0.01753    0.02351 =
         0.02532    0.00066    0.00672   -0.00184
H2B   2    0.507898    0.171574    0.529701    11.00000    0.03036
H2A   2    0.695307    0.143678    0.650788    11.00000    0.02763
C3    1    0.439240    0.146342    0.724281    11.00000    0.01775    0.01735 =
         0.01846   -0.00308    0.00397   -0.00242
H3B   2    0.324158    0.168807    0.712727    11.00000    0.01556
H3A   2    0.519486    0.141286    0.841041    11.00000    0.02316
C4    1    0.492080    0.055188    0.698207    11.00000    0.02457    0.02007 =
         0.02067    0.00089   -0.00008    0.00594
H4C   2    0.580968    0.061286    0.635391    11.00000    0.02637
H4B   2    0.414975    0.023335    0.664257    11.00000    0.02768
H4A   2    0.575850    0.055601    0.812615    11.00000    0.03014
C5    1    0.191490    0.085894    0.756616    11.00000    0.02613    0.02950 =
         0.01795    0.00037    0.00943   -0.00613
H5C   2    0.086307    0.113278    0.731997    11.00000    0.03035
H5B   2    0.120771    0.053634    0.719830    11.00000    0.02497
H5A   2    0.284522    0.084783    0.869247    11.00000    0.03439
B1    3   -0.120834    0.062277    0.186227    11.00000    0.01590    0.02405 =
         0.01855    0.00041    0.00252   -0.00306
H1    2   -0.247448    0.035440    0.122337    11.00000    0.02769
B2    3   -0.051314    0.109618    0.076809    11.00000    0.01533    0.02429 =
         0.01653    0.00139    0.00226    0.00047
H2    2   -0.114428    0.114531   -0.053679    11.00000    0.02465
B3    3    0.131589    0.061514    0.165948    11.00000    0.01852    0.02035 =
         0.01673   -0.00263    0.00353    0.00056
H3    2    0.193938    0.035932    0.097957    11.00000    0.02560
B4    3    0.110508    0.046482    0.353976    11.00000    0.01582    0.01744 =
         0.01669   -0.00064    0.00309   -0.00168
H4    2    0.162006    0.008368    0.403699    11.00000    0.01983
B5    3   -0.078663    0.086265    0.383134    11.00000    0.01301    0.02176 =
         0.01946    0.00150    0.00503   -0.00088
H5    2   -0.181175    0.075589    0.454593    11.00000    0.03254
B6    3   -0.181294    0.127431    0.208924    11.00000    0.01343    0.02471 =
         0.02022    0.00316    0.00461    0.00271
H6    2   -0.346447    0.140054    0.160531    11.00000    0.02713
C7    1    0.205006    0.123518    0.187466    11.00000    0.01395    0.02124 =
         0.01656    0.00202    0.00542    0.00012
H7    2    0.303463    0.130410    0.135431    11.00000    0.02561
C8    1    0.293456    0.090809    0.342388    11.00000    0.01193    0.01881 =
         0.01655    0.00040    0.00332    0.00091
H8    2    0.441765    0.080941    0.372924    11.00000    0.02100
B9    3    0.191532    0.101320    0.474742    11.00000    0.01317    0.01699 =
         0.01499    0.00137    0.00341    0.00075
B10   3    0.001300    0.150962    0.397062    11.00000    0.01776    0.02015 =
         0.01921    0.00120    0.00753    0.00234
H10   2   -0.060896    0.176688    0.466456    11.00000    0.02334
B11   3    0.034162    0.164891    0.202072    11.00000    0.01732    0.01946 =
         0.02017    0.00234    0.00703    0.00227
H11   2    0.010116    0.201013    0.140512    11.00000    0.02483
H1C   2    0.139931    0.171601    0.358838    11.00000    0.03123
HKLF 4

REM  a in P2(1)/c
REM R1 =  0.0461 for    3133 Fo > 4sig(Fo)  and  0.0751 for all    4359 data
REM    273 parameters refined using      0 restraints

END

WGHT      0.0645      0.0808

REM Instructions for potential hydrogen bonds
EQIV $1 x, -y+1/2, z+1/2
HTAB C3 N4_$1

REM Highest difference peak  0.321,  deepest hole -0.178,  1-sigma level  0.044
Q1    1   0.6343  0.1875  0.7046  11.00000  0.05    0.32
Q2    1   0.2571  0.0957  0.5656  11.00000  0.05    0.30
Q3    1   0.4122  0.0760  0.6824  11.00000  0.05    0.29
Q4    1   0.2495  0.1039  0.2607  11.00000  0.05    0.28
Q5    1   0.3920  0.1219  0.6964  11.00000  0.05    0.26
Q6    1   0.1084  0.1302  0.4301  11.00000  0.05    0.26
Q7    1   0.1230  0.1450  0.1929  11.00000  0.05    0.25
Q8    1   0.0138  0.0797  0.1185  11.00000  0.05    0.24
Q9    1   0.5129  0.1550  0.6876  11.00000  0.05    0.24
Q10   1   0.2771  0.0976  0.4199  11.00000  0.05    0.24
Q11   1  -0.0747  0.1500  0.2756  11.00000  0.05    0.23
Q12   1  -0.1214  0.0855  0.2555  11.00000  0.05    0.22
Q13   1   0.0658  0.0853  0.4218  11.00000  0.05    0.22
Q14   1   0.1190  0.0998  0.1448  11.00000  0.05    0.21
Q15   1   0.6103  0.2351  0.7485  11.00000  0.05    0.20
Q16   1   0.0644  0.0505  0.2446  11.00000  0.05    0.20
Q17   1   0.0645  0.1290  0.1359  11.00000  0.05    0.19
Q18   1  -0.0649  0.1388  0.1431  11.00000  0.05    0.18
Q19   1  -0.1384  0.1089  0.3153  11.00000  0.05    0.18
Q20   1   0.0151  0.1127  0.4431  11.00000  0.05    0.17
;
_shelx_res_checksum   62976

_shelx_hkl_file
;
   1   0   0    1.63    0.19
   1   0   0    1.72    0.16
   1   0   0    1.74    0.15
   2   0   0    0.19    0.16
   2   0   0    0.08    0.20
   2   0   0    0.14    0.24
   3   0   0   19.73    0.82
   3   0   0   18.78    0.61
   3   0   0   20.81    0.71
   4   0   0    0.02    0.22
   4   0   0    0.28    0.27
   4   0   0    0.15    0.30
   5   0   0    1.46    0.43
   5   0   0    0.71    0.41
   5   0   0    0.94    0.32
   6   0   0    5.62    0.53
   6   0   0    6.32    0.66
   6   0   0    6.56    0.85
   7   0   0    0.18    0.40
   7   0   0    0.18    0.52
   8   0   0   10.52    1.18
  -8   0   0   10.73    0.95
  -9   0   0    1.46    0.58
   0  -1   0   -0.01    0.00
   0   1   0   -0.01    0.00
   1  -1   0  170.92    2.49
   1  -1   0  168.22    2.31
   1  -1   0  172.97    3.10
   1   1   0  170.97    3.13
   1   1   0  170.18    2.32
   1   1   0  172.66    2.45
   2  -1   0    7.19    0.45
   2  -1   0    6.97    0.38
   2  -1   0    7.13    0.33
   2   1   0    6.85    0.33
   2   1   0    6.73    0.50
   2   1   0    7.00    0.38
   3  -1   0   16.97    0.58
   3  -1   0   16.19    0.73
   3  -1   0   18.12    0.69
   3   1   0   15.42    0.76
   3   1   0   16.11    0.58
   3   1   0   17.07    0.65
   4  -1   0    1.19    0.26
   4  -1   0    1.26    0.36
   4  -1   0    1.22    0.39
   4   1   0    1.45    0.27
   4   1   0    0.82    0.40
   4   1   0    0.96    0.28
   5  -1   0    0.39    0.44
   5  -1   0   -0.10    0.28
   5  -1   0    0.14    0.34
   5   1   0   -0.11    0.27
   5   1   0   -0.03    0.44
   5   1   0   -0.05    0.30
   6  -1   0    0.15    0.49
   6  -1   0    0.33    0.40
   6   1   0    0.05    0.50
   6   1   0    0.57    0.40
   6   1   0   -0.08    0.32
   7  -1   0    1.30    0.50
   7  -1   0    0.97    0.59
   7   1   0    0.65    0.42
   7   1   0    0.28    0.55
   8  -1   0    0.16    0.58
  -8  -1   0    0.57    0.46
   8   1   0   -0.46    0.61
  -9  -1   0   -0.15    0.44
  -9   1   0    1.07    0.55
 -10   1   0    2.30    0.96
   0  -2   0   -1.09    0.02
   0   2   0   -1.06    0.03
   0   2   0   -1.00    0.05
   0   2   0   -1.09    0.02
   1  -2   0  292.01    5.42
   1  -2   0  280.79    4.07
   1   2   0  290.82    3.82
   1   2   0  283.51    4.09
   1   2   0  288.58    5.14
   2  -2   0   13.94    0.54
   2  -2   0   14.42    0.43
   2  -2   0   14.58    0.57
   2   2   0   14.53    0.47
   2   2   0   14.06    0.44
   2   2   0   13.92    0.62
   3  -2   0   71.09    1.74
   3  -2   0   73.27    1.51
   3  -2   0   71.24    1.31
   3   2   0   71.80    1.42
   3   2   0   71.20    1.32
   3   2   0   73.49    1.86
   4  -2   0   17.78    0.83
   4  -2   0   17.63    0.76
   4  -2   0   18.44    0.64
   4   2   0   18.50    0.73
   4   2   0   17.92    0.66
   4   2   0   17.97    0.94
   5  -2   0   11.94    0.86
   5  -2   0   11.70    0.75
   5   2   0   11.99    0.73
   5   2   0   10.99    0.97
   5   2   0   10.36    0.63
   6  -2   0    0.12    0.43
   6  -2   0    0.70    0.39
   6   2   0    0.62    0.56
   6   2   0    0.22    0.33
   6   2   0    0.14    0.36
   7  -2   0    1.75    0.52
   7  -2   0    2.48    0.64
   7   2   0    1.46    0.66
   7   2   0    1.58    0.50
   7   2   0    1.08    0.40
  -8  -2   0    1.16    0.51
   8  -2   0    1.00    0.53
   8  -2   0    1.26    0.66
   8   2   0    0.25    0.67
  -9  -2   0    1.09    0.49
  -9   2   0    1.02    0.58
 -10   2   0    1.40    0.58
   0  -3   0   -0.98    0.11
   0  -3   0   -0.85    0.07
   0   3   0   -0.99    0.09
   0   3   0   -0.87    0.08
   1  -3   0  252.09    3.61
   1  -3   0  245.92    4.62
   1   3   0  248.40    4.56
   1   3   0  257.43    3.39
   2  -3   0    3.84    0.36
   2  -3   0    3.30    0.35
   2   3   0    3.76    0.30
   2   3   0    3.61    0.30
   2   3   0    3.40    0.43
   3  -3   0   52.95    1.23
   3  -3   0   51.55    1.39
   3   3   0   54.18    1.12
   3   3   0   55.32    1.15
   3   3   0   53.21    1.53
   4  -3   0    5.38    0.51
   4  -3   0    5.08    0.56
   4   3   0    6.41    0.45
   4   3   0    5.41    0.47
   4   3   0    5.56    0.69
   5  -3   0    8.77    0.76
   5  -3   0    7.38    0.69
   5   3   0    5.82    0.62
   5   3   0    8.56    0.62
   5   3   0    7.75    0.92
   6  -3   0    4.66    0.64
   6  -3   0    5.44    0.71
   6   3   0    4.79    0.51
   6   3   0    4.66    0.74
   6   3   0    5.68    0.61
  -7  -3   0   11.17    0.88
   7  -3   0   12.32    1.02
   7  -3   0   12.37    0.97
   7   3   0   12.04    0.82
   7   3   0   12.26    1.17
  -8  -3   0    3.59    0.62
   8  -3   0    3.09    0.74
   8  -3   0    3.52    0.68
   8   3   0    2.35    0.84
  -9  -3   0    4.08    0.83
  -9   3   0    2.01    0.68
 -10   3   0    3.30    0.71
   0  -4   0  527.04    7.55
   0  -4   0  528.40    9.93
   1  -4   0  252.34    4.64
  -1  -4   0  267.91    3.69
   1  -4   0  265.36    3.78
   1   4   0  265.52    3.56
   1   4   0  256.03    4.78
   2  -4   0   10.44    0.48
   2  -4   0    9.11    0.47
   2   4   0   10.22    0.37
   2   4   0   10.38    0.61
   2   4   0   10.27    0.42
   3  -4   0    0.73    0.30
   3  -4   0    1.04    0.31
   3   4   0    0.92    0.25
   3   4   0    0.75    0.26
   3   4   0    0.93    0.41
   4  -4   0    1.23    0.35
   4  -4   0    0.54    0.32
   4   4   0    0.84    0.25
   4   4   0    1.06    0.30
   4   4   0    1.52    0.48
   5  -4   0   23.89    1.08
   5  -4   0   23.65    1.09
   5   4   0   22.85    0.87
   5   4   0   23.27    0.90
   5   4   0   25.76    1.35
   6  -4   0    3.13    0.57
   6  -4   0    3.65    0.62
   6   4   0    3.12    0.50
   6   4   0    3.54    0.48
   6   4   0    2.62    0.71
  -7  -4   0    0.48    0.39
   7  -4   0    0.34    0.43
   7   4   0   -0.25    0.34
   7   4   0    0.29    0.58
   8  -4   0   23.36    1.28
  -8  -4   0   22.09    1.13
   8  -4   0   23.11    1.47
   8   4   0   19.34    1.54
   8   4   0   21.27    1.09
  -9  -4   0    2.84    0.76
  -9   4   0    0.28    0.52
 -10   4   0    1.97    0.64
   0  -5   0    0.46    0.18
   1  -5   0   49.73    1.11
  -1  -5   0   51.36    0.80
   1  -5   0   51.14    0.98
   1   5   0   51.69    0.93
   1   5   0   49.89    1.23
   2  -5   0    0.21    0.24
   2  -5   0    0.48    0.22
  -2  -5   0    0.20    0.16
   2   5   0    0.26    0.31
   2   5   0    0.05    0.20
   3  -5   0    1.34    0.31
   3  -5   0    1.19    0.36
   3   5   0    1.68    0.45
   3   5   0    1.70    0.27
   3   5   0    1.30    0.25
   4  -5   0    1.27    0.40
   4  -5   0    1.20    0.33
   4   5   0    1.10    0.27
   4   5   0    0.67    0.42
   4   5   0    0.80    0.26
   5  -5   0    8.00    0.71
   5  -5   0    8.68    0.74
   5   5   0    8.62    0.60
   5   5   0    6.83    0.58
   5   5   0    7.49    0.88
   6  -5   0    0.27    0.43
  -6  -5   0    0.54    0.36
   6  -5   0    0.35    0.46
   6   5   0    1.07    0.57
   6   5   0    0.33    0.34
   7  -5   0    2.19    0.60
   7  -5   0    3.23    0.65
  -7  -5   0    3.09    0.53
   7   5   0    2.17    0.70
   7   5   0    2.78    0.49
  -8  -5   0    2.29    0.53
   8  -5   0    1.51    0.54
   8   5   0    1.05    0.48
   8   5   0    0.54    0.78
  -9   5   0    0.83    0.62
 -10   5   0    2.00    0.67
   0  -6   0  761.23   10.83
   0  -6   0  754.52   14.39
   0   6   0  750.12   10.87
  -1  -6   0    9.22    0.26
   1  -6   0    9.97    0.45
  -1  -6   0    8.50    0.58
   1  -6   0    9.43    0.42
   1   6   0   10.25    0.40
   1   6   0   10.08    0.26
  -1   6   0    9.22    0.41
   2  -6   0  100.91    2.07
   2  -6   0   97.26    1.79
  -2  -6   0  102.66    1.58
   2   6   0  100.21    2.29
   2   6   0   99.77    1.66
   3  -6   0   20.43    0.77
   3  -6   0   19.59    0.76
  -3  -6   0   19.85    0.61
   3   6   0   19.53    0.97
   3   6   0   20.17    0.67
   4  -6   0    4.36    0.50
   4  -6   0    4.16    0.51
   4   6   0    3.95    0.39
   4   6   0    4.13    0.40
   4   6   0    4.54    0.64
   5  -6   0   38.96    1.32
  -5  -6   0   38.69    1.14
   5  -6   0   38.64    1.37
   5   6   0   38.13    1.62
   5   6   0   39.91    1.13
  -6  -6   0    2.83    0.47
   6  -6   0    3.13    0.57
   6  -6   0    2.94    0.58
   6   6   0    3.42    0.80
   6   6   0    2.60    0.45
   7  -6   0    9.84    0.89
   7  -6   0   11.13    1.00
  -7  -6   0   11.08    0.80
   7   6   0    8.90    1.09
   7   6   0   10.76    0.77
  -8  -6   0    2.02    0.52
   8  -6   0    1.06    0.53
   8   6   0   -0.38    0.40
   8   6   0    0.29    0.80
  -9  -6   0    4.51    0.95
 -10   6   0    2.72    0.74
   1  -7   0  114.19    1.89
   1  -7   0  112.64    2.27
  -1  -7   0  117.16    2.47
  -1  -7   0  118.95    1.66
  -1   7   0  113.91    1.79
   1   7   0  118.80    1.84
  -2  -7   0  138.81    2.07
   2  -7   0  136.35    2.34
   2  -7   0  137.22    2.71
   2   7   0  139.11    2.18
   2   7   0  138.10    2.96
  -3  -7   0   49.03    1.01
   3  -7   0   49.27    1.24
   3  -7   0   48.62    1.31
   3   7   0   50.35    1.58
   3   7   0   50.54    1.12
  -4  -7   0   11.56    0.54
   4  -7   0   11.52    0.68
   4  -7   0   10.98    0.68
   4   7   0   12.28    0.90
   4   7   0   12.27    0.61
   5  -7   0    4.79    0.61
  -5  -7   0    6.16    0.52
   5  -7   0    5.62    0.64
   5   7   0    5.91    0.59
   5   7   0    7.48    1.02
   6  -7   0    0.15    0.40
  -6  -7   0    0.18    0.32
   6  -7   0    0.09    0.39
   6   7   0    0.46    0.36
   6   7   0    0.36    0.57
   7  -7   0   -0.33    0.48
   7  -7   0    0.19    0.40
  -7  -7   0    0.27    0.33
   7   7   0    0.41    0.38
   7   7   0   -0.60    0.57
   8  -7   0    0.70    0.54
  -8  -7   0    2.51    0.80
   8   7   0    0.25    0.42
   9  -7   0    7.66    1.04
 -10   7   0    0.89    0.63
   0  -8   0    2.41    0.44
   0  -8   0    2.31    0.22
   0   8   0    2.23    0.24
   1  -8   0   38.48    0.86
  -1  -8   0   38.61    1.16
   1  -8   0   37.13    1.02
  -1  -8   0   39.21    0.63
   1   8   0   37.80    0.85
  -1   8   0   37.45    0.81
  -2  -8   0    6.88    0.29
   2  -8   0    7.65    0.46
   2  -8   0    7.33    0.49
   2   8   0    7.31    0.64
   2   8   0    6.96    0.45
  -3  -8   0    0.02    0.18
   3  -8   0    0.55    0.31
   3  -8   0    0.23    0.25
   3   8   0    0.62    0.45
   3   8   0    0.65    0.26
  -4  -8   0   12.31    0.55
   4  -8   0   11.80    0.69
   4  -8   0   12.16    0.71
   4   8   0   12.49    0.63
   4   8   0   12.73    1.06
   5  -8   0   30.74    1.19
   5  -8   0   31.84    1.21
  -5  -8   0   31.60    0.97
   5   8   0   33.25    1.07
   5   8   0   32.18    1.61
   6  -8   0    0.53    0.47
  -6  -8   0    1.22    0.37
   6  -8   0    1.23    0.46
   6   8   0    1.13    0.63
   6   8   0    1.22    0.40
  -7  -8   0    4.29    0.57
   7  -8   0    4.93    0.69
   7  -8   0    3.99    0.72
   7   8   0    4.50    0.59
   7   8   0    2.18    0.88
   8  -8   0    9.89    0.98
  -8  -8   0   15.27    1.46
   8   8   0   11.25    0.90
  -9  -8   0    4.49    0.94
   9  -8   0    0.92    0.62
 -10   8   0    0.67    0.62
   0  -9   0    0.29    0.18
   0  -9   0    0.12    0.32
   0   9   0   -0.17    0.19
   1  -9   0   29.02    0.90
   1  -9   0   28.76    0.75
  -1  -9   0   30.45    0.53
  -1  -9   0   29.38    1.06
  -1   9   0   29.00    0.75
   1   9   0   29.05    0.75
  -2  -9   0    3.35    0.25
   2  -9   0    4.96    0.48
   2  -9   0    5.24    0.45
  -2  -9   0    3.51    0.55
   2   9   0    4.06    0.40
   3  -9   0   62.26    1.56
   3  -9   0   62.39    1.50
  -3  -9   0   61.14    1.14
   3   9   0   61.74    1.31
   3   9   0   61.78    1.85
   4  -9   0    0.20    0.35
   4  -9   0    0.24    0.26
  -4  -9   0    0.09    0.20
   4   9   0    0.15    0.47
   4   9   0    0.22    0.26
   5  -9   0    6.79    0.70
  -5  -9   0    8.02    0.57
   5  -9   0    8.20    0.68
   5   9   0    8.07    0.65
   5   9   0    8.54    1.00
   6  -9   0    0.29    0.35
  -6  -9   0    0.76    0.32
   6  -9   0   -0.30    0.45
   6   9   0   -0.27    0.66
   6   9   0    0.35    0.32
  -7  -9   0   10.21    0.79
   7  -9   0    9.40    0.96
   7  -9   0    8.95    0.87
   7   9   0   10.05    0.82
  -8  -9   0    2.80    0.82
   8  -9   0    2.60    0.69
   8   9   0    1.88    0.51
  -9  -9   0    3.83    0.96
   9  -9   0    0.05    0.60
 -10   9   0    1.25    0.71
   0 -10   0   58.21    1.04
   0 -10   0   57.96    1.53
   0  10   0   58.81    1.17
  -1 -10   0   61.22    1.00
   1 -10   0   63.18    1.53
  -1 -10   0   62.58    1.69
   1 -10   0   62.97    1.25
   1  10   0   64.20    1.25
  -1  10   0   63.89    1.25
   2 -10   0  322.89    6.02
  -2 -10   0  326.44    4.56
   2 -10   0  324.26    4.99
  -2 -10   0  326.88    6.37
  -2  10   0  327.40    4.68
   2  10   0  335.68    4.72
   3 -10   0   67.64    1.65
  -3 -10   0   66.57    1.20
   3 -10   0   63.97    1.55
   3  10   0   69.69    1.44
   3  10   0   67.45    1.97
   4 -10   0   -0.27    0.22
   4 -10   0    0.22    0.32
  -4 -10   0    0.02    0.18
   4  10   0   -0.54    0.46
   4  10   0   -0.02    0.27
   5 -10   0   -0.03    0.42
   5 -10   0    0.36    0.34
  -5 -10   0    0.44    0.27
   5  10   0    0.04    0.58
   5  10   0   -0.23    0.32
   6 -10   0    0.84    0.40
   6 -10   0    0.93    0.48
  -6 -10   0    0.96    0.34
   6  10   0    0.94    0.38
   6  10   0    0.61    0.65
  -7 -10   0   11.63    1.31
   7 -10   0   10.94    0.97
   7  10   0   10.65    0.84
   8 -10   0   26.29    1.50
  -8 -10   0   26.24    1.72
   8  10   0   25.47    1.24
  -9 -10   0   10.69    1.47
 -10  10   0   -0.29    0.56
   0 -11   0    0.09    0.18
   0 -11   0    0.11    0.39
   0  11   0    0.14    0.20
  -1 -11   0    4.77    0.25
   1 -11   0    5.42    0.43
   1 -11   0    5.63    0.59
  -1 -11   0    3.94    0.57
  -1  11   0    4.83    0.46
   1  11   0    4.94    0.42
   2 -11   0    5.19    0.52
  -2 -11   0    3.87    0.27
   2 -11   0    3.71    0.44
  -2 -11   0    3.23    0.59
  -2  11   0    4.41    0.41
   2  11   0    3.91    0.38
   3 -11   0    3.29    0.45
  -3 -11   0    3.60    0.61
   3 -11   0    3.83    0.45
  -3 -11   0    3.85    0.30
   3  11   0    4.55    0.47
   4 -11   0    6.55    0.55
  -4 -11   0    6.70    0.41
   4 -11   0    5.30    0.61
   4  11   0    6.59    0.86
   4  11   0    5.87    0.54
  -5 -11   0    1.08    0.29
   5 -11   0    0.76    0.36
   5 -11   0    1.04    0.46
   5  11   0    0.03    0.37
   5  11   0    1.56    0.67
   6 -11   0    0.66    0.38
  -6 -11   0    0.40    0.28
   6 -11   0    0.84    0.53
  -6 -11   0    0.79    0.63
   6  11   0    1.05    0.39
   7 -11   0    4.21    0.80
  -7 -11   0    5.62    1.05
   7  11   0    4.89    0.62
  -8 -11   0    5.48    1.14
   8 -11   0    4.35    0.83
   8  11   0    3.61    0.64
  -9 -11   0    5.97    1.09
   9 -11   0    2.72    0.78
   0 -12   0   29.98    0.69
   0 -12   0   30.69    1.16
   0  12   0   30.55    0.82
  -1 -12   0   20.04    0.45
  -1 -12   0   18.91    1.03
   1 -12   0   19.25    0.65
   1 -12   0   19.26    0.86
  -1  12   0   18.70    0.67
   1  12   0   18.52    0.68
  -2 -12   0   49.77    1.66
   2 -12   0   49.83    1.24
  -2 -12   0   49.99    0.82
   2 -12   0   50.22    1.36
   2  12   0   49.51    1.18
  -2  12   0   47.58    1.15
   3 -12   0    7.43    0.60
  -3 -12   0    7.34    0.34
   3 -12   0    7.01    0.52
  -3 -12   0    7.04    0.81
   3  12   0    7.12    0.54
  -3  12   0    8.38    0.60
   4 -12   0    0.12    0.28
  -4 -12   0    0.09    0.20
  -4 -12   0    0.33    0.49
   4 -12   0    0.17    0.41
   4  12   0    0.04    0.29
  -5 -12   0    1.30    0.70
   5 -12   0    1.34    0.39
  -5 -12   0    1.36    0.30
   5 -12   0    1.34    0.52
   5  12   0    1.17    0.41
   6 -12   0    0.77    0.40
   6 -12   0    0.78    0.49
  -6 -12   0    1.28    0.62
   6  12   0    0.93    0.40
  -7 -12   0    2.13    0.85
   7 -12   0    1.53    0.58
   7  12   0    2.41    0.49
   8 -12   0    1.31    0.70
  -8 -12   0    2.66    0.95
   8  12   0    0.56    0.49
   9 -12   0    0.82    0.63
   0 -13   0    0.23    0.20
   0 -13   0   -0.23    0.47
   0  13   0    0.08    0.26
   1 -13   0   41.56    1.00
  -1 -13   0   41.70    0.75
   1 -13   0   40.01    1.29
  -1 -13   0   40.19    1.47
   1  13   0   41.89    1.04
  -1  13   0   41.72    1.04
   2 -13   0    6.12    0.50
  -2 -13   0    5.03    0.25
  -2 -13   0    3.72    0.63
   2 -13   0    5.77    0.58
  -2  13   0    6.27    0.53
   2  13   0    5.14    0.48
  -3 -13   0   27.67    0.60
  -3 -13   0   25.83    1.28
   3 -13   0   27.65    1.00
   3 -13   0   27.90    0.99
   3  13   0   27.47    0.91
  -3  13   0   26.54    0.92
  -4 -13   0    7.04    0.40
   4 -13   0    7.13    0.57
  -4 -13   0    5.50    0.81
   4 -13   0    6.69    0.72
   4  13   0    6.53    0.60
  -5 -13   0   19.75    0.70
   5 -13   0   18.66    0.93
  -5 -13   0   17.76    1.33
   5 -13   0   19.81    1.09
   5  13   0   18.20    0.88
   6 -13   0    2.38    0.47
   6 -13   0    2.56    0.66
  -6 -13   0    3.58    0.82
   6  13   0    2.40    0.47
   7 -13   0   15.57    1.22
  -7 -13   0   14.55    1.53
   7  13   0   15.37    1.00
  -8 -13   0    2.97    0.99
   8 -13   0    0.99    0.60
   8  13   0    0.98    0.51
  -9 -13   0    4.67    0.95
   9 -13   0    0.89    0.66
   0 -14   0    2.26    0.29
   0 -14   0    1.53    0.57
   0  14   0    1.99    0.32
   1 -14   0    0.62    0.26
  -1 -14   0   -0.17    0.47
  -1 -14   0    0.05    0.15
   1 -14   0    0.00    0.41
   1  14   0    0.27    0.26
  -1  14   0   -0.07    0.25
   2 -14   0    8.65    0.60
   2 -14   0    8.73    0.65
  -2 -14   0    8.48    0.28
  -2 -14   0    7.46    0.83
   2  14   0    8.97    0.58
  -2  14   0    9.55    0.62
  -3 -14   0    1.16    0.57
   3 -14   0    1.54    0.38
   3 -14   0    1.37    0.39
  -3 -14   0    1.54    0.20
   3  14   0    1.08    0.29
  -3  14   0    1.39    0.36
  -4 -14   0    0.31    0.20
   4 -14   0   -0.01    0.29
   4 -14   0   -0.25    0.41
  -4 -14   0   -0.60    0.51
  -4  14   0   -0.03    0.35
   4  14   0    0.07    0.30
   5 -14   0    0.59    0.35
  -5 -14   0    0.89    0.65
   5 -14   0    0.78    0.50
   5  14   0    0.59    0.36
   6 -14   0    0.58    0.54
  -6 -14   0    0.62    0.70
   6  14   0   -0.10    0.33
   7 -14   0    7.72    0.99
  -7 -14   0    7.48    1.15
   7  14   0    8.43    0.80
  -8 -14   0    3.97    1.03
   8 -14   0    3.64    0.86
   8  14   0    1.26    0.54
  -9 -14   0    4.32    0.98
   9 -14   0    2.35    0.70
   0 -15   0   -0.01    0.19
   0 -15   0   -0.03    0.49
   0  15   0    0.15    0.24
  -1 -15   0    7.81    0.33
  -1 -15   0    7.58    0.78
   1 -15   0    7.77    0.49
   1 -15   0    7.91    0.77
  -1  15   0    7.64    0.52
   1  15   0    7.78    0.55
  -2 -15   0   14.76    1.03
   2 -15   0   15.91    0.74
  -2 -15   0   17.56    0.37
   2 -15   0   16.43    0.83
  -2  15   0   16.80    0.77
   2  15   0   15.98    0.73
  -3 -15   0    0.74    0.55
  -3 -15   0    1.13    0.18
   3 -15   0    0.81    0.33
   3 -15   0    1.18    0.43
  -3  15   0    1.49    0.36
   3  15   0    1.28    0.32
   4 -15   0    2.58    0.44
   4 -15   0    1.87    0.53
  -4 -15   0    2.04    0.71
  -4 -15   0    2.97    0.31
   4  15   0    2.48    0.42
  -4  15   0    3.07    0.49
   5 -15   0    6.61    0.78
   5 -15   0    4.93    0.55
  -5 -15   0    5.18    0.90
   5  15   0    5.16    0.59
  -5  15   0    5.81    0.62
  -6 -15   0    0.04    0.62
   6 -15   0   -0.14    0.50
   6  15   0    0.45    0.36
  -7 -15   0    5.60    1.05
   7 -15   0    5.49    0.88
   7  15   0    5.36    0.67
   8 -15   0    5.02    0.95
  -8 -15   0    5.39    1.04
   8  15   0    3.51    0.67
   9 -15   0    0.81    0.68
  -9 -15   0    3.08    0.86
   0 -16   0   43.70    0.93
   0 -16   0   40.26    1.43
   0  16   0   42.90    1.14
   1 -16   0    0.59    0.49
  -1 -16   0    0.78    0.60
  -1 -16   0    0.65    0.17
   1 -16   0    0.34    0.27
   1  16   0    0.90    0.31
  -1  16   0    0.37    0.30
   2 -16   0   23.00    0.98
  -2 -16   0   21.70    1.21
  -2 -16   0   23.47    0.44
   2 -16   0   22.91    0.84
  -2  16   0   23.87    0.87
   2  16   0   21.80    0.85
   3 -16   0  126.82    2.51
   3 -16   0  122.62    2.78
  -3 -16   0  117.68    1.77
  -3 -16   0  120.02    3.24
  -3  16   0  122.18    2.33
   3  16   0  123.48    2.38
  -4 -16   0    2.25    0.79
   4 -16   0    2.43    0.45
   4 -16   0    2.92    0.57
  -4  16   0    2.51    0.47
   4  16   0    2.08    0.41
  -5 -16   0   -0.45    0.57
   5 -16   0    0.13    0.31
   5 -16   0    0.64    0.50
  -5  16   0    0.35    0.41
   5  16   0    0.09    0.33
   6 -16   0   -0.08    0.52
  -6 -16   0    0.50    0.66
  -6  16   0    0.37    0.44
   6  16   0    0.26    0.37
   7 -16   0    1.98    0.65
  -7 -16   0    4.82    1.00
  -7  16   0    2.46    0.56
   7  16   0    3.16    0.58
  -8 -16   0   10.59    1.40
   8 -16   0    7.23    1.03
   8  16   0    9.20    0.94
   9 -16   0    0.82    0.67
   0 -17   0    0.46    0.53
   0 -17   0    0.51    0.23
   0  17   0   -0.05    0.27
   1 -17   0   23.70    0.79
   1 -17   0   23.34    1.11
  -1 -17   0   23.52    1.20
  -1 -17   0   22.12    0.56
   1  17   0   23.80    0.86
  -1  17   0   21.43    0.82
  -2 -17   0    3.98    0.71
   2 -17   0    4.52    0.59
   2 -17   0    3.96    0.44
  -2  17   0    4.10    0.48
   2  17   0    2.93    0.39
   3 -17   0   -0.13    0.34
  -3 -17   0    0.16    0.56
   3 -17   0    0.76    0.42
   3  17   0    0.06    0.29
  -3  17   0    0.20    0.34
  -4 -17   0    0.66    0.64
   4 -17   0    1.31    0.40
   4 -17   0    1.54    0.47
  -4  17   0    0.61    0.41
   4  17   0    1.13    0.40
   5 -17   0    1.30    0.38
  -5 -17   0    0.44    0.66
   5 -17   0    2.01    0.58
   5  17   0    1.06    0.41
  -5  17   0    0.77    0.43
   6 -17   0    1.11    0.60
  -6 -17   0    1.18    0.72
  -6  17   0    0.75    0.47
   6  17   0    1.02    0.44
  -7 -17   0    1.72    0.81
   7 -17   0    1.51    0.64
   7  17   0    1.73    0.54
  -7  17   0    1.80    0.55
  -8 -17   0    1.99    0.87
   8 -17   0    0.36    0.59
   8  17   0    0.68    0.49
   9 -17   0    1.00    0.65
   0 -18   0   33.20    1.34
   0 -18   0   33.16    0.83
   0  18   0   32.23    1.03
  -1 -18   0    5.11    0.30
   1 -18   0    5.65    0.51
  -1 -18   0    4.96    0.79
   1 -18   0    6.03    0.81
  -1  18   0    4.69    0.49
   1  18   0    5.70    0.50
  -2 -18   0    2.43    0.74
   2 -18   0    1.85    0.36
   2 -18   0    1.11    0.48
   2  18   0    1.29    0.36
  -2  18   0    1.17    0.39
  -3 -18   0    0.39    0.60
   3 -18   0    1.24    0.41
   3 -18   0    0.93    0.42
   3  18   0    0.94    0.33
  -3  18   0    0.62    0.40
   4 -18   0    2.39    0.48
  -4 -18   0    2.42    0.78
   4 -18   0    2.27    0.57
  -4  18   0    2.58    0.51
   4  18   0    1.97    0.43
   5 -18   0    0.74    0.41
  -5 -18   0    0.21    0.71
   5 -18   0    0.56    0.46
   5  18   0    0.50    0.38
  -5  18   0    0.09    0.41
   6 -18   0    0.36    0.57
  -6 -18   0    0.76    0.78
  -6  18   0   -0.05    0.42
   6  18   0   -0.41    0.35
   7 -18   0    0.96    0.65
  -7 -18   0    0.92    0.77
  -7  18   0    0.05    0.47
   7  18   0    0.02    0.43
  -8 -18   0    4.10    1.04
   8 -18   0    2.53    0.76
   8  18   0    2.83    0.62
   9 -18   0   -0.22    0.60
  -9 -18   0    3.31    0.93
   0 -19   0    0.46    0.56
   0 -19   0    0.13    0.21
   0  19   0    0.38    0.32
  -1 -19   0   12.52    0.43
   1 -19   0   13.73    1.01
   1 -19   0   13.42    0.64
  -1 -19   0   14.23    1.13
  -1  19   0   13.11    0.76
   1  19   0   13.73    0.74
   2 -19   0    5.80    0.79
   2 -19   0    5.62    0.58
  -2 -19   0    5.02    0.85
  -2  19   0    5.67    0.57
   2  19   0    5.95    0.55
  -3 -19   0    0.51    0.66
   3 -19   0    1.09    0.40
   3 -19   0    1.00    0.42
   3  19   0    0.73    0.36
  -3  19   0    0.58    0.39
   4 -19   0    0.66    0.44
   4 -19   0    0.24    0.34
  -4 -19   0    0.00    0.68
  -4  19   0    0.14    0.40
   4  19   0    0.81    0.37
   5 -19   0    2.05    0.62
  -5 -19   0    2.02    0.78
   5  19   0    2.26    0.48
  -5  19   0    2.31    0.51
   6 -19   0    4.72    0.81
  -6 -19   0    5.33    1.02
  -6  19   0    4.32    0.65
   6  19   0    3.36    0.57
   7 -19   0    1.91    0.73
  -7 -19   0    2.51    0.88
  -7  19   0    1.34    0.56
   7  19   0    2.76    0.56
  -8 -19   0    1.91    0.93
   8 -19   0    0.15    0.64
   8  19   0   -0.16    0.46
  -9 -19   0    4.00    0.93
   9 -19   0    2.64    0.81
   0 -20   0   14.11    1.15
   0 -20   0   14.97    0.60
   0  20   0   14.22    0.78
   1 -20   0    1.69    0.35
  -1 -20   0    1.34    0.69
   1 -20   0    1.78    0.65
  -1 -20   0    1.93    0.24
   1  20   0    1.07    0.33
  -1  20   0    1.93    0.43
  -2 -20   0   27.48    1.53
   2 -20   0   27.25    1.01
   2 -20   0   27.69    1.22
  -2  20   0   26.88    1.06
   2  20   0   24.47    0.98
   3 -20   0   -0.24    0.38
   3 -20   0    0.36    0.36
  -3 -20   0   -0.40    0.69
  -3  20   0    0.00    0.38
   3  20   0    0.32    0.34
   4 -20   0    1.63    0.45
  -4 -20   0    1.87    0.79
   4 -20   0    1.10    0.50
  -4  20   0    1.89    0.52
   4  20   0    1.67    0.46
   5 -20   0   10.42    0.90
  -5 -20   0   10.13    1.25
   5  20   0    8.88    0.77
  -5  20   0    9.62    0.87
   6 -20   0    3.41    0.72
  -6 -20   0    2.38    0.86
  -6  20   0    2.71    0.58
   6  20   0    2.83    0.54
  -7 -20   0    1.60    0.84
   7 -20   0    1.58    0.73
  -7  20   0    0.52    0.78
   7  20   0    1.65    0.52
   8 -20   0    0.63    0.71
  -8 -20   0    3.27    1.00
   8  20   0    1.24    0.53
   9 -20   0    2.35    1.12
  -9 -20   0    3.52    0.95
   0 -21   0    0.77    0.60
   0 -21   0    0.28    0.23
   0  21   0    0.50    0.32
   1 -21   0    2.57    0.62
  -1 -21   0    2.78    0.76
  -1 -21   0    2.35    0.25
   1 -21   0    2.00    0.37
   1  21   0    2.08    0.43
  -1  21   0    2.40    0.47
   2 -21   0    4.10    0.53
   2 -21   0    3.86    0.67
  -2 -21   0    2.81    0.79
  -2  21   0    3.93    0.54
   2  21   0    3.42    0.48
   3 -21   0    0.06    0.38
  -3 -21   0   -0.08    0.69
   3 -21   0    0.95    0.47
  -3  21   0    0.37    0.39
   3  21   0    0.09    0.33
   4 -21   0   -0.18    0.35
  -4 -21   0   -0.57    0.67
   4 -21   0    0.17    0.46
  -4  21   0    0.06    0.40
   4  21   0   -0.64    0.31
  -5 -21   0    1.21    0.75
   5 -21   0    2.26    0.64
  -5  21   0    1.85    0.53
   5  21   0    1.71    0.49
  -6 -21   0    0.66    0.78
   6 -21   0    0.03    0.59
  -6  21   0   -0.13    0.45
   6  21   0    0.31    0.40
  -7 -21   0    1.72    0.86
   7 -21   0    1.41    0.66
   7  21   0    1.56    0.50
   8 -21   0    1.19    0.82
  -8 -21   0    2.79    1.01
   8  21   0    0.73    0.52
   0 -22   0    6.98    0.93
   0 -22   0    6.67    0.45
   0  22   0    5.58    0.60
  -1 -22   0    2.32    0.74
  -1 -22   0    3.25    0.30
   1 -22   0    3.11    0.43
   1 -22   0    3.25    0.74
   1  22   0    3.11    0.51
  -1  22   0    3.22    0.51
   2 -22   0   25.09    1.24
   2 -22   0   25.83    1.02
  -2 -22   0   25.01    1.61
  -2  22   0   26.11    1.11
   2  22   0   24.13    1.02
   3 -22   0    0.44    0.37
   3 -22   0    0.57    0.44
  -3 -22   0    0.06    0.78
  -3  22   0    0.90    0.43
   3  22   0    0.44    0.37
  -4 -22   0    2.02    0.92
   4 -22   0    2.10    0.59
   4 -22   0    1.23    0.45
  -4  22   0    1.96    0.54
   4  22   0    1.70    0.48
  -5 -22   0    3.22    0.92
   5 -22   0    4.42    0.72
  -5  22   0    3.42    0.62
   5  22   0    4.51    0.64
  -6 -22   0    0.78    0.81
   6 -22   0   -0.12    0.50
  -6  22   0   -0.25    0.48
   6  22   0    0.23    0.39
   7 -22   0    0.96    0.69
  -7 -22   0    1.20    0.86
   7  22   0    1.02    0.50
  -8 -22   0    3.73    1.02
   8 -22   0    1.79    0.72
   8  22   0    1.40    0.53
   0 -23   0    0.11    0.24
   0 -23   0   -0.46    0.65
   0  23   0    0.75    0.39
  -1 -23   0   23.44    1.52
  -1 -23   0   19.01    0.70
   1 -23   0   21.16    1.30
   1 -23   0   22.03    0.86
   1  23   0   20.84    0.98
  -1  23   0   22.15    1.01
   2 -23   0   10.49    1.03
  -2 -23   0    9.55    1.18
   2 -23   0    9.95    0.72
   2  23   0   10.82    0.75
  -2  23   0   12.37    0.88
   3 -23   0    3.18    0.60
   3 -23   0    3.72    0.57
  -3 -23   0    3.04    0.86
   3  23   0    3.27    0.51
  -3  23   0    2.71    0.54
   4 -23   0    1.67    0.55
  -4 -23   0    1.52    0.86
  -4  23   0    1.61    0.52
   4  23   0    1.51    0.42
   5 -23   0    0.45    0.58
  -5 -23   0    0.35    0.73
   5  23   0    0.70    0.44
  -5  23   0    0.10    0.45
  -6 -23   0    7.08    1.26
   6 -23   0    8.64    1.08
   6  23   0    8.26    0.84
  -6  23   0    6.53    0.80
  -7 -23   0    1.65    0.91
   7 -23   0    0.28    0.66
   7  23   0    0.62    0.48
   8 -23   0   -0.49    0.64
  -8 -23   0    2.73    0.94
   8  23   0    0.45    0.46
   0 -24   0    1.06    0.29
   0 -24   0    0.64    0.74
   0  24   0    0.55    0.38
   1 -24   0    0.28    0.65
   1 -24   0    1.09    0.34
  -1 -24   0    0.87    0.80
   1  24   0    1.18    0.38
  -1  24   0    1.66    0.46
  -2 -24   0    2.64    0.83
   2 -24   0    3.35    0.51
   2 -24   0    2.76    0.70
  -2  24   0    2.77    0.52
   2  24   0    3.50    0.56
   3 -24   0    0.55    0.44
  -3 -24   0    0.72    0.84
   3 -24   0   -0.18    0.41
  -3  24   0    0.12    0.43
   3  24   0    0.79    0.36
  -4 -24   0    1.82    0.95
   4 -24   0    3.02    0.62
   4  24   0    3.10    0.57
  -4  24   0    2.47    0.56
   5 -24   0    0.14    0.54
  -5 -24   0   -0.48    0.82
   5  24   0   -0.03    0.40
  -5  24   0    0.03    0.47
  -6 -24   0    1.15    0.99
   6 -24   0    0.07    0.58
  -6  24   0   -0.17    0.51
   6  24   0    0.95    0.49
   7 -24   0    0.98    0.72
  -7 -24   0    1.71    0.96
   7  24   0    2.28    0.58
   8 -24   0    4.08    1.01
  -8 -24   0    4.97    1.13
   8  24   0    4.35    0.73
   0 -25   0    0.40    0.25
   0 -25   0    0.22    0.74
   0  25   0    0.28    0.38
   1 -25   0    1.01    0.73
   1 -25   0    1.06    0.34
  -1 -25   0    1.50    0.84
  -1  25   0    1.02    0.45
   1  25   0    1.40    0.44
   2 -25   0    6.63    0.64
   2 -25   0    7.07    0.93
  -2 -25   0    6.80    1.13
   2  25   0    7.45    0.74
  -2  25   0    8.47    0.82
  -3 -25   0    4.75    1.00
   3 -25   0    4.97    0.71
   3 -25   0    5.08    0.68
   3  25   0    4.01    0.57
  -3  25   0    3.72    0.62
   4 -25   0   14.26    1.02
  -4 -25   0   12.40    1.43
   4  25   0   14.26    0.90
  -4  25   0   15.30    1.05
   5 -25   0    0.18    0.56
  -5 -25   0   -0.40    0.73
   5  25   0    0.25    0.43
  -5  25   0   -0.05    0.50
   6 -25   0    0.02    0.51
  -6 -25   0   -0.18    0.81
  -6  25   0    0.22    0.52
   6  25   0   -0.31    0.39
   7 -25   0    0.60    0.61
  -7 -25   0    2.42    1.03
   7  25   0    0.94    0.50
   8 -25   0    0.27    0.69
  -8 -25   0    1.49    0.91
   8  25   0   -0.03    0.48
   0 -26   0   22.35    1.52
   0 -26   0   22.12    0.75
   0  26   0   21.90    1.05
   1 -26   0    5.26    0.92
  -1 -26   0    6.11    1.05
   1 -26   0    6.12    0.56
  -1  26   0    4.36    0.60
   1  26   0    5.94    0.68
   2 -26   0    3.62    0.77
  -2 -26   0    4.65    0.98
   2 -26   0    3.62    0.54
   2  26   0    2.79    0.52
  -2  26   0    3.97    0.64
   3 -26   0    2.76    0.56
  -3 -26   0    2.55    0.90
   3 -26   0    2.62    0.62
  -3  26   0    1.71    0.55
   3  26   0    2.22    0.48
   4 -26   0    0.06    0.48
  -4 -26   0    0.31    0.81
  -4  26   0    0.02    0.49
   4  26   0    0.14    0.39
   5 -26   0   16.96    1.24
  -5 -26   0   16.15    1.66
  -5  26   0   16.26    1.12
   5  26   0   15.30    1.03
   6 -26   0    5.38    0.92
  -6 -26   0    4.51    1.18
   6  26   0    4.22    0.69
  -6  26   0    4.00    0.74
  -7 -26   0    1.23    0.96
   7 -26   0    0.05    0.67
   7  26   0    0.40    0.50
  -8 -26   0    4.16    1.24
   8 -26   0    0.97    0.75
   8  26   0    0.64    0.55
   0 -27   0    0.09    0.75
   0  27   0    1.11    0.44
   1 -27   0    1.49    0.37
   1 -27   0    2.44    0.80
  -1 -27   0    1.50    0.84
  -1  27   0    2.21    0.50
   1  27   0    1.02    0.46
  -2 -27   0    0.68    0.77
   2 -27   0   -0.73    0.57
   2 -27   0   -0.12    0.35
   2  27   0   -0.14    0.38
  -2  27   0    0.14    0.43
  -3 -27   0    1.58    0.94
   3 -27   0    0.10    0.50
   3 -27   0    0.87    0.47
   3  27   0    0.87    0.42
  -3  27   0    1.08    0.52
  -4 -27   0    0.18    0.80
   4 -27   0    0.28    0.51
   4  27   0   -0.06    0.40
  -4  27   0    0.32    0.53
   5 -27   0    0.47    0.59
  -5 -27   0    0.21    0.83
  -5  27   0    0.27    0.52
   5  27   0    0.30    0.42
   6 -27   0    0.59    0.66
  -6 -27   0    0.79    0.93
   6  27   0   -0.06    0.45
  -6  27   0    0.12    0.55
  -7 -27   0    0.82    0.97
   7 -27   0   -0.28    0.66
   7  27   0   -0.33    0.47
   8  27   0    0.72    0.52
   0 -28   0   13.96    1.41
   0  28   0   14.71    0.98
   1 -28   0    0.33    0.31
   1 -28   0    0.05    0.70
  -1 -28   0    0.25    0.83
  -1  28   0    0.49    0.46
   1  28   0    0.43    0.42
  -2 -28   0    0.88    0.79
   2 -28   0    0.07    0.61
   2 -28   0    0.50    0.39
   2  28   0    0.60    0.42
  -2  28   0    0.21    0.42
   3 -28   0    1.28    0.49
  -3 -28   0    0.51    0.82
  -3  28   0    1.62    0.57
   3  28   0    1.04    0.47
  -4 -28   0    0.89    0.98
   4 -28   0    0.51    0.49
  -4  28   0   -0.22    0.51
   4  28   0    0.87    0.49
   5 -28   0    1.22    0.65
  -5 -28   0    1.83    1.11
   5  28   0    0.99    0.50
  -5  28   0    0.08    0.55
   6 -28   0    0.26    0.67
  -6 -28   0    0.17    0.94
   6  28   0    0.38    0.48
  -6  28   0   -0.74    0.54
  -7 -28   0    1.86    1.04
   7 -28   0    1.42    0.74
   7  28   0    1.32    0.56
   0 -29   0    0.51    0.80
   0  29   0    0.01    0.36
  -1 -29   0    3.67    1.00
   1 -29   0    3.32    0.47
   1 -29   0    3.22    0.88
   1  29   0    3.28    0.60
  -1  29   0    2.80    0.58
   2 -29   0    1.40    0.44
   2 -29   0    1.20    0.71
  -2 -29   0    0.53    0.90
  -2  29   0    1.07    0.50
   2  29   0    0.88    0.45
   3 -29   0    1.06    0.48
  -3 -29   0    0.88    0.89
  -3  29   0    0.37    0.50
   3  29   0    0.07    0.42
   4 -29   0   10.81    0.99
  -4 -29   0    9.99    1.41
   4  29   0   10.31    0.93
  -4  29   0   10.37    1.02
   5 -29   0    0.19    0.61
  -5 -29   0    1.74    1.00
  -5  29   0    0.05    0.56
   5  29   0    0.21    0.46
   6 -29   0    2.01    0.77
  -6 -29   0    2.89    1.17
   6  29   0    2.95    0.65
  -6  29   0    1.88    0.68
   7 -29   0    5.07    0.97
  -7 -29   0    6.99    1.39
   7  29   0    5.59    0.82
   0 -30   0    0.30    0.73
   0  30   0    1.18    0.50
  -1 -30   0   -0.14    0.82
   1 -30   0   -0.76    0.69
  -1  30   0   -0.46    0.41
   1  30   0    0.21    0.44
   2 -30   0   -0.07    0.67
  -2 -30   0    2.09    1.00
   2 -30   0    1.67    0.46
   2  30   0    1.12    0.52
  -2  30   0    1.49    0.55
  -3 -30   0    0.39    0.86
   3 -30   0   -0.13    0.40
   3  30   0   -0.11    0.36
  -3  30   0    0.65    0.53
   4 -30   0    6.58    0.88
  -4 -30   0    4.88    1.19
  -4  30   0    4.44    0.76
   4  30   0    6.26    0.80
  -5 -30   0    6.31    1.32
   5 -30   0    3.83    0.81
   5  30   0    3.94    0.71
  -5  30   0    4.31    0.79
   6 -30   0    0.09    0.63
  -6 -30   0    2.00    1.18
  -6  30   0   -0.19    0.60
   6  30   0    0.51    0.50
  -7 -30   0    2.90    1.22
   7 -30   0   -0.45    0.61
   7  30   0   -0.05    0.48
   0 -31   0    0.17    0.81
   0  31   0    0.39    0.46
   1 -31   0   -0.07    0.72
  -1 -31   0    0.43    0.87
  -1  31   0    0.59    0.43
   1  31   0    0.32    0.46
   2 -31   0    0.16    0.37
  -2 -31   0    0.56    0.82
   2 -31   0   -0.81    0.64
   2  31   0    0.48    0.46
  -2  31   0    0.15    0.51
  -3 -31   0    4.23    1.19
   3 -31   0    3.82    0.66
   3  31   0    3.56    0.65
  -3  31   0    5.00    0.77
   4 -31   0    0.60    0.54
  -4 -31   0    0.91    1.11
  -4  31   0    0.49    0.58
   4  31   0    0.09    0.46
   5 -31   0    0.52    0.58
  -5 -31   0    1.12    1.06
  -5  31   0   -0.47    0.57
   5  31   0   -0.02    0.47
   6 -31   0    0.23    0.64
  -6 -31   0    2.52    1.27
   6  31   0    1.07    0.57
  -6  31   0    0.12    0.65
   7 -31   0    0.32    0.67
  -7 -31   0    2.40    1.37
   7  31   0    0.67    0.56
   0 -32   0   11.42    1.39
   0  32   0   10.94    1.00
  -1 -32   0    0.19    0.87
   1 -32   0   -0.52    0.75
   1  32   0    0.58    0.46
  -1  32   0   -0.42    0.42
  -2 -32   0   11.92    1.46
   2  32   0   10.99    0.98
  -2  32   0   10.70    1.02
  -3 -32   0    0.30    1.02
   3 -32   0   -0.18    0.39
  -3  32   0   -0.79    0.46
   3  32   0    0.17    0.45
  -4 -32   0    0.36    1.12
   4 -32   0    1.19    0.57
  -4  32   0   -0.37    0.56
   4  32   0    0.36    0.43
   5 -32   0    1.09    0.66
  -5 -32   0    2.28    1.24
  -5  32   0    0.95    0.65
   5  32   0    1.42    0.59
  -6 -32   0    9.78    1.68
   6 -32   0    9.65    1.19
   6  32   0    8.88    0.99
   7  32   0    0.22    0.49
   0 -33   0   -0.12    0.87
   0  33   0    0.25    0.47
   1 -33   0   -1.18    0.75
  -1 -33   0   -0.16    0.92
  -1  33   0    0.19    0.49
   1  33   0   -0.26    0.40
  -2 -33   0    2.42    1.01
  -2  33   0    1.29    0.55
   2  33   0    2.73    0.60
  -3 -33   0    2.38    1.06
   3 -33   0    1.69    0.55
  -3  33   0    1.05    0.60
   3  33   0    1.29    0.59
   4 -33   0    9.48    1.02
  -4 -33   0    8.46    1.58
  -4  33   0    7.05    0.92
   4  33   0   10.99    1.04
   5 -33   0    0.37    0.58
  -5 -33   0    0.01    1.15
  -5  33   0   -0.71    0.55
   5  33   0   -0.28    0.46
   6 -33   0    1.26    0.70
  -6 -33   0    3.75    1.41
   6  33   0    1.36    0.58
   0 -34   0    2.28    1.02
   0  34   0    2.36    0.60
   1 -34   0   -0.95    0.82
  -1 -34   0   -0.15    0.95
  -1  34   0   -0.57    0.43
   1  34   0   -0.33    0.46
  -2 -34   0    1.62    1.10
  -2  34   0    0.97    0.58
   2  34   0    1.06    0.55
  -3 -34   0    0.09    0.92
   3  34   0    0.02    0.43
  -3  34   0    0.27    0.57
  -4 -34   0    0.90    1.05
   4 -34   0    0.01    0.50
  -4  34   0   -0.59    0.57
   4  34   0   -0.56    0.45
   5 -34   0    0.30    0.58
  -5 -34   0    1.43    1.31
  -5  34   0    1.16    0.64
   5  34   0    0.41    0.52
  -6 -34   0    2.03    1.21
   6 -34   0    1.06    0.68
   6  34   0    0.73    0.57
   0 -35   0   -1.71    0.81
   0  35   0   -0.19    0.50
   1 -35   0    1.08    0.97
  -1 -35   0    2.75    1.15
  -1  35   0    1.33    0.62
   1  35   0    3.07    0.70
  -2 -35   0    8.59    1.45
   2  35   0    6.97    0.91
  -2  35   0    4.73    0.78
  -3 -35   0    2.51    1.21
   3  35   0    0.08    0.52
  -3  35   0   -0.25    0.56
   4 -35   0    1.41    0.59
  -4 -35   0    1.57    1.13
   4  35   0    0.32    0.50
  -4  35   0    1.11    0.73
  -5 -35   0    1.20    1.25
   5 -35   0   -0.15    0.55
   5  35   0   -0.40    0.43
  -5  35   0   -1.00    0.56
   6 -35   0    0.14    0.60
   6  35   0    0.03    0.50
   0  36   0    0.48    0.52
  -1 -36   0   -0.01    0.92
   1  36   0   -0.69    0.48
  -1  36   0    0.69    0.60
  -2 -36   0    7.14    1.47
   2  36   0    7.12    0.91
  -2  36   0    5.60    0.88
  -3 -36   0    0.73    1.16
   3  36   0    0.15    0.53
  -3  36   0    0.17    0.56
  -4 -36   0    0.79    1.24
  -4  36   0    1.00    0.67
   4  36   0    0.45    0.55
  -5 -36   0    3.75    1.33
   5 -36   0    1.76    0.69
   5  36   0    0.86    0.55
  -5  36   0    1.67    0.73
   0 -37   0   -2.18    0.96
   0  37   0    0.07    0.55
  -1 -37   0   -0.93    0.89
  -1  37   0    0.10    0.55
   1  37   0    0.98    0.59
  -2 -37   0   -0.39    1.10
  -2  37   0   -0.24    0.53
   2  37   0    0.01    0.53
  -3 -37   0    5.25    1.48
  -3  37   0    5.37    0.92
   3  37   0    3.78    0.75
  -4 -37   0   -1.08    1.17
  -4  37   0   -0.34    0.56
   4  37   0    0.13    0.53
  -5 -37   0    0.62    1.19
   5  37   0   -0.41    0.47
  -5  37   0   -0.78    0.60
   0 -38   0   -0.28    1.15
   0  38   0    2.43    0.69
  -1 -38   0   -0.50    1.06
  -1  38   0    0.13    0.55
   1  38   0    0.87    0.57
  -2 -38   0   -1.50    0.95
  -2  38   0    0.00    0.55
   2  38   0   -0.27    0.51
  -3 -38   0    0.49    1.06
  -3  38   0   -0.09    0.58
   3  38   0    0.61    0.52
  -4 -38   0   -0.18    1.21
  -4  38   0    0.05    0.64
   4  38   0   -0.10    0.49
  -5  38   0   -0.45    0.65
   0 -39   0   -4.13    1.58
   0  39   0    0.26    0.59
  -1 -39   0   -0.72    1.17
   1  39   0    2.93    0.79
  -1  39   0    2.96    0.78
  -2 -39   0   -2.19    1.13
  -2  39   0    0.36    0.62
   2  39   0   -0.19    0.51
  -3 -39   0   -1.40    1.03
  -3  39   0   -0.51    0.57
   3  39   0    0.40    0.52
  -4 -39   0    0.63    1.25
   4  39   0    1.47    0.64
  -4  39   0    1.00    0.73
   0  40   0    0.21    0.56
   1  40   0    0.57    0.61
  -1  40   0    0.42    0.61
  -2 -40   0   -2.67    1.20
  -2  40   0   -0.14    0.60
   2  40   0   -0.32    0.51
  -3 -40   0   -0.79    1.31
   3  40   0    1.14    0.61
  -3  40   0    0.74    0.68
  -4 -40   0   -2.13    1.90
  -4  40   0    0.22    0.67
   0  41   0   -0.90    0.50
  -1  41   0   -0.76    0.53
   1  41   0   -0.08    0.53
   2  41   0    0.17    0.53
  -2  41   0   -0.35    0.56
  -3  41   0   -0.21    0.66
   0  42   0   -0.26    0.58
   1  42   0    1.95    0.73
  -1  42   0    1.64    0.67
   2  42   0    0.17    0.71
  -2  42   0    0.43    0.70
   0  43   0   -0.22    0.62
  -1  43   0   -0.37    0.97
   9   0  -1    0.29    0.48
   8   0  -1   -0.40    0.39
   8   0  -1   -1.22    0.55
   7   0  -1   -0.07    0.38
   7   0  -1    0.06    0.51
   6   0  -1   -0.33    0.36
   6   0  -1   -0.45    0.46
   6   0  -1   -0.67    0.32
   5   0  -1    0.60    0.44
   5   0  -1    1.04    0.32
   5   0  -1    0.97    0.38
   4   0  -1   -0.28    0.22
   4   0  -1   -0.04    0.31
   4   0  -1   -0.28    0.23
   3   0  -1   -0.10    0.25
   3   0  -1    0.02    0.21
   3   0  -1   -0.20    0.24
   2   0  -1    0.12    0.21
   2   0  -1    0.01    0.16
   2   0  -1    0.26    0.20
   1   0  -1   -0.06    0.10
  -1   0   1   -0.17    0.12
   1   0  -1    0.00    0.11
   0   0   1   -0.93    0.13
   0   0  -1   -0.99    0.10
   0   0   1   -0.86    0.05
   1   0   1   -0.15    0.26
  -1   0  -1    0.28    0.21
   1   0   1    0.03    0.10
   2   0   1   -0.19    0.12
   2   0   1    0.03    0.26
   3   0   1   -0.14    0.29
   3   0   1    0.06    0.28
   3   0   1    0.02    0.18
   4   0   1   -0.08    0.34
   4   0   1   -0.08    0.27
   4   0   1    0.28    0.21
   5   0   1    0.04    0.38
   5   0   1    0.29    0.42
   5   0   1   -0.19    0.25
  -6   0  -1   -0.03    0.38
   6   0   1    0.08    0.50
   7   0   1    0.06    0.49
  -7   0  -1    0.44    0.46
   8   0   1   -0.21    0.62
  -8   0  -1    0.03    0.45
  -9   0  -1    1.31    0.58
 -10   1   1    1.59    0.73
   9  -1  -1    0.83    0.53
  -9  -1   1    0.47    0.50
   8  -1  -1    7.32    0.84
   8  -1  -1    4.79    0.89
   8   1  -1    4.60    0.90
   8   1  -1    6.00    0.75
   7  -1  -1    3.32    0.68
   7  -1  -1    3.16    0.57
   7   1  -1    3.59    0.53
   7   1  -1    3.63    0.73
   7   1  -1    3.65    0.58
   6  -1  -1    1.15    0.40
   6  -1  -1    1.64    0.47
   6  -1  -1    2.14    0.55
   6   1  -1    2.14    0.48
   6   1  -1    1.75    0.42
   6   1  -1    1.81    0.57
   5  -1  -1    1.87    0.37
   5  -1  -1    1.82    0.47
   5  -1  -1    1.30    0.42
   5   1  -1    2.78    0.57
   5   1  -1    1.88    0.41
   5   1  -1    2.47    0.39
   4  -1  -1    0.23    0.31
   4  -1  -1    0.18    0.29
   4  -1  -1    0.34    0.25
   4   1  -1    0.12    0.26
   4   1  -1    0.22    0.33
   4   1  -1    0.15    0.24
   3  -1  -1    7.83    0.49
   3  -1  -1    6.81    0.44
   3  -1  -1    7.28    0.44
   3   1  -1    7.45    0.44
   3   1  -1    6.51    0.45
   3   1  -1    6.73    0.53
   2  -1  -1    4.90    0.35
   2  -1  -1    4.73    0.35
   2  -1  -1    4.76    0.34
   2   1  -1    5.15    0.32
   2   1  -1    3.98    0.34
   2   1  -1    4.91    0.39
   1  -1  -1    4.87    0.20
   1  -1  -1    5.20    0.27
   1  -1  -1    4.77    0.23
  -1  -1   1    6.35    0.31
  -1   1   1    5.54    0.22
   1   1  -1    4.72    0.24
   1   1  -1    6.01    0.22
   0  -1   1   81.95    1.10
   0  -1   1   82.67    1.59
   0  -1  -1   85.82    1.27
   0   1   1   74.73    1.56
   0   1  -1   84.54    1.26
   0   1  -1   84.03    1.10
   1  -1   1   29.89    0.88
  -1  -1  -1   29.23    0.67
   1  -1   1   28.74    0.47
   1  -1   1   30.31    0.70
   1   1   1   29.14    0.86
   1   1   1   28.14    0.50
   2  -1   1    0.49    0.15
   2  -1   1    0.34    0.24
   2  -1   1    0.52    0.28
   2   1   1    0.40    0.29
   2   1   1    0.62    0.15
   3  -1   1    0.87    0.20
   3  -1   1    1.36    0.38
   3  -1   1    0.68    0.29
   3   1   1    1.06    0.22
   3   1   1    1.20    0.42
   3   1   1    1.24    0.30
   4  -1   1    0.65    0.31
   4  -1   1   -0.05    0.19
   4  -1   1    0.65    0.36
   4   1   1    0.20    0.27
   4   1   1   -0.09    0.35
   4   1   1    0.40    0.22
   5  -1   1    0.12    0.46
   5  -1   1    0.45    0.35
   5   1   1   -0.07    0.25
   5   1   1    0.21    0.36
   5   1   1   -0.03    0.42
  -6  -1  -1   -0.41    0.37
   6  -1   1    0.06    0.45
   6  -1   1   -0.08    0.40
   6   1   1    1.03    0.52
   6   1   1   -0.28    0.28
   7  -1   1    3.06    0.72
  -7  -1  -1    2.67    0.58
   7   1   1    3.32    0.77
  -7   1  -1    3.32    0.65
   8  -1   1    1.44    0.70
  -8  -1  -1    1.08    0.53
   8   1   1    0.61    0.69
  -8   1  -1    0.92    0.56
   9   1   1   -0.51    0.74
  -9   1  -1    1.59    0.63
 -10   2   1    1.63    0.61
  -9  -2   1    0.89    0.49
   9  -2  -1    1.51    0.59
   8  -2  -1   -0.31    0.54
   8  -2  -1    0.65    0.49
  -8  -2   1    1.63    0.57
   8   2  -1    1.51    0.48
   7  -2  -1    5.03    0.74
   7  -2  -1    4.62    0.66
   7   2  -1    4.73    0.63
   7   2  -1    3.15    0.72
   7   2  -1    4.70    0.58
   6  -2  -1    0.10    0.42
   6  -2  -1    0.27    0.43
   6   2  -1   -0.04    0.50
   6   2  -1   -0.05    0.35
   6   2  -1   -0.19    0.33
   5  -2  -1    0.61    0.31
   5  -2  -1   -0.02    0.38
   5  -2  -1    0.17    0.35
   5   2  -1    0.91    0.35
   5   2  -1    1.57    0.52
   5   2  -1    0.85    0.35
   4  -2  -1    2.07    0.36
   4  -2  -1    2.29    0.38
   4  -2  -1    2.30    0.32
   4   2  -1    1.95    0.33
   4   2  -1    2.19    0.33
   4   2  -1    2.24    0.41
   3  -2  -1    1.94    0.31
   3  -2  -1    2.03    0.28
   3  -2  -1    1.88    0.29
   3   2  -1    2.30    0.28
   3   2  -1    1.46    0.25
   3   2  -1    2.18    0.38
   2  -2  -1    0.63    0.21
  -2  -2   1   -0.12    0.26
   2  -2  -1    0.02    0.17
   2  -2  -1    0.78    0.24
   2   2  -1    0.41    0.19
   2   2  -1   -0.10    0.20
   1  -2  -1  971.04   14.08
  -1  -2   1  960.65   18.08
   1   2  -1 1000.00   13.81
   1   2  -1  974.80   13.36
   0  -2  -1   38.70    0.69
   0  -2   1   38.41    0.88
   0  -2   1   41.68    0.61
   0   2   1   36.76    0.84
   0   2  -1   39.25    0.68
   0   2  -1   38.83    0.58
   0   2   1   38.94    0.61
   1  -2   1  522.16    9.81
  -1  -2  -1  513.44    7.84
   1  -2   1  531.13    7.82
   1   2   1  534.87    9.48
   1   2   1  519.12    7.21
   2  -2   1   11.22    0.52
  -2  -2  -1   10.79    0.50
   2  -2   1   11.24    0.60
   2   2   1   11.47    0.68
   2   2   1   11.45    0.38
   3  -2   1    0.01    0.27
   3  -2   1    0.04    0.26
   3   2   1    0.06    0.33
   3   2   1    0.47    0.26
   3   2   1    0.10    0.18
   4  -2   1    0.75    0.37
   4  -2   1    0.83    0.42
   4   2   1    0.55    0.41
   4   2   1    0.37    0.32
   4   2   1    0.49    0.23
   5  -2   1    2.53    0.59
  -5  -2  -1    2.23    0.46
   5  -2   1    2.47    0.50
   5   2   1    1.84    0.34
   5   2   1    2.64    0.65
  -6  -2  -1    0.60    0.40
   6  -2   1    0.21    0.47
   6  -2   1    0.37    0.44
   6   2   1   -0.14    0.28
   6   2   1   -0.11    0.54
   7  -2   1    4.22    0.78
  -7  -2  -1    4.05    0.65
  -7   2  -1    4.25    0.74
   7   2   1    4.67    0.90
  -8  -2  -1    1.20    0.53
   8  -2   1    1.33    0.70
   8   2   1    0.31    0.64
  -8   2  -1   -0.34    0.47
  -9  -2  -1    1.30    0.56
   9   2   1   -1.87    0.70
  -9   2  -1    1.03    0.58
 -10   3   1    0.57    0.54
  -9  -3   1    1.87    0.85
   9  -3  -1    1.54    0.56
  -8  -3   1    2.13    0.59
   8  -3  -1    0.82    0.52
   8   3  -1    0.14    0.44
   8   3  -1    0.65    0.43
   7  -3  -1    2.61    0.62
   7  -3  -1    2.16    0.55
   7   3  -1    1.83    0.49
   7   3  -1    2.62    0.48
   7   3  -1    2.25    0.71
   6  -3  -1    1.32    0.47
   6  -3  -1    0.55    0.45
   6   3  -1    1.28    0.56
   6   3  -1    1.58    0.42
   6   3  -1    1.07    0.40
   5  -3  -1    0.38    0.37
   5  -3  -1   -0.26    0.33
   5   3  -1   -0.11    0.31
   5   3  -1    0.39    0.32
   5   3  -1    0.64    0.53
   4  -3  -1    1.75    0.34
   4  -3  -1    2.09    0.40
   4   3  -1    1.95    0.46
   4   3  -1    1.69    0.31
   4   3  -1    1.81    0.30
   3  -3  -1    3.81    0.40
   3  -3  -1    4.34    0.39
   3   3  -1    4.07    0.37
   3   3  -1    4.08    0.53
   3   3  -1    4.26    0.37
   2  -3  -1   24.42    0.68
  -2  -3   1   25.80    0.88
   2  -3  -1   25.15    0.63
   2   3  -1   23.93    0.62
   2   3  -1   24.57    0.56
   1  -3  -1   13.42    0.43
  -1  -3   1   13.05    0.53
   1   3  -1   13.27    0.30
   1   3  -1   13.29    0.37
   0   3   1    0.15    0.11
   0   3  -1   -0.28    0.12
   0   3  -1   -0.31    0.10
   0   3   1    0.10    0.16
  -1  -3  -1    1.21    0.21
   1  -3   1    1.80    0.31
   1  -3   1    1.27    0.23
   1   3   1    1.56    0.16
   1   3   1    1.35    0.29
   2  -3   1    0.10    0.24
   2  -3   1   -0.31    0.23
  -2  -3  -1   -0.36    0.19
   2   3   1   -0.26    0.28
   2   3   1   -0.11    0.15
   3  -3   1    0.27    0.28
   3  -3   1    0.30    0.28
  -3  -3  -1    0.04    0.26
   3   3   1    0.17    0.37
   3   3   1    0.89    0.21
   4  -3   1    0.69    0.39
  -4  -3  -1    0.52    0.30
   4  -3   1    0.88    0.38
   4   3   1    1.08    0.45
   4   3   1    0.50    0.24
   5  -3   1    7.16    0.80
   5  -3   1    7.22    0.74
  -5  -3  -1    7.38    0.65
   5   3   1    7.75    0.56
   5   3   1    6.75    0.90
   6  -3   1    4.54    0.72
   6  -3   1    4.23    0.60
  -6  -3  -1    4.93    0.62
   6   3   1    6.05    0.90
   6   3   1    4.86    0.49
   7  -3   1    3.20    0.72
  -7  -3  -1    4.80    0.65
   7   3   1    2.26    0.77
   7   3   1    2.55    0.47
  -8  -3  -1    1.29    0.51
   8  -3   1    1.21    0.66
   8   3   1    0.25    0.70
  -8   3  -1    0.82    0.56
  -9   3  -1    0.82    0.59
   9   3   1   -1.06    0.77
 -10   4   1    2.06    0.66
  -9  -4   1    2.14    0.71
   9  -4  -1    0.18    0.53
   8  -4  -1    0.82    0.48
  -8  -4   1    1.73    0.64
   8   4  -1    0.12    0.44
   7  -4  -1   15.63    1.02
   7  -4  -1   14.79    1.03
   7   4  -1   14.03    0.85
   7   4  -1   14.44    0.87
   7   4  -1   13.78    1.22
   6  -4  -1   22.24    1.10
   6  -4  -1   22.94    1.10
   6   4  -1   23.40    1.29
   6   4  -1   23.61    0.97
   6   4  -1   22.80    0.98
   5  -4  -1   10.66    0.71
   5  -4  -1    9.99    0.73
   5   4  -1   10.66    0.86
   5   4  -1   10.72    0.63
   5   4  -1   10.27    0.71
   4  -4  -1   18.35    0.76
   4  -4  -1   18.83    0.77
   4   4  -1   17.55    0.89
   4   4  -1   19.09    0.66
   4   4  -1   19.26    0.71
   3  -4  -1    0.16    0.29
   3  -4  -1   -0.34    0.19
   3   4  -1   -0.09    0.19
   3   4  -1   -0.07    0.24
   3   4  -1    0.21    0.36
   2  -4  -1  130.78    2.17
  -2  -4   1  131.93    2.74
   2  -4  -1  132.95    2.42
   2   4  -1  129.86    1.96
   2   4  -1  132.75    2.04
  -1  -4   1  199.71    3.76
   1  -4  -1  201.34    2.95
   1  -4  -1  194.33    3.52
  -1  -4   1  203.95    2.81
   1   4  -1  198.66    2.80
   1   4  -1  203.58    2.80
   0  -4   1   57.03    1.24
   0  -4  -1   52.03    0.94
   0   4  -1   52.70    0.87
   0   4   1   53.88    1.16
   0   4   1   54.30    0.90
   0   4  -1   55.22    0.93
   1  -4   1   61.43    1.41
   1  -4   1   61.31    1.15
  -1  -4  -1   61.18    1.07
   1   4   1   59.90    1.00
   1   4   1   60.96    1.45
  -1   4  -1   60.28    0.95
   2  -4   1    0.05    0.24
  -2  -4  -1   -0.11    0.20
   2  -4   1    0.46    0.26
   2   4   1    0.31    0.17
   2   4   1   -0.14    0.35
   3  -4   1    1.78    0.37
  -3  -4  -1    1.19    0.29
   3  -4   1    1.28    0.34
   3   4   1    1.52    0.25
   3   4   1    1.10    0.44
  -4  -4  -1   41.01    1.13
   4  -4   1   41.87    1.26
   4  -4   1   41.84    1.44
   4   4   1   38.87    0.98
   4   4   1   41.91    1.55
   5  -4   1   16.63    0.99
  -5  -4  -1   16.83    0.83
   5  -4   1   17.79    0.94
   5   4   1   16.92    0.73
   5   4   1   16.43    1.20
  -6  -4  -1   12.73    0.82
   6  -4   1   13.77    1.04
   6  -4   1   14.14    0.97
   6   4   1   11.96    1.08
   6   4   1   12.39    0.71
   7  -4   1    6.61    0.79
   7  -4   1    5.85    0.85
  -7  -4  -1    6.33    0.73
   7   4   1    6.09    0.61
   7   4   1    6.51    1.02
  -8  -4  -1    0.84    0.47
   8  -4   1    1.13    0.61
  -8   4  -1   -0.42    0.53
   8   4   1   -0.45    0.73
   9   4   1   -0.09    0.93
  -9   4  -1    2.98    0.74
 -10   5   1    2.33    0.70
   9  -5  -1    0.14    0.54
  -8  -5   1    3.39    0.78
  -8  -5   1    1.98    0.49
   8  -5  -1    2.18    0.62
   8   5  -1    2.20    0.54
   7  -5  -1    3.55    0.62
  -7  -5   1    3.83    0.78
   7  -5  -1    3.05    0.63
   7   5  -1    3.82    0.55
   7   5  -1    3.37    0.52
   6  -5  -1    4.73    0.62
   6  -5  -1    5.39    0.68
   6   5  -1    4.56    0.79
   6   5  -1    4.87    0.55
   6   5  -1    4.31    0.52
   5  -5  -1    5.08    0.61
   5  -5  -1    4.81    0.55
   5   5  -1    4.96    0.50
   5   5  -1    6.95    0.80
   5   5  -1    5.41    0.55
   4  -5  -1    8.92    0.60
   4  -5  -1    8.50    0.54
   4   5  -1    9.37    0.50
   4   5  -1    8.72    0.79
   4   5  -1    9.04    0.57
   3  -5  -1   77.81    1.65
  -3  -5   1   75.93    1.98
   3   5  -1   75.86    1.46
   3   5  -1   78.53    1.37
  -2  -5   1   35.02    1.12
   2  -5  -1   33.32    0.85
   2  -5  -1   34.24    0.75
   2   5  -1   32.90    0.77
   2   5  -1   33.15    0.62
   1  -5  -1   31.43    0.67
   1  -5  -1   30.41    0.70
  -1  -5   1   30.92    0.96
  -1  -5   1   30.48    0.48
   1   5  -1   31.89    0.49
  -1   5   1   31.14    0.67
   1   5  -1   29.51    0.66
   0  -5   1   76.44    1.23
   0  -5  -1   76.15    1.26
   0  -5   1   79.60    1.71
   0   5   1   76.42    1.23
   0   5   1   72.33    1.56
   0   5  -1   75.07    1.19
   1  -5   1  161.52    3.14
  -1  -5  -1  165.71    2.43
   1  -5   1  160.94    2.53
   1   5   1  164.70    2.34
  -1   5  -1  160.00    2.26
   1   5   1  159.61    3.20
   2  -5   1   46.31    1.11
  -2  -5  -1   46.17    0.98
   2  -5   1   46.53    1.28
   2   5   1   48.04    0.92
   2   5   1   47.84    1.40
  -3  -5  -1    4.27    0.41
   3  -5   1    4.74    0.50
   3  -5   1    4.99    0.52
   3   5   1    4.92    0.66
   3   5   1    5.27    0.39
   4  -5   1    0.94    0.39
  -4  -5  -1    0.69    0.29
   4  -5   1    0.83    0.34
   4   5   1    0.36    0.44
   4   5   1    0.79    0.26
   5  -5   1   -0.62    0.38
  -5  -5  -1    0.06    0.31
   5  -5   1   -0.31    0.39
   5   5   1    0.20    0.52
   5   5   1    0.26    0.29
  -6  -5  -1    1.18    0.41
   6  -5   1    0.92    0.46
   6  -5   1    1.02    0.49
   6   5   1    0.54    0.64
   6   5   1    1.01    0.34
   7  -5   1    5.98    0.81
  -7  -5  -1    5.62    0.68
   7  -5   1    5.36    0.83
   7   5   1    4.51    0.55
   7   5   1    5.44    0.99
  -8  -5  -1    0.66    0.46
   8  -5   1    0.78    0.58
  -8   5  -1   -0.18    0.52
   8   5   1   -0.54    0.76
   9   5   1   -1.95    0.84
  -9   5  -1    1.35    0.62
  10  -6  -1    1.37    0.61
   9  -6  -1    4.69    0.82
   9   6  -1    5.00    0.77
   8  -6  -1   -0.16    0.47
  -8  -6   1    1.66    0.66
  -8  -6   1    0.50    0.39
   8   6  -1    1.00    0.48
   7  -6  -1    0.05    0.43
  -7  -6   1    1.52    0.64
   7  -6  -1    0.36    0.41
   7   6  -1    0.76    0.43
   7   6  -1    0.18    0.36
   6  -6  -1   14.65    0.88
   6  -6  -1   15.87    0.97
   6   6  -1   16.12    0.87
   6   6  -1   15.15    1.11
   6   6  -1   15.15    0.76
   5  -6  -1    7.17    0.63
   5  -6  -1    9.08    0.78
   5   6  -1   10.45    1.02
   5   6  -1    8.50    0.57
   5   6  -1    9.52    0.69
   4  -6  -1   55.34    1.41
   4  -6  -1   55.25    1.42
   4   6  -1   55.59    1.28
   4   6  -1   57.03    1.75
   4   6  -1   55.72    1.18
   3  -6  -1    0.50    0.29
   3  -6  -1    0.01    0.18
  -3  -6   1   -0.53    0.36
   3   6  -1   -0.36    0.25
   3   6  -1    0.27    0.18
   2  -6  -1   92.16    1.75
  -2  -6   1   90.86    2.13
   2  -6  -1   92.22    1.69
   2   6  -1   93.19    1.58
   2   6  -1   92.69    1.38
   1  -6  -1   51.70    1.01
   1  -6  -1   52.18    1.07
  -1  -6   1   51.15    1.35
   1   6  -1   52.32    0.75
   1   6  -1   53.56    0.97
   1   6  -1   53.32    0.75
   0  -6   1   36.68    0.83
   0  -6  -1   45.17    0.87
   0   6   1   43.07    0.84
   0   6  -1   50.18    0.83
   0   6   1   40.29    1.08
   1  -6   1   95.22    2.06
  -1  -6  -1   98.28    1.56
   1  -6   1   99.14    1.69
  -1   6  -1   97.65    1.48
   1   6   1   98.42    1.55
   1   6   1   91.86    2.10
   2  -6   1    4.72    0.47
  -2  -6  -1    4.28    0.36
   2  -6   1    4.03    0.43
   2   6   1    4.68    0.35
   2   6   1    4.87    0.59
   3  -6   1    0.82    0.33
   3  -6   1    0.81    0.35
  -3  -6  -1    0.60    0.25
   3   6   1    0.81    0.23
   3   6   1    0.63    0.44
   4  -6   1   18.24    0.94
   4  -6   1   17.82    0.85
  -4  -6  -1   18.53    0.73
   4   6   1   20.66    1.19
   4   6   1   18.65    0.68
  -5  -6  -1    3.40    0.47
   5  -6   1    2.89    0.58
   5  -6   1    2.53    0.52
   5   6   1    2.43    0.41
   5   6   1    2.58    0.68
   6  -6   1    3.56    0.65
   6  -6   1    3.24    0.62
  -6  -6  -1    3.35    0.52
   6   6   1    2.54    0.42
   6   6   1    2.47    0.71
   7  -6   1   15.96    1.14
   7  -6   1   16.85    1.16
  -7  -6  -1   18.11    1.01
   7   6   1   17.65    0.89
   7   6   1   16.13    1.36
  -8  -6  -1    9.69    0.87
   8  -6   1   10.33    1.28
   8   6   1    7.42    1.20
  -8   6  -1    7.91    0.96
  -9   6  -1    1.94    0.67
  10  -7  -1    1.00    0.62
  -9  -7   1    2.81    0.80
   9  -7  -1    0.36    0.54
   9   7  -1   -0.56    0.47
  -8  -7   1   14.53    1.36
   8  -7  -1   10.98    1.03
   8   7  -1   11.99    0.95
   7  -7  -1   11.30    0.99
  -7  -7   1   12.11    0.76
   7  -7  -1   10.87    1.01
  -7  -7   1   11.21    1.20
   7   7  -1   12.02    0.85
   6  -7  -1   11.72    0.92
  -6  -7   1    9.45    1.07
   6  -7  -1   11.73    0.78
   6   7  -1   10.75    0.66
   6   7  -1   10.66    0.77
  -5  -7   1    1.45    0.59
   5  -7  -1    0.85    0.42
   5  -7  -1    0.96    0.36
   5   7  -1    2.38    0.41
   5   7  -1    0.72    0.33
   4  -7  -1    0.36    0.36
  -4  -7   1   -0.09    0.38
   4  -7  -1    0.09    0.22
   4   7  -1    0.09    0.20
   4   7  -1    0.21    0.26
   3  -7  -1   15.13    0.56
  -3  -7   1   13.76    0.86
   3  -7  -1   15.48    0.67
   3   7  -1   15.14    0.61
   3   7  -1   14.66    0.45
  -2  -7   1   36.20    1.22
   2  -7  -1   35.82    0.82
   2  -7  -1   35.85    0.95
   2   7  -1   36.66    0.87
   2   7  -1   34.39    0.59
   1  -7  -1    0.56    0.25
  -1  -7   1   -0.04    0.36
   1  -7  -1    0.63    0.21
  -1   7   1    0.44    0.20
   1   7  -1    0.49    0.19
   1   7  -1    0.55    0.07
   0  -7  -1   13.98    0.52
   0  -7   1   16.13    0.45
   0   7   1   15.20    0.59
   0   7   1   14.92    0.50
   0   7  -1   15.82    0.48
   1  -7   1    5.34    0.48
   1  -7   1    3.65    0.38
  -1  -7  -1    4.78    0.32
   1   7   1    4.97    0.34
   1   7   1    4.47    0.50
  -1   7  -1    5.11    0.31
   2  -7   1   49.12    1.35
  -2  -7  -1   49.97    1.02
   2  -7   1   50.94    1.19
   2   7   1   50.11    1.03
   2   7   1   49.49    1.50
   3  -7   1   -0.23    0.27
   3  -7   1    0.05    0.26
  -3  -7  -1   -0.13    0.20
   3   7   1    0.11    0.21
   3   7   1   -0.21    0.40
  -4  -7  -1    0.04    0.25
   4  -7   1    0.31    0.37
   4  -7   1    0.10    0.32
   4   7   1   -0.13    0.45
   4   7   1    0.52    0.26
   5  -7   1    5.44    0.68
  -5  -7  -1    5.73    0.56
   5  -7   1    5.00    0.63
   5   7   1    5.98    0.54
   5   7   1    6.63    0.90
   6  -7   1    5.57    0.74
   6  -7   1    6.41    0.80
  -6  -7  -1    6.79    0.67
   6   7   1    5.57    0.96
   6   7   1    5.11    0.54
   7  -7   1    5.42    0.80
   7  -7   1    4.62    0.77
  -7  -7  -1    4.59    0.64
   7   7   1    4.21    0.56
   7   7   1    4.21    0.91
  -8   7  -1    0.55    0.54
   8   7   1    0.51    0.75
  -9  -7  -1    4.07    0.92
  -9   7  -1    1.25    0.67
  10  -8  -1    0.41    0.57
   9  -8  -1    4.61    0.88
   9   8  -1    4.81    0.75
  -8  -8   1    1.75    0.74
   8  -8  -1    0.37    0.48
   8   8  -1    0.55    0.45
   7  -8  -1   11.77    1.01
  -7  -8   1   12.06    0.74
  -7  -8   1   13.76    1.25
   7   8  -1   13.27    0.87
   6  -8  -1    9.07    0.69
  -6  -8   1    9.13    1.12
   6  -8  -1    8.63    0.87
   6   8  -1    9.37    0.77
  -5  -8   1    0.83    0.52
   5  -8  -1    0.15    0.30
   5  -8  -1    1.02    0.46
   5   8  -1    1.34    0.37
   5   8  -1    0.74    0.29
   4  -8  -1    0.31    0.32
   4  -8  -1    0.14    0.21
  -4  -8   1   -0.26    0.46
   4   8  -1   -0.14    0.25
   4   8  -1   -0.02    0.17
  -3  -8   1   30.19    1.28
   3  -8  -1   29.86    0.82
   3  -8  -1   28.96    0.92
   3   8  -1   29.19    0.85
   3   8  -1   30.07    0.64
   2  -8  -1   93.91    1.82
   2  -8  -1   91.70    1.73
  -2  -8   1   94.96    1.32
  -2  -8   1   92.61    2.25
   2   8  -1   93.25    1.66
   1  -8  -1  162.33    2.54
   1  -8  -1  159.32    3.00
  -1  -8   1  155.30    3.27
   1   8  -1  160.07    2.21
   1   8  -1  163.19    2.22
   1   8  -1  165.62    2.45
  -1   8   1  161.43    2.45
   0  -8  -1    9.04    0.41
   0  -8   1    8.56    0.35
   0  -8  -1    7.72    0.48
   0  -8   1    9.34    0.66
   0   8   1    8.48    0.40
   0   8  -1    8.98    0.40
   1  -8   1   90.02    2.02
  -1  -8  -1   91.21    1.49
   1  -8   1   90.77    1.62
   1   8   1   89.58    2.08
  -1   8  -1   90.76    1.49
   1   8   1   92.74    1.55
   2  -8   1   59.76    1.35
   2  -8   1   59.66    1.55
  -2  -8  -1   59.69    1.15
   2   8   1   60.74    1.73
   2   8   1   60.34    1.19
  -2   8  -1   60.21    1.16
  -3  -8  -1   11.23    0.53
   3  -8   1   11.84    0.68
   3  -8   1   12.28    0.73
   3   8   1   13.43    0.94
   3   8   1   11.77    0.54
  -4  -8  -1    0.58    0.26
   4  -8   1    0.69    0.35
   4  -8   1    0.35    0.38
   4   8   1   -0.24    0.48
   4   8   1    0.20    0.25
   5  -8   1   -0.34    0.40
   5  -8   1   -0.48    0.38
  -5  -8  -1   -0.12    0.29
   5   8   1   -0.44    0.31
   5   8   1    0.38    0.58
   6  -8   1   29.81    1.38
  -6  -8  -1   31.72    1.14
   6  -8   1   30.07    1.40
   6   8   1   31.14    1.69
   6   8   1   32.32    1.10
  -7  -8  -1    2.46    0.50
   7  -8   1    2.43    0.63
   7  -8   1    2.13    0.66
   7   8   1    1.71    0.45
   7   8   1    2.15    0.80
   8   8   1    2.04    0.92
  -8   8  -1    3.89    0.78
  -9  -8  -1    4.62    1.03
  -9   8  -1    0.24    0.57
  10  -9  -1    0.30    0.57
  -9  -9   1    4.03    0.91
   9  -9  -1    1.84    0.73
   9   9  -1    0.76    0.55
   8  -9  -1    1.28    0.63
  -8  -9   1    2.94    0.87
   8   9  -1    0.87    0.49
  -7  -9   1    0.38    0.59
   7  -9  -1    0.06    0.49
   7   9  -1    0.33    0.40
   6  -9  -1   12.30    0.89
  -6  -9   1   11.82    0.67
  -6  -9   1   11.09    1.07
   6  -9  -1   12.34    0.77
   6   9  -1   11.97    0.81
   5  -9  -1    0.47    0.31
  -5  -9   1    0.72    0.60
   5  -9  -1    0.01    0.38
   5   9  -1    0.59    0.34
   4  -9  -1    0.14    0.21
  -4  -9   1   -0.21    0.46
   4  -9  -1   -0.11    0.35
   4   9  -1   -0.13    0.26
  -3  -9   1   10.50    0.89
   3  -9  -1   11.99    0.51
   3  -9  -1   12.66    0.66
  -3  -9   1   12.75    0.38
   3   9  -1   12.83    0.62
   2  -9  -1    3.34    0.34
  -2  -9   1    3.10    0.55
   2  -9  -1    2.42    0.36
   2   9  -1    2.68    0.31
   1  -9  -1    7.49    0.50
   1  -9  -1    7.92    0.45
  -1  -9   1    5.17    0.60
   1   9  -1    6.91    0.42
  -1   9   1    7.84    0.45
   1   9  -1    6.96    0.18
   1   9  -1    7.37    0.20
   0  -9  -1  115.90    1.84
   0  -9   1  112.13    2.50
   0  -9  -1  115.28    2.42
   0  -9   1  117.85    1.82
   0   9  -1  115.60    1.84
   0   9   1  114.59    1.88
  -1  -9  -1   10.13    0.43
   1  -9   1   10.52    0.63
   1  -9   1   10.25    0.50
  -1   9  -1    9.96    0.46
   1   9   1   10.70    0.45
   1   9   1   10.48    0.64
   2  -9   1   55.35    1.29
  -2  -9  -1   56.43    1.10
   2  -9   1   55.11    1.50
  -2   9  -1   57.75    1.13
   2   9   1   57.87    1.69
   2   9   1   55.77    1.17
   3  -9   1   29.45    1.01
  -3  -9  -1   29.28    0.79
   3  -9   1   29.55    1.09
   3   9   1   30.65    0.85
   3   9   1   30.57    1.35
  -4  -9  -1    6.84    0.51
   4  -9   1    6.52    0.68
   4  -9   1    5.83    0.62
   4   9   1    6.57    0.51
   4   9   1    6.47    0.87
   5  -9   1    1.30    0.45
  -5  -9  -1    1.68    0.39
   5  -9   1    1.31    0.50
   5   9   1    1.18    0.37
   5   9   1    2.02    0.70
   6  -9   1    0.74    0.52
   6  -9   1    0.83    0.44
  -6  -9  -1    0.84    0.36
   6   9   1    0.10    0.67
   6   9   1    1.23    0.36
  -7  -9  -1    0.50    0.38
   7  -9   1    1.27    0.60
   7  -9   1    0.55    0.51
   7   9   1    0.83    0.38
   7   9   1   -0.08    0.74
   8  -9   1    4.03    0.80
   8   9   1    2.34    1.05
  -9   9  -1    0.60    0.61
  10 -10  -1    1.55    0.70
   9 -10  -1    0.71    0.61
  -9 -10   1    1.62    0.70
   9  10  -1    0.02    0.51
   8 -10  -1    2.08    0.69
  -8 -10   1    3.68    0.94
   8  10  -1    2.78    0.58
   7 -10  -1    3.56    0.68
  -7 -10   1    4.08    0.84
   7  10  -1    3.51    0.59
  -6 -10   1    2.86    0.39
   6 -10  -1    3.06    0.47
  -6 -10   1    2.13    0.68
   6 -10  -1    3.52    0.65
   6  10  -1    3.41    0.53
  -5 -10   1   43.18    1.03
   5 -10  -1   42.93    1.29
  -5 -10   1   39.73    1.71
   5 -10  -1   42.50    1.43
   5  10  -1   43.23    1.26
  -4 -10   1    0.45    0.48
   4 -10  -1    0.45    0.22
   4 -10  -1    0.39    0.39
  -4 -10   1    0.51    0.18
   4  10  -1    0.50    0.30
   3 -10  -1    1.51    0.36
  -3 -10   1    0.84    0.51
  -3 -10   1    1.54    0.16
   3 -10  -1    1.47    0.25
   3  10  -1    1.83    0.34
   2 -10  -1   12.09    0.53
   2 -10  -1   12.12    0.61
  -2 -10   1   11.62    0.90
   2  10  -1   12.45    0.55
  -1 -10   1   86.91    2.15
   1 -10  -1   86.91    1.86
   1 -10  -1   88.55    1.59
  -1  10   1   84.86    1.56
   1  10  -1   86.19    1.56
   0 -10  -1    9.90    0.46
   0 -10   1    9.36    0.38
   0 -10  -1    8.09    0.63
   0 -10   1    8.87    0.79
   0  10  -1    9.39    0.44
   0  10   1    9.06    0.51
   1 -10   1    1.21    0.28
  -1 -10  -1    1.29    0.24
   1 -10   1    1.05    0.39
   1  10   1    1.08    0.23
  -1  10  -1    0.69    0.23
   1  10   1    1.24    0.39
  -2 -10  -1   50.33    1.00
   2 -10   1   48.50    1.20
   2 -10   1   48.07    1.40
  -2  10  -1   48.99    1.04
   2  10   1   50.97    1.12
   2  10   1   47.93    1.56
  -3 -10  -1   86.93    1.60
   3 -10   1   84.89    2.14
   3 -10   1   83.60    1.88
   3  10   1   86.97    2.44
   3  10   1   85.13    1.65
  -4 -10  -1    1.25    0.30
   4 -10   1    0.95    0.37
   4 -10   1    1.29    0.46
   4  10   1    0.95    0.63
   4  10   1    1.02    0.31
   5 -10   1   15.95    0.98
  -5 -10  -1   16.47    0.76
   5 -10   1   15.79    0.96
   5  10   1   16.29    1.36
   5  10   1   14.73    0.75
  -6 -10  -1    0.45    0.33
   6 -10   1   -0.18    0.37
   6 -10   1   -0.25    0.48
   6  10   1    0.37    0.68
   6  10   1    0.21    0.33
   7 -10   1    6.63    0.87
   7 -10   1    6.22    0.89
   7  10   1    5.79    0.62
   7  10   1    4.75    1.06
   8 -10   1    2.70    0.70
  -9  10  -1   -0.13    0.55
 -10 -11   1    5.81    1.14
  10 -11  -1    4.87    0.91
  -9 -11   1    2.87    0.81
   9 -11  -1    1.13    0.69
   9  11  -1    1.23    0.60
   8 -11  -1   18.06    1.24
  -8 -11   1   19.84    1.49
   8  11  -1   20.83    1.14
   7 -11  -1    0.59    0.55
  -7 -11   1    0.90    0.67
   7  11  -1    0.81    0.42
   6 -11  -1    1.42    0.50
   6 -11  -1    1.68    0.41
  -6 -11   1    1.59    0.67
  -6 -11   1    1.73    0.40
   6  11  -1    1.54    0.44
  -5 -11   1    9.49    0.49
  -5 -11   1    7.10    0.92
   5 -11  -1    8.29    0.74
   5 -11  -1    7.71    0.57
   5  11  -1    7.71    0.68
  -4 -11   1    1.43    0.56
  -4 -11   1    2.08    0.23
   4 -11  -1    1.84    0.30
   4 -11  -1    1.79    0.47
   4  11  -1    1.40    0.34
  -3 -11   1    0.12    0.48
   3 -11  -1    0.08    0.35
  -3 -11   1    0.19    0.11
   3 -11  -1   -0.10    0.20
   3  11  -1    0.01    0.23
   2 -11  -1   20.40    0.70
   2 -11  -1   19.86    0.75
  -2 -11   1   20.75    1.10
   2  11  -1   20.02    0.69
  -2  11   1   19.69    0.73
   1 -11  -1    2.83    0.34
  -1 -11   1    2.18    0.58
  -1 -11   1    3.35    0.18
   1 -11  -1    4.77    0.53
   1  11  -1    3.46    0.36
  -1  11   1    3.92    0.39
   0 -11  -1  192.26    3.76
   0 -11   1  182.19    3.85
   0 -11  -1  190.18    2.87
   0 -11   1  188.37    2.83
   0  11   1  189.15    2.91
   0  11  -1  188.16    2.87
   1 -11   1   79.30    1.53
  -1 -11  -1   80.24    2.02
   1 -11   1   77.69    1.96
  -1 -11  -1   80.99    1.37
   1  11   1   79.35    1.52
  -1  11  -1   80.46    1.46
   2 -11   1   45.66    1.35
  -2 -11  -1   45.12    0.93
   2 -11   1   42.54    1.16
   2  11   1   46.15    1.08
  -2  11  -1   44.76    1.02
   2  11   1   46.92    1.52
  -3 -11  -1    0.55    0.23
   3 -11   1    0.28    0.32
   3 -11   1    0.26    0.30
  -3  11  -1    0.48    0.27
   3  11   1    0.36    0.46
   3  11   1    0.29    0.24
   4 -11   1   11.82    0.79
   4 -11   1   11.67    0.79
  -4 -11  -1   11.48    0.59
   4  11   1   12.59    1.09
   4  11   1   11.41    0.66
   5 -11   1    8.09    0.79
  -5 -11  -1    9.15    0.61
   5 -11   1    9.54    0.79
   5  11   1    9.29    0.69
   5  11   1    9.60    1.29
   6 -11   1    4.49    0.67
  -6 -11  -1    4.55    0.52
   6 -11   1    3.05    0.63
   6  11   1    4.41    0.53
   6  11   1    2.88    0.89
   7 -11   1    0.42    0.52
   7 -11   1    0.75    0.48
   7  11   1    0.44    0.41
   7  11   1   -0.92    0.78
  -8 -11  -1    2.93    0.92
   8 -11   1   -0.09    0.60
  -9 -11  -1    4.06    1.02
  -9  11  -1    0.51    0.66
  10 -12  -1    0.40    0.57
   9 -12  -1    2.92    0.80
  -9 -12   1    5.15    0.96
   9  12  -1    2.92    0.63
   8 -12  -1    2.56    0.73
  -8 -12   1    4.28    0.97
   8  12  -1    2.39    0.58
   7 -12  -1    0.44    0.57
  -7 -12   1    0.82    0.67
   7  12  -1   -0.10    0.39
   6 -12  -1   -0.20    0.41
  -6 -12   1   -0.04    0.57
   6  12  -1   -0.44    0.33
  -5 -12   1   -0.16    0.64
   5 -12  -1    0.21    0.26
   5 -12  -1    0.00    0.38
  -5 -12   1    0.46    0.21
   5  12  -1   -0.41    0.34
   4 -12  -1   28.12    0.90
   4 -12  -1   28.53    1.13
  -4 -12   1   27.07    1.34
  -4 -12   1   29.41    0.65
   4  12  -1   29.08    1.01
  -3 -12   1    2.40    0.62
   3 -12  -1    2.63    0.36
   3 -12  -1    2.37    0.42
   3  12  -1    1.92    0.32
   2 -12  -1    3.52    0.41
  -2 -12   1    3.39    0.63
   2 -12  -1    3.62    0.45
  -2  12   1    2.71    0.37
   2  12  -1    4.20    0.43
  -1 -12   1    7.62    0.93
  -1 -12   1    7.20    0.26
   1 -12  -1    8.12    0.61
   1 -12  -1    8.78    0.50
   1  12  -1    8.74    0.48
  -1  12   1    8.73    0.57
   0 -12   1    0.11    0.55
   0 -12  -1    0.21    0.37
   0 -12   1    0.67    0.20
   0 -12  -1    1.06    0.27
   0  12   1    0.81    0.29
   0  12  -1    0.61    0.25
   1 -12   1  204.06    3.25
   1 -12   1  201.40    4.13
  -1 -12  -1  205.97    3.04
  -1 -12  -1  208.65    4.24
   1  12   1  204.26    3.17
  -1  12  -1  200.09    3.10
   2 -12   1   10.26    0.70
   2 -12   1   10.30    0.58
  -2 -12  -1   10.07    0.44
   2  12   1   10.63    0.56
   2  12   1   10.15    0.90
  -2  12  -1    9.94    0.54
  -3 -12  -1   -0.14    0.21
   3 -12   1    0.29    0.36
   3 -12   1    0.15    0.31
   3  12   1    0.04    0.23
  -3  12  -1   -0.45    0.24
   3  12   1   -0.01    0.45
  -4 -12  -1   12.16    0.58
   4 -12   1   12.04    0.87
   4 -12   1    9.98    0.76
   4  12   1   11.44    0.66
   4  12   1   12.30    1.11
  -4  12  -1   11.37    0.67
   5 -12   1    0.32    0.36
   5 -12   1   -0.15    0.44
  -5 -12  -1    0.17    0.29
   5  12   1   -0.16    0.29
   5  12   1    0.02    0.59
   6 -12   1    6.21    0.77
   6 -12   1    6.14    0.85
   6  12   1    5.77    0.62
   6  12   1    7.07    1.07
   7 -12   1    6.15    0.90
   7  12   1    4.86    1.07
   7  12   1    6.27    0.68
  -8 -12  -1   13.25    1.64
   8 -12   1    7.93    1.06
  -9  12  -1    0.27    0.64
  10 -13  -1    0.87    0.66
   9 -13  -1    0.88    0.69
  -9 -13   1    2.98    0.88
   9  13  -1    0.73    0.54
  -8 -13   1   13.19    1.42
   8 -13  -1   11.36    1.18
   8  13  -1   11.96    0.97
   7 -13  -1    1.23    0.58
  -7 -13   1    1.40    0.77
   7  13  -1    2.17    0.51
  -6 -13   1    0.17    0.62
   6 -13  -1   -0.05    0.42
   6  13  -1    0.66    0.39
  -5 -13   1    0.10    0.58
   5 -13  -1    1.73    0.50
   5 -13  -1    1.35    0.32
   5  13  -1    0.65    0.40
  -4 -13   1    0.33    0.15
  -4 -13   1   -0.30    0.53
   4 -13  -1    0.44    0.24
   4 -13  -1    0.01    0.37
   4  13  -1    0.03    0.30
   3 -13  -1   -0.15    0.21
  -3 -13   1   -0.69    0.48
   3 -13  -1   -0.02    0.35
   3  13  -1    0.60    0.29
  -2 -13   1   34.81    1.43
   2 -13  -1   35.20    1.01
   2 -13  -1   34.65    1.02
   2  13  -1   33.22    0.98
  -2  13   1   35.55    1.02
   1 -13  -1   29.24    0.83
  -1 -13   1   29.32    1.30
  -1 -13   1   31.87    0.58
   1 -13  -1   29.17    1.02
  -1  13   1   30.80    0.91
   1  13  -1   30.30    0.85
   0 -13  -1    1.83    0.31
   0 -13  -1    1.05    0.48
   0 -13   1    2.36    0.61
   0 -13   1    1.34    0.23
   0  13  -1    1.97    0.30
   0  13   1    1.32    0.33
  -1 -13  -1    8.39    0.76
   1 -13   1    9.62    0.81
   1 -13   1    9.91    0.53
  -1 -13  -1   10.14    0.46
  -1  13  -1   10.24    0.54
   1  13   1    9.23    0.52
  -2 -13  -1    1.45    0.50
   2 -13   1    1.71    0.42
   2 -13   1    1.73    0.36
  -2 -13  -1    1.77    0.26
   2  13   1    1.57    0.31
  -2  13  -1    2.13    0.32
   3 -13   1    4.08    0.55
   3 -13   1    4.02    0.54
  -3 -13  -1    4.03    0.37
  -3  13  -1    4.97    0.50
   3  13   1    4.20    0.44
   3  13   1    4.46    0.71
  -4 -13  -1   17.47    0.67
   4 -13   1   15.15    0.91
   4 -13   1   16.29    0.93
  -4  13  -1   18.24    0.84
   4  13   1   17.04    1.24
   4  13   1   15.82    0.77
   5 -13   1    0.78    0.50
   5 -13   1    0.39    0.37
  -5 -13  -1    0.86    0.32
   5  13   1    0.39    0.31
   5  13   1   -0.47    0.61
   6 -13   1    0.62    0.42
   6 -13   1    0.76    0.49
   6  13   1    0.37    0.36
   6  13   1   -0.68    0.77
   7 -13   1    1.09    0.58
  -7 -13  -1    2.03    0.77
   7  13   1    1.39    0.43
  -8 -13  -1    2.72    1.01
   8 -13   1    1.82    0.73
  -9  13  -1    0.72    0.70
 -10 -14   1    4.03    0.86
  -9 -14   1    4.89    0.97
   9 -14  -1    6.47    1.01
   9  14  -1    6.32    0.86
  -8 -14   1    2.11    0.79
   8 -14  -1    1.35    0.62
   8  14  -1    1.96    0.56
   7 -14  -1    2.94    0.68
  -7 -14   1    3.53    0.94
   7  14  -1    3.51    0.59
  -6 -14   1    1.26    0.72
   6 -14  -1    0.70    0.47
   6  14  -1    0.51    0.37
   5 -14  -1   21.70    0.85
  -5 -14   1   19.83    1.39
   5 -14  -1   21.34    1.12
   5  14  -1   21.15    0.93
   4 -14  -1   25.15    0.87
   4 -14  -1   25.66    1.11
  -4 -14   1   25.07    0.56
  -4 -14   1   23.23    1.37
   4  14  -1   25.18    0.98
   3 -14  -1    2.63    0.35
  -3 -14   1    1.86    0.63
   3 -14  -1    2.64    0.48
  -3  14   1    2.94    0.46
   3  14  -1    2.97    0.38
   2 -14  -1   66.90    1.49
  -2 -14   1   71.56    2.13
   2 -14  -1   67.80    1.64
  -2  14   1   69.50    1.50
   2  14  -1   68.88    1.52
  -1 -14   1   11.79    0.97
   1 -14  -1   12.48    0.57
   1 -14  -1   12.42    0.75
  -1 -14   1   13.71    0.36
  -1  14   1   13.16    0.66
   1  14  -1   12.52    0.61
   0 -14   1   21.76    1.14
   0 -14  -1   18.61    1.00
   0 -14  -1   20.80    0.66
   0 -14   1   19.01    0.58
   0  14   1   20.68    0.76
   0  14  -1   20.31    0.73
   1 -14   1    3.21    0.37
  -1 -14  -1    2.90    0.52
   1 -14   1    3.29    0.59
  -1 -14  -1    3.42    0.36
  -1  14  -1    3.38    0.37
   1  14   1    2.91    0.36
   2 -14   1   59.09    1.42
   2 -14   1   57.18    1.66
  -2 -14  -1   58.67    1.11
  -2 -14  -1   59.56    1.96
  -2  14  -1   57.94    1.31
   2  14   1   59.33    1.38
   3 -14   1   66.10    1.86
   3 -14   1   66.76    1.67
  -3 -14  -1   69.10    1.30
   3  14   1   66.81    1.51
   3  14   1   67.95    2.16
  -3  14  -1   65.32    1.47
   4 -14   1   23.45    1.09
  -4 -14  -1   24.00    0.78
   4 -14   1   23.09    1.08
  -4  14  -1   22.82    0.94
   4  14   1   23.83    1.44
   4  14   1   24.16    0.91
   5 -14   1    1.76    0.51
  -5 -14  -1    1.89    0.43
   5 -14   1    1.59    0.47
  -5  14  -1    1.65    0.42
   5  14   1    1.07    0.38
   5  14   1    1.36    0.74
   6 -14   1   -0.41    0.49
   6 -14   1   -0.30    0.37
  -6 -14  -1    0.60    0.60
  -6  14  -1    0.38    0.39
   6  14   1   -0.20    0.32
   7 -14   1    2.39    0.74
  -7 -14  -1    2.90    0.87
   7  14   1    1.77    0.49
  -8 -14  -1    4.40    1.13
   8 -14   1    1.96    0.70
  -9 -15   1    3.27    0.96
   9 -15  -1    1.51    0.69
   9  15  -1    2.15    0.65
   8 -15  -1    6.63    0.93
  -8 -15   1   10.74    1.26
   8  15  -1    7.37    0.85
  -7 -15   1    1.11    0.77
   7 -15  -1    0.16    0.52
   7  15  -1    1.28    0.47
  -6 -15   1    2.06    0.84
   6 -15  -1    1.51    0.54
   6  15  -1    0.92    0.41
   5 -15  -1    4.89    0.70
  -5 -15   1    3.92    0.91
   5 -15  -1    3.21    0.43
   5  15  -1    4.21    0.56
   4 -15  -1    0.35    0.26
   4 -15  -1    0.04    0.39
  -4 -15   1   -0.25    0.57
   4  15  -1    0.24    0.34
   3 -15  -1   24.03    0.85
   3 -15  -1   25.94    0.98
  -3 -15   1   22.72    1.30
  -3  15   1   25.52    0.98
   3  15  -1   23.16    0.87
   2 -15  -1   10.15    0.68
  -2 -15   1    9.50    0.94
   2 -15  -1   10.89    0.65
  -2  15   1   10.21    0.63
   2  15  -1   10.10    0.58
  -1 -15   1    1.37    0.16
   1 -15  -1    1.30    0.32
   1 -15  -1    0.87    0.46
  -1 -15   1    0.94    0.56
  -1  15   1    1.47    0.33
   1  15  -1    1.27    0.32
   0 -15   1   12.49    0.48
   0 -15   1   12.83    1.03
   0 -15  -1   11.90    0.77
   0 -15  -1   12.89    0.54
   0  15   1   12.96    0.61
   0  15  -1   12.76    0.62
  -1 -15  -1    2.24    0.58
   1 -15   1    2.83    0.59
  -1 -15  -1    2.71    0.30
   1 -15   1    2.44    0.35
   1  15   1    2.52    0.37
  -1  15  -1    1.95    0.33
   2 -15   1    8.44    0.73
   2 -15   1    7.32    0.58
  -2 -15  -1    7.83    0.42
  -2 -15  -1    8.85    0.86
  -2  15  -1    8.81    0.57
   2  15   1    8.34    0.57
  -3 -15  -1    1.23    0.56
   3 -15   1    1.59    0.41
  -3 -15  -1    2.40    0.29
   3 -15   1    2.38    0.50
   3  15   1    1.64    0.36
  -3  15  -1    1.81    0.38
   4 -15   1    8.02    0.72
   4 -15   1    8.41    0.83
  -4 -15  -1    7.60    1.02
  -4 -15  -1    8.47    0.52
  -4  15  -1    9.18    0.71
   4  15   1    8.04    0.63
   5 -15   1    1.38    0.50
   5 -15   1    1.11    0.42
  -5 -15  -1    1.33    0.74
  -5  15  -1    1.38    0.41
   5  15   1    1.68    0.42
  -6 -15  -1    1.44    0.75
   6 -15   1    1.04    0.58
   6 -15   1    1.17    0.46
   6  15   1    0.50    0.37
  -6  15  -1    0.01    0.37
  -7 -15  -1    1.09    0.83
   7 -15   1    0.45    0.60
   7  15   1    0.40    0.42
   8 -15   1    1.21    0.74
  -8 -15  -1    3.63    1.07
  -9  15  -1    0.31    0.67
  -9 -16   1    1.37    0.72
   9 -16  -1    0.45    0.66
   9  16  -1   -0.10    0.49
   8 -16  -1    4.08    0.83
  -8 -16   1    5.70    1.08
   8  16  -1    3.74    0.67
   7 -16  -1    0.67    0.56
  -7 -16   1    1.74    0.86
   7  16  -1    0.67    0.44
  -6 -16   1    0.10    0.71
   6 -16  -1    0.43    0.48
   6  16  -1    0.53    0.40
   5 -16  -1   -0.08    0.42
  -5 -16   1    0.29    0.65
   5  16  -1    0.23    0.38
  -4 -16   1    5.80    0.93
   4 -16  -1    7.19    0.53
   4 -16  -1    8.82    0.83
  -4  16   1    8.32    0.80
   4  16  -1    7.55    0.67
   3 -16  -1    4.20    0.47
  -3 -16   1    3.49    0.77
   3 -16  -1    4.14    0.52
   3  16  -1    4.56    0.51
  -3  16   1    4.15    0.52
   2 -16  -1   33.89    1.05
  -2 -16   1   33.79    1.49
   2 -16  -1   32.80    1.14
   2  16  -1   32.63    1.02
  -2  16   1   34.32    1.09
   1 -16  -1    2.09    0.50
  -1 -16   1    2.34    0.22
  -1 -16   1    2.49    0.64
   1 -16  -1    2.57    0.38
   1  16  -1    2.05    0.36
  -1  16   1    2.07    0.36
   0 -16  -1   10.32    0.76
   0 -16   1   11.69    1.05
   0 -16   1   11.08    0.46
   0 -16  -1   10.07    0.50
   0  16   1   10.52    0.62
   0  16  -1   10.89    0.59
   1 -16   1    0.01    0.43
  -1 -16  -1    0.30    0.22
  -1 -16  -1    0.15    0.44
   1 -16   1    0.30    0.26
  -1  16  -1    0.47    0.25
   1  16   1   -0.23    0.26
  -2 -16  -1   18.97    1.13
   2 -16   1   18.39    0.99
  -2 -16  -1   19.46    0.57
   2 -16   1   18.33    0.80
  -2  16  -1   19.01    0.76
   2  16   1   19.22    0.79
   3 -16   1    0.78    0.38
  -3 -16  -1    0.08    0.51
  -3 -16  -1    0.80    0.25
   3 -16   1    0.66    0.39
   3  16   1    0.64    0.29
  -3  16  -1    0.35    0.34
   4 -16   1    5.32    0.71
   4 -16   1    5.71    0.68
  -4 -16  -1    5.82    0.53
  -4 -16  -1    5.47    0.94
   4  16   1    5.53    0.55
  -4  16  -1    7.01    0.69
   5 -16   1    0.33    0.49
   5 -16   1    0.45    0.40
  -5 -16  -1    0.41    0.59
   5  16   1    0.61    0.34
  -5  16  -1   -0.22    0.36
  -6 -16  -1    2.32    0.80
   6 -16   1    0.75    0.56
  -6  16  -1    0.52    0.43
   6  16   1    1.06    0.42
  -7 -16  -1    1.97    0.92
   7 -16   1    0.43    0.58
   7  16   1    0.69    0.43
  -8 -16  -1    1.57    0.89
   8 -16   1    1.18    0.70
  -9  16  -1    0.46    0.66
  -9 -17   1    2.47    0.90
   9 -17  -1    0.82    0.72
   9  17  -1    0.21    0.52
   8 -17  -1    1.85    0.70
  -8 -17   1    4.31    1.07
   8  17  -1    2.38    0.61
  -8  17   1    2.75    0.65
  -7 -17   1    1.15    0.81
   7 -17  -1    0.18    0.54
   7  17  -1    0.20    0.42
   6 -17  -1    3.42    0.72
  -6 -17   1    3.64    0.90
   6  17  -1    4.13    0.59
   5 -17  -1    1.76    0.59
  -5 -17   1    0.73    0.70
   5  17  -1    0.56    0.37
  -5  17   1    0.46    0.45
   4 -17  -1   19.25    0.80
   4 -17  -1   20.72    1.01
  -4 -17   1   18.70    1.36
  -4  17   1   20.23    1.01
   4  17  -1   18.48    0.91
   3 -17  -1   25.53    0.94
  -3 -17   1   26.69    1.56
   3 -17  -1   26.73    1.06
   3  17  -1   25.38    0.96
  -3  17   1   25.78    1.04
   2 -17  -1    0.08    0.38
  -2 -17   1    0.16    0.56
   2 -17  -1    0.14    0.33
   2  17  -1   -0.20    0.24
  -2  17   1    0.08    0.30
   1 -17  -1   28.76    1.14
  -1 -17   1   28.99    1.38
  -1 -17   1   29.73    0.62
   1 -17  -1   29.43    0.91
   1  17  -1   29.43    0.96
  -1  17   1   28.58    0.97
   0 -17   1   51.48    1.75
   0 -17  -1   52.35    1.12
   0 -17   1   49.57    1.06
   0 -17  -1   48.92    1.60
   0  17   1   52.15    1.31
   0  17  -1   51.38    1.27
   1 -17   1    2.03    0.33
   1 -17   1    2.66    0.61
  -1 -17  -1    2.30    0.61
  -1 -17  -1    2.72    0.30
   1  17   1    1.86    0.34
  -1  17  -1    2.13    0.34
   2 -17   1    1.21    0.46
  -2 -17  -1    0.87    0.52
   2 -17   1    0.97    0.31
  -2 -17  -1    1.25    0.26
  -2  17  -1    0.57    0.31
   2  17   1    0.68    0.31
  -3 -17  -1    0.90    0.27
   3 -17   1    1.34    0.45
   3 -17   1    1.13    0.45
  -3 -17  -1    0.87    0.59
  -3  17  -1    1.06    0.39
   3  17   1    1.38    0.37
   4 -17   1    6.03    0.73
  -4 -17  -1    5.36    0.88
   4 -17   1    6.00    0.72
  -4  17  -1    5.54    0.58
   4  17   1    5.20    0.55
   5 -17   1    0.27    0.37
   5 -17   1    0.42    0.50
  -5 -17  -1   -0.04    0.58
   5  17   1    0.29    0.34
  -5  17  -1   -0.65    0.34
  -6 -17  -1    3.14    0.85
   6 -17   1    2.06    0.61
   6  17   1    1.82    0.47
  -6  17  -1    2.29    0.50
  -7 -17  -1    1.16    0.87
   7 -17   1   -0.75    0.47
   7  17   1    0.89    0.44
   8 -17   1    1.42    0.70
  -8 -17  -1    3.15    0.92
  -9 -17  -1    4.94    0.96
  -9 -18   1    5.08    1.06
   9 -18  -1    2.79    0.86
   9  18  -1    1.54    0.57
   8 -18  -1    1.49    0.68
  -8 -18   1    2.88    0.91
   8  18  -1    2.67    0.62
  -8  18   1    2.60    0.66
   7 -18  -1    1.78    0.70
  -7 -18   1    1.83    0.81
  -7  18   1    0.91    0.55
   7  18  -1    0.84    0.50
  -6 -18   1    1.29    0.76
   6 -18  -1    0.97    0.59
   6  18  -1    0.78    0.42
  -6  18   1    0.81    0.52
  -5 -18   1    1.46    0.76
   5 -18  -1    1.63    0.53
   5  18  -1    2.05    0.45
  -5  18   1    2.24    0.53
  -4 -18   1    0.69    0.77
   4 -18  -1    0.01    0.28
   4 -18  -1    0.48    0.42
   4  18  -1   -0.03    0.34
  -4  18   1    0.28    0.44
  -3 -18   1   15.28    1.26
   3 -18  -1   16.51    0.90
   3 -18  -1   15.38    0.77
  -3  18   1   15.29    0.88
   3  18  -1   14.71    0.80
   2 -18  -1    1.73    0.47
  -2 -18   1    2.09    0.68
   2 -18  -1    1.85    0.40
  -2  18   1    2.41    0.46
   2  18  -1    1.23    0.35
  -1 -18   1   61.87    2.03
   1 -18  -1   64.27    1.41
  -1 -18   1   63.77    1.09
   1 -18  -1   60.89    1.80
  -1  18   1   63.82    1.54
   1  18  -1   61.05    1.49
   0 -18  -1   55.95    1.20
   0 -18   1   54.34    1.14
   0 -18   1   55.92    1.93
   0 -18  -1   54.54    1.75
   0  18  -1   54.58    1.36
   0  18   1   54.61    1.38
   1 -18   1   -0.26    0.24
  -1 -18  -1   -0.11    0.21
   1 -18   1    0.26    0.54
  -1 -18  -1   -0.09    0.45
   1  18   1    0.12    0.29
  -1  18  -1    0.29    0.28
  -2 -18  -1   11.40    1.05
   2 -18   1   11.22    0.87
  -2 -18  -1   10.95    0.46
   2 -18   1   12.57    0.71
  -2  18  -1   10.98    0.69
   2  18   1   10.37    0.64
  -3 -18  -1    4.62    0.82
   3 -18   1    6.45    0.77
  -3 -18  -1    5.69    0.46
   3 -18   1    5.99    0.66
   3  18   1    6.50    0.60
  -3  18  -1    6.14    0.63
   4 -18   1    5.12    0.68
  -4 -18  -1    4.94    0.89
   4 -18   1    4.71    0.65
   4  18   1    5.73    0.59
  -4  18  -1    5.50    0.60
  -5 -18  -1    0.60    0.71
   5 -18   1    0.04    0.39
   5 -18   1    0.08    0.43
   5  18   1   -0.02    0.34
  -5  18  -1   -0.27    0.36
   6 -18   1    4.44    0.80
  -6 -18  -1    4.15    1.01
  -6  18  -1    3.15    0.56
   6  18   1    3.85    0.58
   7 -18   1    0.59    0.58
  -7 -18  -1    0.40    0.70
   7  18   1   -0.38    0.43
   8 -18   1    3.43    0.87
  -8 -18  -1    4.61    1.01
   9 -19  -1    2.43    0.84
  -9 -19   1    3.85    1.04
   9  19  -1    1.92    0.63
   8 -19  -1   -0.04    0.63
  -8 -19   1    1.74    0.86
   8  19  -1    1.34    0.53
  -8  19   1   -0.58    0.68
  -7 -19   1    0.43    0.72
   7 -19  -1    0.54    0.63
   7  19  -1    0.32    0.44
  -7  19   1   -0.32    0.49
  -6 -19   1    1.32    0.76
   6 -19  -1    1.20    0.56
   6  19  -1    0.78    0.44
  -6  19   1    1.44    0.55
   5 -19  -1    8.41    0.90
  -5 -19   1    8.97    1.21
  -5  19   1   10.37    0.89
   5  19  -1    9.31    0.78
  -4 -19   1   -0.59    0.65
   4 -19  -1    0.41    0.48
   4 -19  -1   -0.30    0.28
   4  19  -1   -0.47    0.29
  -4  19   1    0.12    0.38
  -3 -19   1    2.48    0.79
   3 -19  -1    3.63    0.59
   3 -19  -1    3.06    0.48
  -3  19   1    2.81    0.51
   3  19  -1    2.79    0.46
  -2 -19   1    7.91    0.99
   2 -19  -1    9.45    0.66
   2 -19  -1    9.14    0.79
  -2  19   1   10.24    0.76
   2  19  -1    8.71    0.66
  -1 -19   1   24.19    1.33
  -1 -19   1   23.26    0.56
   1 -19  -1   23.04    1.14
   1 -19  -1   23.95    0.85
   1  19  -1   22.92    0.91
  -1  19   1   23.80    0.95
   0 -19   1   11.01    0.48
   0 -19  -1   10.88    0.55
   0 -19  -1   10.56    0.93
   0 -19   1   11.23    1.12
   0  19  -1   12.02    0.68
   0  19   1   10.94    0.69
   1 -19   1    1.69    0.65
  -1 -19  -1    1.53    0.27
  -1 -19  -1    0.45    0.53
   1 -19   1    1.69    0.33
  -1  19  -1    1.78    0.38
   1  19   1    1.55    0.39
   2 -19   1    5.18    0.70
  -2 -19  -1    5.16    0.37
  -2 -19  -1    5.14    0.87
   2 -19   1    4.86    0.52
  -2  19  -1    4.18    0.48
   2  19   1    5.27    0.55
  -3 -19  -1    0.39    0.60
   3 -19   1    0.65    0.41
   3 -19   1    1.17    0.48
   3  19   1    0.07    0.31
  -3  19  -1    0.80    0.38
   4 -19   1    0.70    0.48
   4 -19   1    0.16    0.37
  -4 -19  -1    0.15    0.64
   4  19   1    0.02    0.32
  -4  19  -1    0.37    0.37
   5 -19   1    3.62    0.67
   5 -19   1    3.49    0.63
  -5 -19  -1    2.78    0.82
   5  19   1    2.24    0.45
  -5  19  -1    3.13    0.55
   6 -19   1    3.27    0.77
  -6 -19  -1    3.81    0.95
   6  19   1    3.36    0.56
  -6  19  -1    1.70    0.51
   7 -19   1   -0.42    0.52
  -7 -19  -1    2.30    0.88
   7  19   1    0.50    0.46
   8 -19   1    0.59    0.63
  -8 -19  -1    2.13    0.82
  -9 -20   1    3.00    1.05
   9 -20  -1    1.35    0.72
   9  20  -1    1.65    0.63
  -8 -20   1    2.58    1.01
   8 -20  -1    1.06    0.71
   8  20  -1    0.40    0.48
   7 -20  -1   -0.14    0.54
  -7 -20   1    0.55    0.78
   7  20  -1    1.03    0.48
  -7  20   1   -0.54    0.49
  -6 -20   1    9.53    1.28
   6 -20  -1    8.73    1.02
  -6  20   1    9.37    0.88
   6  20  -1    8.86    0.83
   5 -20  -1    8.90    0.86
  -5 -20   1    8.61    1.18
  -5  20   1    9.95    0.91
   5  20  -1    9.89    0.75
   4 -20  -1    0.31    0.49
  -4 -20   1    1.47    0.83
   4  20  -1    0.80    0.40
  -4  20   1    0.37    0.45
   3 -20  -1    0.92    0.44
   3 -20  -1    1.04    0.42
  -3 -20   1    0.18    0.71
   3  20  -1    1.08    0.36
  -3  20   1    1.41    0.47
   2 -20  -1    2.59    0.47
   2 -20  -1    2.81    0.58
  -2 -20   1    2.52    0.83
  -2  20   1    3.06    0.51
   2  20  -1    3.29    0.48
  -1 -20   1   21.73    1.35
   1 -20  -1   20.80    0.79
   1 -20  -1   20.18    1.11
  -1 -20   1   20.75    0.54
   1  20  -1   20.74    0.90
  -1  20   1   20.39    0.90
   0 -20  -1    1.16    0.60
   0 -20   1    1.44    0.68
   0 -20   1    1.93    0.28
   0 -20  -1    1.83    0.33
   0  20   1    1.72    0.37
   0  20  -1    1.50    0.36
  -1 -20  -1   43.11    0.97
  -1 -20  -1   43.18    1.73
   1 -20   1   44.05    1.15
   1 -20   1   42.86    1.68
  -1  20  -1   44.06    1.27
   1  20   1   43.68    1.28
   2 -20   1    3.67    0.50
  -2 -20  -1    3.52    0.34
  -2 -20  -1    3.11    0.78
   2 -20   1    3.53    0.65
   2  20   1    3.32    0.49
  -2  20  -1    4.68    0.55
   3 -20   1   10.72    0.82
  -3 -20  -1    9.74    1.16
   3 -20   1    9.62    0.82
  -3  20  -1   10.63    0.76
   3  20   1    9.90    0.73
  -4 -20  -1    1.50    0.71
   4 -20   1    1.10    0.51
   4 -20   1    0.74    0.45
  -4  20  -1    1.43    0.45
   4  20   1    0.98    0.39
   5 -20   1    2.40    0.65
  -5 -20  -1    1.44    0.82
   5 -20   1    1.61    0.53
   5  20   1    2.46    0.50
  -5  20  -1    1.39    0.46
   6 -20   1    2.27    0.71
  -6 -20  -1    1.31    0.79
  -6  20  -1    0.34    0.78
   6  20   1    1.07    0.44
   7 -20   1    0.04    0.58
  -7 -20  -1    1.61    0.82
   7  20   1   -0.13    0.41
  -8 -20  -1    2.80    0.90
   8 -20   1    0.98    0.70
   9 -21  -1    0.08    0.69
  -9 -21   1    2.95    0.95
   9  21  -1   -0.02    0.55
  -8 -21   1    2.81    1.08
   8 -21  -1    0.99    0.75
   8  21  -1    1.38    0.54
   7 -21  -1    7.01    1.05
  -7 -21   1    4.94    1.12
  -7  21   1    3.36    0.70
   7  21  -1    5.49    0.75
  -6 -21   1    7.58    1.19
   6 -21  -1    6.86    0.89
  -6  21   1    3.95    0.67
   6  21  -1    5.65    0.72
   5 -21  -1    0.08    0.45
  -5 -21   1    0.27    0.82
  -5  21   1    0.26    0.45
   5  21  -1   -0.01    0.37
   4 -21  -1    0.83    0.51
  -4 -21   1    0.18    0.73
   4  21  -1    0.37    0.36
  -4  21   1    0.49    0.45
   3 -21  -1    2.97    0.51
   3 -21  -1    3.01    0.55
  -3 -21   1    2.91    0.88
   3  21  -1    2.75    0.46
  -3  21   1    2.59    0.53
   2 -21  -1   23.32    1.14
  -2 -21   1   21.59    1.47
   2 -21  -1   24.47    0.97
   2  21  -1   22.37    0.96
  -2  21   1   23.60    1.05
  -1 -21   1   34.02    1.64
   1 -21  -1   32.14    1.40
  -1 -21   1   33.47    0.73
   1 -21  -1   35.33    1.06
  -1  21   1   33.56    1.19
   1  21  -1   33.03    1.12
   0 -21   1   16.48    0.62
   0 -21  -1   17.32    0.67
   0 -21  -1   15.34    1.15
   0 -21   1   16.26    1.21
   0  21  -1   17.58    0.85
   0  21   1   19.41    0.93
   1 -21   1    1.33    0.68
  -1 -21  -1    2.40    0.31
   1 -21   1    2.02    0.37
  -1 -21  -1    1.57    0.70
  -1  21  -1    1.93    0.42
   1  21   1    1.58    0.41
   2 -21   1    0.30    0.34
  -2 -21  -1   -0.42    0.64
   2 -21   1    0.48    0.53
   2  21   1    0.01    0.33
  -2  21  -1   -0.12    0.35
   3 -21   1    0.61    0.48
  -3 -21  -1   -0.03    0.62
   3 -21   1    0.67    0.43
   3  21   1    0.91    0.40
  -3  21  -1    0.57    0.40
   4 -21   1    2.75    0.57
  -4 -21  -1    4.35    0.98
   4 -21   1    2.92    0.61
   4  21   1    3.14    0.51
  -4  21  -1    2.88    0.54
   5 -21   1    6.83    0.89
  -5 -21  -1    6.51    1.04
  -5  21  -1    5.47    0.66
   5  21   1    7.19    0.72
  -6 -21  -1    0.61    0.81
   6 -21   1   -0.39    0.48
   6  21   1   -0.18    0.36
  -7 -21  -1    8.65    1.32
   7 -21   1    8.79    1.11
   7  21   1    6.33    0.75
  -8 -21  -1    3.53    0.92
   8 -21   1    0.06    0.68
   9 -22  -1    1.42    1.13
  -9 -22   1    1.99    0.97
   9  22  -1    0.68    0.53
  -8 -22   1    2.06    0.96
   8 -22  -1    1.25    0.75
   8  22  -1    2.75    0.67
   7 -22  -1    9.67    1.13
  -7 -22   1   11.21    1.49
   7  22  -1   11.90    0.99
  -7  22   1    8.49    0.91
  -6 -22   1    0.17    0.77
   6 -22  -1    0.36    0.52
  -6  22   1    0.18    0.50
   6  22  -1   -0.09    0.39
  -5 -22   1    1.16    0.90
   5 -22  -1    0.30    0.52
  -5  22   1   -0.14    0.44
   5  22  -1    0.08    0.39
  -4 -22   1    1.05    0.83
   4 -22  -1    0.96    0.52
   4  22  -1    1.44    0.44
  -4  22   1    1.91    0.53
   3 -22  -1    1.11    0.47
  -3 -22   1    0.47    0.83
   3 -22  -1    0.32    0.42
  -3  22   1    0.36    0.46
   3  22  -1    0.60    0.37
  -2 -22   1    0.16    0.84
   2 -22  -1    0.43    0.38
   2 -22  -1    0.03    0.49
   2  22  -1    0.16    0.31
  -2  22   1    0.94    0.39
   1 -22  -1   20.10    1.20
  -1 -22   1   20.93    0.55
  -1 -22   1   20.99    1.53
   1 -22  -1   20.19    0.84
  -1  22   1   21.68    1.01
   1  22  -1   20.57    0.95
   0 -22  -1    0.04    0.61
   0 -22   1    0.28    0.22
   0 -22   1   -0.16    0.62
   0 -22  -1    0.04    0.25
   0  22  -1   -0.04    0.34
   0  22   1    0.46    0.33
  -1 -22  -1    5.20    0.88
  -1 -22  -1    5.21    0.43
   1 -22   1    6.51    0.91
   1 -22   1    5.81    0.52
   1  22   1    5.70    0.62
  -1  22  -1    4.69    0.54
   2 -22   1    1.78    0.65
  -2 -22  -1    1.30    0.72
   2 -22   1    2.41    0.45
   2  22   1    2.07    0.42
  -2  22  -1    1.74    0.45
  -3 -22  -1    2.72    0.81
   3 -22   1    2.32    0.57
   3 -22   1    3.49    0.57
  -3  22  -1    3.16    0.53
   3  22   1    2.47    0.51
  -4 -22  -1    6.12    1.01
   4 -22   1    5.21    0.74
   4 -22   1    5.39    0.73
   4  22   1    6.84    0.70
  -4  22  -1    5.95    0.66
  -5 -22  -1    2.95    0.94
   5 -22   1    3.01    0.69
   5  22   1    3.52    0.56
  -5  22  -1    1.51    0.51
  -6 -22  -1    1.23    0.81
   6 -22   1    1.50    0.66
   6  22   1    1.44    0.49
   7 -22   1   -0.07    0.61
  -7 -22  -1    1.81    0.87
   7  22   1    0.54    0.45
   8 -22   1    5.03    1.03
  -8 -22  -1    6.13    1.13
   9  23  -1    0.38    0.52
   8 -23  -1   -0.02    0.69
  -8 -23   1    1.58    0.95
   8  23  -1    0.25    0.49
   7 -23  -1    0.37    0.66
  -7 -23   1    0.98    1.01
  -7  23   1    0.09    0.54
   7  23  -1    0.22    0.46
  -6 -23   1    0.78    0.87
   6 -23  -1    0.31    0.58
   6  23  -1    0.11    0.42
  -6  23   1   -0.81    0.47
   5 -23  -1   15.46    1.11
  -5 -23   1   15.18    1.63
  -5  23   1   14.00    1.06
   5  23  -1   15.44    1.01
  -4 -23   1   23.02    1.66
   4 -23  -1   24.99    1.24
  -4  23   1   25.49    1.22
   4  23  -1   23.75    1.13
   3 -23  -1    1.92    0.47
   3 -23  -1    1.41    0.47
  -3 -23   1    1.65    0.92
  -3  23   1    1.35    0.49
   3  23  -1    1.56    0.42
   2 -23  -1   14.30    0.83
   2 -23  -1   13.73    1.03
  -2 -23   1   13.82    1.48
  -2  23   1   15.25    0.95
   2  23  -1   14.00    0.82
   1 -23  -1    0.63    0.32
   1 -23  -1    0.55    0.62
  -1 -23   1   -0.05    0.72
  -1  23   1    0.44    0.40
   1  23  -1    0.11    0.30
   0 -23  -1    5.03    0.77
   0 -23   1    5.81    0.91
   0 -23  -1    5.31    0.49
   0 -23   1    4.87    0.42
   0  23   1    5.46    0.62
   0  23  -1    5.36    0.60
   1 -23   1    1.00    0.70
  -1 -23  -1    1.13    0.27
   1 -23   1    1.03    0.33
  -1 -23  -1    0.61    0.64
   1  23   1    0.96    0.41
  -1  23  -1    0.64    0.41
   2 -23   1   -0.25    0.32
   2 -23   1    0.58    0.58
  -2 -23  -1   -0.79    0.61
  -2  23  -1    0.44    0.39
   2  23   1    0.29    0.35
   3 -23   1    1.20    0.44
  -3 -23  -1    1.59    0.82
   3 -23   1    0.43    0.47
   3  23   1    0.94    0.37
  -3  23  -1    1.06    0.45
   4 -23   1    0.62    0.47
  -4 -23  -1    0.97    0.79
   4 -23   1    1.20    0.55
   4  23   1    0.77    0.40
  -4  23  -1    1.06    0.47
   5 -23   1    1.88    0.65
  -5 -23  -1    1.57    0.83
  -5  23  -1    1.51    0.52
   5  23   1    1.89    0.48
   6 -23   1   13.23    1.24
  -6 -23  -1   14.32    1.54
   6  23   1   11.94    0.94
  -7 -23  -1    1.91    0.95
   7 -23   1   -0.25    0.57
   7  23   1    1.03    0.47
   8 -23   1    0.44    0.61
  -8 -24   1    1.25    1.05
   8 -24  -1    0.35    0.66
   8  24  -1    1.01    0.55
   7 -24  -1    2.15    0.76
  -7 -24   1    3.72    1.21
   7  24  -1    1.62    0.58
  -7  24   1    0.28    0.59
  -6 -24   1    8.55    1.32
   6 -24  -1    8.96    1.05
   6  24  -1    8.61    0.86
  -6  24   1    7.56    0.87
   5 -24  -1    3.17    0.71
  -5 -24   1    2.71    1.04
  -5  24   1    2.86    0.62
   5  24  -1    1.23    0.44
  -4 -24   1   10.86    1.46
   4 -24  -1   10.26    0.84
  -4  24   1   10.03    0.96
   4  24  -1    9.22    0.83
  -3 -24   1    0.73    0.90
   3 -24  -1    0.01    0.44
   3 -24  -1   -0.06    0.42
   3  24  -1    0.01    0.32
  -3  24   1    0.13    0.42
   2 -24  -1    5.98    0.65
   2 -24  -1    6.64    0.81
  -2 -24   1    6.79    1.17
  -2  24   1    5.19    0.61
   2  24  -1    7.51    0.73
   1 -24  -1   12.10    0.71
  -1 -24   1   11.59    1.39
   1 -24  -1   12.89    1.19
   1  24  -1   13.02    0.83
  -1  24   1   13.12    0.89
   0 -24   1   12.96    0.58
   0 -24  -1   14.25    1.21
   0 -24   1   13.65    1.23
   0 -24  -1   13.67    0.64
   0  24   1   13.13    0.82
   0  24  -1   13.99    0.86
   1 -24   1    1.40    0.68
   1 -24   1    1.81    0.38
  -1 -24  -1    2.38    0.74
   1  24   1    1.82    0.48
  -1  24  -1    1.71    0.48
   2 -24   1    0.33    0.58
  -2 -24  -1    0.31    0.66
   2 -24   1    0.33    0.36
   2  24   1    0.01    0.36
  -2  24  -1    0.57    0.41
  -3 -24  -1    1.01    0.73
   3 -24   1    1.02    0.44
   3 -24   1    0.11    0.47
  -3  24  -1    0.58    0.45
   3  24   1    0.41    0.35
   4 -24   1    0.32    0.45
   4 -24   1    0.17    0.46
  -4 -24  -1    0.09    0.69
   4  24   1    0.89    0.42
  -4  24  -1    0.10    0.42
   5 -24   1    0.96    0.60
  -5 -24  -1    2.12    0.95
  -5  24  -1    0.69    0.50
   5  24   1    0.89    0.44
  -6 -24  -1    3.00    0.98
   6 -24   1    5.66    0.92
   6  24   1    4.03    0.64
   7 -24   1    2.05    0.80
  -7 -24  -1    2.76    1.06
   7  24   1    1.25    0.50
  -8 -24  -1    1.62    0.84
   8 -24   1    0.69    0.68
  -8 -25   1    3.63    1.22
   8 -25  -1    1.90    0.83
   8  25  -1    1.76    0.64
   7 -25  -1    2.17    0.81
  -7 -25   1    3.07    1.22
   7  25  -1    3.13    0.68
  -7  25   1    0.94    0.64
   6 -25  -1    2.96    0.77
  -6 -25   1    2.87    1.09
  -6  25   1    2.55    0.68
   6  25  -1    3.07    0.63
   5 -25  -1    9.01    1.00
  -5 -25   1    8.28    1.29
  -5  25   1    6.46    0.83
   5  25  -1    7.65    0.82
   4 -25  -1    1.04    0.54
  -4 -25   1    0.28    0.92
   4  25  -1    0.77    0.44
  -4  25   1    0.53    0.51
  -3 -25   1    1.65    0.99
   3 -25  -1    0.95    0.47
   3 -25  -1    1.40    0.62
  -3  25   1    1.64    0.51
   3  25  -1    1.05    0.43
  -2 -25   1    2.89    0.93
   2 -25  -1    1.83    0.64
   2 -25  -1    2.34    0.50
  -2  25   1    2.07    0.54
   2  25  -1    1.85    0.48
   1 -25  -1    0.58    0.34
   1 -25  -1    0.34    0.66
  -1 -25   1    0.97    0.77
  -1  25   1    0.61    0.42
   1  25  -1    0.74    0.42
   0 -25  -1    0.72    0.30
   0 -25   1    0.74    0.25
   0 -25  -1    0.76    0.71
   0 -25   1    0.91    0.78
   0  25   1    0.68    0.42
   0  25  -1    0.99    0.42
   1 -25   1    4.92    0.52
  -1 -25  -1    4.74    0.96
   1 -25   1    6.22    0.95
   1  25   1    6.35    0.70
  -1  25  -1    4.79    0.59
   2 -25   1   -0.60    0.52
   2 -25   1    0.10    0.35
  -2 -25  -1    0.11    0.74
   2  25   1   -0.14    0.31
  -2  25  -1    0.34    0.41
  -3 -25  -1    2.89    0.87
   3 -25   1    3.43    0.58
   3 -25   1    3.59    0.69
   3  25   1    3.20    0.52
  -3  25  -1    2.94    0.57
   4 -25   1    1.55    0.51
  -4 -25  -1    1.33    0.79
   4  25   1    0.95    0.44
  -4  25  -1    0.39    0.49
   5 -25   1   -0.21    0.47
  -5 -25  -1    0.90    0.78
   5  25   1    0.59    0.43
  -5  25  -1    0.39    0.48
  -6 -25  -1    4.00    1.17
   6 -25   1    2.36    0.79
   6  25   1    2.69    0.59
   7 -25   1    0.94    0.65
  -7 -25  -1    2.52    1.06
   7  25   1    1.41    0.53
  -8 -25  -1    3.58    1.17
   8 -25   1    1.70    1.18
   8 -26  -1    1.78    0.84
  -8 -26   1    3.48    1.24
   8  26  -1    2.18    0.66
   7 -26  -1    1.39    0.79
  -7 -26   1    2.78    1.24
  -7  26   1    0.82    0.62
   7  26  -1    1.49    0.59
  -6 -26   1    4.28    1.18
   6 -26  -1    5.41    0.88
   6  26  -1    5.72    0.82
  -6  26   1    4.78    0.79
  -5 -26   1    5.21    1.17
   5 -26  -1    4.17    0.79
  -5  26   1    4.60    0.76
   5  26  -1    3.84    0.67
  -4 -26   1    4.11    1.15
   4 -26  -1    5.41    0.76
   4  26  -1    3.92    0.62
  -4  26   1    4.71    0.70
   3 -26  -1    1.68    0.51
  -3 -26   1    1.33    1.01
  -3  26   1    2.03    0.57
   3  26  -1    2.24    0.51
   2 -26  -1    0.66    0.38
   2 -26  -1   -0.18    0.58
  -2 -26   1   -0.01    0.76
  -2  26   1    0.55    0.46
   2  26  -1    0.33    0.39
   1 -26  -1   -0.14    0.31
  -1 -26   1    0.93    0.91
   1 -26  -1    1.28    0.69
   1  26  -1    0.69    0.39
  -1  26   1    0.80    0.45
   0 -26  -1   15.53    1.29
   0 -26  -1   16.34    0.70
   0 -26   1   15.15    0.70
   0 -26   1   15.48    1.44
   0  26   1   16.10    0.94
   0  26  -1   18.34    0.95
  -1 -26  -1   -0.44    0.60
   1 -26   1    0.01    0.68
   1 -26   1    0.33    0.30
  -1  26  -1   -0.05    0.37
   1  26   1    0.04    0.39
   2 -26   1    0.12    0.33
  -2 -26  -1    0.47    0.69
   2 -26   1    0.14    0.58
  -2  26  -1    0.02    0.40
   2  26   1    0.50    0.41
   3 -26   1    6.47    0.73
   3 -26   1    6.07    0.81
  -3 -26  -1    7.29    1.19
   3  26   1    4.99    0.62
  -3  26  -1    6.64    0.73
  -4 -26  -1    0.34    0.74
   4 -26   1    0.08    0.40
   4  26   1    0.14    0.40
  -4  26  -1    0.00    0.45
   5 -26   1    0.89    0.57
  -5 -26  -1    0.87    0.83
   5  26   1    0.24    0.40
  -5  26  -1    0.13    0.52
   6 -26   1    3.98    0.87
  -6 -26  -1    3.45    1.07
   6  26   1    3.21    0.65
  -7 -26  -1    1.57    0.97
   7 -26   1   -0.11    0.64
   7  26   1    0.68    0.50
  -8 -27   1    9.63    1.53
   8 -27  -1    9.13    1.21
   8  27  -1    8.24    0.98
   7 -27  -1    0.41    0.70
  -7 -27   1    2.38    1.15
   7  27  -1    0.18    0.48
   6 -27  -1    1.35    0.63
  -6 -27   1    0.29    0.96
  -6  27   1    0.69    0.59
   6  27  -1    0.74    0.51
   5 -27  -1   23.41    1.32
  -5 -27   1   23.89    1.90
   5  27  -1   23.68    1.26
  -5  27   1   23.23    1.34
  -4 -27   1    1.63    1.06
   4 -27  -1    0.86    0.50
   4  27  -1    0.55    0.45
  -4  27   1   -0.17    0.48
   3 -27  -1   -0.20    0.42
  -3 -27   1    0.84    0.97
   3  27  -1    0.97    0.43
  -3  27   1   -0.20    0.44
   2 -27  -1   -0.37    0.34
   2 -27  -1    0.08    0.58
  -2 -27   1   -0.14    0.77
   2  27  -1    0.46    0.41
  -2  27   1   -0.07    0.44
   1 -27  -1    2.84    0.75
  -1 -27   1    1.76    0.94
   1 -27  -1    2.28    0.45
  -1  27   1    2.51    0.56
   1  27  -1    1.59    0.45
   0 -27   1    1.53    0.89
   0 -27  -1    2.12    0.77
   0  27  -1    2.38    0.51
   0  27   1    2.92    0.55
  -1 -27  -1    1.22    0.79
   1 -27   1   -0.04    0.68
   1 -27   1    0.46    0.30
  -1  27  -1    0.10    0.42
   1  27   1   -0.16    0.39
   2 -27   1    3.30    0.77
  -2 -27  -1    3.32    0.94
   2 -27   1    3.83    0.55
   2  27   1    2.52    0.53
  -2  27  -1    2.48    0.56
   3 -27   1    4.05    0.63
   3 -27   1    3.55    0.70
  -3 -27  -1    4.67    0.97
   3  27   1    4.23    0.63
  -3  27  -1    4.95    0.68
   4 -27   1   -0.36    0.41
  -4 -27  -1    0.12    0.78
  -4  27  -1    0.27    0.50
   4  27   1    0.09    0.42
   5 -27   1    2.74    0.72
  -5 -27  -1    3.31    1.11
   5  27   1    1.86    0.52
  -5  27  -1    0.71    0.54
  -6 -27  -1    2.33    0.98
   6 -27   1    1.47    0.73
   6  27   1    0.91    0.52
  -7 -27  -1    1.70    0.96
   7 -27   1    1.09    0.74
   7  27   1    1.10    0.54
   8 -28  -1    0.85    0.86
  -8 -28   1    1.64    1.25
   8  28  -1    1.50    0.60
  -7 -28   1    3.54    1.24
   7 -28  -1    2.00    0.80
   7  28  -1    1.47    0.59
  -6 -28   1    0.88    1.17
   6 -28  -1    1.48    0.67
   6  28  -1    1.03    0.54
  -6  28   1    0.29    0.58
  -5 -28   1    1.05    1.01
   5 -28  -1   -0.57    0.51
   5  28  -1   -0.10    0.41
  -5  28   1    0.78    0.59
   4 -28  -1    0.33    0.50
  -4 -28   1   -0.03    1.02
   4  28  -1    0.34    0.44
  -4  28   1   -0.75    0.48
  -3 -28   1   20.00    1.87
   3 -28  -1   21.14    1.09
  -3  28   1   20.90    1.23
   3  28  -1   20.04    1.08
  -2 -28   1    0.70    0.84
   2 -28  -1    0.14    0.37
   2 -28  -1   -0.45    0.56
  -2  28   1    0.50    0.47
   2  28  -1    0.40    0.43
   1 -28  -1    2.44    0.43
   1 -28  -1    2.26    0.77
  -1 -28   1    3.31    0.94
   1  28  -1    2.62    0.55
  -1  28   1    1.87    0.56
   0 -28   1    1.57    0.79
   0 -28  -1    1.06    0.67
   0  28   1    1.68    0.47
   0  28  -1    1.34    0.48
   1 -28   1    1.32    0.37
   1 -28   1    1.26    0.80
  -1 -28  -1    2.83    0.87
  -1  28  -1    1.31    0.43
   1  28   1    1.48    0.50
  -2 -28  -1    0.64    0.72
   2 -28   1   -0.38    0.31
   2 -28   1   -0.23    0.61
  -2  28  -1    0.21    0.45
   2  28   1   -0.24    0.41
   3 -28   1   -0.26    0.38
  -3 -28  -1    0.08    0.83
   3 -28   1   -0.74    0.48
  -3  28  -1   -0.57    0.43
   3  28   1   -0.32    0.39
  -4 -28  -1    0.72    0.86
   4 -28   1    0.38    0.49
   4  28   1    0.21    0.42
  -4  28  -1   -0.51    0.44
  -5 -28  -1    1.65    0.92
   5 -28   1    0.56    0.62
   5  28   1    0.51    0.44
  -5  28  -1   -0.01    0.53
  -6 -28  -1    0.86    1.01
   6 -28   1   -0.22    0.54
   6  28   1    0.57    0.47
   7 -28   1    1.20    0.68
  -7 -28  -1    1.83    0.97
   7  28   1    0.04    0.42
   7 -29  -1   -0.13    0.63
  -7 -29   1    0.93    1.07
   7  29  -1   -0.07    0.48
  -7  29   1    0.17    0.61
   6 -29  -1   -0.15    0.62
  -6 -29   1    1.06    1.18
   6  29  -1   -0.55    0.43
  -6  29   1   -0.14    0.58
   5 -29  -1    0.02    0.54
  -5 -29   1    2.34    1.12
   5  29  -1    0.43    0.47
  -5  29   1   -0.16    0.54
  -4 -29   1    2.47    1.21
   4 -29  -1    1.08    0.55
   4  29  -1    2.22    0.57
  -4  29   1    0.81    0.60
   3 -29  -1    2.40    0.55
  -3 -29   1    3.89    1.21
   3  29  -1    2.78    0.58
  -3  29   1    1.59    0.59
   2 -29  -1    8.78    1.01
  -2 -29   1   11.11    1.45
   2 -29  -1   10.77    0.81
   2  29  -1    9.50    0.89
  -2  29   1   10.05    0.96
   1 -29  -1    0.19    0.68
   1 -29  -1    0.36    0.33
  -1 -29   1    0.75    0.92
  -1  29   1    0.81    0.51
   1  29  -1    0.85    0.46
   0 -29  -1   -0.06    0.69
   0 -29   1    0.57    0.84
   0  29  -1    0.83    0.45
   0  29   1    1.38    0.51
  -1 -29  -1    2.81    0.90
   1 -29   1    1.97    0.51
   1 -29   1    1.23    0.81
  -1  29  -1    2.25    0.56
   1  29   1    1.84    0.53
  -2 -29  -1    3.64    1.02
   2 -29   1    3.43    0.54
   2 -29   1    1.99    0.77
   2  29   1    2.61    0.60
  -2  29  -1    3.99    0.66
   3 -29   1    0.11    0.42
   3 -29   1    0.07    0.55
  -3 -29  -1    0.92    0.81
   3  29   1    0.09    0.43
  -3  29  -1    0.76    0.48
   4 -29   1    1.38    0.57
  -4 -29  -1    2.02    1.01
  -4  29  -1    1.21    0.56
   4  29   1    1.53    0.53
  -5 -29  -1    7.26    1.41
   5 -29   1    5.16    0.89
  -5  29  -1    4.26    0.77
   5  29   1    4.87    0.71
   6 -29   1    0.57    0.66
  -6 -29  -1    1.75    1.12
   6  29   1    0.00    0.47
  -7 -29  -1   -0.03    0.88
   7 -29   1    1.63    0.72
   7  29   1    0.61    0.50
  -7 -30   1    5.23    1.38
   7 -30  -1    3.82    0.93
  -7  30   1    1.76    0.74
   7  30  -1    3.31    0.72
  -6 -30   1    2.88    1.43
   6 -30  -1    3.53    0.86
  -6  30   1    2.08    0.73
   6  30  -1    2.26    0.65
   5 -30  -1    0.10    0.54
  -5 -30   1    0.68    1.07
  -5  30   1    0.52    0.59
   5  30  -1    0.37    0.48
  -4 -30   1    0.29    1.11
   4 -30  -1    0.27    0.51
   4  30  -1    0.35    0.43
  -4  30   1   -0.56    0.49
   3 -30  -1    1.31    0.53
  -3 -30   1    0.13    1.03
  -3  30   1    1.91    0.64
   3  30  -1    1.42    0.54
  -2 -30   1   14.31    1.70
   2 -30  -1   12.26    0.84
  -2  30   1   13.17    1.04
   2  30  -1   11.81    0.97
  -1 -30   1    1.59    1.01
  -1  30   1    1.20    0.55
   1  30  -1    1.94    0.55
   0 -30   1    1.69    0.89
   0 -30  -1    1.93    0.84
   0  30   1    1.13    0.45
   0  30  -1    0.55    0.40
  -1 -30  -1    6.99    1.13
   1 -30   1    5.91    1.06
  -1  30  -1    6.25    0.74
   1  30   1    5.71    0.76
   2 -30   1   -0.06    0.33
  -2 -30  -1    0.91    0.79
   2 -30   1   -0.60    0.64
  -2  30  -1    0.03    0.45
   2  30   1    0.03    0.43
  -3 -30  -1    2.30    0.99
   3 -30   1    0.74    0.48
  -3  30  -1    0.53    0.51
   3  30   1    0.58    0.47
   4 -30   1    0.92    0.55
  -4 -30  -1    1.59    0.93
  -4  30  -1    0.49    0.53
   4  30   1    0.43    0.48
  -5 -30  -1    4.64    1.25
   5 -30   1    3.21    0.79
   5  30   1    2.79    0.63
  -5  30  -1    1.57    0.64
   6 -30   1    0.16    0.60
  -6 -30  -1    1.57    1.00
   6  30   1    0.20    0.47
   7 -30   1    1.92    0.78
   7 -31  -1    0.94    0.75
  -7 -31   1    1.81    1.21
   7  31  -1    1.77    0.64
   6 -31  -1    0.42    0.66
  -6 -31   1    2.00    1.31
   6  31  -1    0.48    0.53
  -6  31   1    0.25    0.66
  -5 -31   1    4.68    1.37
   5 -31  -1    4.71    0.85
  -5  31   1    4.30    0.86
   5  31  -1    3.57    0.71
   4 -31  -1    4.22    0.76
  -4 -31   1    5.19    1.30
   4  31  -1    4.04    0.72
  -4  31   1    3.06    0.75
   3 -31  -1    0.61    0.47
  -3 -31   1    0.04    1.06
  -3  31   1   -0.06    0.50
   3  31  -1    0.66    0.46
   2 -31  -1    0.26    0.38
  -2 -31   1    0.14    0.98
   2  31  -1   -0.78    0.39
  -2  31   1    0.38    0.50
  -1 -31   1    1.87    0.96
   1 -31  -1    1.23    0.77
   1  31  -1    1.37    0.54
  -1  31   1    2.18    0.57
   0 -31  -1    0.10    0.77
   0 -31   1   -0.15    0.75
   0  31   1    0.96    0.51
   0  31  -1   -0.24    0.42
  -1 -31  -1    3.14    0.91
   1 -31   1    1.76    0.88
  -1  31  -1    1.45    0.53
   1  31   1    1.57    0.51
   2 -31   1    0.65    0.73
   2 -31   1    1.88    0.46
  -2 -31  -1    2.42    1.00
  -2  31  -1    0.96    0.54
   2  31   1    1.35    0.48
   3 -31   1    4.12    0.66
  -3 -31  -1    2.95    1.00
  -3  31  -1    3.76    0.74
   3  31   1    4.39    0.72
   4 -31   1    0.10    0.51
  -4 -31  -1    1.95    1.12
   4  31   1    0.59    0.47
  -4  31  -1    0.73    0.57
  -5 -31  -1    8.52    1.43
   5 -31   1    8.43    1.04
   5  31   1    7.43    0.86
  -5  31  -1    8.25    0.97
  -6 -31  -1    3.70    1.16
   6 -31   1    2.52    0.77
   6  31   1    0.93    0.51
  -7 -32   1    3.38    1.63
   7 -32  -1   -0.01    0.70
   7  32  -1   -0.13    0.51
   6 -32  -1    0.67    0.68
  -6 -32   1    2.79    1.46
  -6  32   1    0.83    0.73
   6  32  -1    1.27    0.58
   5 -32  -1   -0.30    0.52
  -5 -32   1    0.01    1.09
   5  32  -1   -0.09    0.47
  -5  32   1    0.17    0.59
   4 -32  -1    1.13    0.58
  -4 -32   1    0.51    1.05
  -4  32   1    1.08    0.63
   4  32  -1    1.48    0.54
   3 -32  -1    4.97    0.72
  -3 -32   1    5.79    1.37
  -3  32   1    3.52    0.72
   3  32  -1    4.70    0.73
  -2 -32   1    4.54    1.27
   2 -32  -1    3.05    0.82
   2  32  -1    3.13    0.64
  -2  32   1    2.43    0.62
  -1 -32   1   -0.15    0.93
   1 -32  -1   -0.13    0.76
  -1  32   1    0.42    0.46
   1  32  -1    0.14    0.48
   0 -32   1    0.51    0.96
   0 -32  -1    0.71    0.85
   0  32   1   -0.23    0.40
   0  32  -1   -0.15    0.46
   1 -32   1   -0.20    0.80
  -1 -32  -1    1.51    0.91
  -1  32  -1    0.89    0.52
   1  32   1    0.62    0.49
   2 -32   1   -0.30    0.71
  -2 -32  -1    1.29    0.87
   2  32   1    1.82    0.57
  -2  32  -1    1.27    0.57
  -3 -32  -1    1.48    1.05
   3 -32   1    1.12    0.49
  -3  32  -1    0.06    0.51
   3  32   1    1.42    0.54
   4 -32   1    0.44    0.50
  -4 -32  -1    1.83    0.99
  -4  32  -1    0.52    0.60
   4  32   1    0.12    0.46
   5 -32   1    3.19    0.79
  -5 -32  -1    1.84    1.15
   5  32   1    2.84    0.64
  -5  32  -1    0.76    0.92
  -6 -32  -1    1.46    1.11
   6 -32   1    0.23    0.56
   6  32   1    0.35    0.51
  -6 -33   1    2.56    1.42
   6 -33  -1    0.33    0.64
  -6  33   1    0.84    0.66
   6  33  -1    0.32    0.54
  -5 -33   1    1.24    1.17
   5 -33  -1   -0.57    0.54
   5  33  -1    0.50    0.51
  -5  33   1   -0.46    0.58
  -4 -33   1    0.78    1.07
   4 -33  -1    0.45    0.52
  -4  33   1    0.94    0.64
   4  33  -1    0.66    0.51
  -3 -33   1   28.22    2.34
   3 -33  -1   27.37    1.34
  -3  33   1   30.21    1.53
   3  33  -1   30.55    1.47
  -2 -33   1    2.78    1.20
  -2  33   1    1.41    0.56
   2  33  -1    1.65    0.52
  -1 -33   1    0.05    0.99
   1 -33  -1   -0.59    0.77
  -1  33   1   -0.01    0.48
   1  33  -1    0.18    0.48
   0 -33  -1    0.14    0.87
   0 -33   1    0.20    0.94
   0  33   1    0.32    0.51
   0  33  -1    0.05    0.44
  -1 -33  -1    1.16    0.94
   1 -33   1   -0.56    0.81
  -1  33  -1   -0.32    0.43
   1  33   1   -0.32    0.48
  -2 -33  -1    0.76    0.94
   2 -33   1    0.05    0.73
  -2  33  -1    0.80    0.53
   2  33   1    0.34    0.51
  -3 -33  -1    0.68    1.02
   3 -33   1    0.39    0.47
  -3  33  -1   -0.55    0.47
   3  33   1   -0.19    0.43
  -4 -33  -1    3.65    1.24
   4 -33   1    5.82    0.86
  -4  33  -1    3.90    0.81
   4  33   1    3.19    0.68
   5 -33   1    0.71    0.57
  -5 -33  -1    1.14    1.12
   5  33   1    0.69    0.53
  -6 -33  -1    1.23    1.14
   6 -33   1    0.73    0.61
   6  33   1    0.64    0.54
   6 -34  -1    0.94    0.69
  -6 -34   1    0.75    1.35
  -6  34   1    0.32    0.68
   6  34  -1    0.08    0.50
  -5 -34   1    0.75    1.16
   5 -34  -1    1.07    0.64
   5  34  -1    0.21    0.52
  -5  34   1   -0.28    0.60
  -4 -34   1    1.28    1.16
   4 -34  -1    0.63    0.55
  -4  34   1    0.98    0.63
   4  34  -1   -0.13    0.50
  -3 -34   1   10.67    1.70
   3 -34  -1   12.71    1.30
   3  34  -1   11.31    1.05
  -3  34   1   11.54    1.15
  -2 -34   1    1.29    1.13
  -2  34   1    1.15    0.58
   2  34  -1    0.99    0.53
  -1 -34   1   -0.72    0.84
  -1  34   1    0.47    0.56
   1  34  -1   -0.02    0.48
   0 -34  -1    3.02    1.05
   0 -34   1    3.55    1.19
   0  34   1    3.22    0.66
   0  34  -1    3.05    0.67
   1 -34   1    0.85    0.88
  -1 -34  -1    2.11    0.98
  -1  34  -1    2.22    0.62
   1  34   1    2.08    0.64
  -2 -34  -1    1.43    1.00
  -2  34  -1    0.44    0.52
   2  34   1    0.81    0.56
  -3 -34  -1   12.43    1.61
   3  34   1   11.80    1.06
  -3  34  -1   11.56    1.07
  -4 -34  -1    2.71    1.23
   4 -34   1    1.19    0.62
   4  34   1    0.89    0.54
  -4  34  -1    1.21    0.66
  -5 -34  -1    4.92    1.26
   5 -34   1    2.30    0.71
   5  34   1    1.49    0.58
   6 -34   1    1.59    0.65
   6  34   1    0.03    0.50
  -6 -35   1    1.87    1.50
   6 -35  -1    0.26    0.61
  -6  35   1   -0.43    0.59
   6  35  -1    0.37    0.53
   5 -35  -1   -0.79    0.51
  -5 -35   1    1.20    1.20
   5  35  -1   -0.63    0.44
  -5  35   1   -0.07    0.59
  -4 -35   1    0.35    1.14
   4 -35  -1    0.53    0.54
   4  35  -1    0.44    0.51
  -4  35   1   -0.43    0.55
  -3 -35   1    0.87    1.21
  -3  35   1    1.27    0.68
   3  35  -1    0.67    0.46
  -2 -35   1    1.94    1.11
   2  35  -1    3.59    0.71
  -2  35   1    1.86    0.63
  -1 -35   1    1.27    1.10
   1  35  -1   -0.96    0.44
  -1  35   1    0.40    0.55
   0 -35  -1   -0.81    0.90
   0 -35   1   -0.47    0.94
   0  35  -1    0.48    0.55
   0  35   1    0.64    0.55
   1 -35   1    0.27    0.90
  -1 -35  -1    1.62    1.04
  -1  35  -1    0.75    0.56
   1  35   1    1.44    0.60
  -2 -35  -1   -0.51    0.92
   2  35   1    0.00    0.50
  -2  35  -1   -0.46    0.52
  -3 -35  -1    1.04    1.07
   3  35   1    1.09    0.57
  -3  35  -1    0.53    0.58
   4 -35   1    1.55    0.77
  -4 -35  -1    0.77    1.04
   4  35   1    0.62    0.51
  -4  35  -1    0.82    0.62
  -5 -35  -1    3.14    1.30
   5 -35   1    1.80    0.65
   5  35   1    2.45    0.66
   6 -36  -1    0.95    0.66
  -6  36   1   -0.46    0.66
  -5 -36   1    1.73    1.30
   5 -36  -1    0.28    0.59
  -5  36   1   -1.04    0.52
   5  36  -1    0.73    0.55
  -4 -36   1   -0.60    1.13
  -4  36   1    0.41    0.63
   4  36  -1    0.55    0.54
  -3 -36   1   -0.01    1.25
   3  36  -1    0.31    0.48
  -3  36   1   -0.06    0.59
  -2 -36   1    7.21    1.47
   2  36  -1    7.08    0.90
  -2  36   1    7.15    0.93
  -1 -36   1   -0.58    1.10
   1  36  -1    0.33    0.54
  -1  36   1   -0.14    0.52
   0 -36  -1   -1.77    0.84
   0 -36   1   -1.11    0.93
   0  36   1   -0.55    0.47
   0  36  -1    0.09    0.50
   1 -36   1   -0.16    0.93
  -1 -36  -1    0.32    1.01
   1  36   1    2.30    0.64
  -1  36  -1    1.16    0.57
  -2 -36  -1   -0.68    0.98
  -2  36  -1    0.15    0.55
   2  36   1    0.20    0.52
  -3 -36  -1    4.38    1.21
  -3  36  -1    3.21    0.81
   3  36   1    3.14    0.70
  -4 -36  -1    2.70    1.26
   4  36   1    2.01    0.63
  -4  36  -1    1.28    0.70
  -5 -36  -1    3.53    1.35
   5 -36   1    2.11    0.63
   5  36   1    1.35    0.59
   5 -37  -1    1.51    0.90
  -5 -37   1    0.97    1.30
   5  37  -1    0.51    0.57
  -5  37   1    0.05    0.67
  -4 -37   1    2.11    1.31
  -4  37   1    0.83    0.73
   4  37  -1    1.63    0.62
  -3 -37   1    4.59    1.50
   3  37  -1    5.39    0.84
  -3  37   1    4.13    0.86
  -2 -37   1    0.98    1.11
  -2  37   1    1.27    0.61
   2  37  -1    2.04    0.65
  -1 -37   1    1.23    1.19
   1  37  -1    1.53    0.60
  -1  37   1    1.04    0.64
   0 -37   1   -0.12    1.01
   0 -37  -1   -1.07    0.97
   0  37   1    1.09    0.61
   0  37  -1    0.48    0.55
   1 -37   1   -2.30    1.52
  -1 -37  -1   -0.49    1.03
  -1  37  -1    1.05    0.63
   1  37   1    1.12    0.62
  -2 -37  -1    2.36    1.08
  -2  37  -1    2.68    0.72
   2  37   1    1.42    0.64
  -3 -37  -1    1.63    1.15
  -3  37  -1    0.05    0.57
   3  37   1   -0.08    0.52
  -4 -37  -1    1.22    1.21
  -4  37  -1   -0.46    0.51
   4  37   1    0.29    0.51
   5  37   1    0.25    0.54
  -5 -38   1    0.99    1.56
  -5  38   1    0.61    0.76
   5  38  -1    1.97    0.85
  -4 -38   1   -1.60    1.12
  -4  38   1   -0.20    0.64
  -3 -38   1    0.05    1.32
  -3  38   1    0.10    0.61
   3  38  -1    0.65    0.54
  -2 -38   1   -0.48    1.06
   2  38  -1    0.92    0.62
  -2  38   1    0.81    0.66
  -1 -38   1   -1.93    1.09
  -1  38   1    0.51    0.61
   1  38  -1    0.42    0.57
   0  38  -1    0.34    0.56
   0  38   1    0.09    0.53
  -1 -38  -1    2.54    1.24
  -1  38  -1    2.19    0.70
   1  38   1    2.03    0.71
  -2 -38  -1    2.60    1.24
   2  38   1    2.25    0.69
  -2  38  -1    2.99    0.77
  -3 -38  -1    2.06    1.22
   3  38   1    1.18    0.62
  -3  38  -1    0.96    0.68
  -4 -38  -1   -1.15    0.96
   4  38   1    0.10    0.54
  -4  38  -1   -0.61    0.54
  -4 -39   1   -0.56    1.24
   4  39  -1    1.42    0.60
  -4  39   1    0.47    0.71
  -3 -39   1    0.03    1.39
  -3  39   1    0.12    0.63
   3  39  -1    1.30    0.57
  -2 -39   1   -1.20    1.18
  -2  39   1   -0.38    0.54
   2  39  -1    0.83    0.60
  -1 -39   1   -1.02    1.21
   1  39  -1    3.19    0.79
  -1  39   1    2.21    0.75
   0  39  -1    0.22    0.57
   0  39   1   -0.72    0.53
  -1  39  -1    0.79    0.64
   1  39   1    0.63    0.55
  -2 -39  -1   -1.43    1.11
   2  39   1    0.50    0.57
  -2  39  -1    0.10    0.58
  -3 -39  -1   -2.37    1.05
  -3  39  -1   -0.03    0.65
   3  39   1   -0.46    0.51
  -4 -39  -1   -1.09    1.15
   4  39   1    0.47    0.61
  -4  39  -1   -0.77    0.56
  -4 -40   1   -0.45    1.35
  -4  40   1    1.86    0.76
  -3 -40   1   -2.92    1.34
  -3  40   1    0.67    0.65
   3  40  -1    0.73    0.57
  -2 -40   1   -2.11    1.24
   2  40  -1   -0.09    0.52
  -2  40   1    0.20    0.66
   1  40  -1    0.49    0.58
  -1  40   1   -0.46    0.57
   0  40  -1    0.09    0.58
   0  40   1    0.28    0.61
   1  40   1    0.22    0.59
  -1  40  -1   -0.91    0.51
  -2 -40  -1   -1.21    1.18
  -2  40  -1   -0.79    0.51
   2  40   1    0.49    0.56
  -3 -40  -1   -1.40    1.25
  -3  40  -1    1.91    0.77
   3  40   1    2.19    0.68
   3  41  -1   -0.52    0.47
  -3  41   1   -0.66    0.63
  -2  41   1    1.95    0.76
   2  41  -1    2.33    0.71
   1  41  -1   -0.45    0.51
  -1  41   1   -0.64    0.59
   0  41   1    1.67    0.69
   0  41  -1    1.87    0.72
  -1  41  -1   -0.19    0.57
   1  41   1    0.64    0.59
  -2  41  -1    6.46    1.05
   2  41   1    5.09    0.91
  -3  41  -1   -0.33    0.61
   2  42  -1   -0.07    0.58
  -2  42   1    0.73    0.67
   1  42  -1    0.53    0.60
  -1  42   1    1.00    0.71
   0  42   1    1.28    0.76
   0  42  -1    1.97    0.71
  -1  42  -1   -0.24    0.59
   1  42   1    0.35    0.61
  -2  42  -1   -0.02    0.69
   0  43  -1   -0.19    0.62
  -1  43  -1    0.67    1.04
   9   0  -2    0.57    0.51
  -8   0   2    2.88    0.68
   8   0  -2    1.41    0.52
  -7   0   2    1.66    0.51
   7   0  -2    0.53    0.42
   7   0  -2    0.09    0.36
   6   0  -2   -0.22    0.38
  -6   0   2    0.57    0.46
   6   0  -2    0.24    0.38
   5   0  -2    1.56    0.38
   5   0  -2    0.99    0.33
   4   0  -2    0.75    0.32
  -4   0   2    1.09    0.38
   4   0  -2    0.60    0.31
  -3   0   2  134.80    2.70
   3   0  -2  131.78    2.18
   3   0  -2  132.95    2.23
   2   0  -2   17.58    0.56
   2   0  -2   18.54    0.57
  -2   0   2   16.76    0.63
   1   0  -2   15.27    0.51
   1   0  -2   13.59    0.41
  -1   0   2   14.23    0.56
   0   0  -2  782.91   11.76
   0   0   2  738.26   13.74
   1   0   2  123.75    2.58
  -1   0  -2  123.60    1.61
  -1   0  -2  121.57    2.05
   1   0   2  117.93    1.60
   2   0   2    1.03    0.36
   2   0   2    0.97    0.15
  -2   0  -2    0.88    0.29
   3   0   2   13.01    0.43
   3   0   2   14.25    0.90
  -3   0  -2   12.95    0.69
  -4   0  -2   -0.04    0.30
   4   0   2   -0.09    0.42
   4   0   2   -0.08    0.19
   5   0   2    5.09    0.79
  -5   0  -2    6.08    0.70
  -6   0  -2   19.86    1.11
   6   0   2   21.67    1.40
   7   0   2    1.99    0.73
  -7   0  -2    1.41    0.56
  -8   0  -2    9.37    0.99
   8   0   2    8.56    1.20
   9   0   2    2.50    0.95
  -9   0  -2    4.05    0.77
  10  -1  -2    0.58    0.53
   9  -1  -2    0.54    0.52
   9   1  -2    1.02    0.51
   8  -1  -2    2.70    0.61
  -8  -1   2    3.44    0.66
   8   1  -2    2.94    0.59
   7  -1  -2    0.64    0.44
  -7  -1   2    0.44    0.44
   7   1  -2    0.14    0.38
   7   1  -2   -0.18    0.36
  -7   1   2    0.62    0.39
  -6  -1   2    2.33    0.56
   6  -1  -2    1.54    0.44
   6  -1  -2    2.26    0.51
   6   1  -2    2.12    0.47
   6   1  -2    1.13    0.44
   5  -1  -2   21.92    0.85
   5  -1  -2   20.18    0.91
  -5  -1   2   20.96    0.96
   5  -1  -2   19.72    0.82
   5   1  -2   21.93    0.86
   5   1  -2   20.71    0.84
  -4  -1   2    9.88    0.67
   4  -1  -2    9.58    0.55
   4  -1  -2    9.40    0.62
   4   1  -2   10.36    0.63
  -4   1   2   10.15    0.63
   4   1  -2    9.76    0.58
   3  -1  -2    7.15    0.45
  -3  -1   2    5.31    0.59
   3  -1  -2    7.44    0.45
  -3   1   2    6.29    0.49
   3   1  -2    6.61    0.44
   3   1  -2    6.96    0.45
  -2  -1   2  122.90    2.45
   2  -1  -2  122.46    2.01
   2  -1  -2  124.99    1.94
   2   1  -2  122.98    1.97
  -2   1   2  120.98    2.34
   2   1  -2  127.43    1.95
   1  -1  -2  284.71    3.82
  -1  -1   2  279.82    5.09
   1  -1  -2  284.37    4.07
   1   1  -2  286.69    3.82
   1   1  -2  279.91    4.03
  -1   1   2  275.20    5.09
   0  -1  -2  243.88    3.53
   0  -1   2  236.13    4.43
   0   1  -2  235.13    3.52
   0   1  -2  243.74    3.12
   0   1   2  234.59    4.41
   1  -1   2   29.75    0.99
  -1  -1  -2   30.61    0.80
   1   1   2   30.19    0.99
   1   1   2   30.22    0.49
  -1   1  -2   30.15    0.80
  -2  -1  -2    2.74    0.39
   2  -1   2    2.82    0.45
   2   1   2    2.36    0.23
   2   1   2    2.13    0.45
  -2   1  -2    3.10    0.41
  -3  -1  -2    7.25    0.54
   3  -1   2    7.75    0.68
   3  -1   2    7.75    0.35
   3   1   2    7.82    0.71
   3   1   2    8.09    0.37
  -3   1  -2    8.05    0.58
   4  -1   2    6.62    0.80
  -4  -1  -2    7.62    0.60
  -4   1  -2    7.00    0.68
   4   1   2    7.32    0.42
   4   1   2    7.12    0.77
  -5  -1  -2   -0.11    0.38
   5  -1   2   -0.17    0.47
  -5   1  -2    0.42    0.44
   5   1   2   -0.25    0.49
   5   1   2    0.43    0.26
  -6  -1  -2   -0.15    0.41
   6  -1   2    1.54    0.58
   6   1   2    0.83    0.56
  -6   1  -2    0.48    0.47
   7  -1   2    1.56    0.66
  -7  -1  -2    1.81    0.56
   7   1   2    1.55    0.72
  -7   1  -2    1.47    0.58
   8  -1   2    1.94    0.76
  -8  -1  -2    1.08    0.56
  -8   1  -2    2.01    0.63
   8   1   2    2.07    0.87
   9  -1   2   -0.30    0.77
  -9  -1  -2    1.81    0.58
   9   1   2   -0.97    0.69
  -9   1  -2    1.72    0.60
  10  -2  -2    0.49    0.52
   9  -2  -2   -0.36    0.47
   9   2  -2   -0.33    0.41
   8  -2  -2    4.71    0.67
  -8  -2   2    7.62    0.94
   8   2  -2    5.36    0.69
   8   2  -2    4.20    0.63
   7  -2  -2   -0.26    0.39
  -7  -2   2    0.51    0.47
   7   2  -2    0.53    0.40
  -7   2   2    1.01    0.42
   7   2  -2    0.37    0.39
   6  -2  -2   -0.35    0.43
   6  -2  -2    0.44    0.38
  -6  -2   2    0.44    0.49
   6   2  -2   -0.03    0.35
   6   2  -2   -0.69    0.35
   5  -2  -2    0.34    0.34
  -5  -2   2   -0.18    0.37
   5  -2  -2    0.59    0.32
   5  -2  -2    0.01    0.36
   5   2  -2    0.10    0.30
   5   2  -2    0.11    0.31
  -4  -2   2    5.58    0.60
   4  -2  -2    5.52    0.50
   4  -2  -2    5.23    0.52
   4  -2  -2    5.51    0.55
   4   2  -2    6.28    0.55
   4   2  -2    4.81    0.47
   3  -2  -2    2.86    0.31
  -3  -2   2    1.80    0.41
   3  -2  -2    3.03    0.38
  -3   2   2    2.10    0.32
   3   2  -2    2.85    0.31
   3   2  -2    2.52    0.31
  -2  -2   2    3.83    0.42
   2  -2  -2    4.25    0.44
   2  -2  -2    3.96    0.38
   2   2  -2    4.00    0.33
  -2   2   2    3.41    0.33
   2   2  -2    4.38    0.37
   1  -2  -2    2.68    0.31
  -1  -2   2    1.95    0.38
  -1   2   2    3.00    0.29
   1   2  -2    3.06    0.32
   1   2  -2    2.20    0.21
   0  -2   2   22.56    0.75
   0  -2  -2   16.88    0.59
   0   2  -2   16.73    0.61
   0   2   2   19.94    0.66
   0   2  -2   18.38    0.37
  -1  -2  -2    6.32    0.43
   1  -2   2    6.94    0.54
  -1   2  -2    6.47    0.42
   1   2   2    6.52    0.56
   1   2   2    6.32    0.24
  -2  -2  -2   18.68    0.71
   2  -2   2   18.74    0.87
   2   2   2   17.57    0.88
  -2   2  -2   17.94    0.71
   2   2   2   17.94    0.45
  -3  -2  -2    4.46    0.47
   3  -2   2    4.74    0.59
  -3   2  -2    4.74    0.52
   3   2   2    4.30    0.31
   3   2   2    4.73    0.65
   4  -2   2    1.71    0.48
  -4  -2  -2    1.63    0.41
  -4   2  -2    1.64    0.42
   4   2   2    1.88    0.27
   4   2   2    2.09    0.54
   5  -2   2    0.77    0.51
  -5  -2  -2    1.15    0.46
   5   2   2    0.09    0.61
   5   2   2    0.85    0.28
  -5   2  -2    0.91    0.45
  -6  -2  -2    0.54    0.44
   6  -2   2    0.07    0.54
   6   2   2    0.47    0.60
   6   2   2   -0.24    0.28
  -6   2  -2   -0.41    0.43
   7  -2   2    2.16    0.73
  -7  -2  -2    2.11    0.55
  -7   2  -2    1.74    0.54
   7   2   2    1.44    0.73
  -8  -2  -2    2.31    0.60
   8  -2   2    2.07    0.75
  -8   2  -2    1.12    0.61
   8   2   2    1.76    0.77
  -9  -2  -2    0.43    0.48
   9   2   2    0.59    0.89
  -9   2  -2    0.49    0.55
  10  -3  -2    1.09    0.57
   9  -3  -2    0.68    0.52
   9   3  -2    0.56    0.46
  -8  -3   2    1.06    0.56
   8  -3  -2    0.15    0.47
   8   3  -2   -0.42    0.37
   8   3  -2    0.16    0.45
   7  -3  -2    0.02    0.42
  -7  -3   2    0.76    0.50
   7   3  -2   -0.15    0.34
   7   3  -2    0.24    0.40
   6  -3  -2    2.29    0.55
  -6  -3   2    3.13    0.65
   6  -3  -2    2.01    0.51
   6   3  -2    2.47    0.46
   6   3  -2    1.16    0.46
   5  -3  -2    4.53    0.55
  -5  -3   2    2.83    0.52
   5  -3  -2    4.57    0.55
   5   3  -2    4.41    0.46
   5   3  -2    4.07    0.46
   4  -3  -2    2.63    0.34
   4  -3  -2    2.60    0.43
  -4  -3   2    2.55    0.49
   4   3  -2    2.46    0.37
   4   3  -2    2.61    0.35
  -3  -3   2    0.21    0.37
   3  -3  -2    1.89    0.35
  -3   3   2    0.76    0.27
   3   3  -2    0.83    0.28
   3   3  -2    1.51    0.26
  -2  -3   2  117.67    2.49
   2  -3  -2  121.75    2.02
   2   3  -2  119.51    1.89
   2   3  -2  119.66    1.87
  -2   3   2  122.32    2.17
   1  -3  -2  344.38    4.95
  -1  -3   2  335.83    6.25
   1   3  -2  346.63    4.63
  -1   3   2  350.20    6.14
   1   3  -2  347.33    5.00
   0  -3  -2    0.11    0.29
   0   3   2    0.28    0.23
   0   3   2    0.34    0.14
  -1  -3  -2  145.29    2.35
   1  -3   2  143.01    2.98
   1   3   2  146.09    3.00
   1   3   2  142.05    2.02
  -1   3  -2  140.40    2.37
  -1   3  -2  147.70    1.92
  -2  -3  -2    2.71    0.36
   2  -3   2    3.41    0.47
  -2   3  -2    2.65    0.39
   2   3   2    2.76    0.46
   2   3   2    2.86    0.27
  -3  -3  -2    3.44    0.40
   3  -3   2    4.10    0.46
   3  -3   2    4.72    0.57
   3   3   2    3.50    0.56
   3   3   2    4.04    0.33
  -4  -3  -2    3.93    0.51
   4  -3   2    4.05    0.60
   4   3   2    4.42    0.41
   4   3   2    4.50    0.69
  -5  -3  -2    1.22    0.46
   5  -3   2    0.71    0.48
   5   3   2    1.08    0.31
  -5   3  -2    0.99    0.46
   5   3   2    0.99    0.66
   6  -3   2    9.35    0.94
  -6  -3  -2    9.53    0.82
  -6   3  -2    9.58    0.92
   6   3   2    7.99    0.59
   6   3   2   10.28    1.05
   7  -3   2    3.73    0.82
  -7  -3  -2    3.61    0.64
   7   3   2    3.41    0.85
  -7   3  -2    3.80    0.72
   8  -3   2    1.43    0.71
  -8  -3  -2    1.87    0.57
  -8   3  -2    1.69    0.64
   8   3   2    1.16    0.82
  -9   3  -2    2.21    0.71
   9   3   2   -1.13    0.81
  10  -4  -2    0.74    0.56
   9  -4  -2    0.53    0.52
  -8  -4   2    2.28    0.69
   8  -4  -2    1.70    0.59
   8   4  -2    0.99    0.48
   8   4  -2    1.27    0.51
   7  -4  -2    0.02    0.47
  -7  -4   2    1.44    0.59
   7  -4  -2    0.02    0.47
   7   4  -2    1.03    0.44
   7   4  -2    1.28    0.41
   6  -4  -2    0.70    0.48
   6  -4  -2    0.19    0.41
  -6  -4   2   -0.13    0.52
   6   4  -2    0.07    0.35
   6   4  -2    0.00    0.39
   5  -4  -2   16.74    0.80
  -5  -4   2   16.90    0.99
   5  -4  -2   17.67    0.88
   5   4  -2   16.62    0.70
   5   4  -2   16.36    0.82
   4  -4  -2   16.48    0.73
  -4  -4   2   16.94    0.94
   4  -4  -2   17.78    0.67
   4   4  -2   16.64    0.72
   4   4  -2   16.52    0.63
  -3  -4   2   12.54    0.77
   3  -4  -2   14.30    0.66
  -3   4   2   12.89    0.50
   3   4  -2   12.67    0.60
   3   4  -2   14.05    0.50
   2  -4  -2  147.79    2.42
  -2  -4   2  146.70    3.03
   2   4  -2  151.17    2.23
   2   4  -2  150.32    2.28
   1  -4  -2    9.60    0.51
  -1  -4   2    8.46    0.73
   1   4  -2    8.99    0.37
  -1   4   2    8.26    0.33
   1   4  -2    7.86    0.34
   0  -4   2   70.46    1.65
   0  -4  -2   67.58    1.29
   0   4  -2   69.62    1.26
   0   4  -2   70.30    1.07
   0   4   2   72.20    1.55
   0   4   2   71.40    1.13
  -1  -4  -2    1.30    0.25
   1  -4   2    1.87    0.36
   1   4   2    1.47    0.17
   1   4   2    1.42    0.34
  -1   4  -2    1.85    0.30
   2  -4   2   15.06    0.78
  -2  -4  -2   13.73    0.62
   2  -4   2   14.55    0.65
   2   4   2   14.82    0.82
   2   4   2   15.07    0.44
   3  -4   2    1.45    0.41
  -3  -4  -2    1.68    0.35
   3  -4   2    2.08    0.47
   3   4   2    1.68    0.24
   3   4   2    1.83    0.53
  -4  -4  -2    0.34    0.33
   4  -4   2    0.48    0.44
   4  -4   2    0.68    0.43
   4   4   2    0.69    0.23
   4   4   2    0.88    0.56
   5  -4   2    3.36    0.62
  -5  -4  -2    2.64    0.47
  -5   4  -2    3.28    0.64
   5   4   2    3.66    0.80
   5   4   2    3.54    0.39
   6  -4   2    1.45    0.62
  -6  -4  -2    1.02    0.45
   6   4   2    1.39    0.70
  -6   4  -2    0.93    0.50
   6   4   2    0.82    0.34
   7  -4   2    0.96    0.61
  -7  -4  -2    0.57    0.46
   7   4   2    1.03    0.65
  -7   4  -2    0.70    0.55
   8  -4   2   12.61    1.26
  -8  -4  -2   15.23    1.07
  -8   4  -2   11.77    1.14
   8   4   2   11.93    1.45
   9   4   2   -1.25    0.77
  -9   4  -2    1.17    0.62
  10  -5  -2    2.26    0.67
   9  -5  -2    0.17    0.51
   9   5  -2   -0.97    0.46
  -8  -5   2   15.28    1.19
   8  -5  -2   12.68    1.03
   8   5  -2   12.21    0.88
   8   5  -2   11.50    0.92
   7  -5  -2   -0.42    0.58
  -7  -5   2    0.33    0.52
   7  -5  -2    0.32    0.47
   7   5  -2    0.13    0.36
   7   5  -2   -0.06    0.39
   6  -5  -2   13.95    0.84
   6  -5  -2   16.09    1.01
  -6  -5   2   13.22    1.15
   6   5  -2   15.30    0.88
   6   5  -2   12.53    0.76
   5  -5  -2   15.92    0.73
  -5  -5   2   15.29    1.00
   5  -5  -2   17.17    0.89
   5   5  -2   15.39    0.68
   5   5  -2   16.72    0.82
   4  -5  -2   -0.06    0.21
   4  -5  -2    0.14    0.34
  -4  -5   2   -0.37    0.33
   4   5  -2    0.09    0.26
   4   5  -2    0.13    0.21
   3  -5  -2   32.11    0.94
  -3  -5   2   31.90    1.15
   3   5  -2   32.71    0.73
   3   5  -2   32.61    0.88
  -2  -5   2  149.29    3.11
   2  -5  -2  151.13    2.48
   2   5  -2  151.54    2.23
   2   5  -2  150.20    2.32
   1  -5  -2   53.90    1.09
  -1  -5   2   55.43    1.43
   1   5  -2   54.79    0.93
  -1   5   2   51.10    1.09
   1   5  -2   54.90    0.97
   0  -5  -2   -0.51    0.23
   0  -5   2    0.07    0.32
   0   5  -2   -0.23    0.18
   0   5   2    0.21    0.15
   0   5   2    0.16    0.21
   0   5  -2    0.07    0.13
  -1  -5  -2    4.00    0.38
   1  -5   2    4.16    0.51
  -1   5  -2    4.25    0.22
   1   5   2    4.46    0.50
   1   5   2    4.00    0.27
  -1   5  -2    4.19    0.43
  -2  -5  -2   -0.57    0.23
   2  -5   2    0.31    0.31
   2  -5   2    0.49    0.28
   2   5   2   -0.02    0.16
   2   5   2   -0.09    0.35
  -3  -5  -2    1.49    0.33
   3  -5   2    2.05    0.44
   3  -5   2    2.51    0.44
   3   5   2    2.11    0.52
   3   5   2    2.11    0.26
  -4  -5  -2    1.34    0.37
   4  -5   2    1.77    0.47
   4  -5   2    1.29    0.48
   4   5   2    1.21    0.27
   4   5   2    1.61    0.56
   5  -5   2    4.34    0.68
   5  -5   2    3.32    0.64
  -5  -5  -2    3.26    0.53
   5   5   2    3.07    0.39
   5   5   2    4.06    0.82
   6  -5   2    8.87    0.97
  -6  -5  -2    8.49    0.77
   6   5   2    6.90    0.59
  -6   5  -2    8.30    0.91
   6   5   2    8.22    1.04
  -7  -5  -2    0.86    0.46
   7  -5   2    1.38    0.63
   7   5   2    1.04    0.69
  -7   5  -2    1.48    0.62
   8  -5   2    7.79    1.09
  -8  -5  -2   11.07    1.02
  -8   5  -2    6.34    0.91
   8   5   2    7.22    1.25
   9   5   2   -1.16    0.88
  -9   5  -2    1.40    0.62
  10  -6  -2    1.24    0.58
   9  -6  -2    2.49    0.67
  -9  -6   2    4.11    0.82
   9   6  -2    1.58    0.62
   8  -6  -2    6.73    0.86
  -8  -6   2    9.04    1.10
   8   6  -2    6.88    0.70
   8   6  -2    5.78    0.71
  -7  -6   2    0.82    0.62
   7  -6  -2    0.92    0.51
   7   6  -2    1.09    0.39
   7   6  -2    1.57    0.49
   6  -6  -2    5.80    0.68
  -6  -6   2    4.12    0.82
   6  -6  -2    5.93    0.65
   6   6  -2    5.84    0.59
   6   6  -2    5.32    0.61
   5  -6  -2    2.30    0.37
   5  -6  -2    1.88    0.44
  -5  -6   2    2.12    0.59
   5   6  -2    1.88    0.43
   5   6  -2    2.30    0.36
   4  -6  -2    6.70    0.42
   4  -6  -2    7.08    0.63
  -4  -6   2    5.21    0.69
   4   6  -2    6.12    0.54
   4   6  -2    7.04    0.44
  -3  -6   2  111.72    2.62
   3  -6  -2  109.98    2.06
   3  -6  -2  111.40    2.04
   3   6  -2  109.90    1.77
   3   6  -2  112.47    1.95
   2  -6  -2    5.59    0.47
  -2  -6   2    6.44    0.71
   2   6  -2    5.50    0.31
   2   6  -2    6.14    0.47
   1  -6  -2   19.15    0.60
  -1  -6   2   19.01    0.88
   1   6  -2   19.51    0.54
   1   6  -2   18.80    0.45
  -1   6   2   19.00    0.53
   0  -6  -2   18.18    0.59
   0  -6   2   18.21    0.80
   0   6  -2   18.36    0.46
   0   6   2   18.18    0.52
   0   6  -2   18.23    0.54
   0   6   2   18.87    0.66
  -1  -6  -2   -0.24    0.23
   1  -6   2    0.25    0.32
  -1   6  -2    0.37    0.14
   1   6   2    0.15    0.31
   1   6   2    0.30    0.16
  -1   6  -2   -0.05    0.24
  -2  -6  -2   10.54    0.54
   2  -6   2   11.38    0.63
   2  -6   2   11.22    0.75
   2   6   2   11.84    0.45
   2   6   2   10.94    0.85
  -2   6  -2   10.68    0.40
   3  -6   2    1.34    0.40
   3  -6   2    0.94    0.40
  -3  -6  -2    0.88    0.31
   3   6   2    0.43    0.43
   3   6   2    1.31    0.23
   4  -6   2    0.90    0.38
   4  -6   2    0.59    0.39
  -4  -6  -2    0.97    0.34
   4   6   2    0.72    0.26
   4   6   2    0.56    0.49
  -5  -6  -2   22.78    1.01
   5  -6   2   22.01    1.24
   5  -6   2   23.39    1.12
   5   6   2   22.35    1.46
   5   6   2   22.60    0.84
   6  -6   2    8.18    0.93
  -6  -6  -2    6.84    0.74
   6   6   2    7.64    0.60
   6   6   2    8.13    1.08
  -6   6  -2    7.19    0.87
  -7  -6  -2    1.73    0.52
   7  -6   2    1.80    0.66
   7   6   2    2.00    0.83
  -7   6  -2    1.90    0.60
   8  -6   2    1.10    0.64
  -8  -6  -2    0.77    0.49
  -8   6  -2    0.33    0.61
   8   6   2    0.56    0.87
   9   6   2   -1.55    0.84
  -9   6  -2    1.03    0.60
  10  -7  -2   -0.17    0.51
  -9  -7   2    2.30    0.72
   9  -7  -2    0.18    0.56
   9   7  -2    0.03    0.54
   8  -7  -2    0.22    0.54
  -8  -7   2    0.88    0.54
   8   7  -2    0.25    0.43
  -7  -7   2    7.52    1.00
   7  -7  -2    6.64    0.79
   7   7  -2    7.11    0.73
   7   7  -2    6.78    0.65
   6  -7  -2    4.03    0.65
   6  -7  -2    3.70    0.49
  -6  -7   2    3.20    0.72
   6   7  -2    3.38    0.46
   6   7  -2    3.64    0.52
   5  -7  -2    0.16    0.27
  -5  -7   2   -0.23    0.50
   5  -7  -2    0.09    0.40
   5   7  -2   -0.48    0.35
   5   7  -2    0.07    0.25
   4  -7  -2    1.28    0.24
  -4  -7   2    0.48    0.51
   4  -7  -2    1.63    0.40
   4   7  -2    1.53    0.34
   4   7  -2    1.08    0.24
   3  -7  -2    1.44    0.15
  -3  -7   2   -0.09    0.49
   3  -7  -2    1.16    0.35
   3   7  -2    1.31    0.19
   3   7  -2    1.07    0.29
  -2  -7   2    0.18    0.46
   2  -7  -2    0.49    0.30
   2   7  -2    0.38    0.25
   2   7  -2    0.31    0.16
   1  -7  -2    0.90    0.30
  -1  -7   2    1.39    0.47
   1   7  -2    0.47    0.21
   1   7  -2    0.43    0.14
  -1   7   2    0.55    0.19
   0  -7  -2    2.93    0.33
   0  -7   2    2.91    0.47
   0   7   2    3.12    0.32
   0   7   2    2.86    0.36
   0   7  -2    2.39    0.26
   0   7  -2    2.65    0.27
   1  -7   2    0.87    0.26
  -1  -7  -2    1.55    0.29
   1  -7   2    1.95    0.41
   1   7   2    1.67    0.22
   1   7   2    1.58    0.41
  -1   7  -2    1.99    0.21
   2  -7   2    0.77    0.37
  -2  -7  -2    0.33    0.27
   2  -7   2   -0.24    0.32
   2   7   2    0.86    0.20
  -2   7  -2    0.37    0.18
   2   7   2    0.64    0.44
  -3  -7  -2    8.78    0.57
   3  -7   2    9.92    0.73
   3  -7   2    9.48    0.64
   3   7   2    9.54    0.48
   3   7   2    9.22    0.84
   4  -7   2    9.92    0.84
  -4  -7  -2    9.67    0.64
   4  -7   2    9.90    0.78
   4   7   2   10.78    0.96
   4   7   2    9.54    0.54
   5  -7   2    0.46    0.50
   5  -7   2    1.32    0.53
  -5  -7  -2    0.99    0.42
   5   7   2    1.33    0.33
   5   7   2    1.19    0.71
  -6  -7  -2    3.63    0.58
   6  -7   2    3.51    0.70
   6   7   2    3.04    0.81
   6   7   2    2.28    0.40
  -6   7  -2    2.73    0.63
   7  -7   2    1.76    0.66
  -7  -7  -2    0.72    0.44
  -7   7  -2    1.25    0.58
   7   7   2    1.06    0.82
   8  -7   2    0.47    0.57
   8   7   2   -0.63    0.73
  -8   7  -2    0.47    0.62
   9   7   2   -0.12    1.05
  -9   7  -2    3.12    0.78
  10  -8  -2    2.03    0.72
   9  -8  -2    2.20    0.66
  -9  -8   2    3.79    0.86
   9   8  -2    1.19    0.60
  -8  -8   2    2.40    0.74
   8  -8  -2    2.13    0.66
   8   8  -2    1.12    0.51
  -7  -8   2    1.77    0.70
   7  -8  -2    0.23    0.44
   7   8  -2    1.83    0.49
   7   8  -2    1.95    0.42
   6  -8  -2    1.81    0.41
  -6  -8   2    1.90    0.63
   6  -8  -2    1.35    0.53
   6   8  -2    1.89    0.38
   6   8  -2    1.85    0.46
   5  -8  -2    4.43    0.45
  -5  -8   2    4.34    0.77
   5  -8  -2    3.87    0.60
   5   8  -2    3.83    0.53
   5   8  -2    4.61    0.45
   4  -8  -2   19.81    0.89
   4  -8  -2   20.44    0.62
  -4  -8   2   21.27    1.16
   4   8  -2   20.90    0.60
   4   8  -2   20.42    0.78
  -3  -8   2   13.28    0.92
   3  -8  -2   12.88    0.72
   3  -8  -2   13.20    0.34
  -3   8   2   13.88    0.42
   3   8  -2   12.62    0.39
   3   8  -2   11.83    0.59
  -2  -8   2   12.99    1.00
   2  -8  -2   12.22    0.61
   2   8  -2   13.15    0.34
   2   8  -2   13.45    0.57
   1  -8  -2   65.91    1.31
  -1  -8   2   67.16    1.83
   1  -8  -2   64.17    1.39
  -1   8   2   66.00    1.26
   1   8  -2   63.98    1.20
   1   8  -2   64.73    1.08
   0  -8   2    5.20    0.69
   0  -8  -2    5.38    0.48
   0   8   2    5.04    0.51
   0   8  -2    5.24    0.32
   0   8  -2    4.76    0.34
   0   8   2    5.90    0.40
   1  -8   2    1.53    0.31
   1  -8   2    2.03    0.44
  -1  -8  -2    1.66    0.30
   1   8   2    1.50    0.42
   1   8   2    1.58    0.24
  -1   8  -2    1.84    0.22
  -2  -8  -2   21.52    0.71
   2  -8   2   21.35    0.83
   2  -8   2   21.66    0.98
   2   8   2   21.71    0.65
  -2   8  -2   21.09    0.58
   2   8   2   20.69    1.05
  -3  -8  -2    0.73    0.30
   3  -8   2    0.87    0.37
   3  -8   2    0.86    0.34
   3   8   2    0.67    0.44
  -3   8  -2    0.71    0.24
   3   8   2    0.55    0.22
   4  -8   2    0.18    0.36
  -4  -8  -2    0.04    0.30
   4  -8   2    0.03    0.39
   4   8   2   -0.28    0.50
   4   8   2   -0.03    0.25
   5  -8   2    1.60    0.55
  -5  -8  -2    2.26    0.47
   5  -8   2    2.16    0.57
   5   8   2    2.29    0.77
   5   8   2    1.94    0.36
   6  -8   2    0.73    0.51
  -6  -8  -2    0.99    0.42
   6  -8   2    0.98    0.55
   6   8   2    0.62    0.66
   6   8   2    0.42    0.32
  -7  -8  -2    6.15    0.71
   7  -8   2    4.77    0.81
   7   8   2    3.70    1.02
  -7   8  -2    2.76    0.68
   8   8   2    4.18    1.08
  -8   8  -2    4.69    0.90
   9   8   2   -1.92    0.80
  -9   8  -2    0.12    0.58
  10  -9  -2    3.11    0.80
  10   9  -2    1.15    0.72
  -9  -9   2    6.37    1.01
   9  -9  -2    2.16    0.73
   9   9  -2    4.33    0.72
   8  -9  -2    9.79    0.96
  -8  -9   2    9.87    1.17
   8   9  -2    9.26    0.92
  -7  -9   2    5.09    0.91
   7  -9  -2    4.49    0.74
   7   9  -2    5.16    0.67
   6  -9  -2   12.12    0.95
  -6  -9   2   13.01    1.24
   6   9  -2   12.41    0.83
   6   9  -2   12.13    0.65
  -5  -9   2    3.17    0.74
   5  -9  -2    3.40    0.56
   5  -9  -2    3.63    0.41
   5   9  -2    3.17    0.36
   5   9  -2    2.36    0.44
   4  -9  -2    3.01    0.50
  -4  -9   2    1.86    0.60
   4  -9  -2    1.96    0.24
   4   9  -2    2.36    0.25
   4   9  -2    2.13    0.35
   3  -9  -2    5.31    0.21
   3  -9  -2    6.47    0.57
  -3  -9   2    3.99    0.67
   3   9  -2    5.19    0.26
  -3   9   2    6.02    0.40
   3   9  -2    4.55    0.45
   2  -9  -2   14.64    0.66
   2  -9  -2   14.92    0.42
  -2  -9   2   15.10    1.00
   2   9  -2   14.48    0.58
   2   9  -2   14.85    0.33
   1  -9  -2   65.26    1.44
  -1  -9   2   65.67    1.87
   1  -9  -2   63.68    1.31
   1   9  -2   65.57    1.24
   1   9  -2   65.57    1.09
  -1   9   2   64.82    1.28
   0  -9   2   65.75    1.79
   0  -9  -2   71.20    1.34
   0   9  -2   69.03    1.23
   0   9  -2   70.14    1.29
   0   9   2   69.02    1.30
   0   9   2   68.22    1.63
  -1  -9  -2    1.61    0.31
   1  -9   2    1.74    0.30
   1  -9   2    1.96    0.45
   1   9   2    1.64    0.27
  -1   9  -2    2.72    0.26
   1   9   2    2.16    0.44
   2  -9   2    3.11    0.42
  -2  -9  -2    4.06    0.43
   2  -9   2    2.80    0.47
   2   9   2    3.69    0.36
   2   9   2    3.26    0.60
  -2   9  -2    3.47    0.36
  -3  -9  -2    9.06    0.58
   3  -9   2   10.63    0.74
   3  -9   2    9.90    0.68
   3   9   2    9.62    0.51
   3   9   2   10.27    0.96
  -3   9  -2   10.05    0.51
   4  -9   2    1.88    0.47
  -4  -9  -2    2.30    0.40
   4  -9   2    2.15    0.49
   4   9   2    2.45    0.69
   4   9   2    1.80    0.33
  -5  -9  -2    0.92    0.38
   5  -9   2    1.04    0.54
   5  -9   2    1.26    0.47
   5   9   2    1.15    0.33
   5   9   2    0.89    0.63
  -6  -9  -2    1.74    0.45
   6  -9   2    1.72    0.60
   6  -9   2    1.79    0.55
   6   9   2    0.62    0.67
   6   9   2    1.42    0.38
  -7  -9  -2    0.90    0.42
   7  -9   2    0.62    0.53
   7   9   2    0.27    0.72
  -7   9  -2    0.24    0.52
  -8   9  -2    2.93    0.80
   8   9   2    2.32    0.98
  -9   9  -2    2.76    0.81
  10 -10  -2   -0.40    0.54
  10  10  -2   -0.18    0.59
   9 -10  -2    0.57    0.63
  -9 -10   2    1.87    0.76
   9  10  -2    0.82    0.57
  -8 -10   2    5.93    0.97
   8 -10  -2    5.82    0.88
   8  10  -2    5.33    0.73
  -7 -10   2    4.31    0.82
   7 -10  -2    4.38    0.68
   7  10  -2    4.76    0.66
  -6 -10   2    1.11    0.71
   6 -10  -2    1.26    0.50
   6  10  -2    0.95    0.37
   6  10  -2    1.57    0.32
   5 -10  -2   10.00    0.52
   5 -10  -2    9.93    0.78
  -5 -10   2    9.70    1.11
   5  10  -2   12.11    0.77
   5  10  -2   10.38    0.51
  -4 -10   2    7.82    0.92
   4 -10  -2    8.65    0.65
   4 -10  -2    8.70    0.37
   4  10  -2    9.44    0.38
   4  10  -2    9.44    0.62
   3 -10  -2   28.09    0.95
   3 -10  -2   27.33    0.60
  -3 -10   2   25.93    1.25
   3  10  -2   28.12    0.90
   3  10  -2   28.63    0.52
   2 -10  -2   85.77    1.65
   2 -10  -2   84.44    1.71
  -2 -10   2   85.56    2.27
   2  10  -2   86.83    1.62
   1 -10  -2    6.52    0.53
  -1 -10   2    4.83    0.68
   1 -10  -2    3.99    0.45
  -1  10   2    5.06    0.44
   1  10  -2    4.44    0.25
   1  10  -2    4.34    0.37
   0 -10  -2  108.26    1.85
   0 -10   2  102.83    2.51
   0  10   2  109.82    2.36
   0  10  -2  111.50    1.83
   0  10  -2  106.48    1.77
   0  10   2  106.17    1.84
   1 -10   2    5.62    0.44
  -1 -10  -2    4.78    0.47
   1 -10   2    6.81    0.66
   1  10   2    4.56    0.61
   1  10   2    5.05    0.41
  -1  10  -2    5.68    0.37
   2 -10   2   44.32    1.20
  -2 -10  -2   42.40    1.03
   2 -10   2   42.82    1.38
   2  10   2   42.90    1.54
  -2  10  -2   43.26    0.93
   2  10   2   42.74    1.01
  -3 -10  -2   62.43    1.37
   3 -10   2   62.66    1.61
   3 -10   2   60.51    1.84
  -3  10  -2   60.65    1.23
   3  10   2   62.08    1.34
   3  10   2   63.97    2.08
   4 -10   2   -0.20    0.37
   4 -10   2    0.39    0.43
  -4 -10  -2    0.13    0.32
   4  10   2    0.06    0.26
  -4  10  -2    0.07    0.29
   4  10   2    0.01    0.55
   5 -10   2    1.30    0.51
   5 -10   2    1.45    0.55
  -5 -10  -2    1.36    0.40
   5  10   2    1.61    0.36
   5  10   2    1.25    0.69
   6 -10   2   -0.30    0.43
   6 -10   2    0.23    0.44
  -6 -10  -2   -0.05    0.33
   6  10   2   -0.23    0.64
   6  10   2    0.05    0.31
   7 -10   2    2.16    0.64
  -7  10  -2    2.05    0.65
   7  10   2    2.41    0.94
  -8  10  -2    2.77    0.79
   8  10   2    2.35    1.00
  -9  10  -2    0.31    0.58
  10 -11  -2   -0.11    0.61
  10  11  -2   -0.99    0.56
  -9 -11   2    1.98    0.79
   9 -11  -2    0.09    0.63
   9  11  -2   -0.31    0.47
  -8 -11   2    5.88    1.00
   8 -11  -2    5.05    0.83
   8  11  -2    6.03    0.77
   7 -11  -2   16.18    1.07
  -7 -11   2   15.25    1.35
   7  11  -2   16.38    1.02
   6 -11  -2    3.02    0.59
  -6 -11   2    3.08    0.83
   6  11  -2    1.86    0.43
   5 -11  -2    3.10    0.60
   5 -11  -2    2.72    0.36
  -5 -11   2    2.51    0.79
   5  11  -2    2.31    0.46
   5  11  -2    2.79    0.30
  -4 -11   2    6.20    0.84
   4 -11  -2    7.44    0.69
   4 -11  -2    7.69    0.34
   4  11  -2    8.42    0.58
   4  11  -2    7.72    0.32
   3 -11  -2   52.93    1.05
   3 -11  -2   52.80    1.34
  -3 -11   2   51.07    1.79
   3  11  -2   53.36    1.25
  -2 -11   2   10.86    0.99
   2 -11  -2   11.48    0.60
   2 -11  -2   12.05    0.49
   2  11  -2   11.89    0.59
  -1 -11   2    7.21    0.87
   1 -11  -2    7.56    0.55
   1 -11  -2    6.70    0.50
  -1  11   2    7.97    0.54
   1  11  -2    6.73    0.29
   1  11  -2    7.11    0.46
   0 -11   2    7.26    0.87
   0 -11  -2    6.40    0.49
   0  11   2    6.97    0.54
   0  11   2    5.83    0.46
   0  11  -2    5.77    0.40
   1 -11   2   83.87    1.66
  -1 -11  -2   81.57    1.53
   1 -11   2   83.37    2.13
  -1  11  -2   81.68    1.46
   1  11   2   82.27    2.10
   1  11   2   82.11    1.56
  -2 -11  -2    2.94    0.36
   2 -11   2    3.74    0.47
   2 -11   2    2.99    0.49
   2  11   2    3.36    0.60
  -2  11  -2    3.17    0.31
   2  11   2    3.28    0.34
  -3 -11  -2    3.22    0.39
   3 -11   2    3.27    0.55
   3 -11   2    2.79    0.46
   3  11   2    3.94    0.74
  -3  11  -2    3.03    0.34
   3  11   2    3.35    0.36
  -4 -11  -2    2.86    0.44
   4 -11   2    2.70    0.53
   4 -11   2    2.92    0.60
   4  11   2    3.82    0.78
   4  11   2    2.26    0.37
  -4  11  -2    2.33    0.38
   5 -11   2    1.16    0.52
  -5 -11  -2    1.36    0.39
   5 -11   2    0.87    0.47
   5  11   2    1.00    0.68
   5  11   2    1.33    0.35
  -5  11  -2    0.98    0.36
   6 -11   2    1.71    0.58
  -6 -11  -2    2.59    0.48
   6 -11   2    1.80    0.55
   6  11   2    1.19    0.38
   6  11   2    0.45    0.70
   7 -11   2    0.22    0.51
   7  11   2   -0.30    0.77
  -7  11  -2    0.44    0.64
  -8  11  -2    0.26    0.55
   8  11   2   -1.55    0.89
  -9  11  -2    1.35    0.69
  10 -12  -2    0.16    0.59
  10  12  -2   -0.36    0.60
   9 -12  -2    1.17    0.62
  -9 -12   2    2.79    0.89
   9  12  -2    1.43    0.61
   8 -12  -2    1.61    0.62
  -8 -12   2    2.05    0.81
   8  12  -2    1.06    0.52
  -7 -12   2    0.72    0.71
   7 -12  -2    0.04    0.53
   7  12  -2    1.02    0.46
  -6 -12   2    0.78    0.64
   6 -12  -2    1.78    0.54
   6  12  -2    1.65    0.47
   5 -12  -2    0.36    0.33
   5 -12  -2   -0.13    0.44
  -5 -12   2    0.02    0.17
  -5 -12   2   -0.16    0.60
   5  12  -2   -0.14    0.35
  -4 -12   2   11.02    0.32
  -4 -12   2    9.11    0.98
   4 -12  -2   11.02    0.74
   4 -12  -2   11.02    0.41
   4  12  -2   10.83    0.68
  -3 -12   2   -0.27    0.54
   3 -12  -2    0.14    0.13
   3 -12  -2    0.71    0.39
   3  12  -2    0.21    0.28
   2 -12  -2    1.98    0.30
  -2 -12   2    2.33    0.65
   2 -12  -2    2.03    0.37
  -2  12   2    2.23    0.39
   2  12  -2    2.19    0.35
   1 -12  -2    3.06    0.40
  -1 -12   2    2.57    0.67
   1 -12  -2    3.68    0.42
   1  12  -2    3.01    0.24
   1  12  -2    2.75    0.33
  -1  12   2    2.78    0.40
   0 -12   2    2.78    0.31
   0 -12  -2    2.14    0.46
   0 -12   2    3.57    0.66
   0 -12  -2    3.13    0.40
   0  12  -2    2.67    0.32
   0  12   2    3.23    0.39
   1 -12   2    0.98    0.30
  -1 -12  -2    0.98    0.29
   1 -12   2    1.27    0.48
   1  12   2    0.85    0.27
  -1  12  -2    0.99    0.24
   1  12   2    1.31    0.44
  -2 -12  -2   18.81    0.71
   2 -12   2   19.77    1.00
   2 -12   2   20.60    0.86
   2  12   2   20.10    0.72
   2  12   2   20.75    1.11
  -2  12  -2   20.55    0.66
   3 -12   2   20.19    1.05
   3 -12   2   19.44    0.91
  -3 -12  -2   19.55    0.74
   3  12   2   20.98    1.24
   3  12   2   19.92    0.74
  -3  12  -2   20.84    0.73
   4 -12   2   32.56    1.41
  -4 -12  -2   31.21    1.02
   4 -12   2   33.40    1.35
   4  12   2   30.25    1.61
   4  12   2   32.59    1.02
  -4  12  -2   32.82    0.97
   5 -12   2    1.62    0.53
  -5 -12  -2    1.50    0.40
   5 -12   2    1.50    0.49
   5  12   2    1.39    0.36
   5  12   2    1.57    0.74
  -5  12  -2    1.50    0.37
  -6 -12  -2    0.59    0.39
   6 -12   2   -0.09    0.53
   6 -12   2    0.37    0.46
   6  12   2    0.20    0.75
   6  12   2   -0.26    0.30
   7 -12   2    1.67    0.63
   7  12   2    0.37    0.95
  -7  12  -2    0.42    0.63
   8  12   2   -0.95    0.99
  -8  12  -2    0.01    0.63
  -9  12  -2    1.39    0.71
 -10 -13   2    2.79    1.02
  10 -13  -2    1.16    0.74
  10  13  -2    1.15    0.64
  -9 -13   2    1.33    0.77
   9 -13  -2    0.16    0.62
   9  13  -2    1.06    0.57
   8 -13  -2    1.26    0.67
  -8 -13   2    3.45    0.89
   8  13  -2    1.72    0.57
  -7 -13   2    2.47    0.76
   7 -13  -2    2.52    0.70
   7  13  -2    1.39    0.48
  -6 -13   2   -0.51    0.58
   6 -13  -2    0.52    0.47
   6  13  -2    0.35    0.40
  -5 -13   2   -0.07    0.61
   5 -13  -2    1.33    0.47
   5  13  -2    0.45    0.38
  -4 -13   2   44.11    1.79
   4 -13  -2   44.91    1.01
   4 -13  -2   47.00    1.42
   4  13  -2   45.22    1.28
   3 -13  -2    4.11    0.53
   3 -13  -2    4.06    0.29
  -3 -13   2    3.47    0.73
   3  13  -2    3.77    0.42
   2 -13  -2    6.96    0.50
   2 -13  -2    6.59    0.54
  -2 -13   2    6.76    0.90
  -2  13   2    6.73    0.61
   2  13  -2    6.83    0.48
   1 -13  -2    2.51    0.38
   1 -13  -2    1.76    0.38
  -1 -13   2    1.83    0.64
   1  13  -2    1.83    0.19
  -1  13   2    1.34    0.33
   1  13  -2    2.01    0.29
   0 -13   2    1.68    0.65
   0 -13  -2    1.41    0.34
   0 -13   2    1.53    0.27
   0  13   2    1.92    0.33
   0  13  -2    1.57    0.27
  -1 -13  -2   70.35    1.39
   1 -13   2   70.72    1.98
   1 -13   2   69.49    1.49
   1  13   2   70.10    1.93
  -1  13  -2   68.89    1.37
   1  13   2   74.24    1.50
  -2 -13  -2   12.65    0.59
   2 -13   2   10.58    0.69
   2 -13   2   12.02    0.85
   2  13   2   12.05    0.61
   2  13   2   12.68    0.95
  -2  13  -2   12.20    0.57
  -3 -13  -2   33.26    0.96
   3 -13   2   34.28    1.22
   3 -13   2   34.20    1.37
   3  13   2   32.36    1.55
  -3  13  -2   32.76    0.93
   3  13   2   32.82    0.98
  -4 -13  -2   23.43    0.87
   4 -13   2   21.30    1.14
   4 -13   2   23.40    1.11
   4  13   2   23.62    0.91
   4  13   2   23.39    1.50
  -4  13  -2   22.53    0.83
   5 -13   2    8.24    0.83
  -5 -13  -2    8.66    0.65
   5 -13   2    8.30    0.89
  -5  13  -2    8.65    0.66
   5  13   2    7.31    1.05
   5  13   2    8.48    0.62
   6 -13   2    0.71    0.46
   6 -13   2    1.25    0.55
   6  13   2    1.22    0.82
   6  13   2    1.09    0.39
   7 -13   2    1.43    0.92
   7  13   2    0.78    1.02
  -7  13  -2    1.39    0.68
  -8 -13  -2    3.86    1.06
  -8  13  -2    1.63    0.72
  -9  13  -2    1.27    0.64
  10 -14  -2    0.95    0.70
 -10 -14   2    1.79    0.86
  10  14  -2    0.39    0.61
   9 -14  -2    0.95    0.68
  -9 -14   2    1.18    0.85
   9  14  -2    0.30    0.54
   8 -14  -2    4.80    0.88
  -8 -14   2    4.43    1.00
   8  14  -2    5.39    0.77
   7 -14  -2    0.17    0.55
  -7 -14   2    0.51    0.74
   7  14  -2    0.47    0.44
  -6 -14   2    0.14    0.61
   6 -14  -2    0.40    0.50
   6  14  -2    0.09    0.38
   5 -14  -2    0.37    0.49
  -5 -14   2    0.29    0.65
   5  14  -2   -0.23    0.35
   4 -14  -2    0.77    0.45
  -4 -14   2    0.06    0.62
   4 -14  -2    0.15    0.15
   4  14  -2    0.05    0.33
   3 -14  -2   28.70    1.02
   3 -14  -2   27.80    0.75
  -3 -14   2   28.51    1.53
   3  14  -2   28.13    0.96
   2 -14  -2   12.92    0.69
  -2 -14   2   11.54    1.13
   2 -14  -2   13.14    0.63
  -2  14   2   12.51    0.73
   2  14  -2   12.57    0.62
   1 -14  -2    9.11    0.62
   1 -14  -2    8.44    0.56
  -1 -14   2    9.36    0.95
   1  14  -2    8.66    0.33
   1  14  -2    7.68    0.53
  -1  14   2    9.66    0.62
   0 -14   2    8.87    0.99
   0 -14   2    8.03    0.43
   0 -14  -2    9.36    0.52
   0 -14  -2    7.56    0.68
   0  14  -2    7.77    0.51
   0  14   2    8.58    0.57
   1 -14   2    0.07    0.26
  -1 -14  -2    0.08    0.28
   1 -14   2    1.05    0.48
   1  14   2    0.29    0.25
  -1  14  -2    0.47    0.24
   1  14   2    0.27    0.40
  -2 -14  -2    4.42    0.46
   2 -14   2    4.10    0.47
   2 -14   2    5.04    0.64
   2  14   2    3.68    0.40
   2  14   2    4.30    0.68
  -2  14  -2    4.95    0.46
  -3 -14  -2    0.74    0.31
   3 -14   2    0.99    0.46
   3 -14   2    1.01    0.41
   3  14   2    0.75    0.30
   3  14   2    0.99    0.64
  -3  14  -2    0.95    0.32
  -4 -14  -2    7.31    0.60
   4 -14   2    7.25    0.79
   4 -14   2    7.59    0.81
  -4  14  -2    7.96    0.61
   4  14   2    7.54    0.58
   4  14   2    6.47    0.99
   5 -14   2    6.39    0.78
  -5 -14  -2    7.44    0.60
   5 -14   2    5.40    0.73
  -5  14  -2    6.46    0.57
   5  14   2    5.96    0.57
   5  14   2    6.93    1.13
   6 -14   2    0.47    0.54
   6 -14   2    0.12    0.43
   6  14   2   -0.52    0.83
   6  14   2    0.36    0.35
   7  14   2   -1.29    0.91
  -8 -14  -2    4.97    1.07
  -8  14  -2    2.08    0.80
  -9  14  -2    0.89    1.08
  10 -15  -2    1.72    0.71
 -10 -15   2    4.59    1.05
  10  15  -2    1.25    0.68
  -9 -15   2    1.02    0.83
   9 -15  -2    0.33    0.65
   9  15  -2   -0.30    0.50
  -8 -15   2    0.86    0.80
   8 -15  -2    0.13    0.63
   8  15  -2    0.52    0.48
  -7 -15   2    1.40    0.82
   7 -15  -2    1.29    0.63
   7  15  -2    2.01    0.54
  -6 -15   2    0.27    0.72
   6 -15  -2   -0.40    0.50
   6  15  -2    0.37    0.34
   5 -15  -2   -0.40    0.42
  -5 -15   2   -0.52    0.67
   5  15  -2    0.04    0.31
  -4 -15   2   75.02    2.47
   4 -15  -2   75.05    1.87
   4 -15  -2   71.65    1.52
   4  15  -2   75.63    1.78
   3 -15  -2    8.50    0.70
   3 -15  -2    7.49    0.43
  -3 -15   2    7.13    0.92
  -3  15   2    9.90    0.76
   3  15  -2    7.41    0.61
   2 -15  -2    2.64    0.41
  -2 -15   2    2.51    0.71
   2 -15  -2    3.08    0.45
  -2  15   2    2.98    0.45
   2  15  -2    2.09    0.33
   1 -15  -2   11.60    0.62
  -1 -15   2   11.43    1.03
   1 -15  -2   10.95    0.73
   1  15  -2   11.00    0.38
  -1  15   2   11.34    0.64
   1  15  -2   10.68    0.60
   0 -15  -2   62.35    1.30
   0 -15   2   60.07    1.91
   0 -15   2   61.00    1.24
   0 -15  -2   61.81    1.73
   0  15  -2   59.55    1.33
   0  15   2   64.57    1.45
   1 -15   2    1.25    0.56
  -1 -15  -2    1.66    0.51
  -1 -15  -2    1.56    0.32
   1 -15   2    1.43    0.32
  -1  15  -2    1.50    0.31
   1  15   2    1.24    0.32
   2 -15   2    0.86    0.36
   2 -15   2    0.98    0.49
  -2 -15  -2    1.29    0.32
   2  15   2    0.83    0.53
  -2  15  -2    0.88    0.28
   2  15   2    0.87    0.29
  -3 -15  -2    0.69    0.32
   3 -15   2    0.49    0.43
   3 -15   2    0.38    0.42
   3  15   2    0.60    0.30
  -3  15  -2    0.22    0.30
   3  15   2    0.47    0.59
   4 -15   2    0.05    0.41
   4 -15   2    0.37    0.42
  -4 -15  -2    0.06    0.31
  -4  15  -2    0.02    0.32
   4  15   2    0.39    0.65
   4  15   2    0.14    0.30
   5 -15   2   -0.06    0.48
   5 -15   2    0.09    0.40
   5  15   2   -0.55    0.65
  -5  15  -2   -0.10    0.32
   5  15   2    0.19    0.31
   6 -15   2    0.47    0.45
   6 -15   2    0.13    0.48
   6  15   2   -0.16    0.79
   6  15   2    0.52    0.36
  -7 -15  -2    2.13    0.78
  -8 -15  -2    3.91    1.04
  -8  15  -2    0.41    0.60
 -10 -16   2    3.34    0.97
  10 -16  -2    1.37    1.17
  10  16  -2    0.57    0.62
   9 -16  -2   -0.06    0.64
  -9 -16   2    1.97    0.83
   9  16  -2   -0.18    0.48
   8 -16  -2   -0.44    0.58
  -8 -16   2    0.84    0.87
   8  16  -2    0.86    0.50
  -7 -16   2    1.54    0.77
   7 -16  -2    0.11    0.51
   7  16  -2    0.33    0.43
   6 -16  -2    2.63    0.61
  -6 -16   2    2.93    0.94
   6  16  -2    1.82    0.48
  -5 -16   2   -0.23    0.67
   5 -16  -2    0.12    0.50
   5  16  -2    0.13    0.33
   4 -16  -2    7.22    0.71
   4 -16  -2    6.18    0.45
  -4 -16   2    6.52    0.98
   4  16  -2    6.03    0.60
   3 -16  -2    8.72    0.73
   3 -16  -2    8.98    0.49
  -3 -16   2    7.44    1.03
   3  16  -2    9.18    0.65
  -3  16   2    8.76    0.76
  -2 -16   2    1.04    0.65
   2 -16  -2    0.44    0.35
   2 -16  -2    0.42    0.35
   2  16  -2    0.56    0.30
  -2  16   2    0.79    0.35
  -1 -16   2    3.53    0.80
   1 -16  -2    3.21    0.48
   1 -16  -2    2.93    0.40
   1  16  -2    3.53    0.40
  -1  16   2    2.21    0.38
   1  16  -2    2.64    0.24
   0 -16   2   16.66    0.61
   0 -16  -2   18.11    0.95
   0 -16  -2   18.03    0.69
   0 -16   2   16.85    1.12
   0  16   2   19.35    0.80
   0  16  -2   17.66    0.71
  -1 -16  -2    6.68    0.79
  -1 -16  -2    7.15    0.49
   1 -16   2    7.80    0.53
   1 -16   2    6.89    0.79
  -1  16  -2    5.55    0.51
   1  16   2    6.89    0.54
   2 -16   2    0.07    0.46
  -2 -16  -2   -0.13    0.27
   2 -16   2    0.07    0.32
  -2  16  -2    0.27    0.29
   2  16   2   -0.19    0.25
   2  16   2    0.41    0.51
   3 -16   2   71.90    1.87
  -3 -16  -2   70.61    1.46
   3 -16   2   68.83    2.11
   3  16   2   71.77    2.41
  -3  16  -2   71.35    1.55
   3  16   2   69.07    1.62
   4 -16   2    0.42    0.43
  -4 -16  -2    0.56    0.33
   4 -16   2   -0.20    0.39
   4  16   2    0.51    0.31
  -4  16  -2    0.14    0.32
   4  16   2    0.42    0.69
   5 -16   2    0.50    0.43
   5 -16   2    0.81    0.53
   5  16   2    0.89    0.37
   5  16   2    0.55    0.77
  -5  16  -2    0.40    0.37
   6 -16   2   -0.25    0.45
   6 -16   2    0.21    0.43
   6  16   2   -0.30    0.90
   6  16   2    0.33    0.34
   7 -16   2    1.28    0.64
  -7 -16  -2    3.57    0.93
  -8 -16  -2    7.94    1.33
  -8  16  -2    5.68    1.03
  -9 -17   2    2.19    1.00
   9 -17  -2    1.35    0.72
   9  17  -2    0.51    0.53
   8 -17  -2    0.29    0.65
  -8 -17   2    0.94    0.81
   8  17  -2    0.47    0.51
   7 -17  -2    0.28    0.52
  -7 -17   2    0.56    0.74
   7  17  -2   -0.13    0.44
  -6 -17   2    0.78    0.75
   6 -17  -2    1.06    0.58
   6  17  -2    0.39    0.38
   5 -17  -2    1.36    0.52
  -5 -17   2    1.24    0.78
   5  17  -2    0.95    0.38
   4 -17  -2    0.77    0.43
  -4 -17   2    1.25    0.85
   4  17  -2    0.29    0.36
  -4  17   2    0.49    0.43
   3 -17  -2   55.61    1.53
  -3 -17   2   56.11    2.17
   3 -17  -2   57.28    1.37
   3  17  -2   55.32    1.45
  -3  17   2   60.58    1.57
   2 -17  -2   13.19    0.74
   2 -17  -2   13.19    0.72
  -2 -17   2   12.00    1.14
  -2  17   2   12.64    0.74
   2  17  -2   12.59    0.71
   1 -17  -2   27.18    0.89
   1 -17  -2   27.54    1.07
  -1 -17   2   26.25    1.39
   1  17  -2   27.30    0.63
   1  17  -2   27.34    0.92
  -1  17   2   26.69    0.97
   0 -17  -2   -0.12    0.39
   0 -17  -2   -0.22    0.26
   0 -17   2    0.08    0.54
   0 -17   2    0.05    0.20
   0  17  -2    0.05    0.25
   0  17   2    0.56    0.31
  -1 -17  -2   -0.05    0.28
   1 -17   2    0.07    0.26
   1 -17   2    0.26    0.55
  -1 -17  -2    0.29    0.42
  -1  17  -2    0.49    0.27
   1  17   2    0.05    0.24
   2 -17   2    0.65    0.52
  -2 -17  -2    0.46    0.29
  -2 -17  -2    0.29    0.49
   2 -17   2    0.66    0.35
  -2  17  -2    0.54    0.30
   2  17   2    0.51    0.29
  -3 -17  -2   -0.02    0.30
   3 -17   2    0.26    0.40
   3 -17   2    0.39    0.47
  -3  17  -2    0.25    0.32
   3  17   2    0.26    0.30
   3  17   2    0.92    0.65
   4 -17   2    2.01    0.52
   4 -17   2    2.24    0.56
   4  17   2    2.41    0.44
   4  17   2    2.82    0.83
  -4  17  -2    1.76    0.40
   5 -17   2   -0.36    0.37
   5 -17   2   -0.27    0.49
  -5  17  -2   -0.18    0.33
   5  17   2    0.07    0.29
   5  17   2   -0.04    0.74
  -6 -17  -2    0.39    0.65
   6 -17   2    0.03    0.43
   6 -17   2   -0.30    0.52
   6  17   2   -0.22    0.32
  -7 -17  -2    3.82    1.02
   7 -17   2    1.67    0.74
  -8 -17  -2   11.80    1.62
  -9 -18   2    1.96    0.93
   9 -18  -2   -0.08    0.65
   9  18  -2    0.74    0.57
  -8 -18   2    3.30    1.07
   8 -18  -2    0.92    0.63
   8  18  -2    2.44    0.66
   7 -18  -2    0.94    0.64
  -7 -18   2    1.51    0.92
   7  18  -2    1.79    0.55
  -6 -18   2    1.06    0.78
   6 -18  -2    1.82    0.59
   6  18  -2    0.62    0.44
  -5 -18   2   -0.43    0.76
   5 -18  -2   -0.29    0.41
   5  18  -2    0.17    0.37
  -5  18   2   -0.52    0.43
  -4 -18   2   -0.03    0.81
   4 -18  -2    1.23    0.52
  -4  18   2    0.74    0.43
   4  18  -2    0.81    0.39
  -3 -18   2   20.48    1.46
   3 -18  -2   22.54    0.95
   3 -18  -2   21.49    0.79
   3  18  -2   22.02    0.95
  -3  18   2   22.75    0.99
  -2 -18   2    9.10    1.23
   2 -18  -2    9.63    0.72
   2 -18  -2    8.65    0.67
  -2  18   2    9.17    0.75
   2  18  -2    8.99    0.64
   1 -18  -2   13.44    0.83
   1 -18  -2   13.94    0.68
  -1 -18   2   13.93    1.15
   1  18  -2   13.28    0.43
  -1  18   2   13.88    0.77
   1  18  -2   13.17    0.70
   0 -18   2    5.87    0.82
   0 -18  -2    4.98    0.49
   0 -18   2    5.31    0.40
   0 -18  -2    5.59    0.75
   0  18   2    5.39    0.52
   0  18  -2    4.27    0.44
  -1 -18  -2    0.71    0.30
   1 -18   2    1.19    0.63
  -1 -18  -2    0.92    0.55
   1 -18   2    0.82    0.32
  -1  18  -2    0.68    0.30
   1  18   2    0.65    0.32
  -2 -18  -2    1.64    0.32
   2 -18   2    1.43    0.41
  -2 -18  -2    1.02    0.61
   2 -18   2    1.04    0.53
  -2  18  -2    0.89    0.35
   2  18   2    0.48    0.32
   3 -18   2    3.30    0.58
   3 -18   2    3.21    0.64
  -3 -18  -2    3.21    0.39
  -3 -18  -2    2.72    0.77
   3  18   2    3.16    0.48
  -3  18  -2    2.82    0.44
  -4 -18  -2    2.81    0.76
   4 -18   2    3.42    0.65
   4 -18   2    4.05    0.63
   4  18   2    3.35    0.47
  -4  18  -2    3.48    0.50
   5 -18   2    9.20    0.96
   5 -18   2    9.22    0.90
  -5 -18  -2    9.16    1.27
   5  18   2    9.01    0.73
  -5  18  -2    8.34    0.80
  -6 -18  -2    1.15    0.83
   6 -18   2    0.02    0.54
   6  18   2    0.34    0.36
  -7 -18  -2    2.17    0.95
   7 -18   2    1.17    0.69
  -8  18  -2    4.51    0.95
   9 -19  -2   -0.01    0.68
  -9 -19   2    1.48    0.98
   9  19  -2    1.31    0.59
   8 -19  -2   -0.30    0.60
  -8 -19   2    1.21    0.88
   8  19  -2   -0.22    0.46
  -8  19   2   -0.51    0.54
  -7 -19   2    2.70    0.93
   7 -19  -2    1.29    0.61
   7  19  -2    1.29    0.50
  -7  19   2    1.21    0.59
  -6 -19   2    2.22    0.88
   6 -19  -2    1.53    0.65
   6  19  -2    2.58    0.56
  -6  19   2    0.85    0.54
   5 -19  -2    1.81    0.61
  -5 -19   2    1.08    0.80
   5  19  -2    1.68    0.46
  -5  19   2    1.44    0.53
   4 -19  -2    2.34    0.58
  -4 -19   2    1.38    0.82
  -4  19   2    2.10    0.55
   4  19  -2    1.62    0.44
   3 -19  -2   -0.07    0.31
   3 -19  -2    0.16    0.43
  -3 -19   2    0.16    0.74
   3  19  -2   -0.16    0.32
  -3  19   2    0.54    0.42
   2 -19  -2   21.51    0.92
   2 -19  -2   20.55    0.99
  -2 -19   2   20.77    1.42
   2  19  -2   21.46    0.92
  -2  19   2   22.69    1.02
   1 -19  -2    0.13    0.43
   1 -19  -2    0.28    0.33
  -1 -19   2    0.35    0.77
   1  19  -2    0.58    0.32
   1  19  -2    0.00    0.15
  -1  19   2    0.41    0.31
   0 -19  -2   48.36    1.66
   0 -19   2   46.99    1.09
   0 -19   2   44.65    1.78
   0 -19  -2   48.13    1.17
   0  19  -2   46.09    1.27
   0  19   2   46.40    1.30
   1 -19   2   51.42    1.82
   1 -19   2   50.08    1.28
  -1 -19  -2   51.68    1.89
  -1 -19  -2   50.74    1.17
  -1  19  -2   50.95    1.33
   1  19   2   49.98    1.39
  -2 -19  -2    1.10    0.31
   2 -19   2    1.44    0.41
   2 -19   2    1.60    0.59
  -2 -19  -2    0.51    0.56
  -2  19  -2    1.04    0.35
   2  19   2    1.44    0.37
  -3 -19  -2    0.74    0.37
   3 -19   2    0.47    0.43
   3 -19   2    0.10    0.45
  -3 -19  -2   -0.54    0.51
   3  19   2    0.51    0.34
  -3  19  -2    0.48    0.35
  -4 -19  -2    0.86    0.67
   4 -19   2    1.07    0.51
   4 -19   2    1.38    0.49
  -4  19  -2    0.59    0.38
   4  19   2    0.82    0.35
  -5 -19  -2    0.79    0.67
   5 -19   2    0.88    0.54
   5 -19   2    0.31    0.54
  -5  19  -2   -0.11    0.63
   5  19   2    1.00    0.41
  -6 -19  -2   10.60    1.35
   6 -19   2    8.99    1.06
   6  19   2    8.26    0.79
  -7 -19  -2    1.85    0.87
   7 -19   2    1.39    0.72
  -8 -19  -2    3.79    0.99
  -8  19  -2   -0.53    0.58
  -9 -20   2    1.99    0.96
   9  20  -2    0.12    0.53
  -8 -20   2    3.17    1.09
   8 -20  -2    2.14    0.84
   8  20  -2    1.96    0.61
  -8  20   2    1.59    0.64
   7 -20  -2   -0.06    0.59
  -7 -20   2    1.39    0.87
   7  20  -2    0.05    0.46
  -7  20   2   -1.17    0.45
  -6 -20   2    0.13    0.88
   6 -20  -2    0.21    0.50
   6  20  -2    0.45    0.42
  -6  20   2   -0.01    0.47
   5 -20  -2   12.64    1.03
  -5 -20   2   12.47    1.40
  -5  20   2   11.23    0.97
   5  20  -2   12.21    0.90
   4 -20  -2    0.20    0.48
  -4 -20   2   -0.72    0.73
   4  20  -2    0.28    0.33
  -4  20   2    0.05    0.45
  -3 -20   2    0.50    0.88
   3 -20  -2    0.22    0.38
   3 -20  -2    0.52    0.34
   3  20  -2    0.56    0.38
  -3  20   2    0.91    0.42
  -2 -20   2   42.64    1.92
   2 -20  -2   46.09    1.34
   2 -20  -2   42.75    1.41
   2  20  -2   44.46    1.32
  -2  20   2   46.03    1.42
  -1 -20   2   27.08    1.65
   1 -20  -2   26.80    0.92
   1 -20  -2   26.15    1.22
  -1  20   2   26.29    1.07
   1  20  -2   27.51    1.02
   1  20  -2   27.25    0.66
   0 -20   2    3.96    0.40
   0 -20   2    3.69    0.81
   0 -20  -2    2.85    0.41
   0 -20  -2    3.99    0.74
   0  20  -2    2.84    0.42
   0  20   2    3.33    0.49
  -1 -20  -2   27.07    1.37
   1 -20   2   28.49    1.48
  -1 -20  -2   29.61    0.87
   1 -20   2   28.88    0.96
   1  20   2   28.52    1.08
  -1  20  -2   27.68    0.99
   2 -20   2    0.79    0.36
  -2 -20  -2    0.50    0.64
   2 -20   2    0.97    0.57
  -2 -20  -2    0.89    0.32
  -2  20  -2    1.46    0.38
   2  20   2    0.47    0.34
   3 -20   2    0.47    0.46
  -3 -20  -2   -0.11    0.55
   3 -20   2    0.06    0.41
   3  20   2    0.00    0.30
  -3  20  -2    0.46    0.36
   4 -20   2    0.68    0.44
   4 -20   2   -0.20    0.44
  -4 -20  -2   -0.20    0.58
  -4  20  -2   -0.58    0.33
   4  20   2    0.18    0.33
  -5 -20  -2   19.44    1.51
   5 -20   2   19.58    1.23
   5 -20   2   18.45    1.19
   5  20   2   20.29    0.99
  -6 -20  -2    4.63    1.06
   6 -20   2    4.94    0.85
   6  20   2    3.38    0.58
  -7 -20  -2    5.75    1.17
   7 -20   2    5.24    1.00
  -8  20  -2    0.75    0.71
   9 -21  -2    0.05    0.65
  -9 -21   2    2.41    1.06
   9  21  -2    0.43    0.53
  -8 -21   2    1.42    1.06
   8 -21  -2    1.66    0.72
   8  21  -2    1.68    0.60
  -8  21   2    0.45    0.58
  -7 -21   2    0.25    0.95
   7 -21  -2    0.08    0.54
   7  21  -2    0.04    0.43
  -7  21   2   -0.17    0.54
  -6 -21   2    4.46    1.16
   6 -21  -2    2.40    0.63
  -6  21   2    2.03    0.60
   6  21  -2    2.54    0.56
   5 -21  -2   23.12    1.27
  -5 -21   2   20.66    1.67
   5  21  -2   20.00    1.04
  -5  21   2   21.39    1.20
  -4 -21   2    0.28    0.82
   4 -21  -2    0.37    0.43
   4  21  -2    0.69    0.36
  -4  21   2    0.54    0.50
  -3 -21   2   -0.38    0.78
   3 -21  -2    0.06    0.43
   3 -21  -2   -0.09    0.35
  -3  21   2    0.22    0.44
   3  21  -2    0.69    0.38
   2 -21  -2    0.17    0.46
  -2 -21   2   -0.33    0.82
   2 -21  -2   -0.09    0.35
   2  21  -2    0.15    0.34
  -2  21   2   -0.30    0.37
   1 -21  -2    0.01    0.48
  -1 -21   2    0.05    0.73
   1 -21  -2    0.36    0.33
   1  21  -2    0.05    0.31
   1  21  -2    0.25    0.17
  -1  21   2    0.28    0.36
   0 -21  -2   13.58    0.67
   0 -21   2   13.81    0.58
   0 -21   2   12.76    1.32
   0 -21  -2   11.47    1.03
   0  21   2   15.20    0.84
   0  21  -2   14.04    0.76
  -1 -21  -2    0.81    0.65
  -1 -21  -2    1.27    0.33
   1 -21   2    1.16    0.34
   1 -21   2    1.08    0.63
   1  21   2    1.16    0.39
  -1  21  -2    1.41    0.37
  -2 -21  -2    8.96    1.05
  -2 -21  -2    8.78    0.54
   2 -21   2    9.90    1.00
   2 -21   2    9.34    0.72
  -2  21  -2    9.19    0.71
   2  21   2    9.68    0.71
   3 -21   2    5.73    0.80
   3 -21   2    6.08    0.69
  -3 -21  -2    4.95    0.88
   3  21   2    5.64    0.62
  -3  21  -2    6.14    0.62
  -4 -21  -2    4.28    0.90
   4 -21   2    5.62    0.78
   4 -21   2    5.66    0.78
   4  21   2    4.50    0.57
  -4  21  -2    5.37    0.63
  -5 -21  -2   18.46    1.61
   5 -21   2   17.27    1.19
   5 -21   2   17.88    1.23
   5  21   2   18.30    1.01
   6 -21   2    0.85    0.58
  -6 -21  -2    2.25    0.88
   6  21   2    1.30    0.45
   7 -21   2    0.20    0.65
  -7 -21  -2    1.19    0.82
  -8  21  -2    0.47    0.71
   9 -22  -2    0.19    0.72
  -9 -22   2    1.32    1.00
   9  22  -2    0.08    0.50
  -8 -22   2    0.77    0.91
   8 -22  -2   -0.28    0.68
   8  22  -2    0.69    0.51
  -8  22   2   -0.67    0.57
  -7 -22   2    0.69    1.00
   7 -22  -2    0.70    0.69
   7  22  -2    0.43    0.47
  -7  22   2    0.01    0.55
  -6 -22   2    0.27    0.87
   6 -22  -2    0.59    0.60
   6  22  -2   -0.01    0.43
  -6  22   2    0.19    0.53
   5 -22  -2    0.15    0.55
  -5 -22   2    0.65    0.86
   5  22  -2    0.56    0.39
  -5  22   2    1.32    0.54
   4 -22  -2   -0.10    0.46
  -4 -22   2   -0.27    0.94
  -4  22   2    0.47    0.47
   4  22  -2   -0.53    0.30
  -3 -22   2    5.56    1.07
   3 -22  -2    5.42    0.68
   3 -22  -2    4.95    0.63
  -3  22   2    5.87    0.68
   3  22  -2    4.83    0.57
   2 -22  -2    0.22    0.39
  -2 -22   2    0.24    0.81
   2 -22  -2   -0.04    0.48
   2  22  -2    0.00    0.34
  -2  22   2   -0.11    0.34
   1 -22  -2    1.56    0.60
   1 -22  -2    0.87    0.39
  -1 -22   2    1.81    0.86
  -1  22   2    1.18    0.41
   1  22  -2    0.99    0.39
   1  22  -2    1.67    0.22
   0 -22  -2    0.25    0.31
   0 -22   2    0.22    0.24
   0 -22   2    0.33    0.78
   0 -22  -2    0.35    0.57
   0  22  -2    0.19    0.34
   0  22   2   -0.02    0.33
   1 -22   2    0.40    0.69
  -1 -22  -2   -0.15    0.28
   1 -22   2    0.30    0.30
  -1 -22  -2    0.19    0.65
   1  22   2   -0.26    0.33
  -1  22  -2    0.04    0.32
   2 -22   2    9.64    1.03
   2 -22   2   10.78    0.74
  -2 -22  -2   10.32    1.12
  -2  22  -2    9.65    0.74
   2  22   2   10.52    0.75
  -3 -22  -2    8.15    1.08
   3 -22   2    7.93    0.78
   3 -22   2    7.50    0.89
   3  22   2    8.66    0.73
  -3  22  -2    8.00    0.70
   4 -22   2    0.54    0.49
  -4 -22  -2    0.29    0.71
   4 -22   2   -0.16    0.42
  -4  22  -2   -0.62    0.36
   4  22   2   -0.15    0.34
  -5 -22  -2    1.25    0.76
   5 -22   2    0.95    0.54
   5 -22   2    1.38    0.61
   5  22   2    0.47    0.40
   6 -22   2    4.50    0.84
  -6 -22  -2    5.28    1.09
   6  22   2    4.60    0.64
   7 -22   2    0.14    0.58
  -7 -22  -2    2.27    0.97
  -8 -22  -2    5.80    1.17
  -8  22  -2    2.82    0.96
  -9 -23   2    1.93    1.10
   9 -23  -2    0.32    0.75
   9  23  -2    1.07    0.61
   8 -23  -2    0.93    0.70
  -8 -23   2    2.87    1.19
   8  23  -2    0.72    0.54
  -8  23   2   -0.06    0.60
   7 -23  -2    0.31    0.64
  -7 -23   2    0.77    0.94
  -7  23   2   -0.25    0.55
   7  23  -2    0.57    0.50
   6 -23  -2    5.40    0.89
  -6 -23   2    6.21    1.24
  -6  23   2    4.55    0.73
   6  23  -2    5.41    0.74
  -5 -23   2    3.49    1.14
   5 -23  -2    4.27    0.75
   5  23  -2    2.88    0.54
  -5  23   2    2.84    0.60
  -4 -23   2    2.66    1.11
   4 -23  -2    1.76    0.58
   4  23  -2    2.77    0.54
  -4  23   2    2.18    0.53
   3 -23  -2    2.25    0.54
  -3 -23   2    2.37    1.03
  -3  23   2    2.47    0.57
   3  23  -2    2.65    0.51
   2 -23  -2    3.93    0.64
   2 -23  -2    3.84    0.55
  -2 -23   2    4.94    1.14
   2  23  -2    3.52    0.54
  -2  23   2    3.21    0.57
   1 -23  -2    5.92    0.62
  -1 -23   2    6.26    1.05
   1 -23  -2    6.62    0.82
   1  23  -2    5.55    0.59
  -1  23   2    5.20    0.63
   0 -23  -2    1.06    0.34
   0 -23   2    0.63    0.24
   0 -23   2    0.78    0.74
   0 -23  -2    0.57    0.57
   0  23   2    0.53    0.41
   0  23  -2    0.90    0.39
  -1 -23  -2    1.15    0.33
   1 -23   2    0.48    0.32
   1 -23   2    0.36    0.71
  -1 -23  -2    0.49    0.68
   1  23   2    0.79    0.36
  -1  23  -2    0.78    0.37
  -2 -23  -2    4.47    0.84
   2 -23   2    6.38    0.89
   2 -23   2    4.11    0.55
   2  23   2    5.21    0.62
  -2  23  -2    4.30    0.57
   3 -23   2   -0.12    0.47
   3 -23   2    0.26    0.43
  -3 -23  -2   -0.10    0.64
   3  23   2   -0.01    0.32
  -3  23  -2    0.77    0.39
   4 -23   2    2.18    0.63
   4 -23   2    2.13    0.63
  -4 -23  -2    2.93    0.88
   4  23   2    2.33    0.50
  -4  23  -2    2.38    0.52
  -5 -23  -2    4.74    1.02
   5 -23   2    4.24    0.81
   5  23   2    4.34    0.63
   6 -23   2   14.49    1.27
  -6 -23  -2   14.21    1.62
   6  23   2   14.22    0.99
  -7 -23  -2    3.31    1.06
  -9 -24   2    3.34    1.29
   9  24  -2    1.72    0.66
   8 -24  -2    0.80    0.78
  -8 -24   2    0.95    0.96
   8  24  -2   -0.12    0.48
   7 -24  -2    4.89    0.89
  -7 -24   2    6.32    1.39
  -7  24   2    4.69    0.81
   7  24  -2    5.15    0.78
   6 -24  -2    2.13    0.72
  -6 -24   2    1.84    1.02
  -6  24   2    1.10    0.59
   6  24  -2    1.82    0.57
  -5 -24   2    4.75    1.25
   5 -24  -2    4.57    0.78
  -5  24   2    2.67    0.62
   5  24  -2    4.06    0.65
  -4 -24   2    0.83    0.91
   4 -24  -2   -0.56    0.45
  -4  24   2    0.03    0.47
   4  24  -2    0.36    0.40
   3 -24  -2    0.91    0.46
  -3 -24   2    0.10    0.84
  -3  24   2    0.21    0.45
   3  24  -2    0.51    0.36
   2 -24  -2   25.96    1.24
   2 -24  -2   27.93    1.12
  -2 -24   2   26.53    1.74
   2  24  -2   27.71    1.15
  -2  24   2   28.48    1.23
   1 -24  -2    8.62    1.04
   1 -24  -2   11.10    0.73
  -1 -24   2   12.07    1.50
  -1  24   2    9.61    0.84
   1  24  -2   10.05    0.76
   0 -24   2   15.59    0.65
   0 -24   2   16.09    1.36
   0 -24  -2   17.82    1.23
   0 -24  -2   15.55    0.71
   0  24  -2   15.69    0.86
   0  24   2   14.73    0.89
   1 -24   2    0.41    0.32
  -1 -24  -2    0.22    0.29
   1 -24   2    0.31    0.70
  -1 -24  -2   -0.41    0.67
  -1  24  -2   -0.11    0.32
   1  24   2    0.25    0.34
  -2 -24  -2    0.87    0.67
   2 -24   2    1.45    0.67
   2 -24   2    0.78    0.38
   2  24   2    0.84    0.40
  -2  24  -2    1.18    0.42
  -3 -24  -2    2.62    0.80
   3 -24   2    1.66    0.63
   3 -24   2    1.78    0.50
   3  24   2    2.08    0.46
  -3  24  -2    1.72    0.47
   4 -24   2   10.30    0.91
   4 -24   2   11.68    1.09
  -4 -24  -2   11.69    1.34
  -4  24  -2   10.47    0.82
   4  24   2   11.63    0.84
  -5 -24  -2   16.90    1.57
   5 -24   2   17.47    1.17
   5  24   2   18.21    1.07
  -6 -24  -2   11.89    1.54
   6 -24   2   11.14    1.11
   6  24   2   12.02    0.96
  -7 -24  -2    1.77    0.83
  -8 -25   2    1.07    0.99
   8 -25  -2    0.51    0.73
  -8  25   2   -1.34    0.55
   8  25  -2    0.05    0.54
  -7 -25   2    0.84    1.13
   7 -25  -2    0.25    0.58
   7  25  -2    0.26    0.49
  -7  25   2   -0.48    0.56
  -6 -25   2   14.09    1.77
   6 -25  -2   13.15    1.19
   6  25  -2   12.12    1.02
  -6  25   2   13.61    1.17
  -5 -25   2    4.44    1.19
   5 -25  -2    3.78    0.71
   5  25  -2    3.43    0.65
  -5  25   2    2.96    0.67
  -4 -25   2   10.95    1.50
   4 -25  -2   10.44    0.95
   4  25  -2   10.25    0.85
  -4  25   2    7.80    0.83
   3 -25  -2    0.76    0.44
  -3 -25   2    0.85    0.91
   3  25  -2    0.78    0.41
  -3  25   2    0.30    0.41
  -2 -25   2    2.47    0.92
   2 -25  -2    2.29    0.51
   2 -25  -2    2.79    0.66
   2  25  -2    2.96    0.54
  -2  25   2    2.09    0.55
  -1 -25   2    0.78    0.91
   1 -25  -2    0.01    0.33
   1 -25  -2   -0.04    0.60
   1  25  -2    0.06    0.32
  -1  25   2    1.38    0.47
   0 -25   2    0.77    0.26
   0 -25  -2    0.64    0.34
   0 -25   2    1.46    0.90
   0 -25  -2    0.94    0.66
   0  25   2    0.92    0.45
   0  25  -2    1.12    0.40
   1 -25   2    4.05    0.84
   1 -25   2    4.72    0.51
  -1 -25  -2    4.41    0.88
  -1  25  -2    3.63    0.55
   1  25   2    4.39    0.60
   2 -25   2    0.91    0.39
  -2 -25  -2    0.83    0.64
   2 -25   2   -0.53    0.50
  -2  25  -2    0.33    0.39
   2  25   2   -0.18    0.36
   3 -25   2    0.07    0.54
  -3 -25  -2    1.01    0.69
   3 -25   2    0.65    0.44
  -3  25  -2    0.41    0.41
   3  25   2    0.15    0.33
   4 -25   2    2.07    0.64
  -4 -25  -2    2.71    0.87
   4 -25   2    2.99    0.67
   4  25   2    2.61    0.53
  -4  25  -2    1.80    0.51
  -5 -25  -2   11.07    1.42
   5 -25   2   10.72    1.06
   5  25   2   11.32    0.90
   6 -25   2    1.90    0.73
  -6 -25  -2    2.54    0.94
   6  25   2    2.22    0.56
  -7 -25  -2    2.12    0.92
  -7  25  -2    0.65    0.69
  -8 -26   2    3.23    1.28
   8 -26  -2    3.46    0.93
   8  26  -2    2.78    0.72
  -8  26   2    0.58    0.68
   7 -26  -2   -0.39    0.60
  -7 -26   2    1.60    1.09
  -7  26   2   -1.28    0.53
   7  26  -2    0.38    0.53
  -6 -26   2    1.50    1.21
   6 -26  -2    1.37    0.71
   6  26  -2    0.51    0.44
  -6  26   2   -0.30    0.55
  -5 -26   2    2.01    1.06
   5 -26  -2    2.03    0.69
  -5  26   2    0.82    0.56
   5  26  -2    1.52    0.52
  -4 -26   2    3.59    1.13
   4 -26  -2    3.31    0.67
   4  26  -2    3.13    0.58
  -4  26   2    2.14    0.58
  -3 -26   2    0.63    1.00
   3 -26  -2    0.03    0.41
  -3  26   2    0.07    0.46
   3  26  -2    0.66    0.42
  -2 -26   2    0.67    0.88
   2 -26  -2    0.45    0.59
   2 -26  -2    0.45    0.39
  -2  26   2    0.81    0.49
   2  26  -2    0.30    0.41
  -1 -26   2   -0.02    0.88
   1 -26  -2    0.21    0.59
   1 -26  -2    0.52    0.35
   1  26  -2    0.39    0.40
  -1  26   2    0.08    0.42
   0 -26  -2   16.69    0.77
   0 -26   2   18.72    1.56
   0 -26  -2   16.31    1.27
   0  26  -2   15.27    0.91
   0  26   2   18.54    1.04
   1 -26   2    2.13    0.81
  -1 -26  -2    3.06    0.81
   1 -26   2    3.10    0.44
   1  26   2    2.83    0.54
  -1  26  -2    2.77    0.51
   2 -26   2    6.98    0.69
  -2 -26  -2    6.61    1.03
   2 -26   2    7.59    1.04
   2  26   2    5.50    0.64
  -2  26  -2    6.35    0.68
   3 -26   2   -0.36    0.39
   3 -26   2    0.03    0.53
  -3 -26  -2    1.21    0.79
   3  26   2    0.44    0.39
  -3  26  -2   -0.72    0.36
   4 -26   2    2.15    0.63
  -4 -26  -2    2.40    0.96
   4 -26   2    1.97    0.65
   4  26   2    1.50    0.48
  -4  26  -2    2.87    0.58
   5 -26   2    8.75    1.01
  -5 -26  -2    8.19    1.27
   5  26   2    7.52    0.79
  -6 -26  -2    4.02    1.11
   6 -26   2    2.61    0.73
   6  26   2    1.92    0.54
  -7 -26  -2    3.19    0.93
  -7  26  -2    1.27    0.73
   8 -27  -2    2.05    0.80
  -8 -27   2    1.91    1.16
  -8  27   2    0.27    0.66
   8  27  -2    1.51    0.62
  -7 -27   2    1.26    1.15
   7 -27  -2   -0.23    0.65
   7  27  -2   -0.33    0.48
  -7  27   2   -0.42    0.57
   6 -27  -2   -0.15    0.58
  -6 -27   2    0.01    1.06
  -6  27   2   -0.81    0.50
   6  27  -2   -0.23    0.46
   5 -27  -2   13.32    1.14
  -5 -27   2   17.08    1.84
   5  27  -2   13.41    1.05
  -5  27   2   15.18    1.21
  -4 -27   2   -0.42    1.04
   4 -27  -2    0.18    0.48
   4  27  -2   -0.23    0.40
  -4  27   2    0.46    0.51
   3 -27  -2    2.55    0.59
  -3 -27   2    4.22    1.11
   3  27  -2    3.43    0.59
  -3  27   2    2.15    0.61
   2 -27  -2   -0.53    0.57
   2 -27  -2    0.24    0.39
  -2 -27   2    0.95    0.90
   2  27  -2    0.71    0.42
  -2  27   2    0.58    0.48
   1 -27  -2    0.20    0.35
  -1 -27   2   -0.19    0.75
   1 -27  -2   -0.01    0.58
   1  27  -2   -0.10    0.37
  -1  27   2    0.75    0.46
   0 -27   2    7.78    1.10
   0 -27  -2    7.70    1.05
   0 -27  -2    8.20    0.63
   0  27   2    8.72    0.78
   0  27  -2    7.76    0.75
   1 -27   2   21.96    1.53
  -1 -27  -2   22.11    1.51
   1 -27   2   22.08    0.88
  -1  27  -2   23.37    1.09
   1  27   2   20.43    1.10
  -2 -27  -2    6.24    1.03
   2 -27   2    7.00    0.67
   2 -27   2    6.34    0.96
   2  27   2    7.74    0.79
  -2  27  -2    7.78    0.76
   3 -27   2    0.71    0.57
  -3 -27  -2    0.73    0.77
   3 -27   2    1.47    0.50
   3  27   2    1.28    0.49
  -3  27  -2    1.19    0.48
   4 -27   2    3.98    0.72
  -4 -27  -2    5.19    1.06
  -4  27  -2    4.61    0.67
   4  27   2    4.95    0.68
   5 -27   2    9.26    0.96
  -5 -27  -2   11.70    1.49
   5  27   2    9.54    0.88
   6 -27   2    1.00    0.68
  -6 -27  -2    1.01    0.90
   6  27   2    0.47    0.48
  -7 -27  -2    4.33    1.14
  -7  27  -2    2.72    0.84
   8 -28  -2    0.03    0.72
  -8 -28   2    0.89    1.10
   8  28  -2    0.83    0.57
  -8  28   2   -0.46    0.63
   7 -28  -2    3.37    0.88
  -7 -28   2    5.01    1.51
  -7  28   2    2.33    0.75
   7  28  -2    1.44    0.60
  -6 -28   2    1.19    1.13
   6 -28  -2   -0.27    0.57
   6  28  -2    0.68    0.52
  -6  28   2   -0.67    0.59
   5 -28  -2   -0.04    0.52
  -5 -28   2    0.05    1.12
  -5  28   2   -0.47    0.54
   5  28  -2    0.58    0.44
  -4 -28   2   -0.55    0.94
   4 -28  -2    0.02    0.49
  -4  28   2   -0.21    0.54
   4  28  -2    0.33    0.42
  -3 -28   2    5.97    1.25
   3 -28  -2    6.49    0.77
  -3  28   2    4.37    0.67
   3  28  -2    6.91    0.77
  -2 -28   2    4.26    1.09
   2 -28  -2    6.39    0.69
   2  28  -2    3.59    0.56
  -2  28   2    3.94    0.63
   1 -28  -2    2.61    0.80
  -1 -28   2    3.50    0.98
   1 -28  -2    4.21    0.54
  -1  28   2    4.34    0.67
   1  28  -2    3.29    0.57
   0 -28  -2    7.54    1.02
   0 -28   2    7.35    1.08
   0  28   2    6.69    0.77
   0  28  -2    5.92    0.67
  -1 -28  -2   16.27    1.39
   1 -28   2   12.23    1.22
   1 -28   2   14.35    0.73
  -1  28  -2   15.91    0.97
   1  28   2   14.19    1.00
   2 -28   2    0.39    0.67
   2 -28   2    1.05    0.40
  -2 -28  -2    1.89    0.83
   2  28   2    0.81    0.46
  -2  28  -2    0.92    0.47
   3 -28   2   -0.44    0.54
  -3 -28  -2    0.76    0.75
   3 -28   2    0.17    0.41
   3  28   2    0.10    0.41
  -3  28  -2    0.18    0.45
   4 -28   2    2.82    0.66
  -4 -28  -2    5.13    1.12
  -4  28  -2    2.85    0.62
   4  28   2    3.17    0.61
  -5 -28  -2    3.58    1.01
   5 -28   2    2.36    0.69
   5  28   2    1.50    0.52
   6 -28   2    7.80    1.09
  -6 -28  -2    8.13    1.35
   6  28   2    7.58    0.85
  -7 -28  -2    5.51    1.34
  -7  28  -2    0.84    0.69
   8 -29  -2    1.22    1.26
   8  29  -2    1.44    0.62
  -8  29   2    0.96    1.16
  -7 -29   2    5.01    1.56
   7 -29  -2    2.96    0.83
  -7  29   2    1.88    0.75
   7  29  -2    2.32    0.63
   6 -29  -2   -0.79    0.54
  -6 -29   2    1.35    1.30
  -6  29   2   -0.22    0.60
   6  29  -2   -0.03    0.50
  -5 -29   2    1.19    1.27
   5 -29  -2    0.58    0.58
   5  29  -2   -0.07    0.46
  -5  29   2   -0.02    0.56
  -4 -29   2    0.20    1.01
   4 -29  -2    0.93    0.56
   4  29  -2    0.84    0.46
  -4  29   2    0.34    0.56
  -3 -29   2    7.01    1.41
   3 -29  -2    6.18    0.76
  -3  29   2    6.03    0.83
   3  29  -2    6.24    0.74
  -2 -29   2   -0.65    1.00
   2 -29  -2   -0.12    0.38
   2  29  -2    0.64    0.45
  -2  29   2    0.55    0.48
   1 -29  -2    0.95    0.39
  -1 -29   2    0.45    0.96
   1 -29  -2    1.61    0.76
   1  29  -2    0.97    0.48
  -1  29   2    1.43    0.55
   0 -29  -2   22.18    1.48
   0 -29   2   22.58    1.55
   0  29  -2   23.66    1.14
   0  29   2   23.59    1.16
  -1 -29  -2    1.49    0.73
   1 -29   2   -0.79    0.73
   1  29   2    0.54    0.44
  -1  29  -2    0.01    0.41
  -2 -29  -2    2.76    0.92
   2 -29   2    1.19    0.72
   2 -29   2    2.14    0.48
  -2  29  -2    1.57    0.51
   2  29   2    2.69    0.56
  -3 -29  -2    1.33    0.91
   3 -29   2    0.87    0.61
   3 -29   2    1.53    0.51
   3  29   2    1.25    0.49
  -3  29  -2    1.17    0.53
  -4 -29  -2   18.66    1.69
   4 -29   2   17.95    1.17
  -4  29  -2   18.68    1.18
   4  29   2   19.09    1.13
   5 -29   2    1.04    0.63
  -5 -29  -2    2.63    1.09
   5  29   2    1.26    0.51
  -6 -29  -2    3.96    1.15
   6 -29   2    1.67    0.68
   6  29   2    0.36    0.50
  -7 -30   2    2.29    1.26
   7 -30  -2    0.00    0.58
  -7  30   2   -0.04    0.61
   7  30  -2    0.09    0.49
   6 -30  -2   -0.72    0.56
  -6 -30   2    1.71    1.35
  -6  30   2    0.16    0.59
   6  30  -2    0.38    0.53
   5 -30  -2    0.12    0.53
  -5 -30   2    1.15    1.27
   5  30  -2   -0.04    0.47
  -5  30   2   -0.08    0.58
   4 -30  -2    4.91    0.79
  -4 -30   2    3.68    1.24
   4  30  -2    3.87    0.65
  -4  30   2    3.54    0.69
   3 -30  -2    6.82    0.78
  -3 -30   2    6.58    1.41
  -3  30   2    5.13    0.73
   3  30  -2    4.68    0.64
  -2 -30   2    1.35    1.01
   2 -30  -2    1.11    0.47
   2  30  -2    0.62    0.42
  -2  30   2    1.08    0.56
   1 -30  -2    2.33    0.80
  -1 -30   2    3.64    1.06
   1  30  -2    2.07    0.55
  -1  30   2    2.23    0.63
   0 -30   2    2.78    0.91
   0 -30  -2    3.51    0.86
   0  30  -2    3.69    0.65
   0  30   2    2.47    0.61
   1 -30   2   13.26    1.41
  -1 -30  -2   14.31    1.43
  -1  30  -2   12.64    0.96
   1  30   2   13.79    1.03
   2 -30   2    1.14    0.39
   2 -30   2   -0.26    0.67
  -2 -30  -2    0.53    0.78
  -2  30  -2   -0.15    0.45
   2  30   2    0.69    0.48
   3 -30   2    4.03    0.64
   3 -30   2    1.90    0.71
  -3 -30  -2    3.16    1.01
  -3  30  -2    3.20    0.65
   3  30   2    2.80    0.63
  -4 -30  -2    2.40    0.95
   4 -30   2    3.51    0.69
  -4  30  -2    3.24    0.67
   4  30   2    2.68    0.61
  -5 -30  -2    2.13    1.02
   5 -30   2    3.17    0.79
   5  30   2    2.79    0.63
  -6 -30  -2    1.77    0.92
   6  30   2    0.79    0.52
  -7 -31   2    1.87    1.28
   7 -31  -2    2.28    0.81
  -7  31   2    1.98    0.77
   7  31  -2    1.69    0.63
  -6 -31   2    4.97    1.60
   6 -31  -2    3.26    0.83
  -6  31   2    4.90    0.91
   6  31  -2    5.15    0.81
   5 -31  -2    1.72    0.69
  -5 -31   2    2.20    1.27
  -5  31   2    1.82    0.70
   5  31  -2    1.78    0.60
  -4 -31   2   10.08    1.70
   4 -31  -2    8.65    0.94
   4  31  -2    9.15    0.93
  -4  31   2    9.88    1.09
   3 -31  -2   14.07    0.99
  -3 -31   2   14.09    1.76
  -3  31   2   14.47    1.20
   3  31  -2   13.62    1.02
   2 -31  -2    1.05    0.45
  -2 -31   2    1.47    1.17
  -2  31   2    0.45    0.52
   2  31  -2    0.84    0.50
  -1 -31   2   -0.35    0.85
   1 -31  -2   -0.40    0.67
  -1  31   2    0.92    0.54
   1  31  -2    0.06    0.42
   0 -31  -2    2.43    0.86
   0 -31   2    1.40    0.88
   0  31  -2    3.09    0.62
   0  31   2    1.94    0.59
   1 -31   2    1.54    0.79
  -1 -31  -2    2.92    0.93
   1  31   2    1.46    0.49
  -1  31  -2    0.79    0.50
  -2 -31  -2    2.35    0.86
   2 -31   2    1.74    0.82
   2 -31   2    2.54    0.52
   2  31   2    2.29    0.61
  -2  31  -2    2.08    0.56
  -3 -31  -2    6.95    1.17
   3 -31   2    7.56    0.77
  -3  31  -2    5.14    0.74
   3  31   2    6.57    0.81
  -4 -31  -2    2.37    1.06
   4 -31   2    3.07    0.66
   4  31   2    2.83    0.63
  -4  31  -2    2.20    0.64
   5 -31   2    0.32    0.58
  -5 -31  -2    0.98    1.01
   5  31   2   -0.27    0.42
  -6 -31  -2    1.74    0.98
  -6  31  -2    1.01    0.66
   6  31   2    0.44    0.47
   7 -32  -2    0.18    0.68
  -7 -32   2   -0.08    1.19
  -7  32   2    0.38    0.68
   7  32  -2    0.24    0.55
  -6 -32   2    0.77    1.21
   6 -32  -2    0.55    0.65
   6  32  -2    0.70    0.56
  -6  32   2    0.32    0.66
   5 -32  -2   -0.46    0.53
  -5 -32   2    0.99    1.21
   5  32  -2    0.07    0.49
  -5  32   2    0.03    0.60
   4 -32  -2    1.47    0.62
  -4 -32   2    2.22    1.40
  -4  32   2    0.65    0.59
   4  32  -2    1.68    0.56
  -3 -32   2    1.30    1.11
   3 -32  -2    2.08    0.59
   3  32  -2    2.99    0.64
  -3  32   2    1.35    0.65
  -2 -32   2    4.04    1.23
   2 -32  -2    5.17    0.66
  -2  32   2    3.83    0.74
   2  32  -2    3.98    0.67
  -1 -32   2   -0.83    0.95
   1 -32  -2    0.52    0.73
  -1  32   2   -0.46    0.46
   1  32  -2    0.43    0.47
   0 -32  -2    8.51    1.14
   0 -32   2    6.72    1.18
   0  32  -2    6.13    0.76
   0  32   2    7.37    0.86
  -1 -32  -2    0.42    0.77
   1 -32   2   -1.05    0.75
  -1  32  -2    0.12    0.46
   1  32   2    0.07    0.47
  -2 -32  -2    1.29    0.91
   2 -32   2    0.07    0.74
  -2  32  -2    0.79    0.52
   2  32   2    2.03    0.59
  -3 -32  -2    0.76    0.93
   3 -32   2    1.09    0.47
  -3  32  -2   -1.10    0.40
   3  32   2   -0.35    0.45
  -4 -32  -2    1.80    0.97
   4 -32   2    0.90    0.54
   4  32   2    0.53    0.47
  -4  32  -2    0.10    0.67
   5 -32   2    0.44    0.57
  -5 -32  -2    1.69    0.95
   5  32   2    0.01    0.46
  -6 -32  -2    4.93    1.26
  -6  32  -2    1.67    0.70
   6  32   2    2.17    0.59
   7 -33  -2    5.11    1.03
   7  33  -2    2.61    0.79
  -7  33   2    2.97    0.83
   6 -33  -2    1.29    0.72
  -6 -33   2    1.25    1.27
  -6  33   2    0.58    0.72
   6  33  -2    0.96    0.62
   5 -33  -2    0.89    0.67
  -5 -33   2    2.54    1.30
   5  33  -2    1.57    0.61
  -5  33   2    1.39    0.71
   4 -33  -2    0.47    0.54
  -4 -33   2    1.04    1.33
   4  33  -2    0.12    0.48
  -4  33   2    0.42    0.63
   3 -33  -2    0.87    0.51
  -3 -33   2    1.57    1.29
   3  33  -2    0.15    0.43
  -3  33   2   -0.11    0.52
  -2 -33   2    3.05    1.27
   2  33  -2    2.22    0.61
  -2  33   2    3.05    0.67
  -1 -33   2   -0.21    0.91
  -1  33   2    0.50    0.48
   1  33  -2    0.79    0.49
   0 -33  -2    0.53    0.81
   0 -33   2   -0.10    0.97
   0  33   2    0.66    0.55
   0  33  -2    0.89    0.52
  -1 -33  -2   10.52    1.34
   1 -33   2    8.67    1.29
  -1  33  -2   10.68    0.98
   1  33   2   11.25    1.02
   2 -33   2   -1.00    0.67
  -2 -33  -2    0.32    0.84
  -2  33  -2    0.34    0.50
   2  33   2    0.13    0.50
   3 -33   2   -0.30    0.56
  -3 -33  -2    0.63    0.91
  -3  33  -2    0.22    0.53
   3  33   2   -0.24    0.44
  -4 -33  -2    6.90    1.37
   4 -33   2    7.30    0.90
  -5 -33  -2    2.43    1.14
   5  33   2    0.14    0.47
  -6  33  -2   -0.38    0.56
  -6 -34   2    0.52    1.30
   6 -34  -2    0.12    0.59
  -6  34   2   -1.30    0.59
   6  34  -2    0.32    0.55
  -5 -34   2    0.37    1.38
   5 -34  -2    0.04    0.55
  -5  34   2   -0.63    0.58
   5  34  -2   -0.15    0.48
   4 -34  -2    4.69    0.79
  -4 -34   2    4.27    1.38
  -4  34   2    2.51    0.71
   4  34  -2    2.34    0.61
  -3 -34   2   18.93    2.21
   3 -34  -2   19.30    1.18
   3  34  -2   17.74    1.20
  -3  34   2   17.73    1.31
  -2 -34   2    3.96    1.33
   2  34  -2    3.26    0.69
  -2  34   2    2.70    0.68
  -1 -34   2    3.18    1.25
   1  34  -2    2.82    0.63
  -1  34   2    1.65    0.64
   0 -34  -2    2.43    0.94
   0 -34   2    2.30    1.13
   0  34  -2    1.64    0.57
   0  34   2    1.85    0.62
  -1 -34  -2    2.87    0.99
   1 -34   2    0.46    0.90
   1  34   2    1.41    0.60
  -1  34  -2    1.45    0.57
  -2 -34  -2    0.83    0.93
   2 -34   2   -0.74    0.71
   2  34   2    0.21    0.53
  -2  34  -2   -0.05    0.50
  -3 -34  -2    0.96    0.89
   3  34   2    0.20    0.49
  -3  34  -2    0.44    0.53
  -4 -34  -2    0.43    0.87
   4 -34   2    1.49    0.56
   4  34   2    1.15    0.55
  -5 -34  -2    1.16    0.96
  -5  34  -2    0.80    0.60
   5  34   2    0.16    0.48
   6 -35  -2    0.54    0.65
  -6 -35   2    1.49    1.55
  -6  35   2    0.37    0.82
   6  35  -2    0.86    0.59
  -5 -35   2    1.08    1.47
   5 -35  -2    0.24    0.57
   5  35  -2    1.18    0.58
  -5  35   2    0.27    0.67
   4 -35  -2   10.07    1.07
  -4 -35   2    8.69    1.69
   4  35  -2    6.62    0.87
  -4  35   2    9.05    1.09
  -3 -35   2    7.71    1.56
   3  35  -2    6.81    0.84
  -3  35   2    7.51    0.98
  -2 -35   2    7.68    1.47
   2  35  -2    7.59    0.88
  -2  35   2    6.64    0.92
  -1 -35   2    1.03    1.06
   1  35  -2    1.42    0.55
  -1  35   2    0.54    0.57
   0 -35  -2   -0.11    0.88
   0 -35   2   -0.80    0.98
   0  35  -2    0.10    0.50
   0  35   2    0.30    0.54
  -1 -35  -2    2.01    0.97
   1 -35   2    0.16    0.92
  -1  35  -2    0.60    0.55
   1  35   2    1.62    0.60
  -2 -35  -2    1.11    0.96
  -2  35  -2    0.38    0.55
   2  35   2    0.11    0.53
  -3 -35  -2    1.86    1.05
  -3  35  -2    0.85    0.56
   3  35   2    0.41    0.53
  -4 -35  -2    1.90    1.11
   4  35   2    1.82    0.62
  -5 -35  -2    2.50    1.16
  -5  35  -2    0.72    0.61
   5  35   2    0.10    0.48
   6 -36  -2    2.01    0.75
  -6  36   2   -0.84    0.61
  -5 -36   2   -0.69    1.39
   5 -36  -2    0.84    0.62
   5  36  -2   -0.07    0.51
  -5  36   2   -0.45    0.59
  -4 -36   2   -1.00    1.14
  -4  36   2   -0.24    0.61
   4  36  -2    0.02    0.50
  -3 -36   2    0.78    1.24
  -3  36   2   -0.24    0.60
   3  36  -2    0.14    0.50
  -2 -36   2    0.76    1.25
  -2  36   2    0.41    0.60
   2  36  -2    0.37    0.50
  -1 -36   2   -1.80    1.13
   1  36  -2    0.66    0.53
  -1  36   2    0.79    0.61
   0 -36   2    0.19    1.00
   0  36  -2    0.50    0.54
   0  36   2    1.17    0.57
  -1 -36  -2    2.95    1.11
   1 -36   2    2.05    1.08
   1  36   2    3.35    0.73
  -1  36  -2    1.68    0.64
  -2 -36  -2   14.90    1.58
   2  36   2   13.42    1.21
  -2  36  -2   15.74    1.17
  -3 -36  -2    1.06    0.95
   3  36   2    0.26    0.53
  -4 -36  -2    1.34    1.01
   4  36   2    0.56    0.53
   5  36   2    0.35    0.50
  -5  36  -2    1.84    1.00
  -5 -37   2   -0.69    1.49
   5 -37  -2   -0.12    0.54
  -5  37   2   -0.30    0.64
   5  37  -2   -0.91    0.48
  -4 -37   2    1.48    1.52
  -4  37   2    2.84    0.80
   4  37  -2    2.58    0.65
  -3 -37   2    1.97    1.45
  -3  37   2    1.44    0.69
   3  37  -2    2.62    0.68
  -2 -37   2    4.41    1.50
  -2  37   2    3.44    0.80
   2  37  -2    5.02    0.77
  -1 -37   2    3.30    1.24
  -1  37   2    4.02    0.83
   1  37  -2    4.16    0.75
   0 -37   2   -0.16    1.07
   0  37  -2    0.38    0.53
   0  37   2   -0.47    0.54
  -1 -37  -2   -0.89    0.88
   1 -37   2   -1.25    0.89
   1  37   2   -0.50    0.53
  -1  37  -2    0.17    0.52
  -2 -37  -2    1.65    1.07
  -2  37  -2    0.18    0.54
   2  37   2    1.08    0.64
  -3 -37  -2    1.20    1.08
   3  37   2    0.82    0.57
  -3  37  -2    0.71    0.67
  -4 -37  -2    1.11    1.13
   4  37   2    0.30    0.49
  -5 -38   2   -1.17    1.49
   5  38  -2   -0.18    0.60
  -5  38   2    0.52    0.72
  -4 -38   2   -1.03    1.45
  -4  38   2    1.49    0.75
   4  38  -2    0.67    0.56
  -3 -38   2   -1.56    1.28
  -3  38   2   -0.58    0.60
   3  38  -2    0.67    0.53
  -2 -38   2   -1.46    1.19
   2  38  -2    1.21    0.59
  -2  38   2    1.67    0.71
  -1 -38   2   -1.59    1.09
  -1  38   2    1.28    0.62
   1  38  -2    0.01    0.54
   0 -38   2    0.33    1.13
   0  38   2    2.02    0.68
   0  38  -2    3.59    0.75
  -1 -38  -2   -1.58    1.00
  -1  38  -2   -0.36    0.51
   1  38   2    0.05    0.54
  -2 -38  -2    1.71    1.11
   2  38   2    1.03    0.62
  -2  38  -2    1.28    0.69
  -3 -38  -2    0.13    0.94
  -3  38  -2   -0.18    0.59
   3  38   2    0.65    0.59
  -4 -38  -2    1.02    1.04
   4  38   2    0.26    0.56
  -4 -39   2   -3.72    1.43
   4  39  -2   -0.24    0.51
  -4  39   2   -0.47    0.59
  -3 -39   2   -1.33    1.35
  -3  39   2   -0.38    0.60
   3  39  -2    0.49    0.51
  -2 -39   2    3.73    1.40
  -2  39   2    5.75    0.93
   2  39  -2    5.29    0.87
   1  39  -2   -0.10    0.54
  -1  39   2    0.25    0.53
   0 -39   2   -0.94    1.10
   0  39  -2    0.61    0.60
   0  39   2    0.77    0.61
   1  39   2    1.50    0.68
  -1  39  -2    2.81    0.75
   2  39   2   -0.47    0.52
  -2  39  -2   -0.38    0.61
  -3 -39  -2   -0.85    1.07
   3  39   2    0.15    0.56
  -3  39  -2   -0.33    0.57
  -4  40   2   -0.16    0.68
  -3  40   2   -0.15    0.65
   3  40  -2    0.56    0.56
  -2 -40   2   -1.44    1.39
   2  40  -2    3.78    0.77
  -2  40   2    3.39    0.81
  -1 -40   2   -1.10    1.29
   1  40  -2    2.23    0.72
  -1  40   2    4.32    0.89
   0  40   2   -0.12    0.61
   0  40  -2   -0.05    0.55
   1  40   2    0.66    0.65
  -1  40  -2    0.04    0.54
  -2  40  -2   -0.36    0.55
   2  40   2   -0.07    0.51
  -3 -40  -2   -2.03    1.09
   3  40   2    1.08    0.65
  -3 -41   2   -2.82    1.27
  -3  41   2    1.13    0.76
   3  41  -2    1.23    0.61
  -2 -41   2   -3.52    1.43
  -2  41   2    1.70    0.76
   2  41  -2    1.56    0.60
   1  41  -2    0.79    0.58
  -1  41   2    0.65    0.62
   0  41  -2   -0.05    0.57
   0  41   2    0.03    0.58
   1  41   2   -0.21    0.56
  -1  41  -2   -0.56    0.59
  -2  41  -2   -0.38    0.57
   2  41   2   -0.35    0.52
   2  42  -2    0.65    0.63
  -2  42   2   -0.85    0.59
   1  42  -2   -0.32    0.50
  -1  42   2   -0.36    0.62
   0  42  -2   -0.29    0.58
   0  42   2    0.32    0.63
  -1  42  -2   -0.23    0.59
   0  43  -2    1.82    1.07
   9   0  -3   -0.13    0.46
   8   0  -3   -0.24    0.39
  -7   0   3    0.52    0.46
   7   0  -3    0.16    0.37
   7   0  -3    0.03    0.40
  -6   0   3    0.19    0.47
   6   0  -3    0.41    0.41
   6   0  -3    0.80    0.43
   5   0  -3    0.32    0.34
  -5   0   3    0.30    0.37
   5   0  -3   -0.11    0.30
   4   0  -3   -0.01    0.24
  -4   0   3   -0.18    0.34
   4   0  -3    0.28    0.29
   3   0  -3   -0.13    0.25
  -3   0   3   -0.12    0.38
   3   0  -3    0.26    0.27
   2   0  -3   -0.59    0.25
  -2   0   3    0.48    0.32
   2   0  -3   -0.04    0.22
   1   0  -3   -0.25    0.24
   1   0  -3   -0.05    0.17
  -1   0   3    0.22    0.24
   0   0  -3   -0.42    0.23
   0   0   3    0.42    0.30
  -1   0  -3    0.40    0.27
   1   0   3    0.74    0.38
  -2   0  -3    0.06    0.31
   2   0   3    0.13    0.36
  -3   0  -3    0.56    0.35
   3   0   3    0.43    0.40
   4   0   3    0.41    0.47
  -4   0  -3    0.39    0.38
  -5   0  -3    0.78    0.45
   5   0   3    0.36    0.52
  -6   0  -3   -0.21    0.45
   6   0   3   -0.21    0.58
   7   0   3    0.53    0.68
  -7   0  -3    0.39    0.51
  -8   0  -3    0.61    0.53
   8   0   3    0.26    0.66
   9   0   3    1.26    0.88
  10  -1  -3    0.29    0.52
   9  -1  -3    0.13    0.48
   9   1  -3    0.92    0.52
   8  -1  -3    0.06    0.44
   8   1  -3    0.02    0.42
  -7  -1   3    1.06    0.49
   7  -1  -3    0.70    0.43
   7   1  -3    0.57    0.43
  -7   1   3    1.52    0.49
   7   1  -3    0.74    0.41
  -6  -1   3   10.30    0.91
   6  -1  -3    9.45    0.81
   6  -1  -3   10.14    0.74
  -6   1   3    9.23    0.82
   6   1  -3   10.18    0.80
   6   1  -3    9.38    0.73
   5  -1  -3   60.74    1.50
   5  -1  -3   61.06    1.50
  -5  -1   3   60.80    1.70
   5   1  -3   62.49    1.47
   5   1  -3   61.94    1.48
  -5   1   3   59.85    1.64
   4  -1  -3   42.93    1.10
   4  -1  -3   45.44    1.13
  -4  -1   3   45.13    1.32
   4   1  -3   45.04    1.15
  -4   1   3   44.96    1.24
   4   1  -3   43.61    1.11
   3  -1  -3   90.07    1.71
   3  -1  -3   87.11    1.64
  -3  -1   3   89.57    2.02
   3   1  -3   86.75    1.64
   3   1  -3   91.35    1.66
  -3   1   3   89.66    1.93
  -2  -1   3   34.26    1.02
   2  -1  -3   33.14    0.85
   2  -1  -3   34.64    0.82
  -2   1   3   34.04    0.91
   2   1  -3   33.60    0.79
   2   1  -3   33.36    0.83
  -1  -1   3   21.52    0.77
   1  -1  -3   22.52    0.70
  -1   1   3   23.02    0.75
   1   1  -3   22.84    0.65
   1   1  -3   23.09    0.55
   0  -1  -3   20.32    0.67
   0  -1   3   20.94    0.82
   0   1   3   21.74    0.85
   0   1  -3   20.15    0.66
  -1  -1  -3  181.70    3.00
   1  -1   3  181.28    3.77
   1   1   3  180.61    3.78
  -1   1  -3  181.78    3.02
   1   1   3  184.97    2.40
  -2  -1  -3    6.33    0.61
   2  -1   3    6.91    0.66
  -2   1  -3    6.14    0.53
   2   1   3    5.62    0.64
   2   1   3    6.10    0.23
  -3  -1  -3   27.49    1.01
   3  -1   3   28.26    1.24
  -3   1  -3   27.40    1.04
   3   1   3   26.96    0.58
   3   1   3   27.05    1.24
   4  -1   3   34.82    1.56
  -4  -1  -3   34.20    1.25
   4   1   3   33.18    0.78
  -4   1  -3   34.75    1.29
   4   1   3   33.20    1.53
  -5  -1  -3    5.57    0.70
   5  -1   3    6.63    0.90
   5   1   3    6.07    0.87
  -5   1  -3    5.50    0.68
  -6  -1  -3    0.73    0.51
   6  -1   3    0.47    0.56
  -6   1  -3    1.20    0.54
   6   1   3    0.14    0.56
   7  -1   3   -0.05    0.62
  -7  -1  -3    0.34    0.50
   7   1   3   -0.28    0.63
  -7   1  -3    0.21    0.52
   8  -1   3    0.72    0.71
  -8  -1  -3    0.84    0.57
   8   1   3   -0.63    0.66
  -8   1  -3    0.55    0.54
   9  -1   3    0.35    0.75
   9   1   3    0.55    0.85
  10  -2  -3    0.20    0.52
   9  -2  -3   -0.36    0.46
   9   2  -3    0.15    0.45
  -8  -2   3    1.72    0.58
   8  -2  -3   -0.17    0.42
   8   2  -3    1.18    0.47
   8   2  -3    0.68    0.47
  -7  -2   3    1.11    0.51
   7  -2  -3    0.42    0.43
   7   2  -3    0.24    0.39
  -7   2   3    0.99    0.46
   7   2  -3    0.95    0.41
  -6  -2   3   26.31    1.28
   6  -2  -3   26.28    1.13
   6   2  -3   26.69    1.10
  -6   2   3   26.99    1.14
   6   2  -3   25.79    1.01
   5  -2  -3    6.07    0.62
  -5  -2   3    6.17    0.68
   5  -2  -3    5.69    0.54
  -5   2   3    6.40    0.60
   5   2  -3    5.92    0.53
   5   2  -3    5.78    0.57
   4  -2  -3   11.22    0.64
   4  -2  -3   10.38    0.59
  -4  -2   3    9.01    0.71
  -4   2   3    9.41    0.60
   4   2  -3   11.09    0.56
   4   2  -3    9.59    0.62
  -3  -2   3    1.84    0.49
   3  -2  -3    2.58    0.41
   3  -2  -3    1.58    0.30
   3   2  -3    1.33    0.33
  -3   2   3    1.73    0.37
   3   2  -3    1.89    0.32
   2  -2  -3  152.70    2.48
  -2  -2   3  149.68    3.04
   2   2  -3  148.63    2.32
   2   2  -3  151.46    2.40
  -2   2   3  150.34    2.83
   1  -2  -3   -0.05    0.28
  -1  -2   3    0.05    0.30
   1   2  -3   -0.18    0.21
  -1   2   3    0.20    0.23
   1   2  -3    0.01    0.17
   0  -2   3  140.41    2.97
   0  -2  -3  143.87    2.39
   0   2  -3  141.73    2.38
   0   2  -3  143.99    1.95
   0   2   3  146.40    2.96
   1  -2   3   21.90    0.96
  -1  -2  -3   22.14    0.79
   1   2   3   21.89    0.94
   1   2   3   23.08    0.43
  -1   2  -3   22.08    0.77
   2  -2   3    0.17    0.36
  -2  -2  -3    0.13    0.32
   2   2   3   -0.02    0.37
  -2   2  -3    0.87    0.35
   2   2   3    0.33    0.12
  -3  -2  -3    0.04    0.28
   3  -2   3    0.16    0.40
   3   2   3   -0.07    0.14
   3   2   3    0.03    0.38
  -3   2  -3    0.10    0.36
  -4  -2  -3   15.84    0.89
   4  -2   3   15.48    1.06
   4   2   3   16.15    1.14
   4   2   3   16.18    0.55
  -4   2  -3   15.53    0.90
  -5  -2  -3    3.88    0.60
   5  -2   3    4.81    0.76
   5   2   3    4.06    0.83
  -5   2  -3    3.83    0.61
  -6  -2  -3   17.73    1.09
   6  -2   3   17.88    1.36
   6   2   3   15.00    1.28
  -6   2  -3   16.69    1.14
   7  -2   3    0.39    0.63
  -7  -2  -3    0.75    0.52
   7   2   3    0.76    0.72
  -7   2  -3    0.79    0.54
   8  -2   3    1.72    0.79
  -8  -2  -3    1.86    0.60
   8   2   3    0.59    0.78
  -8   2  -3    2.00    0.68
  -9  -2  -3    3.50    0.97
   9  -2   3    0.22    0.78
  -9   2  -3    1.28    0.59
  10  -3  -3    0.68    0.56
   9  -3  -3    0.13    0.52
   9   3  -3   -0.15    0.49
  -8  -3   3    1.88    0.58
   8  -3  -3    0.39    0.48
   8   3  -3    0.04    0.44
   8   3  -3    0.65    0.43
   7  -3  -3    8.69    0.80
  -7  -3   3   10.55    0.94
   7   3  -3    8.90    0.75
   7   3  -3    8.25    0.80
   6  -3  -3    7.52    0.76
  -6  -3   3    7.32    0.87
  -6   3   3    7.05    0.70
   6   3  -3    6.85    0.68
   6   3  -3    7.43    0.66
   5  -3  -3    2.56    0.49
  -5  -3   3    2.02    0.52
  -5   3   3    2.28    0.39
   5   3  -3    2.08    0.43
   5   3  -3    2.50    0.39
   4  -3  -3   70.57    1.57
  -4  -3   3   72.16    1.90
   4   3  -3   74.32    1.56
   4   3  -3   71.67    1.46
  -4   3   3   69.63    1.59
  -3  -3   3   63.70    1.70
   3  -3  -3   65.39    1.41
  -3   3   3   62.90    1.37
   3   3  -3   61.24    1.31
   3   3  -3   63.68    1.26
   2  -3  -3   44.32    1.07
  -2  -3   3   44.15    1.27
  -2   3   3   46.21    1.00
   2   3  -3   46.51    0.98
   2   3  -3   45.89    0.97
   1  -3  -3   35.17    0.89
  -1  -3   3   33.50    1.05
   1   3  -3   33.45    0.70
   1   3  -3   34.32    0.81
  -1   3   3   34.71    0.91
   0  -3  -3    1.14    0.33
   0  -3   3    1.54    0.41
   0   3  -3    0.85    0.26
   0   3   3    1.01    0.18
   0   3   3    0.89    0.33
   0   3  -3    0.68    0.13
   1  -3   3   15.68    0.82
  -1  -3  -3   16.62    0.70
   1   3   3   15.50    0.38
  -1   3  -3   14.45    0.64
   1   3   3   15.36    0.81
   2  -3   3    3.46    0.53
  -2  -3  -3    4.59    0.47
   2   3   3    4.61    0.62
   2   3   3    4.19    0.25
  -2   3  -3    3.66    0.48
   3  -3   3    3.67    0.63
  -3  -3  -3    3.34    0.50
  -3   3  -3    2.79    0.46
   3   3   3    3.40    0.28
   3   3   3    3.13    0.58
   4  -3   3    4.27    0.68
  -4  -3  -3    4.22    0.58
   4   3   3    3.92    0.72
  -4   3  -3    4.23    0.60
   4   3   3    4.18    0.38
  -5  -3  -3    0.95    0.45
   5  -3   3    0.66    0.56
  -5   3  -3    0.54    0.45
   5   3   3    0.12    0.60
   6  -3   3    0.88    0.60
  -6  -3  -3    0.57    0.47
  -6   3  -3    0.74    0.55
   6   3   3    1.39    0.72
  -7  -3  -3    7.64    0.90
   7  -3   3    6.95    1.06
  -7   3  -3    6.73    0.89
   7   3   3    7.58    1.10
  -8  -3  -3    1.83    0.59
   8  -3   3    0.87    0.69
   8   3   3   -0.80    0.65
  -8   3  -3    0.41    0.55
  -9   3  -3    3.26    0.75
  10  -4  -3    2.27    0.69
   9  -4  -3    2.63    0.67
   9   4  -3    2.43    0.66
  -8  -4   3    3.42    0.70
   8  -4  -3    3.30    0.67
   8   4  -3    2.06    0.58
   8   4  -3    3.05    0.56
  -7  -4   3    7.52    0.91
   7  -4  -3    6.05    0.72
   7   4  -3    6.42    0.63
   7   4  -3    5.41    0.65
  -6  -4   3    1.56    0.62
   6  -4  -3    1.48    0.55
   6   4  -3    1.59    0.43
   6   4  -3    1.45    0.50
  -6   4   3    1.32    0.44
   5  -4  -3    0.67    0.36
  -5  -4   3    0.41    0.46
   5   4  -3    0.20    0.29
  -5   4   3    0.33    0.30
   5   4  -3   -0.09    0.30
  -4  -4   3    0.39    0.47
   4  -4  -3    1.12    0.37
  -4   4   3    0.42    0.27
   4   4  -3    0.98    0.27
   4   4  -3    0.67    0.32
  -3  -4   3   74.05    1.91
   3  -4  -3   76.66    1.55
   3   4  -3   75.23    1.45
  -3   4   3   65.10    1.43
   3   4  -3   76.30    1.38
   2  -4  -3   17.72    0.73
  -2  -4   3   17.62    0.96
   2   4  -3   17.79    0.61
  -2   4   3   19.55    0.51
   2   4  -3   17.79    0.60
   1  -4  -3    0.19    0.29
  -1  -4   3    1.69    0.43
   1   4  -3    0.00    0.18
   1   4  -3    0.61    0.23
  -1   4   3    0.37    0.23
   0  -4  -3   52.45    1.15
   0  -4   3   50.62    1.43
   0   4   3   50.30    1.33
   0   4   3   51.70    0.92
   0   4  -3   51.42    1.12
   0   4  -3   49.37    0.81
   1  -4   3   37.91    1.27
  -1  -4  -3   37.88    1.00
  -1   4  -3   38.63    1.04
   1   4   3   37.52    1.26
   1   4   3   38.55    0.71
  -2  -4  -3   14.13    0.71
   2  -4   3   14.33    0.85
  -2   4  -3   13.93    0.70
   2   4   3   13.68    0.42
   2   4   3   14.35    0.87
  -3  -4  -3    2.53    0.44
   3  -4   3    2.37    0.54
   3   4   3    2.27    0.55
  -3   4  -3    1.79    0.45
   3   4   3    2.64    0.25
  -4  -4  -3   13.07    0.80
   4  -4   3   13.80    1.08
  -4   4  -3   11.90    0.84
   4   4   3   13.47    1.08
   4   4   3   12.66    0.54
  -5  -4  -3    0.60    0.41
   5  -4   3    0.46    0.51
  -5   4  -3    0.05    0.43
   5   4   3   -0.18    0.36
   5   4   3   -0.01    0.58
   6  -4   3    5.31    0.85
  -6  -4  -3    4.73    0.68
   6   4   3    4.93    0.90
  -6   4  -3    4.80    0.73
   7  -4   3    2.77    0.78
  -7  -4  -3    3.67    0.68
   7   4   3    3.60    0.89
  -7   4  -3    2.79    0.73
   8  -4   3    1.25    0.70
  -8  -4  -3    1.59    0.56
  -8   4  -3    1.13    0.64
   8   4   3    0.09    0.69
  -9   4  -3    2.07    0.66
   9   4   3    0.58    0.97
  10  -5  -3    1.03    0.61
   9  -5  -3    0.66    0.55
   9   5  -3    0.67    0.56
   8  -5  -3   -0.85    0.42
  -8  -5   3    0.69    0.54
   8   5  -3    0.11    0.40
   8   5  -3   -0.18    0.44
  -7  -5   3    3.56    0.74
   7  -5  -3    3.32    0.63
   7   5  -3    2.84    0.56
   7   5  -3    2.93    0.48
   6  -5  -3    1.63    0.51
  -6  -5   3    2.10    0.68
   6   5  -3    1.61    0.50
  -6   5   3    2.00    0.44
   6   5  -3    1.48    0.42
   5  -5  -3   43.32    1.29
  -5  -5   3   42.77    1.58
   5   5  -3   42.22    1.27
   5   5  -3   44.99    1.13
  -5   5   3   44.63    1.18
  -4  -5   3   -0.58    0.47
   4  -5  -3    0.08    0.30
   4   5  -3    0.46    0.25
  -4   5   3   -0.15    0.23
   4   5  -3    0.05    0.30
   3  -5  -3    3.09    0.42
  -3  -5   3    2.42    0.54
  -3   5   3    3.07    0.15
   3   5  -3    3.49    0.38
   3   5  -3    2.26    0.33
  -2  -5   3   39.54    1.32
   2  -5  -3   40.35    1.04
  -2   5   3   42.15    0.85
   2   5  -3   42.30    0.89
   2   5  -3   40.30    0.91
  -1  -5   3   15.33    0.85
   1  -5  -3   13.49    0.62
   1   5  -3   12.62    0.45
   1   5  -3   12.95    0.51
  -1   5   3   12.95    0.52
   0  -5   3    8.98    0.76
   0  -5  -3    7.25    0.51
   0   5  -3    5.81    0.44
   0   5   3    5.92    0.56
   0   5  -3    6.36    0.29
   0   5   3    7.29    0.36
  -1  -5  -3   32.66    0.95
   1  -5   3   33.13    1.23
   1   5   3   33.28    0.69
  -1   5  -3   33.94    0.96
  -1   5  -3   34.27    0.55
   1   5   3   32.42    1.18
   2  -5   3    9.08    0.79
  -2  -5  -3    9.32    0.62
   2   5   3    8.98    0.37
  -2   5  -3   10.35    0.27
  -2   5  -3    9.89    0.63
   2   5   3    8.34    0.76
   3  -5   3   98.89    2.61
  -3  -5  -3   95.12    2.03
   3   5   3   96.63    1.61
  -3   5  -3   99.61    2.19
   3   5   3   97.14    2.68
  -4  -5  -3    8.37    0.72
   4  -5   3    8.09    0.83
   4   5   3    7.30    0.93
   4   5   3    7.73    0.46
  -4   5  -3    7.09    0.73
  -5  -5  -3    3.25    0.54
   5  -5   3    3.96    0.71
   5   5   3    3.24    0.75
   5   5   3    3.60    0.38
  -5   5  -3    3.06    0.65
   6  -5   3    0.66    0.58
  -6  -5  -3    0.83    0.47
   6   5   3    1.11    0.75
  -6   5  -3    1.17    0.60
   7  -5   3    1.86    0.69
  -7  -5  -3    2.43    0.59
  -7   5  -3    1.85    0.69
   7   5   3    1.91    0.79
   8  -5   3    0.62    0.65
  -8  -5  -3    1.21    0.52
  -8   5  -3    0.32    0.55
   8   5   3    0.05    0.79
  -9   5  -3    1.58    0.64
   9   5   3   -1.10    0.84
  10  -6  -3    1.12    0.64
   9  -6  -3   -0.51    0.50
   9   6  -3   -0.57    0.52
   8  -6  -3    2.43    0.63
  -8  -6   3    2.90    0.72
   8   6  -3    1.55    0.54
   8   6  -3    2.34    0.57
   7  -6  -3    0.61    0.48
  -7  -6   3    0.92    0.57
   7   6  -3    0.19    0.36
   7   6  -3    0.52    0.43
   6  -6  -3    0.35    0.50
  -6  -6   3    2.28    0.72
   6   6  -3    0.24    0.44
   6   6  -3    1.09    0.38
   5  -6  -3    3.09    0.53
  -5  -6   3    2.60    0.65
   5   6  -3    2.20    0.44
  -5   6   3    3.19    0.40
   5   6  -3    2.81    0.38
   4  -6  -3    1.36    0.41
  -4  -6   3    1.91    0.56
  -4   6   3    1.64    0.23
   4   6  -3    1.49    0.37
   4   6  -3    1.31    0.28
  -3  -6   3    3.09    0.59
   3  -6  -3    4.03    0.47
   3   6  -3    3.18    0.36
   3   6  -3    3.95    0.37
   2  -6  -3   85.69    1.68
  -2  -6   3   85.89    2.15
   2   6  -3   85.11    1.54
  -2   6   3   88.04    1.60
   2   6  -3   87.76    1.48
   1  -6  -3   46.61    1.15
  -1  -6   3   49.18    1.47
  -1   6   3   49.47    1.17
   1   6  -3   49.15    0.97
   1   6  -3   49.95    1.01
   0  -6  -3    3.00    0.37
   0  -6   3    3.92    0.56
   0   6  -3    2.61    0.26
   0   6   3    2.83    0.27
   0   6   3    2.39    0.37
   0   6  -3    2.45    0.33
   1  -6   3    0.02    0.39
  -1  -6  -3    0.02    0.30
  -1   6  -3   -0.24    0.24
   1   6   3    0.14    0.15
   1   6   3   -0.26    0.33
  -1   6  -3    0.06    0.11
   2  -6   3    1.77    0.46
  -2  -6  -3    2.18    0.40
   2   6   3    2.39    0.24
  -2   6  -3    2.26    0.20
  -2   6  -3    1.80    0.38
   2   6   3    1.87    0.48
   3  -6   3    3.52    0.57
  -3  -6  -3    3.37    0.46
  -3   6  -3    3.37    0.28
   3   6   3    3.62    0.65
   3   6   3    4.58    0.35
  -3   6  -3    4.59    0.58
  -4  -6  -3    6.49    0.66
   4  -6   3    6.33    0.75
   4   6   3    6.76    0.92
   4   6   3    6.61    0.47
  -4   6  -3    5.99    0.71
   5  -6   3    0.65    0.53
  -5  -6  -3    0.56    0.41
  -5   6  -3    1.13    0.49
   5   6   3    0.81    0.28
   5   6   3    0.69    0.61
  -6  -6  -3    3.97    0.64
   6  -6   3    4.88    0.85
   6   6   3    3.74    0.87
  -6   6  -3    4.05    0.71
   7  -6   3    5.57    0.95
  -7  -6  -3    5.51    0.75
   7   6   3    4.30    0.97
  -7   6  -3    5.34    0.84
  -8  -6  -3    2.22    0.70
   8  -6   3    0.92    0.68
   8   6   3    0.50    0.90
  -8   6  -3    0.82    0.62
   9   6   3   -1.67    0.89
  -9   6  -3    1.44    0.68
  10  -7  -3    1.41    0.66
   9  -7  -3    0.33    0.56
   9   7  -3   -0.14    0.50
  -8  -7   3    4.34    0.82
   8  -7  -3    3.30    0.64
   8   7  -3    4.90    0.70
   7  -7  -3   11.97    0.90
  -7  -7   3   11.16    1.09
   7   7  -3   12.19    0.85
   7   7  -3   12.42    0.74
   6  -7  -3   14.12    0.92
  -6  -7   3   16.68    1.17
   6   7  -3   15.51    0.95
   6   7  -3   14.93    0.72
  -5  -7   3   14.45    1.02
   5  -7  -3   14.31    0.88
   5   7  -3   14.45    0.83
   5   7  -3   15.55    0.65
  -5   7   3   16.59    0.59
  -4  -7   3    0.39    0.48
   4  -7  -3    1.39    0.38
   4   7  -3    1.11    0.31
   4   7  -3    1.26    0.25
   3  -7  -3   26.54    0.97
  -3  -7   3   26.59    1.20
   3   7  -3   26.71    0.67
   3   7  -3   25.56    0.82
  -2  -7   3    6.43    0.77
   2  -7  -3    5.51    0.52
   2   7  -3    4.77    0.40
  -2   7   3    5.77    0.24
   2   7  -3    4.60    0.46
  -1  -7   3   38.80    1.30
   1  -7  -3   37.56    1.00
   1   7  -3   37.85    0.84
   1   7  -3   38.55    0.86
  -1   7   3   38.66    0.99
   0  -7  -3   49.51    1.16
   0  -7   3   45.91    1.44
   0   7   3   47.04    1.33
   0   7   3   46.97    0.96
   0   7  -3   47.36    0.88
   0   7  -3   48.23    1.08
  -1  -7  -3   -0.11    0.30
   1  -7   3   -0.05    0.36
  -1   7  -3    0.04    0.13
   1   7   3    0.14    0.16
  -1   7  -3   -0.18    0.25
   1   7   3   -0.28    0.33
   2  -7   3   40.36    1.42
  -2  -7  -3   41.83    1.12
  -2   7  -3   39.68    0.73
   2   7   3   41.27    1.50
  -2   7  -3   40.37    1.21
   2   7   3   39.88    0.87
   3  -7   3    9.54    0.81
  -3  -7  -3    8.85    0.64
  -3   7  -3    8.91    0.69
  -3   7  -3    8.71    0.37
   3   7   3    8.61    0.90
   3   7   3    8.53    0.45
  -4  -7  -3   14.49    0.81
   4  -7   3   15.05    1.03
  -4   7  -3   13.00    0.91
   4   7   3   14.76    0.61
   4   7   3   15.21    1.18
  -4   7  -3   15.00    0.56
  -5  -7  -3    1.00    0.42
   5  -7   3    0.88    0.50
   5   7   3    1.16    0.63
   5   7   3    1.07    0.29
  -5   7  -3    0.97    0.53
  -6  -7  -3   -0.03    0.38
   6  -7   3    0.82    0.59
   6   7   3    0.12    0.69
  -6   7  -3    0.30    0.48
  -7  -7  -3    3.84    0.65
   7  -7   3    3.57    0.83
  -7   7  -3    1.84    0.66
   7   7   3    3.39    1.00
   8  -7   3    2.17    0.79
  -8   7  -3    2.27    0.78
   8   7   3    3.25    1.12
   9   7   3    0.65    1.10
  -9   7  -3    3.66    0.82
  10  -8  -3    0.49    0.59
  10   8  -3    1.00    0.68
   9  -8  -3    6.43    0.92
  -9  -8   3    6.23    0.99
   9   8  -3    5.98    0.81
  -8  -8   3   27.87    1.61
   8  -8  -3   29.63    1.44
   8   8  -3   27.69    1.33
   7  -8  -3   11.45    0.98
  -7  -8   3   10.71    1.11
   7   8  -3   11.26    0.84
   7   8  -3   11.50    0.72
  -6  -8   3    1.29    0.70
   6  -8  -3    0.37    0.44
   6   8  -3    0.10    0.36
   6   8  -3    0.38    0.30
  -5  -8   3    1.60    0.60
   5  -8  -3    1.29    0.44
   5   8  -3    1.96    0.31
   5   8  -3    1.10    0.41
  -4  -8   3   59.67    1.90
   4  -8  -3   61.55    1.55
   4   8  -3   61.73    1.17
   4   8  -3   60.00    1.43
   3  -8  -3   13.80    0.72
  -3  -8   3   14.15    1.00
   3   8  -3   12.27    0.60
   3   8  -3   13.15    0.47
   2  -8  -3   58.80    1.12
  -2  -8   3   57.04    1.75
   2  -8  -3   57.77    1.35
   2   8  -3   56.21    1.22
   2   8  -3   58.16    1.06
   1  -8  -3    1.01    0.37
  -1  -8   3    2.23    0.57
  -1   8   3    1.02    0.26
   1   8  -3    1.04    0.24
  -1   8   3    1.25    0.27
   1   8  -3    1.13    0.24
   0  -8   3   22.96    1.05
   0  -8  -3   22.43    0.79
   0   8   3   22.64    0.67
   0   8  -3   22.70    0.58
   0   8  -3   21.91    0.70
   0   8   3   22.02    0.84
  -1  -8  -3   23.05    0.81
   1  -8   3   22.25    1.02
  -1   8  -3   23.86    0.55
  -1   8  -3   22.59    0.83
   1   8   3   21.27    0.62
   1   8   3   22.75    1.00
   2  -8   3   50.30    1.62
  -2  -8  -3   48.09    1.22
   2   8   3   48.00    1.66
  -2   8  -3   47.31    1.32
  -2   8  -3   47.62    0.87
   2   8   3   48.11    1.01
   3  -8   3    1.80    0.48
  -3  -8  -3    1.85    0.39
   3   8   3    1.54    0.27
  -3   8  -3    1.82    0.23
  -3   8  -3    1.36    0.43
   3   8   3    0.86    0.58
   4  -8   3    1.38    0.50
  -4  -8  -3    0.79    0.39
  -4   8  -3    0.93    0.52
   4   8   3    1.55    0.31
   4   8   3    1.10    0.61
  -4   8  -3    1.07    0.26
   5  -8   3    0.66    0.53
  -5  -8  -3    1.23    0.44
   5   8   3   -0.02    0.58
  -5   8  -3    0.50    0.53
   5   8   3    1.17    0.31
   6  -8   3    1.54    0.62
  -6  -8  -3    1.95    0.51
   6   8   3    1.48    0.73
  -6   8  -3    1.48    0.65
  -7  -8  -3    2.85    0.60
   7  -8   3    1.60    0.70
  -7   8  -3    1.27    0.69
   7   8   3    1.65    0.93
   8  -8   3    0.18    0.62
   8   8   3    0.43    0.91
  -8   8  -3    1.63    0.72
   9   8   3   -1.81    0.97
  -9   8  -3    2.62    0.84
  10  -9  -3    7.03    0.98
  10   9  -3    8.69    1.08
   9  -9  -3   -0.06    0.59
  -9  -9   3    1.51    0.73
   9   9  -3   -0.49    0.49
  -8  -9   3    4.81    0.91
   8  -9  -3    2.43    0.61
   8   9  -3    3.36    0.65
   7  -9  -3    5.60    0.80
  -7  -9   3    5.41    0.91
   7   9  -3    4.45    0.63
  -6  -9   3    8.46    1.07
   6  -9  -3    7.77    0.79
   6   9  -3    7.14    0.56
   6   9  -3    8.97    0.79
   5  -9  -3   46.09    1.42
  -5  -9   3   47.34    1.85
   5   9  -3   45.96    1.05
   5   9  -3   45.51    1.34
   4  -9  -3   24.55    0.96
  -4  -9   3   23.72    1.24
   4   9  -3   25.08    0.64
   4   9  -3   24.43    0.91
   3  -9  -3   75.12    1.66
  -3  -9   3   72.94    2.15
   3   9  -3   73.26    1.54
   3   9  -3   72.50    1.24
   2  -9  -3    7.33    0.31
  -2  -9   3    7.63    0.86
   2  -9  -3    7.80    0.59
   2   9  -3    7.74    0.38
   2   9  -3    6.91    0.50
  -1  -9   3    0.44    0.55
   1  -9  -3    0.19    0.35
   1   9  -3    0.39    0.21
  -1   9   3    0.21    0.27
   1   9  -3    0.07    0.19
  -1   9   3    0.05    0.24
   0  -9   3    2.44    0.55
   0  -9  -3    1.38    0.38
   0   9  -3    1.26    0.28
   0   9   3    1.55    0.26
   0   9  -3    1.24    0.22
   0   9   3    0.96    0.37
  -1  -9  -3   32.87    0.97
   1  -9   3   31.34    1.22
   1   9   3   32.42    0.80
  -1   9  -3   33.88    0.71
  -1   9  -3   33.69    1.00
   1   9   3   33.19    1.22
   2  -9   3   13.13    0.86
  -2  -9  -3   12.40    0.67
  -2   9  -3   12.51    0.43
   2   9   3   12.66    0.92
  -2   9  -3   13.74    0.74
   2   9   3   12.88    0.54
  -3  -9  -3   50.35    1.33
   3  -9   3   49.52    1.74
  -3   9  -3   47.38    1.47
   3   9   3   48.87    1.11
  -3   9  -3   49.90    0.98
   3   9   3   48.63    1.89
   4  -9   3    0.25    0.42
  -4  -9  -3    0.24    0.36
   4   9   3   -0.29    0.53
  -4   9  -3    0.51    0.45
   4   9   3   -0.02    0.24
  -4   9  -3   -0.09    0.22
   5  -9   3    5.71    0.79
  -5  -9  -3    6.27    0.67
  -5   9  -3    6.28    0.83
   5   9   3    6.40    0.97
   5   9   3    7.08    0.55
   6  -9   3    0.77    0.58
  -6  -9  -3    0.60    0.42
  -6   9  -3    1.23    0.61
   6   9   3    0.81    0.81
   7  -9   3    1.77    0.67
  -7  -9  -3    3.54    0.63
   7   9   3    1.82    0.95
  -7   9  -3    1.84    0.71
   8   9   3   -0.39    0.97
  -8   9  -3    0.45    0.64
  -9   9  -3    2.60    1.17
   9   9   3   -2.62    1.01
  10 -10  -3    0.38    0.63
  10  10  -3    0.67    0.61
   9 -10  -3   -0.25    0.54
  -9 -10   3    1.02    0.75
   9  10  -3   -0.38    0.47
  -8 -10   3    1.96    0.78
   8 -10  -3    0.18    0.56
   8  10  -3    0.81    0.50
   7 -10  -3    4.34    0.71
  -7 -10   3    4.94    0.93
   7  10  -3    5.13    0.69
   6 -10  -3    2.04    0.54
  -6 -10   3    2.49    0.74
   6  10  -3    2.04    0.34
   6  10  -3    3.03    0.54
   5 -10  -3    1.44    0.52
  -5 -10   3    0.47    0.67
   5  10  -3    0.52    0.41
   5  10  -3    1.29    0.27
  -4 -10   3    2.69    0.66
   4 -10  -3    2.62    0.46
   4  10  -3    2.68    0.26
   4  10  -3    2.23    0.37
   3 -10  -3    2.19    0.42
  -3 -10   3    1.63    0.62
   3  10  -3    1.98    0.20
   3  10  -3    2.07    0.36
  -2 -10   3   24.95    1.28
   2 -10  -3   26.09    0.90
   2 -10  -3   27.35    0.68
   2  10  -3   28.85    0.63
   2  10  -3   26.29    0.79
  -1 -10   3    7.70    0.95
   1 -10  -3    7.71    0.63
   1  10  -3    7.68    0.39
  -1  10   3    7.57    0.57
   1  10  -3    7.76    0.45
  -1  10   3    7.26    0.51
   0 -10   3    0.44    0.50
   0 -10  -3   -0.35    0.34
   0  10  -3   -0.04    0.20
   0  10   3    0.17    0.30
   0  10  -3    0.12    0.25
   0  10   3   -0.03    0.21
  -1 -10  -3    8.14    0.57
   1 -10   3    8.43    0.75
   1  10   3    8.31    0.71
  -1  10  -3    8.41    0.39
   1  10   3    8.41    0.45
  -1  10  -3    8.30    0.58
   2 -10   3   14.08    0.89
  -2 -10  -3   14.12    0.70
   2  10   3   13.41    0.55
   2  10   3   12.85    0.95
  -2  10  -3   13.31    0.47
  -2  10  -3   13.90    0.79
  -3 -10  -3   45.15    1.25
   3 -10   3   47.62    1.72
   3  10   3   47.32    1.84
  -3  10  -3   46.78    0.97
   3  10   3   46.62    1.11
  -3  10  -3   45.88    1.50
   4 -10   3    6.97    0.87
  -4 -10  -3    6.45    0.64
   4  10   3    6.40    0.50
   4  10   3    5.11    0.85
  -4  10  -3    5.57    0.71
  -4  10  -3    6.14    0.48
   5 -10   3    0.69    0.53
  -5 -10  -3    1.21    0.43
   5  10   3    0.69    0.64
   5  10   3    0.82    0.31
  -5  10  -3    1.13    0.59
   6 -10   3    0.59    0.55
  -6 -10  -3    0.40    0.42
  -6  10  -3    0.15    0.55
   6  10   3    0.44    0.73
   7 -10   3    0.81    0.63
  -7  10  -3    1.31    0.60
   7  10   3   -0.10    0.79
   8  10   3    2.07    1.05
  -8  10  -3    2.30    0.78
  10 -11  -3    0.49    0.59
  10  11  -3   -0.49    0.56
  -9 -11   3    1.66    0.82
   9 -11  -3    0.01    0.61
   9  11  -3    0.12    0.51
  -8 -11   3    2.61    0.86
   8 -11  -3    1.69    0.67
   8  11  -3    2.41    0.62
  -7 -11   3    1.80    0.70
   7 -11  -3    1.64    0.56
   7  11  -3    1.92    0.55
   6 -11  -3    0.22    0.44
  -6 -11   3    0.83    0.74
   6  11  -3    0.91    0.42
  -5 -11   3    4.79    0.86
   5 -11  -3    6.48    0.69
   5  11  -3    5.78    0.61
   5  11  -3    6.07    0.40
   4 -11  -3    6.12    0.63
  -4 -11   3    4.81    0.78
   4  11  -3    5.80    0.57
   4  11  -3    5.95    0.31
  -3 -11   3   32.21    1.53
   3 -11  -3   32.60    1.04
   3  11  -3   33.58    1.02
   3  11  -3   31.98    0.62
  -2 -11   3    8.00    0.97
   2 -11  -3    8.86    0.42
   2 -11  -3    8.61    0.66
   2  11  -3    8.59    0.36
   2  11  -3    9.46    0.55
  -1 -11   3   -0.17    0.66
   1 -11  -3    0.59    0.33
   1  11  -3    0.21    0.23
  -1  11   3    0.19    0.28
   1  11  -3    0.03    0.19
  -1  11   3    0.52    0.27
   0 -11   3    6.67    0.81
   0 -11  -3    6.44    0.59
   0  11  -3    7.40    0.43
   0  11  -3    6.14    0.46
   0  11   3    6.07    0.61
   0  11   3    7.53    0.49
  -1 -11  -3    3.72    0.44
   1 -11   3    3.16    0.56
  -1  11  -3    3.81    0.33
   1  11   3    2.60    0.54
  -1  11  -3    2.75    0.39
   1  11   3    3.20    0.34
   2 -11   3   10.21    0.89
  -2 -11  -3   10.67    0.64
  -2  11  -3    9.52    0.44
   2  11   3   10.42    0.54
   2  11   3   10.15    0.89
  -2  11  -3   10.51    0.69
   3 -11   3   51.62    1.82
  -3 -11  -3   50.83    1.34
   3  11   3   51.08    1.20
  -3  11  -3   49.44    1.05
  -3  11  -3   50.81    1.60
   3  11   3   52.84    1.95
   4 -11   3    0.67    0.47
  -4 -11  -3    0.33    0.37
  -4  11  -3    0.42    0.27
  -4  11  -3    0.53    0.48
   4  11   3    0.41    0.26
   4  11   3    0.72    0.70
  -5 -11  -3    1.00    0.41
   5 -11   3    0.07    0.47
   5  11   3    0.76    0.30
   5  11   3    0.26    0.73
  -5  11  -3    0.05    0.55
  -6 -11  -3    0.61    0.43
   6 -11   3   -0.13    0.52
   6  11   3   -0.26    0.77
  -6  11  -3    0.17    0.50
   7 -11   3    0.10    0.54
   7  11   3   -0.39    0.78
  -7  11  -3    0.44    0.61
  -8  11  -3    1.75    0.71
   8  11   3    0.86    0.98
  10 -12  -3    1.09    0.69
  10  12  -3    1.89    0.71
  -9 -12   3    6.07    1.09
   9 -12  -3    4.56    0.83
   9  12  -3    3.80    0.75
  -8 -12   3    3.21    0.84
   8 -12  -3    3.03    0.74
   8  12  -3    1.74    0.57
  -7 -12   3    6.61    1.05
   7 -12  -3    5.47    0.78
   7  12  -3    5.71    0.71
  -6 -12   3    0.57    0.73
   6 -12  -3    0.22    0.45
   6  12  -3    0.19    0.39
   5 -12  -3   -0.16    0.45
  -5 -12   3   -0.25    0.74
   5  12  -3    0.21    0.19
   5  12  -3   -0.05    0.36
  -4 -12   3    9.56    1.14
   4 -12  -3   10.08    0.73
   4  12  -3   11.02    0.34
   4  12  -3   12.03    0.71
   3 -12  -3    0.36    0.40
  -3 -12   3    0.40    0.61
   3  12  -3   -0.03    0.12
   3  12  -3   -0.07    0.27
   2 -12  -3    0.56    0.38
   2 -12  -3    0.05    0.22
  -2 -12   3   -0.05    0.58
   2  12  -3   -0.12    0.21
   2  12  -3    0.10    0.17
  -2  12   3    0.53    0.33
  -1 -12   3   37.21    1.45
   1 -12  -3   34.65    1.03
  -1  12   3   36.64    0.99
   1  12  -3   35.43    0.92
   1  12  -3   35.89    0.81
   0 -12   3    3.04    0.63
   0 -12  -3    3.07    0.40
   0  12  -3    3.04    0.31
   0  12   3    2.81    0.43
   0  12  -3    3.02    0.34
   0  12   3    2.95    0.35
  -1 -12  -3   30.55    0.93
   1 -12   3   32.05    1.35
   1  12   3   29.76    0.86
   1  12   3   30.47    1.23
  -1  12  -3   30.17    0.97
  -1  12  -3   30.07    0.76
  -2 -12  -3   37.10    1.06
   2 -12   3   36.41    1.44
   2  12   3   34.95    0.95
  -2  12  -3   36.89    1.20
   2  12   3   35.69    1.49
  -2  12  -3   35.77    0.85
   3 -12   3    4.58    0.73
  -3 -12  -3    5.73    0.62
   3  12   3    4.93    0.81
   3  12   3    5.42    0.48
  -3  12  -3    4.82    0.43
  -4 -12  -3    8.67    0.71
   4 -12   3    8.62    0.92
   4  12   3    8.42    0.59
   4  12   3   10.21    1.13
  -4  12  -3    8.59    0.58
  -4  12  -3    8.04    0.88
  -5 -12  -3    5.65    0.62
   5 -12   3    5.65    0.81
   5  12   3    4.93    0.97
  -5  12  -3    3.77    0.70
   5  12   3    5.48    0.56
  -6 -12  -3    1.91    0.47
   6 -12   3    1.79    0.62
  -6  12  -3    0.64    0.59
   6  12   3    1.99    0.88
   7 -12   3    0.90    0.59
  -7  12  -3    0.93    0.70
   7  12   3   -0.33    0.85
   8  12   3   -1.75    0.81
  -8  12  -3    1.78    0.74
  10 -13  -3    3.13    0.86
  10  13  -3    2.25    0.71
   9 -13  -3   -0.67    0.54
  -9 -13   3    1.80    0.89
   9  13  -3    0.27    0.53
  -8 -13   3    2.35    0.89
   8 -13  -3    2.42    0.72
   8  13  -3    2.57    0.63
  -7 -13   3    0.31    0.74
   7 -13  -3    0.14    0.49
   7  13  -3    0.56    0.46
   6 -13  -3    0.06    0.50
  -6 -13   3   -0.32    0.64
   6  13  -3    0.44    0.42
   5 -13  -3   23.69    1.09
  -5 -13   3   20.80    1.41
   5  13  -3   19.57    0.94
  -4 -13   3    1.30    0.79
   4 -13  -3    2.64    0.51
   4  13  -3    2.38    0.44
  -3 -13   3   16.08    1.20
   3 -13  -3   16.88    0.83
   3  13  -3   17.63    0.78
  -2 -13   3   51.70    1.87
   2 -13  -3   53.79    1.24
   2 -13  -3   51.04    1.31
   2  13  -3   52.97    1.25
  -2  13   3   55.12    1.33
   2  13  -3   53.43    0.92
  -1 -13   3    1.18    0.66
   1 -13  -3   -0.02    0.33
   1 -13  -3   -0.27    0.26
   1  13  -3    0.32    0.23
   1  13  -3    0.17    0.17
  -1  13   3    0.55    0.31
   0 -13  -3   17.12    0.72
   0 -13   3   17.24    1.07
   0  13   3   17.13    0.87
   0  13  -3   16.53    0.62
   0  13  -3   17.60    0.65
   0  13   3   16.46    0.70
  -1 -13  -3    9.27    0.61
   1 -13   3   10.13    0.87
  -1  13  -3    9.80    0.62
  -1  13  -3   10.82    0.50
   1  13   3   10.12    0.55
   1  13   3   10.59    0.88
   2 -13   3    0.05    0.41
  -2 -13  -3    0.20    0.31
  -2  13  -3   -0.15    0.32
   2  13   3    0.30    0.24
   2  13   3    0.43    0.50
  -2  13  -3    0.32    0.22
   3 -13   3    1.87    0.53
  -3 -13  -3    0.87    0.39
   3 -13   3    1.62    0.51
   3  13   3    1.19    0.31
   3  13   3    1.75    0.68
  -3  13  -3    1.76    0.31
   4 -13   3   12.26    0.99
  -4 -13  -3   12.52    0.76
   4  13   3   13.25    1.27
   4  13   3   12.43    0.67
  -4  13  -3   11.72    0.68
   5 -13   3    1.51    0.58
  -5 -13  -3    2.23    0.46
   5  13   3    1.29    0.35
   5  13   3    2.27    0.82
  -5  13  -3    0.95    0.54
   6 -13   3    1.29    0.54
   6  13   3    0.40    0.88
  -6  13  -3    0.44    0.62
   7 -13   3    0.70    0.58
   7  13   3    0.40    1.01
  -7  13  -3    0.05    0.52
   8  13   3    3.96    1.25
  -8  13  -3    5.52    0.97
  10 -14  -3    0.39    0.66
  10  14  -3    0.67    0.60
  -9 -14   3    1.79    0.93
   9 -14  -3    0.50    0.65
   9  14  -3    0.15    0.54
  -8 -14   3    3.44    0.97
   8 -14  -3    1.66    0.69
   8  14  -3    2.32    0.64
   7 -14  -3    1.30    0.64
  -7 -14   3    2.06    0.79
   7  14  -3    1.27    0.53
   6 -14  -3    3.00    0.61
  -6 -14   3    2.52    0.91
   6  14  -3    2.44    0.52
  -5 -14   3   25.38    1.59
   5 -14  -3   25.76    1.22
   5  14  -3   25.98    1.10
  -4 -14   3   18.64    1.38
   4 -14  -3   19.78    0.97
   4  14  -3   19.39    0.88
  -3 -14   3   13.89    1.19
   3 -14  -3   13.98    0.78
   3  14  -3   13.34    0.68
   2 -14  -3    2.40    0.46
   2 -14  -3    2.57    0.34
  -2 -14   3    2.10    0.71
  -2  14   3    2.12    0.38
   2  14  -3    2.41    0.21
   2  14  -3    2.91    0.40
  -1 -14   3    0.30    0.59
   1 -14  -3   -0.01    0.29
   1 -14  -3   -0.27    0.31
   1  14  -3    0.54    0.19
  -1  14   3    0.13    0.27
   1  14  -3   -0.07    0.23
   0 -14   3   21.32    1.19
   0 -14  -3   20.44    0.78
   0  14   3   21.46    0.94
   0  14  -3   21.58    0.71
   0  14  -3   21.72    0.71
   0  14   3   21.63    0.81
   1 -14   3   14.66    1.01
  -1 -14  -3   16.19    0.71
  -1  14  -3   16.67    0.62
   1  14   3   16.16    0.68
  -1  14  -3   15.93    0.74
   1  14   3   15.68    1.03
  -2 -14  -3   35.74    1.05
   2 -14   3   38.82    1.53
   2  14   3   35.61    1.03
   2  14   3   37.08    1.56
  -2  14  -3   37.01    0.92
   3 -14   3   24.44    1.08
  -3 -14  -3   25.30    0.96
   3 -14   3   24.76    1.30
  -3  14  -3   25.75    0.79
   3  14   3   25.29    0.88
   3  14   3   26.05    1.55
   4 -14   3   -0.01    0.47
   4 -14   3   -0.11    0.41
  -4 -14  -3    0.31    0.38
  -4  14  -3    0.09    0.37
   4  14   3   -0.43    0.62
   4  14   3   -0.24    0.24
  -5 -14  -3    2.68    0.50
   5 -14   3    2.94    0.67
   5  14   3    2.27    0.86
  -5  14  -3    2.35    0.71
   5  14   3    2.90    0.44
   6 -14   3    0.68    0.52
  -6  14  -3   -0.30    0.52
   6  14   3   -0.15    0.80
   7 -14   3    0.37    0.63
   7  14   3   -0.56    0.97
  -7  14  -3    0.58    0.68
   8  14   3   -2.17    0.90
  -8  14  -3    1.69    0.78
 -10 -15   3    1.93    1.43
  10 -15  -3   -0.58    0.52
  10  15  -3    0.25    0.61
  -9 -15   3    1.40    0.91
   9 -15  -3    0.19    0.64
   9  15  -3    0.69    0.57
  -8 -15   3    0.21    0.82
   8 -15  -3   -0.35    0.59
   8  15  -3    0.23    0.50
   7 -15  -3    0.72    0.61
  -7 -15   3    0.75    0.85
   7  15  -3    0.15    0.46
   6 -15  -3    0.49    0.54
  -6 -15   3    0.23    0.70
   6  15  -3   -0.42    0.32
  -5 -15   3    9.35    1.24
   5 -15  -3    8.34    0.88
   5  15  -3    9.65    0.78
  -4 -15   3   61.31    2.27
   4 -15  -3   60.90    1.70
   4  15  -3   56.33    1.53
  -3 -15   3    1.37    0.75
   3 -15  -3    2.00    0.44
  -3  15   3    1.92    0.42
   3  15  -3    2.20    0.40
  -2 -15   3   53.04    1.91
   2 -15  -3   52.93    1.31
   2 -15  -3   53.07    1.39
   2  15  -3   52.36    0.89
  -2  15   3   52.48    1.35
   2  15  -3   51.88    1.31
   1 -15  -3    1.38    0.38
  -1 -15   3    1.43    0.72
   1 -15  -3    1.30    0.38
   1  15  -3    1.30    0.29
  -1  15   3    1.36    0.37
   1  15  -3    1.25    0.22
   0 -15  -3   48.77    1.23
   0 -15   3   52.24    1.86
   0  15   3   50.56    1.55
   0  15  -3   49.79    1.17
   0  15  -3   50.57    1.19
   0  15   3   51.11    1.29
   1 -15   3    1.12    0.54
  -1 -15  -3    0.95    0.35
  -1  15  -3    1.41    0.35
  -1  15  -3    0.68    0.25
   1  15   3    0.93    0.29
   1  15   3    0.57    0.47
   2 -15   3    0.42    0.38
   2 -15   3    0.27    0.49
  -2 -15  -3    0.79    0.36
  -2  15  -3    0.27    0.26
   2  15   3    0.17    0.53
   2  15   3    0.56    0.29
   3 -15   3    1.92    0.54
   3 -15   3    1.66    0.59
  -3 -15  -3    2.32    0.45
   3  15   3    2.17    0.38
   3  15   3    0.47    0.65
  -3  15  -3    1.93    0.34
   4 -15   3    2.64    0.66
   4 -15   3    3.60    0.66
  -4 -15  -3    3.67    0.51
   4  15   3    3.60    0.87
   4  15   3    2.64    0.40
  -4  15  -3    2.58    0.60
   5 -15   3    0.57    0.51
  -5 -15  -3    1.26    0.51
   5  15   3    0.40    0.31
  -5  15  -3    0.03    0.51
   5  15   3    0.63    0.76
   6 -15   3    0.36    0.51
  -6  15  -3   -0.68    0.56
   6  15   3   -0.54    0.75
   7  15   3    3.61    1.29
  -7  15  -3    3.70    0.82
  -8  15  -3    0.77    0.63
  10 -16  -3   -0.31    0.55
 -10 -16   3    0.52    0.91
  10  16  -3   -0.12    0.56
   9 -16  -3    3.29    0.85
  -9 -16   3    5.26    1.14
   9  16  -3    3.28    0.75
   8 -16  -3    9.05    1.11
  -8 -16   3    8.10    1.22
   8  16  -3    7.43    0.89
   7 -16  -3   -0.27    0.48
  -7 -16   3    0.17    0.73
   7  16  -3   -0.05    0.46
   6 -16  -3    1.60    0.55
  -6 -16   3    1.79    0.90
   6  16  -3    2.01    0.47
   5 -16  -3    0.41    0.52
  -5 -16   3    1.31    0.81
   5  16  -3    1.04    0.41
  -4 -16   3   28.15    1.65
   4 -16  -3   26.70    1.18
   4  16  -3   28.77    1.11
   3 -16  -3   -0.08    0.39
  -3 -16   3    0.50    0.73
   3 -16  -3   -0.45    0.16
   3  16  -3    0.13    0.31
  -3  16   3   -0.07    0.35
   2 -16  -3    3.02    0.45
   2 -16  -3    2.90    0.40
  -2 -16   3    2.92    0.77
   2  16  -3    2.64    0.41
   2  16  -3    2.78    0.23
  -2  16   3    3.22    0.48
   1 -16  -3   -0.17    0.31
   1 -16  -3    0.31    0.32
  -1 -16   3    1.17    0.66
   1  16  -3   -0.12    0.25
  -1  16   3    0.18    0.31
   1  16  -3    0.21    0.17
   0 -16  -3    1.09    0.35
   0 -16  -3    0.91    0.43
   0 -16   3    1.63    0.67
   0  16  -3    1.18    0.27
   0  16   3    0.86    0.33
   0  16  -3    0.66    0.26
  -1 -16  -3    0.40    0.34
   1 -16   3    1.03    0.61
  -1  16  -3   -0.11    0.29
   1  16   3    0.55    0.30
  -1  16  -3    0.32    0.25
   1  16   3    1.33    0.55
   2 -16   3    0.40    0.53
   2 -16   3   -0.09    0.31
  -2 -16  -3    0.28    0.35
   2  16   3    0.42    0.29
  -2  16  -3    0.21    0.27
   2  16   3    0.97    0.61
   3 -16   3    0.46    0.39
   3 -16   3    0.30    0.48
  -3 -16  -3    0.75    0.38
   3  16   3    0.39    0.64
  -3  16  -3   -0.02    0.27
   3  16   3    0.18    0.28
   4 -16   3    1.00    0.54
  -4 -16  -3    0.69    0.39
   4 -16   3    1.05    0.48
   4  16   3    0.50    0.69
   4  16   3    0.30    0.30
   5 -16   3    3.09    0.69
   5  16   3    2.66    0.44
  -5  16  -3    2.92    0.69
   5  16   3    2.44    1.02
   6 -16   3    1.43    0.60
   6  16   3    1.20    0.91
  -6  16  -3    1.25    0.67
   7  16   3    4.21    1.25
  -7  16  -3    5.64    1.00
  -8 -16  -3    3.50    0.91
  -8  16  -3    1.68    0.77
  10 -17  -3    0.96    0.75
 -10 -17   3    1.26    1.04
  10  17  -3    0.62    0.63
   9 -17  -3    1.07    0.67
  -9 -17   3    3.16    1.06
   9  17  -3    2.14    0.67
  -8 -17   3    0.83    0.95
   8 -17  -3   -0.04    0.62
   8  17  -3    0.84    0.53
  -7 -17   3   11.39    1.38
   7 -17  -3   10.78    1.11
   7  17  -3   11.59    0.98
  -6 -17   3    3.64    0.95
   6 -17  -3    4.89    0.79
   6  17  -3    4.17    0.61
   5 -17  -3    0.68    0.46
  -5 -17   3    0.07    0.87
   5  17  -3    0.27    0.38
  -4 -17   3    6.02    1.13
   4 -17  -3    5.35    0.66
  -4  17   3    6.90    0.70
   4  17  -3    6.60    0.62
   3 -17  -3    0.24    0.42
   3 -17  -3    0.17    0.22
  -3 -17   3    1.06    0.80
   3  17  -3    0.66    0.33
  -3  17   3    0.81    0.45
   2 -17  -3    0.70    0.37
   2 -17  -3    1.03    0.42
  -2 -17   3    1.68    0.77
   2  17  -3    0.91    0.31
  -2  17   3    1.06    0.40
   2  17  -3    1.10    0.16
   1 -17  -3    1.71    0.43
  -1 -17   3    1.52    0.71
   1 -17  -3    1.46    0.40
   1  17  -3    1.61    0.35
   1  17  -3    1.69    0.24
  -1  17   3    1.20    0.37
   0 -17  -3   44.26    1.51
   0 -17   3   44.90    1.74
   0 -17  -3   44.07    1.16
   0  17   3   44.36    1.26
   0  17  -3   45.62    1.10
   0  17  -3   43.21    1.15
  -1 -17  -3    6.91    0.61
   1 -17   3    7.05    0.89
  -1  17  -3    6.51    0.53
   1  17   3    7.13    0.59
   1  17   3    7.84    0.85
  -1  17  -3    6.80    0.59
  -2 -17  -3    9.33    0.66
   2 -17   3    8.55    0.70
   2 -17   3    8.86    0.96
   2  17   3    8.94    0.62
   2  17   3    9.87    1.03
  -2  17  -3    9.91    0.63
  -3 -17  -3    4.74    0.54
   3 -17   3    4.68    0.61
   3 -17   3    5.62    0.80
   3  17   3    4.47    0.87
   3  17   3    5.96    0.54
  -3  17  -3    3.37    0.42
  -4 -17  -3   -0.11    0.34
   4 -17   3    0.06    0.42
   4 -17   3    0.40    0.49
   4  17   3    0.53    0.31
   4  17   3    0.12    0.77
   5 -17   3    6.76    0.90
   5  17   3    6.84    0.66
   5  17   3    6.12    1.14
  -5  17  -3    6.96    0.95
   6 -17   3    0.25    0.52
   6  17   3   -1.19    0.82
  -6  17  -3    0.87    0.61
  -7 -17  -3    2.01    0.79
  -7  17  -3    0.07    0.65
  -8 -17  -3    4.54    1.00
  -8  17  -3    1.74    0.77
 -10 -18   3    0.67    1.02
   9 -18  -3   -0.27    0.58
  -9 -18   3    2.17    1.04
   9  18  -3    1.47    0.62
  -8 -18   3    0.83    0.95
   8 -18  -3    0.66    0.61
   8  18  -3   -0.09    0.51
   7 -18  -3   -0.05    0.52
  -7 -18   3    0.87    0.93
   7  18  -3    0.64    0.48
   6 -18  -3   14.99    1.15
  -6 -18   3   16.25    1.48
   6  18  -3   15.88    1.04
  -5 -18   3    0.45    0.81
   5 -18  -3   -0.01    0.47
   5  18  -3   -0.03    0.37
  -4 -18   3    0.06    0.80
   4 -18  -3    0.78    0.51
   4  18  -3    0.27    0.37
  -4  18   3   -0.62    0.38
   3 -18  -3    3.13    0.55
   3 -18  -3    2.63    0.34
  -3 -18   3    2.83    0.90
   3  18  -3    2.64    0.45
  -3  18   3    3.11    0.56
   2 -18  -3    6.19    0.64
   2 -18  -3    6.17    0.65
  -2 -18   3    4.61    0.96
  -2  18   3    5.95    0.63
   2  18  -3    6.49    0.60
   1 -18  -3    0.06    0.41
  -1 -18   3    0.16    0.69
   1 -18  -3    0.01    0.33
   1  18  -3   -0.07    0.18
  -1  18   3   -0.06    0.28
   1  18  -3    0.56    0.30
   0 -18   3   19.85    1.32
   0 -18  -3   20.30    0.81
   0 -18  -3   21.26    1.11
   0  18  -3   17.90    0.77
   0  18   3   18.69    0.84
   0  18  -3   20.94    0.74
  -1 -18  -3   25.14    0.86
   1 -18   3   25.12    1.36
  -1 -18  -3   25.79    1.34
  -1  18  -3   24.56    0.87
   1  18   3   26.17    0.97
  -1  18  -3   25.55    0.96
   2 -18   3    3.31    0.66
  -2 -18  -3    3.21    0.46
   2 -18   3    2.88    0.51
   2  18   3    2.39    0.71
  -2  18  -3    2.95    0.41
   2  18   3    3.26    0.45
   3 -18   3    4.07    0.75
  -3 -18  -3    3.99    0.50
   3 -18   3    2.99    0.56
   3  18   3    4.50    0.51
  -3  18  -3    3.25    0.42
   3  18   3    4.62    0.94
   4 -18   3    8.52    0.82
   4 -18   3    8.63    0.91
   4  18   3   10.12    1.26
   4  18   3    9.81    0.71
   5 -18   3    0.54    0.50
   5  18   3    0.52    0.34
  -5  18  -3    0.65    0.62
   5  18   3   -0.19    0.82
   6 -18   3    0.65    0.56
   6  18   3   -0.77    1.00
  -6  18  -3    1.13    0.63
  -7 -18  -3    2.62    0.93
  -7  18  -3    0.12    0.65
  -8 -18  -3   10.14    1.34
  -8  18  -3    2.64    0.80
  -9 -19   3    2.30    1.07
   9 -19  -3    0.08    0.68
   9  19  -3    1.32    0.64
  -8 -19   3    3.26    1.04
   8 -19  -3    2.36    0.79
   8  19  -3    2.38    0.68
  -7 -19   3    4.08    1.05
   7 -19  -3    4.19    0.85
   7  19  -3    3.35    0.68
   6 -19  -3    0.02    0.48
  -6 -19   3    0.56    0.80
   6  19  -3    0.13    0.41
  -5 -19   3    3.27    1.10
   5 -19  -3    1.64    0.58
  -5  19   3    1.70    0.58
   5  19  -3    1.32    0.43
  -4 -19   3    1.04    0.85
   4 -19  -3    0.40    0.42
  -4  19   3    0.79    0.50
   4  19  -3    0.32    0.37
   3 -19  -3    0.27    0.44
  -3 -19   3    0.09    0.77
  -3  19   3    0.22    0.39
   3  19  -3    0.45    0.33
   2 -19  -3    2.68    0.50
   2 -19  -3    3.03    0.52
  -2 -19   3    2.85    0.90
   2  19  -3    3.43    0.46
  -2  19   3    3.41    0.53
   1 -19  -3   31.59    1.06
  -1 -19   3   31.38    1.76
   1 -19  -3   31.63    1.24
   1  19  -3   32.06    1.07
  -1  19   3   30.63    1.12
   1  19  -3   31.01    0.79
   0 -19  -3   14.41    1.01
   0 -19  -3   14.77    0.76
   0 -19   3   13.68    1.22
   0  19  -3   14.25    0.63
   0  19   3   15.27    0.81
   0  19  -3   14.82    0.73
  -1 -19  -3    1.10    0.39
  -1 -19  -3    0.94    0.58
   1 -19   3    0.60    0.61
   1  19   3    0.65    0.33
  -1  19  -3    1.04    0.36
  -1  19  -3    1.17    0.33
   2 -19   3    1.09    0.62
  -2 -19  -3    1.46    0.40
   2 -19   3    1.35    0.44
  -2 -19  -3    0.84    0.66
  -2  19  -3    1.07    0.35
   2  19   3    0.84    0.34
  -3 -19  -3    0.80    0.37
   3 -19   3    0.65    0.49
   3 -19   3    0.86    0.46
  -3  19  -3    0.80    0.34
   3  19   3    0.74    0.34
   3  19   3    1.12    0.73
   4 -19   3    2.16    0.55
   4 -19   3    2.67    0.69
   4  19   3    2.63    0.44
   4  19   3    3.09    1.00
   5 -19   3    0.91    0.56
   5  19   3    0.46    0.36
  -5  19  -3    0.41    0.62
   5  19   3   -1.07    0.89
  -6 -19  -3    4.42    0.99
   6 -19   3    4.11    0.88
  -6  19  -3    3.18    0.75
  -7 -19  -3    3.90    1.05
  -7  19  -3    0.98    0.70
  -8  19  -3    1.21    0.77
  -9 -20   3    2.22    0.98
   9 -20  -3   -0.32    0.71
   9  20  -3    0.95    0.61
  -9  20   3    0.80    0.64
  -8 -20   3    4.93    1.26
   8 -20  -3    1.43    0.71
   8  20  -3    2.93    0.69
  -8  20   3    4.39    0.80
  -7 -20   3    1.70    1.02
   7 -20  -3    0.12    0.55
  -7  20   3    1.38    0.59
   7  20  -3    0.52    0.47
   6 -20  -3    3.14    0.70
  -6 -20   3    3.50    1.03
   6  20  -3    3.49    0.64
  -6  20   3    3.40    0.69
  -5 -20   3    3.18    1.02
   5 -20  -3    4.66    0.76
   5  20  -3    4.03    0.60
  -5  20   3    3.57    0.64
   4 -20  -3    4.09    0.65
  -4 -20   3    3.56    1.02
  -4  20   3    3.04    0.61
   4  20  -3    3.08    0.53
  -3 -20   3    2.14    0.92
   3 -20  -3    2.28    0.55
   3  20  -3    2.81    0.46
  -3  20   3    1.97    0.51
   2 -20  -3    1.73    0.49
  -2 -20   3    2.54    1.01
   2 -20  -3    2.06    0.49
   2  20  -3    1.83    0.38
  -2  20   3    1.59    0.44
   1 -20  -3    8.68    0.82
   1 -20  -3    8.43    0.66
  -1 -20   3    9.42    1.21
  -1  20   3    7.72    0.66
   1  20  -3    8.58    0.43
   1  20  -3    8.38    0.65
   0 -20  -3   11.23    0.95
   0 -20   3   12.27    1.33
   0 -20  -3   10.77    0.67
   0  20   3   12.12    0.77
   0  20  -3   10.61    0.68
   0  20  -3   11.50    0.60
   1 -20   3    7.28    0.98
  -1 -20  -3    8.65    1.02
  -1 -20  -3    7.74    0.64
  -1  20  -3    7.63    0.66
  -1  20  -3    8.14    0.60
   1  20   3    9.11    0.69
   2 -20   3    3.64    0.76
  -2 -20  -3    2.17    0.70
   2 -20   3    3.69    0.54
  -2 -20  -3    3.43    0.45
   2  20   3    2.53    0.45
  -2  20  -3    3.20    0.43
  -3 -20  -3    0.00    0.54
   3 -20   3    0.05    0.51
   3 -20   3    0.06    0.41
   3  20   3    0.33    0.31
  -3  20  -3    0.00    0.32
  -4 -20  -3    2.04    0.79
   4 -20   3    1.21    0.57
   4 -20   3    1.42    0.51
   4  20   3    1.51    0.41
  -5 -20  -3    2.91    0.88
   5 -20   3    1.46    0.62
  -5  20  -3    2.49    0.78
   5  20   3    2.00    0.45
  -6 -20  -3    4.84    1.09
  -6  20  -3    3.11    0.77
  -7 -20  -3    5.20    1.08
  -7  20  -3    2.03    0.73
  -9 -21   3    2.70    1.18
   9  21  -3    1.80    0.65
  -9  21   3    1.02    0.66
  -8 -21   3    0.89    0.95
   8 -21  -3   -0.72    0.61
   8  21  -3    0.24    0.53
  -8  21   3   -0.09    0.56
   7 -21  -3    1.69    0.70
  -7 -21   3    0.89    0.92
   7  21  -3    1.15    0.55
  -7  21   3    2.03    0.67
  -6 -21   3    0.69    0.91
   6 -21  -3    0.60    0.53
   6  21  -3    1.29    0.47
  -6  21   3    0.90    0.56
   5 -21  -3    0.35    0.52
  -5 -21   3   -0.81    0.83
   5  21  -3    0.42    0.42
  -5  21   3    0.40    0.51
  -4 -21   3    0.74    0.90
   4 -21  -3    0.12    0.43
  -4  21   3    0.36    0.50
   4  21  -3    0.19    0.36
  -3 -21   3    2.81    1.00
   3 -21  -3    2.56    0.57
   3  21  -3    1.23    0.40
  -3  21   3    2.00    0.56
   2 -21  -3    1.88    0.46
   2 -21  -3    2.41    0.54
  -2 -21   3    2.61    1.03
  -2  21   3    1.90    0.50
   2  21  -3    2.02    0.44
   1 -21  -3   33.82    1.36
   1 -21  -3   32.02    1.10
  -1 -21   3   33.11    1.76
   1  21  -3   34.42    0.84
   1  21  -3   33.26    1.14
  -1  21   3   33.10    1.24
   0 -21  -3   16.33    1.15
   0 -21  -3   17.23    0.82
   0 -21   3   16.66    1.48
   0  21  -3   18.99    0.73
   0  21   3   17.77    0.91
   0  21  -3   17.17    0.85
  -1 -21  -3    0.87    0.56
  -1 -21  -3    1.38    0.39
   1 -21   3    0.73    0.71
   1  21   3    0.46    0.36
  -1  21  -3    0.27    0.34
  -1  21  -3    1.15    0.37
   2 -21   3    0.80    0.38
  -2 -21  -3    0.30    0.60
   2 -21   3    0.13    0.59
  -2 -21  -3    0.35    0.34
  -2  21  -3    0.31    0.33
   2  21   3    0.23    0.32
   3 -21   3   -0.16    0.35
   3 -21   3    0.18    0.52
  -3 -21  -3    0.53    0.66
   3  21   3    0.17    0.32
  -3  21  -3   -0.16    0.32
   4 -21   3    0.39    0.45
   4 -21   3   -0.11    0.50
  -4 -21  -3    1.25    0.73
   4  21   3    0.16    0.34
  -5 -21  -3    5.99    1.07
   5 -21   3    7.09    0.98
   5  21   3    5.99    0.64
  -5  21  -3    6.36    0.98
  -6 -21  -3    2.14    0.87
  -6  21  -3    1.62    0.65
  -7 -21  -3    4.94    1.06
  -7  21  -3    0.85    0.68
  -9 -22   3    1.50    1.13
   9 -22  -3    0.28    0.74
   9  22  -3    0.07    0.51
  -9  22   3   -0.79    0.59
   8 -22  -3    0.89    0.65
  -8 -22   3    1.37    1.17
  -8  22   3    0.58    0.62
   8  22  -3    0.02    0.51
   7 -22  -3    0.72    0.68
  -7 -22   3    2.15    1.18
   7  22  -3    1.65    0.55
  -7  22   3    1.07    0.61
   6 -22  -3   -0.16    0.49
  -6 -22   3    2.02    1.12
   6  22  -3    0.31    0.44
  -6  22   3    0.18    0.51
  -5 -22   3    4.20    1.14
   5 -22  -3    4.05    0.70
   5  22  -3    3.86    0.60
  -5  22   3    3.69    0.71
  -4 -22   3    0.11    1.00
   4 -22  -3    0.43    0.50
  -4  22   3    0.42    0.44
   4  22  -3   -0.40    0.34
   3 -22  -3    7.67    0.78
  -3 -22   3    7.20    1.26
  -3  22   3    6.53    0.77
   3  22  -3    5.82    0.61
   2 -22  -3   21.07    0.98
   2 -22  -3   21.02    1.08
  -2 -22   3   20.65    1.63
   2  22  -3   22.42    1.00
  -2  22   3   21.83    1.10
  -1 -22   3    2.10    0.85
   1 -22  -3    2.34    0.47
   1 -22  -3    2.63    0.60
   1  22  -3    3.17    0.33
   1  22  -3    2.51    0.47
  -1  22   3    2.35    0.49
   0 -22  -3   20.29    0.86
   0 -22   3   20.60    1.58
   0 -22  -3   20.82    1.23
   0  22  -3   19.93    0.76
   0  22  -3   20.69    0.92
   0  22   3   19.03    0.93
  -1 -22  -3   -0.01    0.60
  -1 -22  -3    0.23    0.36
   1 -22   3    1.19    0.67
  -1  22  -3    0.16    0.33
   1  22   3    0.67    0.38
  -1  22  -3   -0.17    0.32
  -2 -22  -3    0.17    0.33
   2 -22   3    0.13    0.59
  -2 -22  -3    0.30    0.55
   2 -22   3    0.21    0.37
  -2  22  -3   -0.06    0.32
   2  22   3    0.39    0.36
  -3 -22  -3    3.02    0.83
   3 -22   3    3.07    0.59
   3 -22   3    2.21    0.65
  -3  22  -3    2.29    0.46
   3  22   3    2.94    0.50
   4 -22   3    6.24    0.93
  -4 -22  -3    5.42    0.96
   4 -22   3    5.36    0.79
   4  22   3    4.93    0.59
  -5 -22  -3   13.38    1.42
   5 -22   3   12.56    1.16
   5  22   3   11.37    0.86
  -5  22  -3   15.48    1.28
  -6 -22  -3    1.77    0.89
  -6  22  -3    0.58    0.66
  -7 -22  -3    4.14    1.02
  -7  22  -3    1.72    0.75
  -9 -23   3    0.88    1.04
   9 -23  -3    0.64    0.72
   9  23  -3    1.20    0.63
  -9  23   3   -0.48    0.59
  -8 -23   3    2.38    1.13
   8 -23  -3    1.56    0.77
   8  23  -3    1.44    0.62
  -8  23   3    0.58    0.63
  -7 -23   3    5.20    1.29
   7 -23  -3    7.10    1.04
  -7  23   3    4.03    0.79
   7  23  -3    4.16    0.70
  -6 -23   3    0.20    0.94
   6 -23  -3   -0.49    0.46
   6  23  -3    0.20    0.46
  -6  23   3    0.43    0.56
   5 -23  -3   26.56    1.31
  -5 -23   3   24.20    1.87
   5  23  -3   28.43    1.28
  -5  23   3   27.46    1.37
  -4 -23   3   11.43    1.51
   4 -23  -3   10.28    0.85
   4  23  -3   10.65    0.85
  -4  23   3   10.84    0.99
   3 -23  -3    1.75    0.54
  -3 -23   3    1.81    0.96
   3  23  -3    1.30    0.45
  -3  23   3    1.41    0.53
   2 -23  -3    1.02    0.43
   2 -23  -3    1.72    0.58
  -2 -23   3    1.72    0.95
   2  23  -3    1.68    0.44
  -2  23   3    1.66    0.49
   1 -23  -3   -0.09    0.34
   1 -23  -3    0.29    0.50
  -1 -23   3    0.63    0.80
  -1  23   3    0.27    0.37
   1  23  -3    0.50    0.37
   0 -23   3   19.05    1.57
   0 -23  -3   19.08    1.25
   0 -23  -3   17.75    0.82
   0  23  -3   17.65    0.88
   0  23   3   18.60    0.99
   0  23  -3   17.69    0.74
   1 -23   3    1.98    0.78
  -1 -23  -3    1.92    0.41
  -1 -23  -3    1.23    0.68
  -1  23  -3    1.43    0.40
  -1  23  -3    1.64    0.41
   1  23   3    2.37    0.47
   2 -23   3    9.69    1.09
   2 -23   3    9.83    0.75
  -2 -23  -3    9.84    1.18
   2  23   3    9.97    0.76
  -2  23  -3   10.29    0.72
  -3 -23  -3    1.23    0.74
   3 -23   3    0.05    0.54
   3 -23   3    1.01    0.47
   3  23   3    0.92    0.39
  -3  23  -3    0.56    0.38
   4 -23   3    2.32    0.63
   4 -23   3    2.32    0.70
  -4 -23  -3    2.38    0.80
   4  23   3    2.51    0.50
  -5 -23  -3   11.31    1.50
   5 -23   3    9.51    1.10
   5  23   3    8.83    0.82
  -5  23  -3    7.96    1.00
  -6 -23  -3    2.63    0.93
  -6  23  -3    2.28    0.82
  -7 -23  -3    4.11    1.07
  -7  23  -3    0.99    0.72
  -9 -24   3    0.47    1.18
   9 -24  -3    0.20    0.80
   9  24  -3    0.67    0.57
  -9  24   3   -1.62    0.56
  -8 -24   3    1.04    1.19
   8 -24  -3    0.09    0.72
  -8  24   3    0.36    0.64
   8  24  -3   -0.18    0.50
   7 -24  -3    2.36    0.80
  -7 -24   3    3.45    1.35
  -7  24   3    2.03    0.67
   7  24  -3    2.93    0.64
   6 -24  -3    6.00    0.86
  -6 -24   3    5.94    1.42
  -6  24   3    4.77    0.79
   6  24  -3    3.90    0.69
   5 -24  -3    3.78    1.23
  -5 -24   3    3.64    1.18
  -5  24   3    3.27    0.66
   5  24  -3    4.17    0.66
  -4 -24   3    5.96    1.31
   4 -24  -3    4.66    0.73
   4  24  -3    5.17    0.68
  -4  24   3    4.98    0.72
   3 -24  -3    1.61    0.52
  -3 -24   3    1.32    0.93
  -3  24   3    1.44    0.56
   3  24  -3    1.31    0.40
  -2 -24   3    1.60    0.96
   2 -24  -3    0.70    0.51
   2 -24  -3   -0.11    0.41
   2  24  -3    0.39    0.37
  -2  24   3    0.51    0.40
  -1 -24   3   12.92    1.37
   1 -24  -3   14.51    0.82
   1 -24  -3   14.48    1.04
  -1  24   3   13.39    0.94
   1  24  -3   15.02    0.86
   0 -24   3   -0.14    0.71
   0 -24  -3    0.06    0.52
   0 -24  -3   -0.04    0.34
   0  24  -3    0.26    0.24
   0  24  -3    0.18    0.35
   0  24   3   -0.18    0.39
  -1 -24  -3    1.67    0.42
   1 -24   3    2.02    0.84
  -1 -24  -3    2.62    0.74
   1  24   3    1.28    0.43
  -1  24  -3    1.63    0.43
  -1  24  -3    1.97    0.42
   2 -24   3    1.25    0.68
  -2 -24  -3    0.99    0.69
   2  24   3    1.51    0.45
  -2  24  -3    1.56    0.43
   3 -24   3    4.40    0.82
   3 -24   3    4.34    0.65
  -3 -24  -3    4.00    0.87
  -3  24  -3    3.36    0.52
   3  24   3    3.03    0.54
   4 -24   3    1.59    0.65
  -4 -24  -3    1.42    0.76
   4  24   3    1.82    0.46
  -5 -24  -3    3.51    0.97
   5  24   3    2.16    0.52
  -5  24  -3    2.07    0.73
  -6 -24  -3    2.23    0.94
  -6  24  -3    0.45    0.69
  -7  24  -3    0.47    0.66
  -9 -25   3    0.65    1.24
   9  25  -3    0.30    0.73
  -9  25   3   -0.77    0.61
  -8 -25   3    3.42    1.28
   8 -25  -3    2.41    0.85
   8  25  -3    2.85    0.70
  -8  25   3    1.16    0.70
   7 -25  -3    1.66    0.75
  -7 -25   3    2.03    1.20
   7  25  -3    1.11    0.58
  -7  25   3    0.70    0.64
   6 -25  -3    3.99    0.79
  -6 -25   3    5.86    1.35
  -6  25   3    4.07    0.77
   6  25  -3    4.56    0.71
   5 -25  -3    0.82    0.54
  -5 -25   3    0.61    1.12
   5  25  -3    0.65    0.46
  -5  25   3    0.67    0.50
  -4 -25   3   12.54    1.59
   4 -25  -3   10.78    0.93
  -4  25   3   10.43    1.04
   4  25  -3   10.77    0.83
  -3 -25   3   10.63    1.47
   3 -25  -3    9.44    0.81
  -3  25   3    7.35    0.81
   3  25  -3    8.35    0.78
   2 -25  -3    1.08    0.46
   2 -25  -3    0.58    0.54
  -2 -25   3    1.51    1.05
  -2  25   3    1.74    0.51
   2  25  -3    0.37    0.37
   1 -25  -3   18.03    1.14
   1 -25  -3   16.40    0.86
  -1 -25   3   17.71    1.67
   1  25  -3   16.82    0.92
  -1  25   3   17.23    1.04
   0 -25  -3    1.78    0.43
   0 -25   3    1.36    0.80
   0 -25  -3    2.43    0.69
   0  25   3    2.08    0.48
   0  25  -3    1.50    0.41
   0  25  -3    1.91    0.34
  -1 -25  -3    2.85    0.72
   1 -25   3    3.35    0.91
  -1  25  -3    3.02    0.50
  -1  25  -3    3.31    0.49
   1  25   3    2.42    0.48
  -2 -25  -3    3.43    0.79
   2 -25   3    3.38    0.80
   2  25   3    4.29    0.60
  -2  25  -3    3.69    0.53
   3 -25   3    1.64    0.67
   3 -25   3    2.33    0.55
  -3 -25  -3    2.75    0.81
   3  25   3    1.77    0.46
  -3  25  -3    1.75    0.46
   4 -25   3    9.26    1.07
  -4 -25  -3    9.08    1.25
   4  25   3    9.87    0.81
  -5 -25  -3    2.17    0.92
  -5  25  -3    0.95    0.60
   5  25   3    0.78    0.46
  -6 -25  -3    3.39    0.97
  -6  25  -3    3.45    0.84
  -7 -25  -3    3.64    0.99
  -7  25  -3    2.60    0.82
  -8 -26   3    2.89    1.39
   8 -26  -3    1.61    0.78
   8  26  -3    1.80    0.67
  -8  26   3    0.06    0.64
  -7 -26   3    1.97    1.33
   7 -26  -3    0.35    0.67
   7  26  -3    0.65    0.56
  -7  26   3    0.64    0.64
   6 -26  -3   -0.83    0.57
  -6 -26   3    0.05    1.21
   6  26  -3    0.06    0.48
  -6  26   3   -0.59    0.57
  -5 -26   3   -0.01    1.04
   5 -26  -3   -0.08    0.55
   5  26  -3    0.52    0.45
  -5  26   3   -0.72    0.45
  -4 -26   3    4.17    1.21
   4 -26  -3    3.67    0.68
  -4  26   3    3.03    0.66
   4  26  -3    2.29    0.55
   3 -26  -3    0.13    0.42
  -3 -26   3    0.09    0.95
   3  26  -3    0.65    0.41
  -3  26   3   -0.46    0.39
   2 -26  -3    8.05    0.75
  -2 -26   3    8.60    1.38
  -2  26   3    8.63    0.84
   2  26  -3    8.74    0.76
   1 -26  -3    0.46    0.54
   1 -26  -3   -0.20    0.32
  -1 -26   3   -0.90    0.88
   1  26  -3    0.12    0.36
  -1  26   3   -0.02    0.41
   0 -26  -3    2.13    0.70
   0 -26   3    2.17    0.93
   0 -26  -3    1.77    0.43
   0  26  -3    2.06    0.44
   0  26   3    1.39    0.50
   0  26  -3    1.98    0.47
   1 -26   3    1.45    0.83
  -1 -26  -3    0.72    0.71
  -1  26  -3    0.17    0.33
  -1  26  -3    0.81    0.38
   1  26   3    0.32    0.39
  -2 -26  -3    0.69    0.63
   2 -26   3    1.52    0.74
  -2  26  -3    1.00    0.46
  -2  26  -3    0.60    0.41
   2  26   3    0.53    0.43
  -3 -26  -3    2.49    0.87
   3 -26   3    1.76    0.69
  -3  26  -3    1.79    0.48
   3  26   3    1.54    0.46
   4 -26   3    0.31    0.57
  -4 -26  -3    1.07    0.85
  -4  26  -3    1.16    0.62
   4  26   3    0.54    0.39
  -5 -26  -3   12.86    1.51
  -5  26  -3   12.94    1.22
   5  26   3   11.41    0.91
  -6 -26  -3    4.84    1.09
  -6  26  -3    4.23    0.93
  -7 -26  -3    4.59    1.56
  -7  26  -3    1.08    0.80
  -8 -27   3    0.38    1.12
   8 -27  -3   -0.36    0.57
  -8  27   3   -0.66    0.60
   8  27  -3    0.34    0.54
  -7 -27   3    0.49    1.14
   7 -27  -3    0.70    0.71
  -7  27   3   -0.34    0.62
   7  27  -3   -0.25    0.50
   6 -27  -3    0.89    0.66
  -6 -27   3    0.94    1.14
  -6  27   3   -0.15    0.61
   6  27  -3    0.27    0.51
   5 -27  -3    4.76    0.83
  -5 -27   3    6.60    1.53
   5  27  -3    5.70    0.77
  -5  27   3    4.71    0.77
  -4 -27   3    0.60    1.07
   4 -27  -3    0.29    0.49
  -4  27   3   -0.02    0.45
   4  27  -3   -0.13    0.41
   3 -27  -3    1.31    0.52
  -3 -27   3    1.56    1.05
   3  27  -3    0.92    0.45
  -3  27   3    1.76    0.60
   2 -27  -3    0.34    0.43
  -2 -27   3    0.25    1.02
   2  27  -3    0.34    0.39
  -2  27   3   -0.22    0.44
   1 -27  -3    1.68    0.62
   1 -27  -3    1.18    0.44
  -1 -27   3    0.64    0.88
  -1  27   3    1.45    0.53
   1  27  -3    1.64    0.49
   0 -27   3    0.83    0.79
   0 -27  -3    1.48    0.66
   0 -27  -3    0.33    0.35
   0  27   3    1.81    0.51
   0  27  -3    0.82    0.42
  -1 -27  -3   19.73    1.48
   1 -27   3   17.00    1.51
  -1  27  -3   20.23    0.92
   1  27   3   18.58    1.08
  -1  27  -3   18.90    0.98
  -2 -27  -3    0.90    0.66
   2 -27   3    0.22    0.65
   2  27   3    0.39    0.42
  -2  27  -3   -0.03    0.39
  -2  27  -3    0.73    0.43
   3 -27   3    2.09    0.73
  -3 -27  -3    4.23    0.98
  -3  27  -3    2.60    0.64
  -3  27  -3    2.28    0.50
   3  27   3    1.73    0.50
   4 -27   3   -0.15    0.54
  -4 -27  -3    1.30    0.83
   4  27   3    0.30    0.41
  -4  27  -3   -0.25    0.48
  -5 -27  -3    2.04    0.96
   5  27   3    0.90    0.48
  -5  27  -3    0.87    0.61
  -6 -27  -3    3.26    1.03
  -6  27  -3    0.60    0.67
  -8 -28   3    0.71    1.35
   8 -28  -3    1.33    0.75
  -8  28   3    1.46    0.76
   8  28  -3    1.04    0.60
  -7 -28   3    3.22    1.32
   7 -28  -3    1.43    0.77
  -7  28   3    0.66    0.66
   7  28  -3    1.30    0.58
  -6 -28   3    1.26    1.32
   6 -28  -3   -0.26    0.54
   6  28  -3   -0.17    0.47
  -6  28   3   -1.14    0.56
   5 -28  -3   -0.17    0.56
  -5 -28   3    1.02    1.15
  -5  28   3   -0.36    0.57
   5  28  -3    0.24    0.47
   4 -28  -3    3.72    0.67
  -4 -28   3    2.94    1.29
   4  28  -3    2.59    0.58
  -4  28   3    2.76    0.68
  -3 -28   3    1.31    1.17
   3 -28  -3    0.64    0.49
   3  28  -3    0.57    0.40
  -3  28   3    1.38    0.58
   2 -28  -3    1.14    0.47
  -2 -28   3    1.11    0.95
  -2  28   3    1.64    0.58
   2  28  -3    0.98    0.46
   1 -28  -3    0.59    0.42
  -1 -28   3    2.41    0.98
   1 -28  -3    1.18    0.65
   1  28  -3    0.35    0.42
  -1  28   3    1.60    0.54
   0 -28   3   10.15    1.35
   0 -28  -3   11.44    1.16
   0  28   3    9.89    0.84
   0  28  -3   12.39    0.86
  -1 -28  -3    2.99    0.82
   1 -28   3    1.87    0.88
  -1  28  -3    2.42    0.44
  -1  28  -3    2.36    0.53
   1  28   3    1.86    0.54
  -2 -28  -3   11.48    1.26
   2 -28   3   10.99    1.25
  -2  28  -3   11.28    0.86
  -2  28  -3   12.26    0.92
   2  28   3   12.18    0.94
  -3 -28  -3    2.14    0.93
   3 -28   3    1.40    0.73
  -3  28  -3    2.06    0.53
   3  28   3    2.44    0.56
  -3  28  -3    2.99    0.63
   4 -28   3    3.26    0.87
  -4 -28  -3    4.11    0.99
  -4  28  -3    2.34    0.65
   4  28   3    1.59    0.51
  -5 -28  -3    2.64    1.00
  -5  28  -3    2.67    0.75
   5  28   3    2.24    0.56
  -6 -28  -3    2.34    0.90
  -6  28  -3    0.37    0.62
  -8 -29   3    0.91    1.25
   8 -29  -3    2.16    0.77
  -8  29   3    0.56    0.71
   8  29  -3    1.35    0.62
   7 -29  -3    0.36    0.69
  -7 -29   3    0.77    1.36
   7  29  -3    0.61    0.57
  -7  29   3   -0.54    0.61
  -6 -29   3    1.73    1.38
   6 -29  -3   -0.08    0.60
  -6  29   3    0.39    0.67
   6  29  -3   -0.42    0.48
   5 -29  -3    4.15    0.80
  -5 -29   3    5.37    1.41
   5  29  -3    5.59    0.80
  -5  29   3    4.85    0.85
   4 -29  -3    0.86    0.55
  -4 -29   3   -1.37    1.01
   4  29  -3    0.35    0.47
  -4  29   3    0.26    0.56
  -3 -29   3   -0.78    1.01
   3 -29  -3    1.27    0.50
  -3  29   3    0.26    0.47
   3  29  -3    1.22    0.47
   2 -29  -3    1.73    0.50
  -2 -29   3    2.26    1.05
   2  29  -3    1.79    0.51
  -2  29   3    1.14    0.51
  -1 -29   3    0.23    0.90
   1 -29  -3   -0.42    0.36
   1 -29  -3    0.13    0.64
  -1  29   3   -0.34    0.44
   1  29  -3    0.11    0.41
   0 -29  -3    9.75    1.13
   0 -29   3    6.88    1.22
   0  29  -3    8.89    0.81
   0  29   3    7.54    0.85
   1 -29   3    0.00    0.69
  -1 -29  -3    0.98    0.71
   1  29   3    1.01    0.50
  -1  29  -3    0.23    0.39
  -2 -29  -3    0.67    0.69
   2 -29   3   -0.28    0.67
  -2  29  -3    1.11    0.47
  -2  29  -3    0.02    0.43
   2  29   3    0.55    0.46
  -3 -29  -3    1.03    0.83
   3 -29   3   -0.29    0.60
  -3  29  -3    0.17    0.45
  -3  29  -3    0.07    0.42
   3  29   3    0.26    0.41
  -4 -29  -3    0.79    0.87
   4  29   3    0.45    0.44
  -4  29  -3    0.34    0.53
  -5 -29  -3    3.68    1.04
  -5  29  -3    2.22    0.73
   5  29   3    2.63    0.59
  -6 -29  -3    3.77    1.08
  -6  29  -3    0.69    0.63
  -8  30   3   -1.69    0.55
   7 -30  -3    0.63    0.71
  -7 -30   3    2.16    1.33
   7  30  -3    1.82    0.63
  -7  30   3    0.76    0.71
  -6 -30   3    3.60    1.42
   6 -30  -3    2.48    0.79
   6  30  -3    3.13    0.69
  -6  30   3    2.67    0.75
   5 -30  -3    0.21    0.58
  -5 -30   3    2.32    1.42
  -5  30   3    0.47    0.61
   5  30  -3    0.71    0.53
  -4 -30   3    0.81    1.25
   4 -30  -3    1.92    0.64
   4  30  -3    1.39    0.53
  -4  30   3    0.67    0.57
  -3 -30   3    1.77    1.27
   3 -30  -3    1.76    0.58
  -3  30   3    1.22    0.62
   3  30  -3    0.70    0.47
   2 -30  -3    4.70    0.66
  -2 -30   3    5.88    1.27
   2  30  -3    3.75    0.59
  -2  30   3    4.11    0.72
   1 -30  -3    3.37    0.60
   1 -30  -3    2.67    0.75
  -1 -30   3    3.26    1.11
  -1  30   3    2.61    0.67
   1  30  -3    2.41    0.57
   0 -30  -3    2.07    0.74
   0 -30   3    1.13    0.86
   0  30   3    1.73    0.54
   0  30  -3    0.63    0.45
   1 -30   3   -0.62    0.77
  -1 -30  -3    1.10    0.74
   1  30   3    0.37    0.47
  -1  30  -3   -0.11    0.41
  -2 -30  -3    0.79    0.70
   2 -30   3    0.94    0.76
  -2  30  -3    0.45    0.46
  -2  30  -3    0.70    0.45
   2  30   3    0.36    0.48
  -3 -30  -3    1.71    0.82
   3 -30   3    1.94    0.77
   3  30   3    2.65    0.61
  -3  30  -3    1.90    0.59
  -3  30  -3    2.18    0.58
  -4 -30  -3    3.27    1.06
  -4  30  -3    2.63    0.68
   4  30   3    1.98    0.55
  -5 -30  -3    2.61    1.01
  -5  30  -3    1.63    0.71
   5  30   3    1.29    0.54
  -6  30  -3    0.90    0.64
  -7 -31   3   -0.52    1.38
   7 -31  -3    0.61    0.69
   7  31  -3    0.20    0.54
  -7  31   3   -0.37    0.63
  -6 -31   3    0.56    1.40
   6 -31  -3   -0.06    0.63
  -6  31   3   -0.38    0.64
   6  31  -3    0.96    0.55
   5 -31  -3    1.48    0.71
  -5 -31   3    0.08    1.23
  -5  31   3    1.29    0.67
   5  31  -3    1.51    0.60
   4 -31  -3    3.19    0.70
  -4 -31   3    4.19    1.39
  -4  31   3    1.99    0.70
   4  31  -3    2.27    0.61
   3 -31  -3    7.46    0.86
  -3 -31   3    6.89    1.47
  -3  31   3    6.12    0.86
   3  31  -3    5.87    0.77
  -2 -31   3    1.22    1.20
   2 -31  -3   -0.22    0.40
  -2  31   3   -0.11    0.50
   2  31  -3    0.02    0.45
  -1 -31   3   10.16    1.49
   1  31  -3   10.09    0.90
  -1  31   3   10.20    1.05
   0 -31   3    5.11    1.19
   0 -31  -3    5.43    0.96
   0  31  -3    4.64    0.64
   0  31   3    4.71    0.75
  -1 -31  -3   13.72    1.39
   1 -31   3   11.18    1.30
  -1  31  -3   12.14    0.99
   1  31   3   11.81    0.95
  -2 -31  -3    2.38    0.82
   2 -31   3    0.52    0.77
  -2  31  -3    1.90    0.55
  -2  31  -3    0.82    0.49
   2  31   3    1.74    0.56
   3 -31   3    7.30    1.10
  -3 -31  -3    6.63    1.15
   3  31   3    6.61    0.81
  -3  31  -3    5.94    0.80
  -3  31  -3    6.49    0.80
  -4 -31  -3    0.56    0.79
   4  31   3    0.65    0.46
  -4  31  -3   -0.32    0.50
  -5 -31  -3    1.02    0.82
   5  31   3    0.04    0.45
  -5  31  -3    0.22    0.57
  -6  31  -3    0.51    0.63
  -7 -32   3    0.67    1.51
   7 -32  -3    0.52    0.70
   7  32  -3    0.25    0.53
  -7  32   3   -0.85    0.63
   6 -32  -3   -0.26    0.59
  -6 -32   3    0.59    1.34
   6  32  -3    0.68    0.56
  -6  32   3   -0.97    0.60
   5 -32  -3    0.75    0.64
  -5 -32   3    1.18    1.41
   5  32  -3    0.72    0.53
  -5  32   3    0.36    0.66
   4 -32  -3    4.45    0.79
  -4 -32   3    3.51    1.52
   4  32  -3    4.33    0.72
  -4  32   3    4.07    0.84
   3 -32  -3   -0.04    0.49
  -3 -32   3   -0.40    1.23
   3  32  -3    0.04    0.45
  -3  32   3   -0.07    0.56
  -2 -32   3    2.50    1.19
   2 -32  -3    3.57    0.63
   2  32  -3    3.33    0.60
  -2  32   3    4.72    0.79
  -1 -32   3   -1.43    0.98
  -1  32   3   -0.12    0.51
   1  32  -3    0.00    0.44
   0 -32  -3   10.92    1.26
   0 -32   3   10.47    1.46
   0  32   3    9.03    0.96
   0  32  -3   10.87    0.92
   1 -32   3   -0.05    0.86
  -1 -32  -3    1.73    0.84
   1  32   3    0.77    0.54
  -1  32  -3    0.26    0.45
   2 -32   3    0.22    0.73
  -2 -32  -3    0.92    0.83
  -2  32  -3   -0.06    0.42
   2  32   3    0.42    0.48
  -3 -32  -3    2.25    0.94
   3 -32   3    0.55    0.73
  -3  32  -3    1.92    0.59
   3  32   3    1.40    0.55
  -4 -32  -3    1.53    0.98
   4  32   3    0.60    0.48
  -4  32  -3    0.85    0.56
  -5 -32  -3    4.37    1.21
  -5  32  -3    3.51    0.77
   5  32   3    2.17    0.61
   7 -33  -3    1.27    0.71
  -7  33   3    0.36    0.68
   7  33  -3    0.74    0.62
  -6 -33   3    2.94    1.46
   6 -33  -3    2.42    0.79
   6  33  -3    1.74    0.65
  -6  33   3    1.57    0.75
  -5 -33   3   -0.59    1.40
   5 -33  -3   -0.11    0.59
  -5  33   3    0.08    0.65
   5  33  -3    1.05    0.56
  -4 -33   3    6.34    1.56
   4 -33  -3    5.54    0.84
   4  33  -3    4.22    0.71
  -4  33   3    4.50    0.87
   3 -33  -3   10.16    0.95
  -3 -33   3   11.09    1.70
  -3  33   3   12.77    1.22
   3  33  -3   10.69    0.97
  -2 -33   3    0.48    1.21
   2  33  -3    0.41    0.49
  -2  33   3    0.06    0.57
  -1 -33   3    0.46    1.07
  -1  33   3    1.11    0.60
   1  33  -3    1.38    0.55
   0 -33   3   -0.25    0.95
   0 -33  -3    0.77    0.78
   0  33   3    0.29    0.46
   0  33  -3   -0.06    0.45
   1 -33   3   -0.99    0.83
  -1 -33  -3    1.38    0.85
  -1  33  -3    0.03    0.46
   1  33   3    0.02    0.50
  -2 -33  -3    1.38    0.87
   2 -33   3    0.60    0.81
  -2  33  -3    0.17    0.48
   2  33   3    0.61    0.51
  -3 -33  -3    7.32    1.28
   3  33   3    4.89    0.76
  -4 -33  -3    4.89    1.18
  -4  33  -3    3.61    0.73
   4  33   3    3.11    0.66
  -5 -33  -3    3.40    1.05
  -5  33  -3    1.51    0.65
   5  33   3    1.16    0.54
   6 -34  -3    1.02    0.71
  -6 -34   3    0.76    1.52
  -6  34   3   -0.12    0.66
   6  34  -3    0.20    0.57
   5 -34  -3    0.03    0.58
  -5 -34   3    0.81    1.36
   5  34  -3    0.13    0.49
  -5  34   3    0.53    0.72
  -4 -34   3    3.50    1.43
   4 -34  -3    2.79    0.72
   4  34  -3    2.12    0.61
  -4  34   3    1.74    0.73
   3 -34  -3    0.63    0.55
  -3 -34   3    0.06    1.30
   3  34  -3    1.57    0.58
  -3  34   3    0.16    0.57
  -2 -34   3    0.04    1.26
  -2  34   3    1.75    0.66
   2  34  -3    0.90    0.52
  -1 -34   3   -0.31    1.09
   1  34  -3   -0.16    0.46
  -1  34   3   -0.16    0.53
   0 -34   3    1.24    1.10
   0 -34  -3    2.12    1.01
   0  34   3    1.32    0.64
   0  34  -3    1.81    0.59
  -1 -34  -3    0.96    0.82
   1 -34   3   -0.34    0.85
  -1  34  -3    1.47    0.55
   1  34   3    1.11    0.57
  -2 -34  -3    2.39    0.96
   2 -34   3    1.09    0.86
   2  34   3    1.42    0.59
  -2  34  -3    1.72    0.59
  -3 -34  -3    4.87    1.18
   3  34   3    3.10    0.67
  -4 -34  -3    2.77    1.00
   4  34   3    1.87    0.59
  -4  34  -3    2.85    0.69
  -5 -34  -3    2.22    1.05
  -5  34  -3    0.63    0.58
  -6 -35   3   -0.26    1.57
   6 -35  -3    1.19    0.71
   6  35  -3    0.70    0.57
  -6  35   3    0.06    0.68
  -5 -35   3    1.66    1.59
   5 -35  -3    1.75    0.67
   5  35  -3    1.90    0.65
  -5  35   3    1.17    0.74
   4 -35  -3    0.15    0.56
  -4 -35   3   -0.76    1.48
  -4  35   3    0.67    0.68
   4  35  -3    0.09    0.53
  -3 -35   3    3.74    1.39
  -3  35   3    3.89    0.83
   3  35  -3    6.08    0.81
  -2 -35   3    0.24    1.13
   2  35  -3    1.31    0.56
  -2  35   3    1.27    0.61
  -1 -35   3   -0.89    0.97
   1  35  -3    0.14    0.47
  -1  35   3    0.34    0.51
   0 -35   3   -0.69    1.03
   0  35  -3    1.00    0.54
   0  35   3    0.30    0.56
  -1 -35  -3    3.17    1.03
   1 -35   3    0.49    0.90
  -1  35  -3    2.31    0.62
   1  35   3    1.97    0.64
   2 -35   3    4.07    1.08
  -2 -35  -3    6.98    1.26
  -2  35  -3    4.72    0.77
   2  35   3    3.75    0.73
  -3 -35  -3    3.16    0.98
   3  35   3    1.98    0.65
  -4 -35  -3    4.87    1.25
   4  35   3    4.53    0.76
   6 -36  -3   -0.22    0.58
  -6  36   3   -1.81    0.56
   6  36  -3    0.30    0.92
   5 -36  -3    0.11    0.57
  -5 -36   3   -0.45    1.57
  -5  36   3    0.32    0.73
   5  36  -3    1.10    0.57
   4 -36  -3   -0.02    0.51
  -4 -36   3    0.68    1.34
  -4  36   3    0.73    0.63
   4  36  -3    0.44    0.50
  -3 -36   3    1.03    1.46
  -3  36   3   -0.51    0.58
   3  36  -3    0.41    0.54
  -2 -36   3    4.53    1.57
  -2  36   3    4.15    0.81
   2  36  -3    5.71    0.82
  -1 -36   3    1.32    1.25
  -1  36   3    1.75    0.66
   1  36  -3    1.30    0.58
   0 -36   3    1.27    1.16
   0  36  -3    3.04    0.68
   0  36   3    1.94    0.70
  -1 -36  -3    0.38    0.89
   1 -36   3   -0.95    0.84
   1  36   3    0.55    0.58
  -1  36  -3   -0.18    0.51
  -2 -36  -3   -0.03    0.76
  -2  36  -3   -0.27    0.49
   2  36   3    0.18    0.51
  -3 -36  -3    1.31    0.99
   3  36   3   -0.03    0.52
  -4 -36  -3    1.96    1.02
   4  36   3    0.52    0.50
  -5 -37   3   -0.42    1.42
   5 -37  -3   -0.05    0.59
   5  37  -3   -0.24    0.50
  -5  37   3   -1.11    0.61
  -4 -37   3   -0.42    1.30
   4  37  -3    1.32    0.58
  -4  37   3    0.80    0.70
  -3 -37   3    6.90    1.66
  -3  37   3    6.87    1.02
   3  37  -3    6.68    0.87
  -2 -37   3   -1.07    1.14
  -2  37   3   -0.26    0.59
   2  37  -3    0.13    0.48
  -1 -37   3   -1.35    1.19
   1  37  -3    0.58    0.52
  -1  37   3    0.02    0.59
   0 -37   3   -1.88    0.98
   0  37   3    0.06    0.55
   0  37  -3    0.70    0.54
   1 -37   3   -0.46    0.90
  -1 -37  -3   -0.02    0.92
  -1  37  -3    0.60    0.56
   1  37   3    1.25    0.63
  -2 -37  -3    0.91    1.00
   2  37   3    0.89    0.59
  -3 -37  -3    1.57    1.06
   3  37   3    0.11    0.52
  -4 -37  -3    1.56    1.07
   4  37   3    1.20    0.59
  -5 -38   3   -0.83    1.48
  -5  38   3    0.04    0.70
   5  38  -3    0.65    0.59
  -4 -38   3   -1.68    1.47
   4  38  -3    1.67    0.60
  -4  38   3    0.02    0.62
  -3 -38   3    0.77    1.54
  -3  38   3    2.39    0.81
   3  38  -3    2.87    0.70
  -2 -38   3    1.78    1.48
   2  38  -3    2.00    0.62
  -2  38   3    2.77    0.77
  -1 -38   3   -0.30    1.11
  -1  38   3    1.21    0.70
   1  38  -3    1.49    0.59
   0 -38   3   -1.86    0.99
   0  38  -3    1.41    0.61
   0  38   3    0.03    0.55
   1  38   3   -0.36    0.51
  -1  38  -3   -0.32    0.49
  -2 -38  -3   -0.16    1.01
   2  38   3    1.02    0.63
  -2  38  -3   -0.13    0.55
  -3 -38  -3    4.95    1.24
   3  38   3    4.75    0.79
  -4 -39   3   -3.38    1.44
   4  39  -3    0.15    0.53
  -4  39   3   -0.50    0.61
  -3 -39   3   -2.34    1.37
  -3  39   3   -0.39    0.59
   3  39  -3    0.52    0.56
  -2 -39   3    1.51    1.31
   2  39  -3    4.02    0.74
  -2  39   3    3.49    0.80
  -1 -39   3   -0.29    1.27
  -1  39   3    1.22    0.71
   1  39  -3    1.40    0.65
   0  39  -3   -0.30    0.51
   0  39   3    0.06    0.59
   1  39   3   -0.48    0.56
  -1  39  -3   -0.27    0.54
  -2 -39  -3    1.22    1.15
   2  39   3    3.24    0.82
  -2  39  -3    3.36    0.81
  -3 -39  -3    0.59    1.13
   3  39   3    0.24    0.56
  -4 -40   3   -0.61    1.71
  -4  40   3    2.85    1.36
   3  40  -3   -0.53    0.45
  -3  40   3   -1.06    0.58
  -2 -40   3   -3.30    1.25
   2  40  -3    0.68    0.59
  -2  40   3   -0.30    0.59
  -1 -40   3   -2.55    1.19
  -1  40   3    0.26    0.68
   1  40  -3   -0.17    0.51
   0 -40   3   -1.32    1.11
   0  40   3    1.63    0.68
   0  40  -3    1.15    0.62
  -1  40  -3    1.12    0.61
   1  40   3    1.30    0.68
   2  40   3    0.07    0.57
  -3 -41   3   -2.83    1.56
  -3  41   3    1.94    1.21
   3  41  -3    2.23    0.74
   2  41  -3    0.58    0.59
  -2  41   3    0.22    0.65
   1  41  -3    0.22    0.54
  -1  41   3    1.01    0.69
   0 -41   3   -2.82    1.06
   0  41  -3    1.10    0.63
   0  41   3    1.71    0.75
   1  41   3   -0.58    0.55
  -1  41  -3    0.26    0.63
   2  42  -3    1.90    0.90
   1  42  -3   -0.45    0.52
   0  42  -3   -1.01    0.56
   9   0  -4    6.43    0.80
   8   0  -4    2.82    0.58
  -7   0   4   31.64    1.33
   7   0  -4   31.18    1.27
   7   0  -4   30.15    1.23
   6   0  -4    0.53    0.42
  -6   0   4    0.42    0.49
   6   0  -4    0.75    0.41
   5   0  -4    1.70    0.40
   5   0  -4    1.26    0.35
  -5   0   4    1.32    0.47
   4   0  -4    9.29    0.63
  -4   0   4    9.83    0.76
   4   0  -4    9.42    0.64
   3   0  -4   34.56    0.96
  -3   0   4   33.32    1.09
   3   0  -4   35.19    1.00
  -2   0   4   30.51    0.99
   2   0  -4   29.74    0.93
   2   0  -4   30.74    0.80
  -1   0   4   28.94    1.01
   1   0  -4   26.93    0.85
   0   0   4   15.14    0.81
   0   0  -4   16.08    0.74
  -1   0  -4    4.92    0.51
   1   0   4    4.54    0.61
   2   0   4    1.07    0.45
  -2   0  -4    1.00    0.35
   3   0   4   34.94    1.53
  -3   0  -4   34.72    1.23
  -4   0  -4    8.88    0.79
   4   0   4    9.86    1.06
  -5   0  -4   23.97    1.22
   5   0   4   22.23    1.44
  -6   0  -4   24.56    1.31
   6   0   4   25.32    1.60
  -7   0  -4    1.12    0.60
   7   0   4    1.29    0.72
  -8   0  -4    4.89    0.87
   8   0   4    4.38    1.05
  10  -1  -4    0.93    0.57
   9  -1  -4    0.42    0.50
   9   1  -4    0.34    0.48
   8  -1  -4    0.51    0.46
   8   1  -4   -0.24    0.39
  -7  -1   4    0.93    0.53
   7  -1  -4    0.29    0.42
   7   1  -4    0.09    0.39
   7   1  -4    0.58    0.40
   6  -1  -4   26.54    1.06
  -6  -1   4   27.17    1.23
   6  -1  -4   26.67    1.10
   6   1  -4   29.13    1.14
   6   1  -4   25.25    1.07
  -6   1   4   27.33    1.14
   5  -1  -4    6.28    0.63
   5  -1  -4    6.48    0.65
  -5  -1   4    6.51    0.77
   5   1  -4    5.47    0.56
  -5   1   4    7.09    0.68
   5   1  -4    5.67    0.57
   4  -1  -4    1.02    0.35
  -4  -1   4    0.41    0.46
   4  -1  -4    2.10    0.37
   4   1  -4    1.01    0.35
  -4   1   4    1.38    0.44
   4   1  -4    0.35    0.30
  -3  -1   4    0.72    0.44
   3  -1  -4    0.70    0.32
   3  -1  -4    0.44    0.33
  -3   1   4    0.91    0.39
   3   1  -4    1.10    0.37
   3   1  -4    0.38    0.27
   2  -1  -4   -0.07    0.37
  -2  -1   4    0.97    0.40
   2   1  -4   -0.11    0.35
   2   1  -4   -0.09    0.22
  -2   1   4    0.53    0.30
   1  -1  -4    0.18    0.31
  -1  -1   4    1.29    0.37
  -1   1   4    0.95    0.30
   1   1  -4    0.76    0.20
   1   1  -4    0.67    0.33
   0  -1  -4  221.49    3.65
   0  -1   4  230.98    4.59
   0   1   4  226.90    4.55
   0   1  -4  228.40    3.65
  -1  -1  -4    0.17    0.30
   1  -1   4    0.50    0.39
   1   1   4    0.86    0.40
  -1   1  -4    0.44    0.31
   2  -1   4    2.74    0.55
  -2  -1  -4    2.63    0.46
  -2   1  -4    2.95    0.45
   2   1   4    2.77    0.54
  -3  -1  -4   11.11    0.80
   3  -1   4    9.52    0.90
  -3   1  -4    8.83    0.72
   3   1   4    8.93    0.97
  -4  -1  -4   12.60    0.93
   4  -1   4   12.05    1.06
   4   1   4   11.49    1.13
  -4   1  -4   10.88    0.91
  -5  -1  -4    2.91    0.62
   5  -1   4    3.96    0.83
   5   1   4    3.40    0.79
  -5   1  -4    3.68    0.68
   6  -1   4    0.71    0.66
  -6  -1  -4    0.90    0.50
  -6   1  -4    0.75    0.49
   6   1   4    1.27    0.70
   7  -1   4    0.65    0.73
  -7  -1  -4    0.60    0.55
  -7   1  -4    0.24    0.54
   7   1   4    0.26    0.66
   8  -1   4    0.97    0.72
  -8  -1  -4    2.00    0.65
  -8   1  -4    1.18    0.60
   8   1   4    2.19    0.90
  10  -2  -4   -0.37    0.49
   9  -2  -4    0.25    0.49
   9   2  -4    0.08    0.46
   8  -2  -4    0.20    0.46
   8   2  -4   -0.51    0.46
   8   2  -4    0.02    0.39
   7  -2  -4    0.85    0.48
  -7  -2   4    1.88    0.58
   7   2  -4    0.83    0.48
   7   2  -4    1.07    0.43
  -6  -2   4    0.81    0.57
   6  -2  -4    1.07    0.49
  -6   2   4    1.45    0.48
   6   2  -4    0.65    0.42
  -5  -2   4   53.57    1.65
   5  -2  -4   51.89    1.39
   5  -2  -4   50.88    1.39
  -5   2   4   54.54    1.46
   5   2  -4   53.08    1.40
   5   2  -4   52.71    1.33
   4  -2  -4    8.51    0.57
  -4  -2   4    7.70    0.77
   4  -2  -4    8.10    0.65
  -4   2   4    8.11    0.65
   4   2  -4    8.42    0.57
   4   2  -4    7.71    0.57
   3  -2  -4   35.67    1.03
  -3  -2   4   38.51    1.28
   3   2  -4   38.11    1.01
  -3   2   4   37.88    1.04
   3   2  -4   37.82    1.01
  -2  -2   4   43.22    1.32
   2  -2  -4   44.71    1.13
   2   2  -4   43.64    0.98
   2   2  -4   43.36    1.08
  -2   2   4   44.86    1.16
   1  -2  -4   -0.11    0.31
  -1  -2   4    0.20    0.33
   1   2  -4    0.06    0.28
   1   2  -4   -0.13    0.17
  -1   2   4    0.11    0.26
   0  -2   4   43.31    1.38
   0  -2  -4   45.16    1.17
   0   2   4   44.71    1.37
   0   2  -4   43.86    1.12
  -1  -2  -4    1.23    0.34
   1  -2   4    1.79    0.46
   1   2   4    1.48    0.15
  -1   2  -4    1.54    0.38
   1   2   4    1.90    0.49
  -2  -2  -4    8.99    0.68
   2  -2   4    9.39    0.80
   2   2   4    9.02    0.23
   2   2   4    8.71    0.79
  -2   2  -4    9.12    0.66
   3  -2   4    1.14    0.53
  -3  -2  -4    0.47    0.41
   3   2   4    1.37    0.54
  -3   2  -4    0.57    0.43
   3   2   4    0.65    0.14
   4  -2   4    0.29    0.48
  -4  -2  -4    0.41    0.40
  -4   2  -4    0.16    0.46
   4   2   4    0.14    0.51
   5  -2   4    7.90    0.98
  -5  -2  -4    7.76    0.83
   5   2   4    7.00    1.01
  -5   2  -4    6.61    0.83
   6  -2   4    0.22    0.63
  -6  -2  -4    1.07    0.55
  -6   2  -4    0.97    0.57
   6   2   4    0.40    0.69
   7  -2   4    0.96    0.76
  -7  -2  -4    0.07    0.52
   7   2   4    0.39    0.67
  -7   2  -4    1.36    0.63
   8  -2   4    0.95    0.75
  -8  -2  -4    1.64    0.61
  -8   2  -4    0.57    0.56
   8   2   4    0.88    0.72
  10  -3  -4   -0.14    0.50
   9  -3  -4    0.17    0.51
   8  -3  -4   -0.55    0.40
   8   3  -4   -0.19    0.47
   8   3  -4    0.45    0.42
  -7  -3   4    1.01    0.56
   7  -3  -4   -0.27    0.40
   7   3  -4    0.15    0.38
   7   3  -4    0.11    0.37
  -6  -3   4   31.34    1.42
   6  -3  -4   29.27    1.20
  -6   3   4   29.83    1.15
   6   3  -4   31.47    1.13
   6   3  -4   31.97    1.17
   5  -3  -4   40.22    1.23
  -5  -3   4   41.05    1.52
  -5   3   4   40.21    1.18
   5   3  -4   40.91    1.13
   5   3  -4   40.72    1.25
   4  -3  -4  114.78    2.21
  -4  -3   4  112.52    2.64
   4   3  -4  112.79    2.07
  -4   3   4  113.36    2.29
   4   3  -4  108.44    2.10
  -3  -3   4    2.01    0.55
   3  -3  -4    1.68    0.39
  -3   3   4    2.04    0.31
   3   3  -4    1.50    0.32
   3   3  -4    2.03    0.38
   2  -3  -4    5.84    0.56
  -2  -3   4    7.12    0.76
   2   3  -4    5.74    0.45
   2   3  -4    5.60    0.51
  -2   3   4    6.72    0.48
  -1  -3   4    0.22    0.37
   1  -3  -4    0.15    0.32
  -1   3   4    0.14    0.28
   1   3  -4    0.36    0.19
   1   3  -4    0.08    0.30
   0  -3  -4   44.57    1.20
   0  -3   4   45.85    1.45
   0   3  -4   46.01    0.75
   0   3   4   45.92    0.84
   0   3  -4   45.18    1.14
   0   3   4   45.62    1.36
   1  -3   4    0.74    0.40
  -1  -3  -4    0.05    0.29
  -1   3  -4    0.60    0.30
   1   3   4    0.63    0.38
   1   3   4    0.55    0.12
  -2  -3  -4    4.14    0.53
   2  -3   4    3.80    0.60
   2   3   4    3.86    0.60
  -2   3  -4    4.12    0.55
   2   3   4    4.08    0.22
  -3  -3  -4   37.96    1.28
   3  -3   4   37.43    1.57
  -3   3  -4   39.35    1.34
   3   3   4   38.68    0.72
   3   3   4   38.40    1.60
   4  -3   4   -0.24    0.46
  -4  -3  -4   -0.17    0.36
  -4   3  -4   -0.50    0.44
   4   3   4    0.19    0.53
  -5  -3  -4    0.05    0.44
   5  -3   4    0.21    0.55
  -5   3  -4    0.62    0.52
   5   3   4    0.34    0.63
  -6  -3  -4    0.54    0.51
   6  -3   4    1.01    0.66
   6   3   4    1.26    0.74
  -6   3  -4    1.16    0.59
   7  -3   4    3.37    0.91
  -7  -3  -4    3.23    0.68
  -7   3  -4    2.62    0.74
   7   3   4    2.66    0.84
   8  -3   4    2.66    0.89
  -8  -3  -4    2.90    0.68
   8   3   4    2.66    0.98
  -8   3  -4    1.94    0.69
  10  -4  -4    2.94    0.73
   9  -4  -4   -0.11    0.50
   9   4  -4   -0.75    0.48
   8  -4  -4    0.38    0.46
  -8  -4   4    0.94    0.61
   8   4  -4   -0.43    0.46
   8   4  -4   -0.16    0.38
  -7  -4   4    6.12    0.83
   7  -4  -4    5.73    0.73
   7   4  -4    5.83    0.70
   7   4  -4    5.18    0.59
   6  -4  -4   12.18    0.85
  -6  -4   4   12.85    1.05
   6   4  -4   13.48    0.91
   6   4  -4   12.37    0.79
  -5  -4   4   12.91    1.00
   5  -4  -4   13.80    0.78
  -5   4   4   12.21    0.68
   5   4  -4   12.79    0.69
   5   4  -4   12.22    0.72
   4  -4  -4    2.62    0.48
  -4  -4   4    3.36    0.62
   4   4  -4    2.49    0.37
  -4   4   4    2.83    0.33
   4   4  -4    2.72    0.43
   3  -4  -4  176.63    3.01
  -3  -4   4  174.44    3.70
   3   4  -4  175.29    2.84
  -3   4   4  172.61    3.24
   3   4  -4  177.99    2.85
   2  -4  -4    0.29    0.35
  -2  -4   4    1.02    0.52
   2   4  -4    0.18    0.31
   2   4  -4    0.76    0.24
  -2   4   4    0.60    0.23
  -1  -4   4    1.41    0.45
   1  -4  -4    1.09    0.36
  -1   4   4    1.22    0.32
   1   4  -4    0.57    0.30
   1   4  -4    1.05    0.21
   0  -4   4   11.69    0.79
   0  -4  -4   10.48    0.64
   0   4   4   10.33    0.40
   0   4   4   11.08    0.68
   0   4  -4   10.62    0.33
   0   4  -4    9.48    0.62
   1  -4   4   27.87    1.17
  -1  -4  -4   29.53    0.99
   1   4   4   28.34    0.58
  -1   4  -4   26.61    0.94
   1   4   4   27.43    1.14
   2  -4   4    8.96    0.80
  -2  -4  -4    7.96    0.62
   2   4   4    8.72    0.81
  -2   4  -4    8.95    0.65
   2   4   4    8.69    0.32
  -3  -4  -4    6.52    0.64
   3  -4   4    6.81    0.88
  -3   4  -4    5.25    0.63
   3   4   4    6.31    0.32
   3   4   4    6.62    0.85
   4  -4   4    0.35    0.56
  -4  -4  -4    0.66    0.43
   4   4   4    0.88    0.59
  -4   4  -4    0.91    0.52
   5  -4   4   14.12    1.17
  -5  -4  -4   16.82    1.03
   5   4   4   14.39    1.27
  -5   4  -4   13.92    1.01
   6  -4   4    3.30    0.77
  -6  -4  -4    3.37    0.64
   6   4   4    2.02    0.77
  -6   4  -4    3.80    0.70
   7  -4   4    2.13    0.85
  -7  -4  -4    1.70    0.59
   7   4   4    2.26    0.85
  -7   4  -4    1.96    0.63
   8  -4   4    1.62    0.80
  -8  -4  -4    2.94    0.67
  -8   4  -4    3.94    0.84
   8   4   4    3.55    1.09
  10  -5  -4    7.55    0.98
   9  -5  -4    0.03    0.54
   9   5  -4    0.38    0.58
   8  -5  -4    2.67    0.61
  -8  -5   4    3.44    0.79
   8   5  -4    3.36    0.56
   8   5  -4    3.36    0.64
  -7  -5   4    0.13    0.58
   7  -5  -4   -0.20    0.45
   7   5  -4    0.11    0.33
   7   5  -4    0.24    0.44
  -6  -5   4   16.34    1.17
   6  -5  -4   16.06    1.00
   6   5  -4   16.73    0.97
   6   5  -4   16.20    0.83
  -5  -5   4   85.11    2.36
   5  -5  -4   82.65    1.92
   5   5  -4   81.42    1.70
  -5   5   4   81.68    1.77
   5   5  -4   86.64    1.88
  -4  -5   4    7.07    0.87
   4  -5  -4    8.25    0.69
   4   5  -4    7.57    0.52
  -4   5   4    7.16    0.37
   4   5  -4    7.72    0.61
   3  -5  -4  137.54    2.51
  -3  -5   4  139.03    3.11
   3   5  -4  141.34    2.32
   3   5  -4  135.35    2.34
  -3   5   4  134.15    2.53
  -2  -5   4   38.40    1.39
   2  -5  -4   37.73    1.06
   2   5  -4   38.89    0.96
   2   5  -4   38.24    0.91
  -2   5   4   39.29    0.99
   1  -5  -4   30.71    0.96
  -1  -5   4   30.25    1.19
   1   5  -4   30.31    0.85
   1   5  -4   30.94    0.72
  -1   5   4   32.30    0.98
   0  -5  -4    1.35    0.43
   0  -5   4    2.19    0.48
   0   5   4    1.90    0.24
   0   5   4    1.93    0.42
   0   5  -4    0.86    0.33
   0   5  -4    1.57    0.18
   1  -5   4    0.56    0.40
  -1  -5  -4   -0.12    0.33
   1   5   4    0.27    0.13
   1   5   4    0.21    0.35
  -1   5  -4   -0.07    0.31
   2  -5   4    2.94    0.54
  -2  -5  -4    2.17    0.40
  -2   5  -4    3.50    0.52
   2   5   4    3.12    0.26
   2   5   4    2.74    0.56
  -3  -5  -4    1.44    0.46
   3  -5   4    1.83    0.55
  -3   5  -4    1.55    0.44
   3   5   4    2.08    0.60
   3   5   4    1.75    0.22
  -4  -5  -4    1.08    0.43
   4  -5   4    0.84    0.57
   4   5   4    0.79    0.58
  -4   5  -4    0.94    0.50
   5  -5   4   17.93    1.35
  -5  -5  -4   18.73    1.05
   5   5   4   16.42    1.32
  -5   5  -4   17.59    1.17
   6  -5   4    1.35    0.63
  -6  -5  -4    1.77    0.55
  -6   5  -4    1.31    0.64
   6   5   4    1.80    0.84
   7  -5   4    1.95    0.73
  -7  -5  -4    2.06    0.63
  -7   5  -4    2.06    0.74
   7   5   4    1.68    0.80
   8  -5   4    5.57    1.11
  -8  -5  -4    6.29    0.86
  -8   5  -4    5.46    0.92
   8   5   4    4.10    1.09
  10  -6  -4    1.79    0.67
   9  -6  -4    0.20    0.50
   9   6  -4   -0.84    0.51
   8  -6  -4    3.62    0.71
  -8  -6   4    3.48    0.80
   8   6  -4    3.26    0.62
   7  -6  -4   -0.04    0.45
  -7  -6   4    0.58    0.62
   7   6  -4   -0.35    0.32
   7   6  -4    0.10    0.43
  -6  -6   4    2.48    0.72
   6  -6  -4    2.39    0.59
   6   6  -4    1.57    0.41
   6   6  -4    2.17    0.47
  -5  -6   4   47.62    1.75
   5  -6  -4   45.49    1.41
   5   6  -4   49.17    1.35
  -5   6   4   47.38    1.08
   5   6  -4   46.49    1.17
  -4  -6   4    2.62    0.65
   4  -6  -4    3.19    0.51
   4   6  -4    2.52    0.35
   4   6  -4    2.72    0.38
  -3  -6   4    5.17    0.75
   3  -6  -4    5.94    0.64
   3   6  -4    6.60    0.53
   3   6  -4    5.82    0.44
  -3   6   4    5.54    0.24
  -2  -6   4    2.99    0.64
   2  -6  -4    3.36    0.44
   2   6  -4    2.25    0.35
  -2   6   4    2.61    0.32
   2   6  -4    2.69    0.33
   1  -6  -4    0.25    0.35
  -1  -6   4    0.81    0.51
   1   6  -4    0.13    0.19
  -1   6   4   -0.41    0.25
   1   6  -4    0.13    0.27
   0  -6  -4   -0.12    0.34
   0  -6   4    0.45    0.41
   0   6  -4    0.18    0.15
   0   6   4    0.23    0.18
   0   6   4    0.10    0.30
   0   6  -4   -0.28    0.26
  -1  -6  -4    2.01    0.42
   1  -6   4    2.48    0.56
   1   6   4    2.04    0.22
  -1   6  -4    1.98    0.40
   1   6   4    1.98    0.46
  -2  -6  -4    0.44    0.35
   2  -6   4    0.35    0.39
   2   6   4    0.18    0.16
   2   6   4    0.51    0.45
  -2   6  -4    0.30    0.37
  -3  -6  -4   22.90    1.01
   3  -6   4   21.13    1.21
   3   6   4   21.92    1.38
   3   6   4   23.18    0.62
  -3   6  -4   22.40    1.08
   4  -6   4    1.59    0.55
  -4  -6  -4    1.33    0.47
  -4   6  -4    1.94    0.54
   4   6   4    1.23    0.69
   5  -6   4    5.94    0.90
  -5  -6  -4    5.75    0.71
  -5   6  -4    4.38    0.71
   5   6   4    6.64    1.03
   6  -6   4    5.64    0.92
  -6  -6  -4    5.83    0.77
   6   6   4    5.81    1.02
  -6   6  -4    4.54    0.78
   7  -6   4    0.60    0.66
  -7  -6  -4    1.20    0.52
  -7   6  -4   -0.54    0.54
   7   6   4   -0.19    0.76
   8  -6   4    0.87    0.71
  -8   6  -4    1.82    0.71
   8   6   4   -0.11    0.73
  10  -7  -4   -0.08    0.56
  10   7  -4   -0.65    0.57
   9  -7  -4    1.92    0.66
   9   7  -4    1.60    0.64
  -8  -7   4    6.42    0.99
   8  -7  -4    6.56    0.82
   8   7  -4    7.16    0.80
  -7  -7   4   12.81    1.20
   7  -7  -4    9.80    0.93
   7   7  -4   10.27    0.91
   7   7  -4   10.67    0.72
  -6  -7   4   12.70    1.18
   6  -7  -4   12.85    0.95
   6   7  -4   12.74    0.71
   6   7  -4   12.37    0.91
  -5  -7   4    0.21    0.63
   5  -7  -4    0.40    0.45
   5   7  -4    0.33    0.28
   5   7  -4    0.41    0.33
   4  -7  -4    0.68    0.41
  -4  -7   4   -0.06    0.58
   4   7  -4    0.52    0.26
   4   7  -4    0.13    0.30
  -3  -7   4   26.19    1.23
   3  -7  -4   25.52    0.94
   3   7  -4   24.88    0.81
   3   7  -4   26.42    0.73
  -2  -7   4   15.49    1.03
   2  -7  -4   14.65    0.74
   2   7  -4   14.88    0.60
   2   7  -4   13.00    0.58
  -2   7   4   14.16    0.52
  -1  -7   4    3.38    0.62
   1  -7  -4    4.32    0.52
   1   7  -4    2.67    0.27
   1   7  -4    2.92    0.37
  -1   7   4    2.71    0.38
   0  -7   4    0.41    0.42
   0  -7  -4    0.09    0.36
   0   7  -4    0.17    0.15
   0   7  -4   -0.15    0.23
   0   7   4    0.45    0.34
   0   7   4   -0.02    0.19
  -1  -7  -4    0.67    0.36
   1  -7   4    0.52    0.47
  -1   7  -4    0.49    0.34
  -1   7  -4    0.51    0.12
   1   7   4    0.54    0.17
   1   7   4    0.17    0.37
  -2  -7  -4  146.22    2.77
   2  -7   4  150.09    3.58
  -2   7  -4  149.05    2.90
   2   7   4  147.27    3.57
   2   7   4  147.84    2.27
   3  -7   4    7.94    0.89
  -3  -7  -4    7.92    0.71
   3   7   4    8.59    0.44
  -3   7  -4    9.12    0.82
   3   7   4    8.57    0.97
  -4  -7  -4    0.13    0.42
   4  -7   4    0.63    0.50
  -4   7  -4    0.72    0.51
   4   7   4    0.02    0.55
   5  -7   4    1.38    0.58
  -5  -7  -4    2.46    0.56
   5   7   4    1.18    0.69
  -5   7  -4    1.93    0.63
  -6  -7  -4    0.47    0.47
   6  -7   4    0.30    0.54
   6   7   4    0.17    0.64
  -6   7  -4    0.54    0.54
   7  -7   4    1.39    0.75
  -7  -7  -4    1.52    0.58
  -7   7  -4    1.20    0.68
   7   7   4    1.59    0.93
   8  -7   4    0.84    0.67
   8   7   4    0.32    0.82
  -8   7  -4    1.27    0.68
  10  -8  -4    0.93    0.65
  10   8  -4    0.73    0.65
   9  -8  -4    1.65    0.69
   9   8  -4    2.21    0.68
   8  -8  -4    0.53    0.57
  -8  -8   4    1.67    0.77
   8   8  -4    0.78    0.54
   7  -8  -4    2.04    0.60
  -7  -8   4    1.38    0.70
   7   8  -4    1.72    0.54
   7   8  -4    1.63    0.40
   6  -8  -4    2.85    0.63
  -6  -8   4    3.06    0.73
   6   8  -4    2.75    0.41
   6   8  -4    2.45    0.54
  -5  -8   4    1.83    0.68
   5  -8  -4    1.85    0.49
   5   8  -4    2.18    0.35
   5   8  -4    2.67    0.48
   4  -8  -4    9.53    0.75
  -4  -8   4    8.20    0.93
   4   8  -4    8.38    0.65
   4   8  -4    8.96    0.46
   3  -8  -4    6.14    0.60
  -3  -8   4    6.02    0.78
   3   8  -4    6.29    0.48
   3   8  -4    6.75    0.45
   2  -8  -4    2.67    0.43
  -2  -8   4    2.43    0.68
   2   8  -4    2.05    0.31
  -2   8   4    2.29    0.30
   2   8  -4    2.19    0.32
  -1  -8   4    7.72    0.86
   1  -8  -4    7.59    0.63
  -1   8   4    6.60    0.52
   1   8  -4    5.42    0.47
   1   8  -4    5.68    0.40
  -1   8   4    6.35    0.47
   0  -8  -4   11.51    0.67
   0  -8   4   12.32    0.87
   0   8  -4   13.31    0.64
   0   8  -4   12.62    0.43
   0   8   4   12.54    0.53
   0   8   4   12.41    0.75
   1  -8   4    1.05    0.46
  -1  -8  -4    1.27    0.42
  -1   8  -4    1.66    0.36
  -1   8  -4    1.55    0.17
   1   8   4    1.33    0.22
   1   8   4    1.39    0.49
  -2  -8  -4    8.69    0.70
   2  -8   4    9.18    0.89
   2   8   4    9.25    0.87
   2   8   4    9.19    0.44
  -2   8  -4    8.71    0.72
  -2   8  -4    8.66    0.27
   3  -8   4    8.98    0.91
  -3  -8  -4    9.43    0.74
   3   8   4    9.73    0.48
  -3   8  -4   10.47    0.81
   3   8   4    8.41    0.99
  -4  -8  -4    1.41    0.49
   4  -8   4    1.27    0.60
   4   8   4    0.97    0.63
   4   8   4    1.17    0.27
  -4   8  -4    1.06    0.55
   5  -8   4   -0.02    0.52
  -5  -8  -4    0.24    0.43
  -5   8  -4    0.47    0.54
   5   8   4    0.26    0.63
  -6  -8  -4    1.28    0.50
   6  -8   4    0.98    0.56
   6   8   4    0.37    0.77
  -6   8  -4    1.01    0.64
   7  -8   4    0.26    0.55
  -7  -8  -4    0.51    0.47
   7   8   4    0.32    0.88
  -7   8  -4    0.70    0.66
   8  -8   4    2.19    0.78
  -8   8  -4    1.41    0.71
   8   8   4    0.96    0.99
  10  -9  -4    6.31    0.97
  10   9  -4    4.11    0.88
   9  -9  -4    0.11    0.58
   9   9  -4    0.65    0.58
   8  -9  -4   -0.38    0.49
  -8  -9   4    0.77    0.73
   8   9  -4   -0.32    0.45
   7  -9  -4   -0.42    0.48
  -7  -9   4   -0.17    0.67
   7   9  -4    0.01    0.42
  -6  -9   4    2.61    0.82
   6  -9  -4    3.70    0.63
   6   9  -4    2.92    0.40
   6   9  -4    2.95    0.56
   5  -9  -4    2.98    0.59
  -5  -9   4    3.25    0.86
   5   9  -4    2.60    0.36
   5   9  -4    3.27    0.47
   4  -9  -4   57.53    1.52
  -4  -9   4   57.52    1.94
   4   9  -4   59.54    1.46
   4   9  -4   56.61    1.15
  -3  -9   4   17.95    1.16
   3  -9  -4   19.53    0.86
   3   9  -4   18.74    0.75
   3   9  -4   18.42    0.60
   2  -9  -4   28.46    0.97
  -2  -9   4   26.42    1.28
   2   9  -4   27.28    0.81
   2   9  -4   26.88    0.74
  -2   9   4   28.65    0.76
  -1  -9   4    6.72    0.93
   1  -9  -4    5.16    0.56
  -1   9   4    5.40    0.47
   1   9  -4    4.64    0.38
  -1   9   4    5.07    0.50
   1   9  -4    4.87    0.43
   0  -9  -4    5.61    0.54
   0  -9   4    6.61    0.77
   0   9  -4    5.60    0.48
   0   9  -4    5.59    0.34
   0   9   4    4.66    0.60
   0   9   4    5.60    0.43
   1  -9   4    0.25    0.43
  -1  -9  -4    0.46    0.37
  -1   9  -4   -0.11    0.27
  -1   9  -4    0.06    0.14
   1   9   4    0.12    0.18
   1   9   4   -0.25    0.37
   2  -9   4   31.21    1.39
  -2  -9  -4   32.94    1.09
  -2   9  -4   32.79    0.63
   2   9   4   33.12    1.48
  -2   9  -4   32.73    1.16
   2   9   4   32.76    0.84
   3  -9   4    0.56    0.47
  -3  -9  -4    0.05    0.38
   3   9   4    0.48    0.22
   3   9   4   -0.43    0.49
  -3   9  -4    0.69    0.48
  -4  -9  -4    2.26    0.49
   4  -9   4    1.97    0.59
   4   9   4    2.13    0.70
  -4   9  -4    1.98    0.55
   4   9   4    2.33    0.32
  -5  -9  -4    1.29    0.50
   5  -9   4    2.63    0.73
  -5   9  -4    2.67    0.68
   5   9   4    2.21    0.78
  -6  -9  -4    5.54    0.76
   6  -9   4    5.46    0.95
  -6   9  -4    5.88    0.91
   6   9   4    4.30    1.00
  -7  -9  -4    0.61    0.47
   7  -9   4    0.30    0.63
   7   9   4   -0.72    0.82
  -7   9  -4    0.95    0.67
   8  -9   4    4.03    0.94
  -8   9  -4    3.92    0.89
   8   9   4    3.14    1.16
  10 -10  -4    2.02    0.75
  10  10  -4    1.79    0.72
  -9 -10   4    1.70    0.85
   9 -10  -4    1.22    0.63
   9  10  -4    1.59    0.61
  -8 -10   4    8.70    1.20
   8 -10  -4    6.02    0.82
   8  10  -4    8.82    0.94
   7 -10  -4    2.10    0.64
  -7 -10   4    2.42    0.83
   7  10  -4    3.05    0.57
  -6 -10   4    0.27    0.74
   6 -10  -4    0.93    0.47
   6  10  -4    0.39    0.44
   6  10  -4    1.41    0.32
   5 -10  -4   28.10    1.19
  -5 -10   4   25.66    1.48
   5  10  -4   27.76    1.10
   5  10  -4   26.43    0.78
  -4 -10   4    2.66    0.72
   4 -10  -4    2.58    0.48
   4  10  -4    2.79    0.40
   4  10  -4    3.28    0.36
   3 -10  -4    6.31    0.64
  -3 -10   4    6.86    0.92
   3  10  -4    6.15    0.54
   3  10  -4    6.70    0.42
   2 -10  -4   10.32    0.68
  -2 -10   4   10.96    1.00
   2  10  -4   10.26    0.49
   2  10  -4   10.47    0.56
  -2  10   4   10.40    0.48
   1 -10  -4    1.58    0.40
  -1 -10   4    0.85    0.55
   1  10  -4    1.09    0.25
  -1  10   4    1.46    0.32
   1  10  -4    1.77    0.30
  -1  10   4    0.99    0.29
   0 -10   4    0.26    0.47
   0 -10  -4    0.56    0.39
   0  10  -4    0.05    0.25
   0  10  -4    0.09    0.18
   0  10   4    0.14    0.36
   0  10   4    0.01    0.21
  -1 -10  -4   39.81    1.18
   1 -10   4   42.24    1.58
  -1  10  -4   41.70    0.83
  -1  10  -4   42.66    1.23
   1  10   4   40.40    0.97
   1  10   4   42.63    1.55
   2 -10   4    2.46    0.58
  -2 -10  -4    2.34    0.46
  -2  10  -4    2.32    0.22
   2  10   4    2.14    0.60
  -2  10  -4    2.36    0.50
   2  10   4    2.79    0.31
  -3 -10  -4    0.20    0.41
   3 -10   4    0.57    0.48
   3  10   4    0.13    0.54
   3  10   4    0.59    0.24
  -3  10  -4    0.51    0.49
  -4 -10  -4    0.89    0.45
   4 -10   4    1.30    0.59
  -4  10  -4    1.29    0.51
   4  10   4    0.51    0.25
   4  10   4    0.92    0.62
  -5 -10  -4    1.84    0.51
   5 -10   4    1.53    0.66
  -5  10  -4    1.79    0.64
   5  10   4    2.00    0.83
  -6 -10  -4    4.33    0.66
   6 -10   4    4.55    0.90
  -6  10  -4    3.72    0.80
   6  10   4    4.72    1.10
   7 -10   4    0.35    0.61
   7  10   4    0.74    0.95
  -7  10  -4    1.29    0.73
   8  10   4    0.69    1.05
  -8  10  -4    2.13    0.78
  10 -11  -4    0.15    0.59
  10  11  -4    0.39    0.62
  -9 -11   4    2.85    0.91
   9 -11  -4    1.60    0.72
   9  11  -4    2.92    0.71
   8 -11  -4    4.63    0.78
  -8 -11   4    5.02    0.97
   8  11  -4    6.65    0.80
   7 -11  -4    5.34    0.80
  -7 -11   4    4.61    0.98
   7  11  -4    4.52    0.69
   6 -11  -4   -0.17    0.49
  -6 -11   4   -0.18    0.74
   6  11  -4   -0.14    0.41
  -5 -11   4    5.06    1.00
   5 -11  -4    4.44    0.62
   5  11  -4    4.64    0.58
   5  11  -4    4.22    0.41
   4 -11  -4    0.65    0.41
  -4 -11   4    0.72    0.74
   4  11  -4    0.20    0.21
   4  11  -4   -0.05    0.33
   3 -11  -4    0.43    0.37
  -3 -11   4    0.12    0.63
   3  11  -4    0.06    0.28
   3  11  -4    0.14    0.22
  -2 -11   4   47.98    1.74
   2 -11  -4   44.38    1.25
  -2  11   4   48.59    1.13
   2  11  -4   47.15    1.14
   2  11  -4   48.25    1.01
  -1 -11   4   10.10    0.96
   1 -11  -4    9.14    0.63
  -1  11   4   10.00    0.59
   1  11  -4    8.36    0.48
  -1  11   4    9.77    0.59
   1  11  -4    8.94    0.50
   0 -11   4   12.61    0.94
   0 -11  -4   11.61    0.67
   0  11   4   13.28    0.61
   0  11  -4   13.33    0.64
   0  11  -4   13.19    0.51
   0  11   4   13.21    0.80
   1 -11   4    0.28    0.45
  -1 -11  -4    0.29    0.32
   1  11   4   -0.05    0.40
  -1  11  -4    0.28    0.17
  -1  11  -4    0.08    0.31
   1  11   4    0.25    0.21
   2 -11   4   91.35    2.66
  -2 -11  -4   97.43    2.07
   2  11   4   98.18    1.78
   2  11   4  100.52    2.78
  -2  11  -4   97.13    1.55
  -2  11  -4   93.55    2.17
  -3 -11  -4    2.70    0.49
   3 -11   4    2.39    0.67
  -3  11  -4    2.85    0.61
   3  11   4    1.63    0.72
   3  11   4    2.54    0.34
   4 -11   4    0.26    0.47
  -4 -11  -4    0.64    0.41
   4  11   4    0.33    0.26
   4  11   4    0.19    0.66
  -4  11  -4    0.22    0.45
  -5 -11  -4    6.23    0.71
   5 -11   4    5.77    0.91
  -5  11  -4    5.70    0.87
   5  11   4    5.60    1.09
  -6 -11  -4    0.54    0.45
   6 -11   4    0.91    0.63
   6  11   4   -0.01    0.76
  -6  11  -4    0.72    0.59
   7 -11   4    1.63    0.71
  -7  11  -4    0.85    0.70
   7  11   4   -0.17    0.84
   8  11   4    0.79    1.16
  -8  11  -4    4.37    0.86
  10 -12  -4    1.58    0.73
  10  12  -4    0.20    0.58
   9 -12  -4   -0.02    0.63
  -9 -12   4    2.14    0.95
   9  12  -4    1.18    0.62
  -8 -12   4    2.24    0.87
   8 -12  -4    1.76    0.62
   8  12  -4    1.49    0.56
  -7 -12   4    6.90    1.09
   7 -12  -4    5.86    0.79
   7  12  -4    8.78    0.83
   6 -12  -4    0.79    0.49
  -6 -12   4    0.06    0.70
   6  12  -4    0.41    0.37
   5 -12  -4   14.78    0.92
  -5 -12   4   13.99    1.41
   5  12  -4   13.33    0.80
   5  12  -4   14.82    0.57
  -4 -12   4    1.19    0.72
   4 -12  -4    1.86    0.54
   4  12  -4    1.42    0.40
   4  12  -4    1.66    0.24
  -3 -12   4   31.64    1.54
   3 -12  -4   30.30    1.08
   3  12  -4   29.97    1.01
   3  12  -4   31.04    0.73
   2 -12  -4    0.15    0.34
   2 -12  -4    0.12    0.20
  -2 -12   4    1.22    0.66
   2  12  -4   -0.05    0.26
  -2  12   4    0.51    0.29
   2  12  -4    0.05    0.21
   1 -12  -4   16.34    0.80
  -1 -12   4   14.97    1.08
   1  12  -4   14.59    0.58
  -1  12   4   14.73    0.74
   1  12  -4   15.54    0.61
  -1  12   4   16.50    0.72
   0 -12  -4    6.89    0.65
   0 -12   4    7.06    0.85
   0  12   4    6.13    0.48
   0  12  -4    6.28    0.51
   0  12   4    6.24    0.67
   0  12  -4    6.18    0.43
  -1 -12  -4    0.66    0.36
   1 -12   4   -0.05    0.44
  -1  12  -4    0.05    0.18
   1  12   4    0.05    0.40
  -1  12  -4    0.04    0.31
   1  12   4    0.28    0.23
  -2 -12  -4    2.82    0.49
   2 -12   4    2.83    0.60
   2  12   4    3.20    0.37
  -2  12  -4    2.60    0.26
   2  12   4    2.61    0.63
  -2  12  -4    2.36    0.47
  -3 -12  -4    5.96    0.66
   3 -12   4    6.89    0.86
  -3  12  -4    5.61    0.73
   3  12   4    5.14    0.45
   3  12   4    6.01    0.89
  -4 -12  -4    2.36    0.54
   4 -12   4    2.89    0.67
  -4  12  -4    3.29    0.64
   4  12   4    2.94    0.79
   4  12   4    3.22    0.39
   5 -12   4    0.98    0.58
  -5 -12  -4    1.97    0.50
   5  12   4    0.22    0.70
  -5  12  -4    1.35    0.64
  -6 -12  -4    1.57    0.50
   6 -12   4    0.06    0.49
  -6  12  -4    0.53    0.62
   6  12   4    1.19    0.91
   7 -12   4    0.30    0.58
   7  12   4   -0.23    0.83
  -7  12  -4   -0.15    0.60
   8  12   4   -0.95    1.03
  -8  12  -4    3.06    0.84
  10 -13  -4    1.85    0.78
  10  13  -4    1.73    0.72
   9 -13  -4    0.32    0.64
  -9 -13   4    1.46    0.92
   9  13  -4    1.32    0.63
  -8 -13   4    0.59    0.81
   8 -13  -4    0.16    0.53
   8  13  -4    0.28    0.50
   7 -13  -4    3.40    0.69
  -7 -13   4    4.22    0.98
   7  13  -4    3.23    0.62
  -6 -13   4    4.86    0.96
   6 -13  -4    6.54    0.81
   6  13  -4    4.91    0.65
   5 -13  -4    0.75    0.49
  -5 -13   4    0.80    0.78
   5  13  -4    0.45    0.40
  -4 -13   4    3.02    0.84
   4 -13  -4    3.66    0.57
   4  13  -4    3.61    0.29
   4  13  -4    3.46    0.50
   3 -13  -4   17.73    0.87
  -3 -13   4   18.12    1.31
   3  13  -4   18.60    0.83
   3  13  -4   18.35    0.53
  -2 -13   4   76.35    2.38
   2 -13  -4   79.59    1.80
   2 -13  -4   78.79    1.71
   2  13  -4   78.12    1.62
  -2  13   4   78.69    1.71
   2  13  -4   77.90    1.41
  -1 -13   4    0.70    0.62
   1 -13  -4    0.31    0.38
   1  13  -4    0.38    0.24
  -1  13   4    0.06    0.25
   1  13  -4    0.02    0.21
  -1  13   4    0.26    0.30
   0 -13   4   23.56    1.32
   0 -13  -4   23.17    0.88
   0  13   4   23.12    0.81
   0  13  -4   23.25    0.72
   0  13  -4   23.72    0.84
   0  13   4   23.16    1.02
  -1 -13  -4    4.46    0.52
   1 -13   4    4.39    0.70
   1  13   4    4.89    0.44
  -1  13  -4    5.31    0.53
  -1  13  -4    5.19    0.40
   1  13   4    4.30    0.63
   2 -13   4    7.20    0.94
  -2 -13  -4    6.97    0.68
  -2  13  -4    6.27    0.41
   2  13   4    6.32    0.49
  -2  13  -4    7.39    0.68
   2  13   4    6.76    0.91
   3 -13   4    0.97    0.53
  -3 -13  -4    0.72    0.45
   3  13   4    1.05    0.29
  -3  13  -4    1.85    0.56
   3  13   4    0.96    0.64
  -4 -13  -4    1.11    0.46
   4 -13   4    0.93    0.54
   4  13   4    1.55    0.34
  -4  13  -4    1.67    0.61
   4  13   4    1.51    0.72
  -5 -13  -4    4.85    0.65
   5 -13   4    4.06    0.84
   5  13   4    3.67    0.96
  -5  13  -4    3.20    0.70
   6 -13   4    5.37    0.96
   6  13   4    3.51    1.01
  -6  13  -4    5.28    0.93
   7 -13   4    0.19    0.57
   7  13   4   -0.63    0.84
  -7  13  -4    1.52    0.73
  -8  13  -4    2.26    0.79
   8  13   4   -1.56    1.04
  10 -14  -4   -0.20    0.64
  10  14  -4    0.35    0.60
  -9 -14   4    1.30    0.95
   9 -14  -4    0.41    0.65
   9  14  -4    0.05    0.56
   8 -14  -4    3.08    0.74
  -8 -14   4    3.65    1.04
   8  14  -4    3.84    0.77
  -7 -14   4   10.61    1.43
   7 -14  -4   10.92    1.11
   7  14  -4   10.41    0.95
   6 -14  -4    1.29    0.53
  -6 -14   4    1.65    0.81
   6  14  -4    1.41    0.50
   5 -14  -4    7.41    0.78
  -5 -14   4    7.14    1.09
   5  14  -4    7.00    0.69
   4 -14  -4    1.23    0.52
  -4 -14   4    1.34    0.81
   4  14  -4    0.83    0.35
  -3 -14   4    1.44    0.78
   3 -14  -4    1.86    0.49
   3  14  -4    1.70    0.39
   3  14  -4    1.63    0.22
  -2 -14   4    3.23    0.78
   2 -14  -4    2.48    0.49
   2 -14  -4    2.06    0.32
   2  14  -4    2.12    0.28
  -2  14   4    1.97    0.43
   2  14  -4    1.63    0.35
  -1 -14   4    2.30    0.69
   1 -14  -4    2.31    0.45
   1  14  -4    1.72    0.31
  -1  14   4    1.95    0.41
  -1  14   4    2.37    0.41
   1  14  -4    2.03    0.31
   0 -14  -4    4.31    0.53
   0 -14   4    3.49    0.72
   0  14   4    2.96    0.52
   0  14   4    2.63    0.39
   0  14  -4    3.15    0.34
   0  14  -4    3.36    0.41
   1 -14   4   11.71    0.99
  -1 -14  -4   10.90    0.75
   1  14   4   11.84    0.93
  -1  14  -4   12.86    0.71
   1  14   4   11.68    0.62
  -1  14  -4   12.16    0.54
   2 -14   4    8.56    0.97
  -2 -14  -4    7.33    0.74
  -2  14  -4    7.75    0.70
  -2  14  -4    7.29    0.45
   2  14   4    7.85    0.54
   2  14   4    7.41    0.95
   3 -14   4    1.55    0.63
  -3 -14  -4    1.67    0.47
  -3  14  -4    1.83    0.51
   3  14   4    1.52    0.68
   3  14   4    1.30    0.33
  -4 -14  -4   10.71    0.79
   4 -14   4    8.64    0.97
   4  14   4    9.73    1.23
   4  14   4   10.26    0.63
  -4  14  -4   11.33    1.00
   5 -14   4    0.10    0.54
  -5 -14  -4    0.80    0.45
   5  14   4   -0.12    0.70
  -5  14  -4    0.29    0.58
   6 -14   4    6.72    0.92
  -6  14  -4    6.34    0.93
   6  14   4    6.62    1.23
   7 -14   4    2.58    0.78
  -7  14  -4    0.75    0.72
   7  14   4    1.23    1.17
  -8  14  -4    1.26    0.74
   8  14   4   -2.68    1.08
  10 -15  -4    3.63    0.93
  10  15  -4    2.63    0.80
   9 -15  -4   -0.16    0.62
  -9 -15   4    0.72    0.95
   9  15  -4   -0.35    0.55
   8 -15  -4    2.62    0.78
  -8 -15   4    3.65    1.08
   8  15  -4    3.75    0.72
   7 -15  -4    0.38    0.52
  -7 -15   4    1.26    0.93
   7  15  -4    0.88    0.52
  -6 -15   4    3.68    0.95
   6 -15  -4    2.05    0.57
   6  15  -4    2.03    0.48
  -5 -15   4    1.76    0.88
   5 -15  -4    1.48    0.52
   5  15  -4    2.22    0.50
   4 -15  -4   12.20    0.85
  -4 -15   4   11.34    1.46
   4  15  -4   11.89    0.79
   3 -15  -4   78.35    1.90
  -3 -15   4   77.00    2.54
  -3  15   4   76.49    1.79
   3  15  -4   78.48    1.76
   3  15  -4   76.41    1.24
  -2 -15   4   11.26    1.20
   2 -15  -4   11.19    0.59
   2 -15  -4   11.66    0.80
   2  15  -4   10.72    0.63
  -2  15   4   10.59    0.74
   2  15  -4   10.75    0.48
   1 -15  -4   15.45    0.77
  -1 -15   4   17.99    1.23
   1  15  -4   16.59    0.62
  -1  15   4   16.88    0.82
   1  15  -4   16.12    0.69
  -1  15   4   16.09    0.78
   0 -15   4    0.79    0.61
   0 -15  -4    0.33    0.36
   0  15   4    0.14    0.43
   0  15  -4   -0.20    0.23
   0  15  -4    0.01    0.23
   0  15   4    0.17    0.28
   1 -15   4    0.37    0.54
  -1 -15  -4   -0.08    0.37
   1  15   4    0.34    0.27
  -1  15  -4    0.06    0.31
   1  15   4    0.29    0.48
  -1  15  -4    0.03    0.22
   2 -15   4    3.62    0.72
  -2 -15  -4    3.32    0.53
  -2  15  -4    3.64    0.59
   2  15   4    2.91    0.72
   2  15   4    3.17    0.41
  -2  15  -4    3.40    0.35
   3 -15   4    6.03    0.88
  -3 -15  -4    6.59    0.65
   3  15   4    4.43    0.89
  -3  15  -4    5.51    0.72
   3  15   4    5.70    0.51
   4 -15   4    1.71    0.61
  -4 -15  -4    1.67    0.49
   4  15   4    2.02    0.78
   4  15   4    1.96    0.37
  -4  15  -4    1.74    0.60
   5 -15   4    0.75    0.58
  -5 -15  -4    0.16    0.43
   5  15   4   -0.33    0.84
  -5  15  -4    0.31    0.52
   6 -15   4    1.45    0.69
  -6  15  -4    1.31    0.73
   6  15   4   -0.39    0.93
   7 -15   4    3.02    0.91
  -7  15  -4    2.54    0.83
   7  15   4    0.70    1.14
  -8  15  -4    1.93    1.29
  10 -16  -4    1.97    0.81
  10  16  -4    0.90    0.64
  -9 -16   4    1.31    1.02
   9 -16  -4    0.38    0.68
   9  16  -4    0.08    0.55
   8 -16  -4    0.08    0.65
  -8 -16   4    1.17    1.01
   8  16  -4    0.59    0.55
   7 -16  -4    1.15    0.66
  -7 -16   4    1.28    0.97
   7  16  -4    1.03    0.53
  -6 -16   4   -0.07    0.80
   6 -16  -4    0.43    0.54
   6  16  -4    0.06    0.37
   5 -16  -4    1.03    0.49
  -5 -16   4    0.76    0.85
   5  16  -4    0.39    0.41
   4 -16  -4    1.56    0.55
  -4 -16   4    0.84    0.84
   4  16  -4    0.57    0.40
   3 -16  -4    8.03    0.79
  -3 -16   4    8.39    1.21
  -3  16   4    7.06    0.68
   3  16  -4    8.32    0.67
   2 -16  -4    8.43    0.74
   2 -16  -4    6.35    0.57
  -2 -16   4    7.15    1.02
  -2  16   4    8.39    0.74
   2  16  -4    6.88    0.41
   2  16  -4    6.96    0.58
   1 -16  -4   -0.38    0.39
  -1 -16   4    0.56    0.74
   1 -16  -4    0.21    0.35
  -1  16   4    0.01    0.33
   1  16  -4    0.07    0.22
   1  16  -4   -0.12    0.25
   0 -16   4    3.79    0.77
   0 -16  -4    5.02    0.57
   0  16   4    3.04    0.59
   0  16  -4    2.65    0.36
   0  16  -4    3.24    0.41
   0  16   4    3.25    0.46
  -1 -16  -4    1.93    0.45
   1 -16   4    2.61    0.73
   1  16   4    0.88    0.58
   1  16   4    1.63    0.36
  -1  16  -4    1.30    0.39
  -1  16  -4    1.73    0.31
  -2 -16  -4    4.21    0.57
   2 -16   4    4.92    0.83
  -2  16  -4    3.46    0.54
   2  16   4    4.28    0.78
  -2  16  -4    4.76    0.44
   2  16   4    4.44    0.47
  -3 -16  -4    0.60    0.41
   3 -16   4    0.07    0.46
   3  16   4    0.45    0.29
   3  16   4    0.89    0.75
  -3  16  -4    0.25    0.47
  -4 -16  -4    0.25    0.41
   4 -16   4    0.47    0.56
   4  16   4    0.42    0.72
   4  16   4    0.46    0.30
  -4  16  -4    0.69    0.51
   5 -16   4    0.86    0.61
  -5  16  -4    0.78    0.62
   5  16   4    0.56    0.81
   6 -16   4    0.53    0.58
  -6  16  -4    0.32    0.63
   6  16   4   -0.03    0.90
   7  16   4   -1.26    0.91
  -7  16  -4    1.26    0.67
  10 -17  -4    0.31    0.74
  10  17  -4    0.66    0.65
  -9 -17   4    1.07    1.05
   9 -17  -4   -0.40    0.65
   9  17  -4    1.07    0.60
   8 -17  -4    1.68    0.67
  -8 -17   4    3.16    1.13
   8  17  -4    1.89    0.62
   7 -17  -4    1.85    0.65
  -7 -17   4    2.44    1.08
   7  17  -4    2.18    0.60
   6 -17  -4    5.82    0.80
  -6 -17   4    4.99    1.07
   6  17  -4    4.99    0.66
  -5 -17   4    1.49    0.91
   5 -17  -4    2.64    0.59
   5  17  -4    2.28    0.51
   4 -17  -4    2.02    0.53
  -4 -17   4    2.27    0.96
   4  17  -4    2.52    0.49
  -3 -17   4   22.41    1.58
   3 -17  -4   18.84    1.02
  -3  17   4   20.03    1.02
   3  17  -4   20.26    0.88
   2 -17  -4    1.30    0.45
   2 -17  -4    1.11    0.37
  -2 -17   4    1.47    0.81
   2  17  -4    1.21    0.24
  -2  17   4    1.19    0.43
   2  17  -4    0.85    0.33
   1 -17  -4    0.39    0.40
  -1 -17   4    0.49    0.71
   1 -17  -4    0.27    0.34
   1  17  -4    0.01    0.22
   1  17  -4    0.23    0.28
  -1  17   4    0.17    0.34
   0 -17  -4    0.01    0.36
   0 -17   4    1.00    0.66
   0  17   4    0.17    0.33
   0  17  -4   -0.06    0.25
   0  17  -4   -0.02    0.25
   0  17   4    0.14    0.46
   1 -17   4    4.44    0.78
  -1 -17  -4    3.64    0.53
  -1  17  -4    4.04    0.41
   1  17   4    2.98    0.43
   1  17   4    2.86    0.64
  -1  17  -4    3.03    0.48
  -2 -17  -4    0.23    0.41
   2 -17   4    0.61    0.55
   2  17   4    0.17    0.60
  -2  17  -4    0.50    0.43
  -2  17  -4    0.71    0.27
   2  17   4    0.75    0.31
   3 -17   4   10.59    1.02
  -3 -17  -4    9.51    0.79
   3  17   4    9.39    0.62
   3  17   4    9.64    1.20
  -3  17  -4    9.28    0.89
  -4 -17  -4   15.78    0.91
   4 -17   4   14.71    1.24
   4  17   4   14.81    0.77
  -4  17  -4   15.99    1.15
   4  17   4   14.69    1.44
   5 -17   4    0.96    0.58
  -5  17  -4    0.36    0.54
   5  17   4    2.11    0.98
   6 -17   4    0.01    0.57
  -6  17  -4    0.58    0.61
   6  17   4   -0.04    1.00
   7  17   4   -2.18    0.90
  -7  17  -4    0.32    0.66
 -10 -18   4   -0.48    1.20
  10  18  -4    2.45    0.78
   9 -18  -4    1.32    0.70
  -9 -18   4    2.00    1.12
   9  18  -4    1.62    0.66
   8 -18  -4    0.48    0.70
  -8 -18   4    2.09    1.08
   8  18  -4    1.76    0.62
   7 -18  -4   11.30    1.17
  -7 -18   4   14.39    1.74
   7  18  -4   12.13    0.95
   6 -18  -4    0.44    0.55
  -6 -18   4    0.73    0.84
   6  18  -4   -0.31    0.40
   5 -18  -4   23.54    1.23
  -5 -18   4   23.62    1.72
   5  18  -4   26.21    1.17
   4 -18  -4    0.76    0.50
  -4 -18   4   -0.18    0.86
  -4  18   4   -0.21    0.46
   4  18  -4    0.43    0.40
   3 -18  -4   27.19    1.09
  -3 -18   4   28.26    1.88
   3  18  -4   27.05    1.06
  -3  18   4   26.65    1.12
   2 -18  -4   12.44    0.78
   2 -18  -4   14.22    0.75
  -2 -18   4   14.94    1.40
   2  18  -4   14.14    0.50
   2  18  -4   14.49    0.78
  -2  18   4   12.83    0.88
   1 -18  -4    0.31    0.38
  -1 -18   4    0.50    0.81
   1 -18  -4    0.15    0.38
   1  18  -4    0.34    0.23
  -1  18   4    0.06    0.31
   1  18  -4   -0.05    0.28
   0 -18  -4    0.58    0.41
   0 -18   4    0.99    0.68
   0 -18  -4   -0.28    0.41
   0  18   4    0.67    0.36
   0  18  -4    0.07    0.27
   0  18  -4    0.87    0.31
  -1 -18  -4    9.88    0.77
   1 -18   4   11.44    1.19
  -1  18  -4   10.31    0.72
   1  18   4   11.58    0.74
   1  18   4   12.65    1.12
  -1  18  -4   10.81    0.62
   2 -18   4    0.58    0.61
  -2 -18  -4    0.87    0.44
   2  18   4    1.00    0.66
  -2  18  -4    0.30    0.27
   2  18   4    0.34    0.31
  -2  18  -4    0.75    0.44
  -3 -18  -4    5.30    0.61
   3 -18   4    6.47    0.93
   3  18   4    4.39    0.91
  -3  18  -4    4.21    0.66
   3  18   4    5.82    0.56
   4 -18   4    4.70    0.82
   4  18   4    5.86    0.58
   4  18   4    6.53    1.14
  -4  18  -4    5.66    0.82
   5 -18   4   -0.17    0.52
   5  18   4   -0.53    0.88
  -5  18  -4   -0.18    0.48
   6 -18   4    3.36    0.83
  -6  18  -4    2.75    0.83
   6  18   4    2.69    1.14
  -7  18  -4    1.44    0.77
   7  18   4   -1.48    1.01
   9 -19  -4   -0.48    0.64
  -9 -19   4    0.81    1.08
   9  19  -4    0.06    0.57
   8 -19  -4    2.09    0.75
  -8 -19   4    4.29    1.18
   8  19  -4    3.72    0.70
  -7 -19   4    0.73    0.91
   7 -19  -4   -0.22    0.59
   7  19  -4   -0.14    0.49
  -6 -19   4    1.66    1.07
   6 -19  -4    1.78    0.63
   6  19  -4    2.07    0.54
  -5 -19   4   -0.59    0.82
   5 -19  -4   -0.22    0.47
   5  19  -4    0.36    0.36
  -5  19   4    0.59    0.50
  -4 -19   4    3.58    1.04
   4 -19  -4    4.94    0.71
   4  19  -4    3.23    0.51
  -4  19   4    4.17    0.65
   3 -19  -4    5.24    0.62
  -3 -19   4    5.30    1.11
  -3  19   4    6.07    0.70
   3  19  -4    4.74    0.56
   2 -19  -4   40.07    1.25
   2 -19  -4   40.60    1.32
  -2 -19   4   37.50    1.93
   2  19  -4   40.43    0.86
  -2  19   4   40.76    1.39
   2  19  -4   40.55    1.24
   1 -19  -4   12.28    0.87
  -1 -19   4   10.80    1.26
   1 -19  -4   10.89    0.76
   1  19  -4   10.95    0.68
   1  19  -4   11.96    0.56
  -1  19   4   11.02    0.79
   0 -19  -4    9.47    0.74
   0 -19   4   11.17    1.28
   0 -19  -4    8.63    0.92
   0  19  -4   10.39    0.63
   0  19   4   10.77    0.74
   0  19  -4   10.35    0.63
   1 -19   4    7.73    1.02
  -1 -19  -4    6.66    0.63
  -1  19  -4    6.84    0.57
  -1  19  -4    6.04    0.63
   1  19   4    6.35    0.61
   1  19   4    5.90    0.88
  -2 -19  -4    0.57    0.41
   2 -19   4    0.52    0.54
   2  19   4    0.26    0.30
   2  19   4    0.72    0.63
  -2  19  -4    0.23    0.29
  -2  19  -4    0.28    0.36
  -3 -19  -4    1.64    0.47
   3 -19   4    2.05    0.66
   3  19   4    2.07    0.85
   3  19   4    1.40    0.37
  -3  19  -4    1.46    0.49
   4 -19   4    7.69    1.04
  -4  19  -4    6.41    0.84
   4  19   4    7.22    1.13
   4  19   4    7.96    0.67
   5 -19   4    1.30    0.68
  -5  19  -4    0.73    0.62
   5  19   4   -0.29    0.83
   6 -19   4    0.50    0.61
  -6  19  -4    1.11    0.73
   6  19   4   -0.58    1.09
  -9 -20   4    0.80    1.00
   9 -20  -4   -0.10    0.63
   9  20  -4    0.50    0.57
  -8 -20   4    0.60    1.10
   8 -20  -4    1.67    0.77
   8  20  -4    1.98    0.65
  -7 -20   4    5.16    1.20
   7 -20  -4    3.09    0.75
   7  20  -4    3.23    0.63
  -6 -20   4    5.60    1.30
   6 -20  -4    5.18    0.85
  -6  20   4    4.20    0.74
   6  20  -4    4.75    0.71
   5 -20  -4    6.36    0.76
  -5 -20   4    6.87    1.22
  -5  20   4    6.32    0.73
   5  20  -4    6.39    0.73
   4 -20  -4    1.24    0.50
  -4 -20   4    1.62    0.96
   4  20  -4    1.01    0.44
  -4  20   4    1.37    0.54
  -3 -20   4   29.49    1.88
   3 -20  -4   32.56    1.27
  -3  20   4   31.89    1.29
   3  20  -4   31.81    1.19
   2 -20  -4   10.51    0.82
   2 -20  -4   11.04    0.77
  -2 -20   4   12.48    1.43
  -2  20   4   12.82    0.89
   2  20  -4   11.06    0.70
   1 -20  -4   18.96    1.01
   1 -20  -4   17.83    0.90
  -1 -20   4   20.27    1.50
   1  20  -4   19.56    0.69
   1  20  -4   19.05    0.85
  -1  20   4   19.54    0.98
   0 -20   4    0.82    0.73
   0 -20  -4    0.59    0.50
   0 -20  -4    1.22    0.46
   0  20  -4    1.18    0.34
   0  20  -4    1.12    0.32
   0  20   4    0.81    0.35
  -1 -20  -4    4.68    0.55
  -1 -20  -4    3.77    0.72
   1 -20   4    4.46    0.90
   1  20   4    3.93    0.51
  -1  20  -4    3.94    0.46
  -1  20  -4    3.56    0.51
   2 -20   4   -0.17    0.49
  -2 -20  -4   -0.59    0.35
  -2  20  -4    0.11    0.29
  -2  20  -4    0.40    0.39
   2  20   4   -0.08    0.30
   2  20   4   -0.22    0.70
   3 -20   4    1.61    0.60
  -3 -20  -4    2.13    0.49
   3  20   4    1.43    0.38
  -3  20  -4    1.90    0.52
   3  20   4    1.16    0.76
   4 -20   4   -0.42    0.54
   4  20   4   -0.55    0.76
  -4  20  -4    0.53    0.53
   4  20   4    0.01    0.30
   5 -20   4   -0.20    0.55
  -5  20  -4    0.10    0.59
   5  20   4   -0.59    0.90
  -6 -20  -4    3.03    0.88
   6 -20   4    0.86    0.65
  -6  20  -4    2.02    0.80
  -7 -20  -4    4.72    1.09
  -7  20  -4    2.51    0.81
  -9 -21   4    0.92    1.03
   9  21  -4    0.81    0.59
  -9  21   4   -0.40    0.64
   8 -21  -4   10.00    1.17
  -8 -21   4    9.61    1.58
  -8  21   4    7.80    0.95
   8  21  -4    9.82    1.04
  -7 -21   4    5.91    1.30
   7 -21  -4    6.33    0.91
  -7  21   4    3.59    0.73
   7  21  -4    5.54    0.79
  -6 -21   4    2.52    1.07
   6 -21  -4    1.54    0.66
  -6  21   4    1.94    0.65
   6  21  -4    1.93    0.50
  -5 -21   4    3.70    1.10
   5 -21  -4    3.86    0.72
   5  21  -4    3.54    0.60
  -5  21   4    4.11    0.70
  -4 -21   4    1.88    0.99
   4 -21  -4    2.09    0.59
  -4  21   4    1.10    0.49
   4  21  -4    1.68    0.47
  -3 -21   4    3.23    1.17
   3 -21  -4    3.51    0.62
  -3  21   4    2.70    0.53
   3  21  -4    3.06    0.51
  -2 -21   4    2.54    0.99
   2 -21  -4    2.17    0.50
   2 -21  -4    2.75    0.56
  -2  21   4    1.43    0.50
   2  21  -4    1.63    0.40
   1 -21  -4    4.44    0.60
   1 -21  -4    4.30    0.67
  -1 -21   4    4.26    0.98
   1  21  -4    2.99    0.45
  -1  21   4    3.93    0.59
   1  21  -4    4.33    0.41
   0 -21   4   12.43    1.39
   0 -21  -4   12.56    1.04
   0 -21  -4   12.05    0.77
   0  21  -4   11.86    0.66
   0  21  -4   12.82    0.75
   0  21   4   12.97    0.83
   1 -21   4    2.25    0.78
  -1 -21  -4    2.19    0.49
  -1 -21  -4    2.45    0.71
  -1  21  -4    3.27    0.50
  -1  21  -4    3.03    0.44
   1  21   4    2.30    0.47
  -2 -21  -4   11.44    1.12
  -2 -21  -4    9.06    0.72
   2 -21   4   10.05    1.04
  -2  21  -4   11.23    0.66
   2  21   4   11.47    0.75
  -2  21  -4   11.27    0.84
   3 -21   4    0.67    0.61
  -3  21  -4    1.39    0.49
   3  21   4    0.64    0.77
   3  21   4    1.08    0.39
   4 -21   4   -0.21    0.53
  -4  21  -4    0.20    0.54
   4  21   4    0.12    0.83
   4  21   4    0.27    0.34
  -5 -21  -4    2.80    0.88
   5 -21   4    2.21    0.77
  -5  21  -4    2.57    0.73
  -6 -21  -4    2.37    0.91
  -6  21  -4    1.40    0.77
  -7 -21  -4    3.42    0.95
  -7  21  -4    1.74    0.78
   9 -22  -4   -0.27    0.61
  -9 -22   4   -0.34    1.10
   9  22  -4    1.14    0.61
  -9  22   4   -0.46    0.63
  -8 -22   4    2.52    1.26
   8 -22  -4    1.51    0.69
   8  22  -4    2.06    0.63
  -8  22   4    1.37    0.67
   7 -22  -4   -0.90    0.48
  -7 -22   4    1.01    1.18
   7  22  -4   -0.30    0.48
  -7  22   4   -0.42    0.54
  -6 -22   4    5.22    1.27
   6 -22  -4    5.90    0.93
  -6  22   4    4.93    0.77
   6  22  -4    6.40    0.78
  -5 -22   4   18.88    1.89
   5 -22  -4   17.19    1.16
  -5  22   4   17.60    1.21
   5  22  -4   18.61    1.05
  -4 -22   4    2.12    1.05
   4 -22  -4    4.22    0.72
   4  22  -4    2.90    0.54
  -4  22   4    2.97    0.61
   3 -22  -4    0.49    0.47
  -3 -22   4   -0.06    0.90
   3  22  -4    0.03    0.37
  -3  22   4    0.39    0.42
  -2 -22   4    2.48    1.02
   2 -22  -4    1.03    0.50
   2 -22  -4    2.13    0.51
  -2  22   4    0.89    0.47
   2  22  -4    1.32    0.42
  -1 -22   4    2.79    0.93
   1 -22  -4    2.19    0.48
   1 -22  -4    3.05    0.66
   1  22  -4    2.34    0.45
   1  22  -4    3.09    0.35
  -1  22   4    1.97    0.50
   0 -22  -4    2.31    0.64
   0 -22  -4    1.27    0.43
   0 -22   4    1.78    0.80
   0  22  -4    1.78    0.36
   0  22   4    1.88    0.47
   0  22  -4    1.49    0.39
  -1 -22  -4    1.13    0.43
  -1 -22  -4    1.81    0.63
   1 -22   4    0.59    0.68
  -1  22  -4    0.70    0.37
  -1  22  -4    0.82    0.35
   1  22   4    0.94    0.41
  -2 -22  -4    3.13    0.79
  -2 -22  -4    1.87    0.46
   2 -22   4    2.09    0.67
  -2  22  -4    1.64    0.38
  -2  22  -4    1.37    0.46
   2  22   4    1.23    0.39
   3 -22   4    3.72    0.83
  -3 -22  -4    4.38    0.93
  -3  22  -4    3.39    0.65
   3  22   4    2.87    0.51
  -4 -22  -4    1.55    0.74
   4 -22   4    0.40    0.61
   4  22   4    0.13    0.32
  -4  22  -4    0.14    0.53
   5 -22   4    4.09    0.88
  -5 -22  -4    6.82    1.18
  -5  22  -4    3.40    0.74
  -6 -22  -4    2.34    0.84
  -6  22  -4    1.24    0.74
  -7  22  -4    0.35    0.69
   9 -23  -4    1.80    0.87
  -9 -23   4    0.63    1.25
   9  23  -4    2.18    0.70
  -9  23   4   -0.11    0.67
   8 -23  -4   -1.25    0.59
  -8 -23   4    0.81    1.06
  -8  23   4    0.05    0.61
   8  23  -4    0.67    0.55
   7 -23  -4    0.45    0.58
  -7 -23   4    0.68    1.04
   7  23  -4    0.33    0.51
  -7  23   4   -0.42    0.54
  -6 -23   4    1.85    1.08
   6 -23  -4    2.11    0.69
   6  23  -4    1.94    0.56
  -6  23   4    0.79    0.58
   5 -23  -4    3.24    0.71
  -5 -23   4    1.78    1.17
   5  23  -4    1.64    0.48
  -5  23   4    2.23    0.64
  -4 -23   4    9.51    1.43
   4 -23  -4    7.73    0.86
   4  23  -4    7.80    0.78
  -4  23   4    7.47    0.83
  -3 -23   4    4.09    1.14
   3 -23  -4    2.45    0.52
   3  23  -4    2.56    0.50
  -3  23   4    2.45    0.54
  -2 -23   4    1.33    0.94
   2 -23  -4    1.03    0.53
   2 -23  -4    0.35    0.41
  -2  23   4    0.29    0.39
   2  23  -4    0.74    0.38
  -1 -23   4    3.06    1.04
   1 -23  -4    1.71    0.48
   1 -23  -4    2.36    0.58
   1  23  -4    1.74    0.42
  -1  23   4    1.41    0.43
   0 -23   4    0.29    0.73
   0 -23  -4    0.12    0.38
   0 -23  -4    0.39    0.52
   0  23  -4   -0.16    0.25
   0  23   4    0.43    0.39
   0  23  -4   -0.54    0.30
  -1 -23  -4   -0.17    0.56
  -1 -23  -4   -0.28    0.35
   1 -23   4    0.00    0.64
  -1  23  -4    0.23    0.33
  -1  23  -4    0.11    0.31
   1  23   4   -0.01    0.35
  -2 -23  -4    1.26    0.60
   2 -23   4    0.60    0.63
  -2  23  -4    0.30    0.40
   2  23   4    0.43    0.36
  -2  23  -4    0.41    0.33
  -3 -23  -4    0.88    0.70
   3 -23   4   -0.55    0.53
   3  23   4   -0.23    0.32
  -3  23  -4    0.28    0.46
   4 -23   4    0.97    0.68
  -4 -23  -4    1.93    0.80
   4  23   4    1.57    0.45
  -4  23  -4    1.79    0.64
   5 -23   4    6.06    1.02
  -5 -23  -4    7.53    1.23
  -5  23  -4    4.16    0.85
  -6 -23  -4    3.64    0.99
  -6  23  -4    1.18    0.70
  -7 -23  -4    2.80    1.10
  -7  23  -4    2.98    1.28
  -9 -24   4   -0.42    1.21
   9 -24  -4    0.68    0.87
   9  24  -4    1.54    0.66
  -9  24   4    0.02    0.67
  -8 -24   4    1.15    1.25
   8 -24  -4    1.44    0.81
   8  24  -4    1.93    0.66
  -8  24   4    0.68    0.67
   7 -24  -4    1.19    0.66
  -7 -24   4    1.70    1.16
  -7  24   4   -0.07    0.59
   7  24  -4    1.77    0.60
   6 -24  -4    1.21    0.62
  -6 -24   4    1.97    1.24
  -6  24   4    1.61    0.64
   6  24  -4    1.05    0.55
  -5 -24   4    0.96    1.04
   5 -24  -4    0.38    0.55
  -5  24   4   -0.26    0.52
   5  24  -4    0.51    0.40
   4 -24  -4    0.84    0.54
  -4 -24   4    0.08    0.98
   4  24  -4    0.78    0.45
  -4  24   4    1.04    0.58
  -3 -24   4    1.60    1.04
   3 -24  -4    0.90    0.53
   3  24  -4    1.02    0.42
  -3  24   4    1.09    0.48
   2 -24  -4   -0.16    0.42
  -2 -24   4   -0.67    0.96
  -2  24   4   -0.20    0.43
   2  24  -4    0.17    0.35
  -1 -24   4    6.43    1.15
   1 -24  -4    6.79    0.85
   1 -24  -4    5.38    0.61
  -1  24   4    5.82    0.69
   1  24  -4    4.89    0.58
   0 -24  -4    0.31    0.40
   0 -24  -4    0.49    0.57
   0 -24   4   -0.48    0.70
   0  24   4   -0.36    0.38
   0  24  -4    0.11    0.27
   0  24  -4    0.03    0.34
  -1 -24  -4   -0.02    0.48
   1 -24   4    0.32    0.73
  -1 -24  -4   -0.27    0.36
  -1  24  -4    0.31    0.34
   1  24   4    0.06    0.37
  -1  24  -4    0.03    0.33
   2 -24   4    0.20    0.65
  -2 -24  -4    0.22    0.63
  -2  24  -4    1.25    0.46
  -2  24  -4    0.55    0.35
   2  24   4    0.17    0.36
   3 -24   4   -0.23    0.49
  -3 -24  -4    0.57    0.60
   3  24   4    0.29    0.35
  -3  24  -4    0.09    0.43
  -4 -24  -4    2.28    0.82
   4 -24   4    1.76    0.76
   4  24   4    1.74    0.47
  -4  24  -4    2.45    0.65
   5 -24   4   -0.13    0.60
  -5 -24  -4    1.91    0.82
  -5  24  -4    1.34    0.69
  -6 -24  -4   12.68    1.60
  -6  24  -4   12.52    1.29
  -9 -25   4   -1.49    1.06
   9  25  -4    1.34    1.06
  -9  25   4    0.04    0.67
  -8 -25   4    1.42    1.34
   8 -25  -4    1.58    0.82
  -8  25   4   -0.15    0.63
   8  25  -4    0.97    0.57
   7 -25  -4   11.32    1.17
  -7 -25   4   11.55    1.81
  -7  25   4    9.37    1.02
   7  25  -4    9.07    0.97
  -6 -25   4    6.72    1.42
   6 -25  -4    6.60    0.97
   6  25  -4    4.78    0.76
  -6  25   4    4.96    0.83
  -5 -25   4    0.89    1.07
   5 -25  -4    0.90    0.60
   5  25  -4    0.94    0.49
  -5  25   4    0.50    0.55
   4 -25  -4   -0.67    0.46
  -4 -25   4   -0.30    0.97
  -4  25   4   -1.26    0.46
   4  25  -4    0.37    0.42
  -3 -25   4   -0.13    0.96
   3 -25  -4    1.32    0.53
  -3  25   4    0.97    0.52
   3  25  -4    0.44    0.41
   2 -25  -4    2.34    0.53
  -2 -25   4    3.10    1.04
   2  25  -4    3.33    0.51
  -2  25   4    2.07    0.53
  -1 -25   4    4.41    1.06
   1 -25  -4    4.33    0.59
   1 -25  -4    5.52    0.75
  -1  25   4    3.90    0.63
   1  25  -4    3.58    0.52
   0 -25   4    8.26    1.17
   0 -25  -4    8.40    0.71
   0 -25  -4   10.67    1.04
   0  25   4    8.67    0.84
   0  25  -4    9.64    0.62
   0  25  -4    8.05    0.69
   1 -25   4   -0.33    0.61
  -1 -25  -4    0.22    0.37
  -1 -25  -4    0.80    0.64
   1  25   4    0.11    0.37
  -1  25  -4    0.51    0.34
  -1  25  -4   -0.35    0.31
   2 -25   4    0.25    0.58
  -2 -25  -4    0.00    0.55
  -2  25  -4   -0.39    0.32
  -2  25  -4    0.05    0.39
   2  25   4    0.28    0.39
  -3 -25  -4    1.00    0.64
   3 -25   4    0.67    0.64
   3  25   4    0.45    0.39
  -3  25  -4    1.10    0.52
   4 -25   4    1.31    0.72
  -4 -25  -4    2.55    0.83
  -4  25  -4    1.56    0.65
   4  25   4    1.40    0.46
   5 -25   4   -0.61    0.96
  -5 -25  -4    2.69    0.99
  -5  25  -4    1.00    0.64
  -6 -25  -4    2.46    0.83
  -6  25  -4    0.69    0.68
   8 -26  -4    0.51    0.73
  -8 -26   4    0.59    1.16
   8  26  -4    0.44    0.53
  -8  26   4   -0.22    0.62
  -7 -26   4   -0.43    1.11
   7 -26  -4   -0.15    0.60
   7  26  -4    0.76    0.55
  -7  26   4    0.61    0.63
   6 -26  -4    0.64    0.66
  -6 -26   4    0.98    1.18
  -6  26   4   -0.59    0.54
   6  26  -4    0.34    0.43
  -5 -26   4    4.37    1.41
   5 -26  -4    4.29    0.74
  -5  26   4    3.61    0.73
   5  26  -4    4.78    0.74
   4 -26  -4    1.72    0.58
  -4 -26   4    2.93    1.18
   4  26  -4    2.77    0.56
  -4  26   4    3.01    0.68
  -3 -26   4    1.58    1.06
   3 -26  -4    0.46    0.48
  -3  26   4    0.76    0.55
   3  26  -4    1.48    0.48
  -2 -26   4    5.93    1.19
   2 -26  -4    5.85    0.68
  -2  26   4    5.35    0.74
   2  26  -4    4.79    0.62
  -1 -26   4    0.29    0.84
   1 -26  -4    0.76    0.55
   1 -26  -4   -0.49    0.37
   1  26  -4   -0.18    0.36
  -1  26   4   -0.10    0.44
   0 -26   4    1.51    0.86
   0 -26  -4    2.01    0.47
   0 -26  -4    3.18    0.74
   0  26  -4    1.18    0.41
   0  26   4    2.15    0.53
  -1 -26  -4    2.00    0.71
   1 -26   4    2.10    0.80
   1  26   4    2.42    0.52
  -1  26  -4    2.66    0.49
  -1  26  -4    1.99    0.46
  -2 -26  -4   -0.06    0.55
   2 -26   4    0.13    0.65
  -2  26  -4   -0.18    0.33
  -2  26  -4    0.04    0.39
   2  26   4    0.28    0.38
   3 -26   4   -0.25    0.60
  -3 -26  -4    0.18    0.63
   3  26   4   -0.01    0.37
  -3  26  -4    0.36    0.49
  -4 -26  -4    2.31    0.89
   4 -26   4    0.69    0.67
   4  26   4    1.00    0.44
  -4  26  -4    0.73    0.55
  -5 -26  -4    1.86    0.83
  -5  26  -4    0.74    0.63
  -6 -26  -4    3.32    0.96
  -6  26  -4    1.80    0.73
  -8 -27   4    1.00    1.41
   8 -27  -4    1.31    0.78
   8  27  -4    1.13    0.63
  -8  27   4    0.86    0.70
  -7 -27   4    1.44    1.26
   7 -27  -4    0.67    0.71
  -7  27   4    0.19    0.61
   7  27  -4    0.14    0.53
   6 -27  -4   -0.15    0.54
  -6 -27   4    1.32    1.38
  -6  27   4    0.20    0.61
   6  27  -4   -0.30    0.45
  -5 -27   4    4.89    1.46
   5 -27  -4    4.17    0.81
  -5  27   4    3.05    0.75
   5  27  -4    4.15    0.66
  -4 -27   4   10.45    1.73
   4 -27  -4   10.16    0.97
   4  27  -4   12.05    0.94
  -4  27   4    9.96    1.00
  -3 -27   4   -0.97    0.97
   3 -27  -4    0.02    0.47
  -3  27   4    0.06    0.45
   3  27  -4    0.12    0.40
   2 -27  -4   -0.24    0.40
  -2 -27   4    0.80    0.98
  -2  27   4    0.07    0.43
   2  27  -4   -0.05    0.38
  -1 -27   4    2.09    0.97
   1 -27  -4    2.70    0.65
   1 -27  -4    2.74    0.53
  -1  27   4    1.96    0.58
   1  27  -4    3.09    0.52
   0 -27   4   11.61    1.50
   0 -27  -4   10.39    0.76
   0  27  -4   11.01    0.80
   0  27   4   11.40    0.94
  -1 -27  -4    1.62    0.73
   1 -27   4    0.51    0.71
   1  27   4    1.66    0.51
  -1  27  -4    1.60    0.41
  -1  27  -4    1.40    0.43
   2 -27   4   -0.08    0.69
  -2 -27  -4    1.79    0.78
  -2  27  -4    0.81    0.46
   2  27   4    0.38    0.42
  -2  27  -4    0.32    0.39
  -3 -27  -4    1.51    0.73
   3 -27   4    0.11    0.65
   3  27   4   -0.10    0.37
  -3  27  -4    0.09    0.46
  -4 -27  -4    2.31    0.87
   4 -27   4    0.55    0.69
  -4  27  -4    1.69    0.65
   4  27   4    0.93    0.45
  -5 -27  -4    5.46    1.13
  -5  27  -4    3.36    0.80
  -6  27  -4    1.13    0.70
  -8 -28   4    4.21    1.62
   8 -28  -4    4.77    1.05
  -8  28   4    3.14    0.86
   8  28  -4    5.79    0.91
   7 -28  -4    2.78    0.87
  -7 -28   4    2.86    1.59
  -7  28   4    1.63    0.75
   7  28  -4    2.86    0.69
   6 -28  -4    1.29    0.73
  -6 -28   4    2.25    1.31
   6  28  -4    1.03    0.59
  -6  28   4    1.26    0.65
   5 -28  -4    3.22    0.78
  -5 -28   4    4.11    1.40
  -5  28   4    4.19    0.81
   5  28  -4    4.11    0.73
   4 -28  -4    0.88    0.55
  -4 -28   4   -0.12    1.13
  -4  28   4    0.42    0.56
   4  28  -4   -0.10    0.43
  -3 -28   4    0.02    1.04
   3 -28  -4    0.16    0.45
   3  28  -4   -0.55    0.39
  -3  28   4   -0.66    0.45
  -2 -28   4   -0.95    0.91
   2 -28  -4    0.00    0.43
  -2  28   4    0.00    0.49
   2  28  -4    0.02    0.39
   1 -28  -4   10.53    1.04
  -1 -28   4    9.49    1.35
   1 -28  -4    6.69    0.72
  -1  28   4    9.13    0.91
   1  28  -4   10.13    0.83
   0 -28   4    7.32    1.18
   0 -28  -4   10.52    1.09
   0  28   4    8.34    0.85
   0  28  -4    9.88    0.81
  -1 -28  -4    1.88    0.75
   1 -28   4    0.81    0.77
  -1  28  -4    0.66    0.36
   1  28   4    0.71    0.47
  -1  28  -4    1.22    0.44
  -2 -28  -4    0.95    0.73
   2 -28   4   -1.08    0.63
  -2  28  -4   -0.30    0.36
  -2  28  -4    0.74    0.42
   2  28   4   -0.35    0.37
  -3 -28  -4    3.17    0.87
   3 -28   4    1.86    0.77
  -3  28  -4    3.43    0.67
   3  28   4    2.66    0.58
   4 -28   4    0.23    0.65
  -4 -28  -4    0.85    0.83
   4  28   4    0.65    0.45
  -4  28  -4    0.78    0.58
  -5 -28  -4    1.81    0.86
  -5  28  -4    1.16    0.65
  -6 -28  -4    6.00    1.23
  -6  28  -4    2.38    0.75
  -8 -29   4   -0.02    1.32
   8 -29  -4   -0.29    0.71
  -8  29   4   -0.81    0.63
   8  29  -4    0.52    0.59
  -7 -29   4    4.47    1.51
   7 -29  -4    3.38    0.88
  -7  29   4    3.52    0.83
   7  29  -4    4.08    0.79
   6 -29  -4    2.93    0.74
  -6 -29   4    2.09    1.50
  -6  29   4    1.48    0.71
   6  29  -4    2.17    0.63
   5 -29  -4    0.71    0.58
  -5 -29   4    0.02    1.32
  -5  29   4   -0.07    0.62
   5  29  -4   -0.08    0.46
  -4 -29   4    2.02    1.28
   4 -29  -4    2.13    0.65
   4  29  -4    2.38    0.57
  -4  29   4    2.38    0.70
   3 -29  -4    0.43    0.51
  -3 -29   4    0.95    1.22
   3  29  -4    1.10    0.49
  -3  29   4    0.63    0.55
  -2 -29   4    1.36    1.23
   2 -29  -4    1.24    0.51
   2  29  -4    1.10    0.47
  -2  29   4    0.58    0.55
   1 -29  -4    6.78    0.69
  -1 -29   4    7.75    1.42
  -1  29   4    7.33    0.86
   1  29  -4    6.40    0.72
   0 -29   4    4.40    1.06
   0 -29  -4    5.10    0.86
   0  29  -4    3.61    0.58
   0  29   4    3.17    0.60
  -1 -29  -4   18.22    1.48
   1 -29   4   16.35    1.58
  -1  29  -4   17.13    1.01
   1  29   4   15.60    1.08
  -2 -29  -4    1.01    0.73
   2 -29   4   -0.21    0.68
  -2  29  -4    0.35    0.40
  -2  29  -4    0.38    0.44
   2  29   4    0.35    0.47
  -3 -29  -4    4.68    0.99
   3 -29   4    4.42    0.96
  -3  29  -4    3.15    0.66
   3  29   4    3.59    0.64
   4 -29   4   -0.46    0.65
  -4 -29  -4    1.63    0.80
  -4  29  -4    1.54    0.64
   4  29   4    0.57    0.45
  -5 -29  -4    2.42    0.88
  -5  29  -4    0.69    0.64
  -6  29  -4    1.26    0.77
  -8  30   4    0.06    0.70
  -7 -30   4    6.21    1.82
   7 -30  -4    4.27    0.95
  -7  30   4    3.47    0.86
   7  30  -4    3.55    0.75
   6 -30  -4   -0.59    0.60
  -6 -30   4    1.23    1.35
   6  30  -4    0.48    0.50
  -6  30   4    0.09    0.67
  -5 -30   4    0.39    1.26
   5 -30  -4    0.23    0.58
  -5  30   4    1.11    0.66
   5  30  -4    0.41    0.53
  -4 -30   4    1.20    1.29
   4 -30  -4    2.57    0.67
  -4  30   4    2.22    0.69
   4  30  -4    0.94    0.46
   3 -30  -4    0.71    0.49
  -3 -30   4    1.66    1.32
   3  30  -4    0.63    0.47
  -3  30   4    0.10    0.56
   2 -30  -4    0.05    0.43
  -2 -30   4    0.20    1.17
   2  30  -4    0.16    0.40
  -2  30   4   -0.26    0.43
   1 -30  -4   15.41    0.92
  -1 -30   4   14.03    1.84
   1  30  -4   15.49    0.98
  -1  30   4   15.42    1.14
   0 -30  -4    2.01    0.73
   0 -30   4   -0.05    0.93
   0  30   4    1.37    0.55
   0  30  -4    1.14    0.49
   1 -30   4   16.18    1.61
  -1 -30  -4   19.87    1.49
   1  30   4   19.22    1.17
  -1  30  -4   18.24    1.05
   2 -30   4    1.85    0.86
  -2 -30  -4    3.28    0.90
  -2  30  -4    1.51    0.49
   2  30   4    2.00    0.58
  -2  30  -4    1.95    0.53
   3 -30   4   -0.76    0.60
  -3 -30  -4    2.32    0.87
   3  30   4    0.53    0.48
  -3  30  -4    1.01    0.52
  -4 -30  -4    4.33    1.04
   4  30   4    3.63    0.65
  -4  30  -4    4.57    0.82
  -5 -30  -4    3.52    1.04
  -5  30  -4    1.02    0.61
  -7 -31   4    0.65    1.40
   7 -31  -4    1.94    0.84
  -7  31   4    4.43    0.93
   6 -31  -4   -0.35    0.59
  -6 -31   4    0.89    1.55
  -6  31   4   -0.84    0.61
   6  31  -4   -0.20    0.50
   5 -31  -4    0.09    0.63
  -5 -31   4   -0.98    1.24
  -5  31   4   -0.58    0.57
   5  31  -4    0.08    0.52
   4 -31  -4   -0.53    0.49
  -4 -31   4    1.40    1.43
   4  31  -4   -0.16    0.43
  -4  31   4    0.18    0.59
   3 -31  -4    0.47    0.51
  -3 -31   4   -0.38    1.12
  -3  31   4   -0.16    0.54
   3  31  -4    0.06    0.46
  -2 -31   4    5.67    1.50
   2 -31  -4    4.44    0.68
   2  31  -4    3.83    0.65
  -2  31   4    3.19    0.70
  -1 -31   4    0.50    1.00
  -1  31   4    1.26    0.62
   1  31  -4    1.25    0.50
   0 -31   4   12.14    1.54
   0 -31  -4   14.45    1.31
   0  31  -4   13.86    0.97
   0  31   4   14.75    1.11
   1 -31   4   -1.18    0.77
  -1 -31  -4    1.45    0.77
   1  31   4    0.30    0.47
  -1  31  -4   -0.66    0.38
   2 -31   4   -1.04    0.66
  -2 -31  -4    1.73    0.81
  -2  31  -4   -0.14    0.65
   2  31   4    0.47    0.48
  -3 -31  -4    2.93    0.93
   3 -31   4    1.46    0.81
   3  31   4    1.79    0.55
  -3  31  -4    2.45    0.62
  -4 -31  -4    1.45    0.88
   4  31   4   -0.02    0.44
  -4  31  -4   -0.35    0.47
  -5 -31  -4    1.90    0.85
  -5  31  -4    0.33    0.56
  -7 -32   4   -0.38    1.59
   7 -32  -4    0.59    0.70
   7  32  -4    0.15    0.55
  -7  32   4   -0.11    0.64
  -6 -32   4    2.11    1.47
   6 -32  -4    0.13    0.68
   6  32  -4    0.53    0.55
  -6  32   4    0.76    0.69
  -5 -32   4    1.35    1.58
   5 -32  -4   -0.05    0.61
  -5  32   4    1.23    0.75
   5  32  -4    0.52    0.56
  -4 -32   4   -0.26    1.23
   4 -32  -4   -0.42    0.52
   4  32  -4    0.01    0.47
  -4  32   4    0.18    0.61
   3 -32  -4   -0.23    0.49
  -3 -32   4   -0.31    1.16
  -3  32   4    0.18    0.60
   3  32  -4    0.27    0.48
   2 -32  -4    1.12    0.49
  -2 -32   4    0.26    1.24
   2  32  -4    1.51    0.54
  -2  32   4    1.06    0.60
  -1 -32   4   -0.48    0.97
  -1  32   4    1.46    0.62
   1  32  -4    1.56    0.52
   0 -32  -4    1.18    0.76
   0 -32   4   -0.36    0.84
   0  32   4    0.66    0.54
   0  32  -4    0.56    0.46
   1 -32   4   -0.88    0.85
  -1 -32  -4    0.68    0.76
   1  32   4    0.10    0.49
  -1  32  -4    0.77    0.47
   2 -32   4   -1.31    0.67
  -2 -32  -4    1.56    0.84
   2  32   4   -0.10    0.45
  -3 -32  -4    3.57    1.01
   3 -32   4    1.67    0.84
   3  32   4    1.36    0.54
  -3  32  -4    1.67    0.57
  -4 -32  -4    1.98    0.91
   4  32   4    0.95    0.51
  -4  32  -4    1.60    0.63
  -5  32  -4    1.31    0.63
   7 -33  -4    1.07    0.75
   7  33  -4    2.86    0.91
  -7  33   4    0.60    0.74
   6 -33  -4    0.73    0.68
  -6 -33   4    0.15    1.64
   6  33  -4    1.26    0.60
  -6  33   4    1.15    0.71
   5 -33  -4    0.94    0.66
  -5 -33   4   -0.71    1.34
  -5  33   4    0.67    0.68
   5  33  -4   -0.30    0.51
  -4 -33   4    0.86    1.48
   4 -33  -4    0.93    0.61
   4  33  -4    0.16    0.43
  -4  33   4    1.20    0.67
  -3 -33   4   -0.68    1.27
   3 -33  -4    0.25    0.49
   3  33  -4   -0.01    0.46
  -3  33   4    0.64    0.55
  -2 -33   4    1.67    1.16
   2  33  -4    2.60    0.59
  -2  33   4    3.27    0.74
  -1 -33   4   -0.63    0.97
   1  33  -4    0.30    0.48
  -1  33   4    0.47    0.60
   0 -33   4   11.52    1.57
   0  33  -4   11.64    0.94
   0  33   4   11.10    1.10
   1 -33   4    0.78    1.00
  -1 -33  -4    4.51    0.98
   1  33   4    2.70    0.70
  -1  33  -4    3.07    0.61
  -2 -33  -4    3.97    1.01
   2 -33   4    1.65    0.81
   2  33   4    3.34    0.71
  -3 -33  -4    4.22    1.13
   3  33   4    2.91    0.64
  -4 -33  -4    1.56    0.82
   4  33   4    0.17    0.44
  -4  33  -4    1.94    0.64
  -6 -34   4   -1.62    1.37
   6 -34  -4   -0.03    0.59
   6  34  -4   -0.06    0.50
  -6  34   4   -0.15    0.69
  -5 -34   4    1.03    1.64
   5 -34  -4   -0.11    0.60
  -5  34   4    0.60    0.69
   5  34  -4   -0.25    0.50
  -4 -34   4    0.43    1.31
   4 -34  -4   -0.80    0.52
  -4  34   4    0.53    0.65
   4  34  -4    0.55    0.50
   3 -34  -4    1.46    0.61
  -3 -34   4    2.70    1.48
  -3  34   4    1.01    0.67
   3  34  -4    1.89    0.57
  -2 -34   4   -1.04    1.01
  -2  34   4   -0.08    0.58
   2  34  -4    0.18    0.47
  -1 -34   4   -0.95    0.98
   1  34  -4    0.48    0.50
  -1  34   4    0.01    0.54
   0 -34   4    0.55    1.06
   0  34  -4    1.56    0.55
   0  34   4    1.31    0.55
   1 -34   4    1.19    1.05
  -1 -34  -4    4.36    1.01
   1  34   4    4.13    0.75
  -1  34  -4    3.96    0.67
   2 -34   4   -0.20    0.80
  -2 -34  -4    1.48    0.86
   2  34   4   -0.51    0.48
  -3 -34  -4    0.93    0.83
   3  34   4    0.00    0.49
  -4 -34  -4    6.02    1.21
   4  34   4    3.99    0.71
   6 -35  -4   -0.27    0.72
  -6 -35   4   -1.45    1.69
  -6  35   4    0.03    0.65
   6  35  -4    0.23    0.50
  -5 -35   4   -1.58    1.36
   5 -35  -4    0.44    0.64
   5  35  -4    0.04    0.52
  -5  35   4   -0.37    0.67
  -4 -35   4    0.62    1.37
   4  35  -4    1.62    0.60
  -4  35   4    1.73    0.77
  -3 -35   4    0.48    1.30
   3  35  -4   -0.20    0.46
  -3  35   4   -0.01    0.61
  -2 -35   4   -0.96    1.06
   2  35  -4   -0.44    0.44
  -2  35   4   -0.28    0.62
  -1 -35   4   -1.71    0.93
   1  35  -4    0.05    0.49
  -1  35   4    0.25    0.57
   0 -35   4   -0.82    1.06
   0  35  -4    0.29    0.48
   0  35   4    0.41    0.57
   1 -35   4    7.19    1.26
  -1 -35  -4    9.17    1.28
   1  35   4    7.35    0.97
  -1  35  -4    7.91    0.86
  -2 -35  -4    1.08    0.87
   2 -35   4   -1.01    0.72
   2  35   4    0.59    0.57
  -3 -35  -4    3.58    1.02
   3  35   4    2.06    0.62
  -4 -35  -4    1.50    0.92
   4  35   4    0.84    0.51
   6 -36  -4    2.45    0.79
  -6  36   4    0.37    0.81
   5 -36  -4    1.50    0.71
  -5 -36   4    0.51    1.66
   5  36  -4    1.50    0.62
  -5  36   4    0.30    0.70
  -4 -36   4   -0.76    1.53
   4 -36  -4   -0.37    0.52
  -4  36   4   -1.15    0.57
   4  36  -4    0.39    0.50
  -3 -36   4   -0.53    1.42
   3  36  -4    0.41    0.51
  -3  36   4   -0.43    0.58
  -2 -36   4   -0.64    1.29
   2  36  -4    0.41    0.49
  -2  36   4    0.33    0.64
  -1 -36   4   -0.65    1.02
   1  36  -4   -0.07    0.48
  -1  36   4   -0.56    0.50
   0 -36   4   -0.80    1.06
   0  36   4    0.70    0.59
   0  36  -4   -0.09    0.48
   1 -36   4   -1.26    0.86
   1  36   4    0.26    0.55
  -1  36  -4   -0.25    0.50
   2 -36   4   -0.79    0.81
  -2 -36  -4    1.84    0.93
   2  36   4    0.60    0.58
  -3 -36  -4    2.47    0.96
   3  36   4    1.74    0.63
   5 -37  -4   -0.66    0.56
  -5 -37   4   -1.77    1.40
  -5  37   4   -0.89    0.64
   5  37  -4   -0.23    0.49
  -4 -37   4    0.26    1.47
  -4  37   4    0.12    0.64
   4  37  -4    1.22    0.56
  -3 -37   4   -1.06    1.50
   3  37  -4    1.12    0.57
  -3  37   4    1.00    0.68
  -2 -37   4    1.56    1.47
  -2  37   4    3.03    0.77
   2  37  -4    4.34    0.76
  -1 -37   4   -1.09    1.16
  -1  37   4    0.23    0.61
   1  37  -4   -0.11    0.49
   0 -37   4   -0.87    1.04
   0  37  -4    0.81    0.53
   0  37   4   -0.04    0.56
   1 -37   4   -0.42    0.95
   1  37   4   -0.06    0.55
  -2 -37  -4    1.49    1.01
   2  37   4    2.05    0.69
  -3 -37  -4    4.95    1.20
   3  37   4    3.04    0.73
  -5  38   4    0.17    1.19
  -4 -38   4   -1.98    1.54
   4  38  -4   -0.05    0.49
  -4  38   4   -0.01    0.69
  -3 -38   4   -2.84    1.25
   3  38  -4    0.40    0.50
  -3  38   4   -0.33    0.63
  -2 -38   4    1.57    1.33
   2  38  -4    2.55    0.65
  -2  38   4    2.70    0.77
  -1 -38   4   -2.35    1.15
   1  38  -4    0.69    0.55
  -1  38   4    0.86    0.68
   0 -38   4   -1.60    1.02
   0  38  -4   -0.03    0.50
   0  38   4    0.22    0.60
   1 -38   4   -1.52    0.90
   1  38   4   -0.16    0.52
  -1  38  -4    0.10    0.54
  -2 -38  -4   -0.59    1.04
   2  38   4    0.50    0.59
  -3 -38  -4    0.27    0.99
   3  38   4   -0.44    0.52
  -4  39   4   -1.20    0.62
   4  39  -4    0.49    0.54
  -3 -39   4   -3.82    1.41
   3  39  -4    0.01    0.53
  -3  39   4   -0.38    0.66
  -2 -39   4   -1.69    1.38
  -2  39   4    0.90    0.67
   2  39  -4    1.08    0.59
  -1 -39   4   -2.18    1.22
   1  39  -4    1.86    0.62
  -1  39   4    0.34    0.64
   0 -39   4   -1.02    1.13
   0  39  -4    1.41    0.58
   0  39   4    0.02    0.61
   1  39   4   -0.04    0.61
  -1  39  -4   -0.15    0.66
   2  39   4   -0.34    0.56
  -3  40   4    0.35    0.68
   3  40  -4    0.45    0.53
  -2 -40   4   -3.52    1.31
  -2  40   4   -0.05    0.61
   2  40  -4    1.01    0.58
  -1 -40   4   -0.97    1.14
   1  40  -4    2.70    0.68
  -1  40   4    4.39    0.96
   0 -40   4   -2.59    1.02
   0  40   4    1.08    0.71
   0  40  -4   -0.18    0.55
   1 -40   4   -2.21    0.96
   1  40   4    0.27    0.64
  -2  41   4   -0.38    0.75
   2  41  -4    0.16    0.52
  -1  41   4    0.71    0.67
   1  41  -4    0.29    0.58
   0 -41   4   -2.08    1.05
   0  41   4    0.56    0.72
   0  41  -4    0.92    0.68
   9   0  -5   -0.69    0.42
   8   0  -5   -0.22    0.41
   7   0  -5   -0.05    0.42
   7   0  -5   -0.27    0.39
   6   0  -5    0.44    0.38
  -6   0   5    0.12    0.54
   6   0  -5    0.02    0.41
   5   0  -5    0.02    0.35
  -5   0   5   -0.19    0.50
   5   0  -5   -0.44    0.36
   4   0  -5    0.20    0.32
   4   0  -5   -0.07    0.32
  -4   0   5    0.21    0.44
  -3   0   5    0.40    0.39
   3   0  -5    0.02    0.26
   3   0  -5   -0.16    0.34
   2   0  -5   -0.02    0.35
  -2   0   5    0.24    0.35
   1   0  -5   -0.25    0.32
  -1   0   5    0.12    0.31
   0   0   5   -0.30    0.34
   0   0  -5   -0.25    0.30
  -1   0  -5    1.02    0.37
   1   0   5    1.43    0.48
  -2   0  -5   -0.33    0.38
   2   0   5   -0.01    0.42
  -3   0  -5   -0.52    0.39
   3   0   5   -0.46    0.45
  -4   0  -5    0.19    0.47
   4   0   5    0.81    0.62
   5   0   5    0.27    0.56
  -5   0  -5    0.62    0.47
   6   0   5    0.38    0.69
  -6   0  -5    0.67    0.53
   7   0   5    0.61    0.72
  -7   0  -5    1.29    0.62
   8   0   5    1.21    0.82
  -8   0  -5    0.60    0.59
   9  -1  -5    1.97    0.59
   9   1  -5    1.44    0.56
   8  -1  -5    0.79    0.49
   8   1  -5    0.87    0.47
   7  -1  -5    1.81    0.52
   7   1  -5    2.10    0.55
   7   1  -5    1.39    0.50
   6  -1  -5    1.24    0.41
  -6  -1   5    1.43    0.62
   6  -1  -5    1.82    0.53
   6   1  -5    0.78    0.44
  -6   1   5    1.66    0.57
   6   1  -5    1.36    0.46
  -5  -1   5    0.15    0.54
   5  -1  -5    0.10    0.35
   5  -1  -5    0.13    0.40
   5   1  -5    0.84    0.35
   5   1  -5   -0.02    0.36
  -5   1   5    0.18    0.46
  -4  -1   5    0.28    0.45
   4  -1  -5    0.42    0.33
   4  -1  -5    0.49    0.40
   4   1  -5    0.99    0.38
  -4   1   5   -0.11    0.39
   4   1  -5    0.65    0.33
  -3  -1   5    7.76    0.69
   3  -1  -5    8.44    0.61
   3   1  -5    9.07    0.63
  -3   1   5    7.52    0.62
   3   1  -5    8.07    0.51
   2  -1  -5   15.05    0.73
  -2  -1   5   14.75    0.82
   2   1  -5   15.42    0.77
   2   1  -5   15.14    0.59
  -2   1   5   14.24    0.75
   1  -1  -5    7.61    0.65
  -1  -1   5    8.54    0.67
   1   1  -5    7.64    0.60
  -1   1   5    8.71    0.71
   0  -1  -5    1.64    0.40
   0  -1   5    2.32    0.48
   0   1  -5    1.95    0.44
   0   1   5    2.13    0.46
   1  -1   5   92.79    2.51
   1   1   5   92.14    2.49
  -1   1  -5   89.63    2.01
   2  -1   5    1.61    0.57
  -2  -1  -5    2.19    0.47
  -2   1  -5    1.81    0.47
   2   1   5    1.44    0.52
  -3  -1  -5   -0.40    0.38
   3  -1   5    0.39    0.51
   3   1   5   -0.32    0.51
  -3   1  -5    0.44    0.41
   4  -1   5    9.40    1.14
  -4  -1  -5    9.80    0.84
  -4   1  -5   10.80    0.96
   4   1   5   10.62    1.08
  -5  -1  -5    4.29    0.69
   5  -1   5    4.21    0.92
  -5   1  -5    5.28    0.77
   5   1   5    5.68    1.00
   6  -1   5    3.53    0.94
  -6  -1  -5    2.83    0.67
   6   1   5    4.31    1.02
  -6   1  -5    2.46    0.65
  -7  -1  -5    0.66    0.59
   7  -1   5    0.07    0.64
  -7   1  -5    0.69    0.63
   7   1   5   -0.34    0.74
  -8  -1  -5    3.97    0.78
   8  -1   5    3.87    1.04
  -8   1  -5    3.90    0.83
   8   1   5    3.19    1.01
  10  -2  -5    5.21    0.81
   9  -2  -5    6.30    0.81
   9   2  -5    6.15    0.77
   8  -2  -5    2.37    0.57
   8   2  -5    3.26    0.67
   8   2  -5    3.07    0.58
   7  -2  -5    5.05    0.67
  -7  -2   5    5.17    0.79
   7   2  -5    6.30    0.69
   7   2  -5    4.94    0.63
  -6  -2   5    1.86    0.68
   6  -2  -5    1.41    0.50
   6   2  -5    2.60    0.53
  -6   2   5    2.67    0.71
   6   2  -5    1.94    0.48
  -5  -2   5    2.48    0.66
   5  -2  -5    3.57    0.54
   5   2  -5    2.96    0.48
   5   2  -5    1.98    0.43
  -5   2   5    3.23    0.53
  -4  -2   5    8.77    0.83
   4  -2  -5   11.16    0.75
  -4   2   5    8.39    0.65
   4   2  -5    9.42    0.65
   4   2  -5    8.54    0.64
  -3  -2   5   30.56    1.17
   3  -2  -5   28.97    0.99
  -3   2   5   30.49    0.98
   3   2  -5   30.46    0.91
   3   2  -5   31.43    0.98
   2  -2  -5    0.23    0.35
  -2  -2   5    0.03    0.34
   2   2  -5    0.06    0.23
   2   2  -5    0.23    0.32
  -2   2   5    0.05    0.31
   1  -2  -5    0.97    0.35
  -1  -2   5    0.91    0.40
  -1   2   5    0.46    0.36
   1   2  -5    0.80    0.33
   1   2  -5    1.26    0.21
   0  -2  -5   10.30    0.71
   0  -2   5    9.69    0.79
   0   2  -5   10.54    0.70
   0   2   5   10.88    0.82
   0   2   5   10.37    0.37
  -1  -2  -5   23.59    0.97
   1  -2   5   21.84    1.12
  -1   2  -5   22.55    0.97
   1   2   5   22.01    1.17
   2  -2   5    6.63    0.81
  -2  -2  -5    7.16    0.69
  -2   2  -5    7.06    0.67
   2   2   5    6.79    0.83
   3  -2   5    0.54    0.49
  -3  -2  -5    1.04    0.49
  -3   2  -5    0.26    0.41
   3   2   5    0.13    0.49
  -4  -2  -5    5.14    0.73
   4  -2   5    4.89    0.82
   4   2   5    4.88    0.84
  -4   2  -5    4.58    0.73
   5  -2   5    8.85    1.17
  -5  -2  -5    9.05    0.95
   5   2   5    9.24    1.14
  -5   2  -5    9.77    0.94
  -6  -2  -5    6.78    0.88
   6  -2   5    7.77    1.16
  -6   2  -5    9.26    1.07
   6   2   5    6.40    1.11
   7  -2   5    2.18    0.87
  -7  -2  -5    2.20    0.67
  -7   2  -5    1.46    0.66
   7   2   5    1.80    0.93
  -8  -2  -5    1.88    0.62
   8  -2   5    0.64    0.71
  -8   2  -5    1.43    0.64
   8   2   5    0.18    0.80
  10  -3  -5    1.62    0.63
   9  -3  -5    0.77    0.55
   8  -3  -5    0.09    0.49
   8   3  -5    0.69    0.55
   8   3  -5    0.28    0.42
  -7  -3   5    1.73    0.64
   7  -3  -5    0.54    0.48
   7   3  -5    0.87    0.43
   7   3  -5    0.79    0.49
   6  -3  -5    4.68    0.65
  -6  -3   5    4.96    0.79
   6   3  -5    5.44    0.60
   6   3  -5    5.10    0.63
   5  -3  -5    0.20    0.36
  -5  -3   5   -0.26    0.58
   5   3  -5   -0.17    0.36
   5   3  -5   -0.24    0.33
  -5   3   5   -0.33    0.37
   4  -3  -5   45.36    1.30
  -4  -3   5   44.95    1.57
   4   3  -5   42.97    1.16
   4   3  -5   44.87    1.24
  -4   3   5   44.44    1.18
  -3  -3   5    1.28    0.51
   3  -3  -5    0.35    0.35
   3   3  -5    0.77    0.35
  -3   3   5    0.91    0.29
   3   3  -5    0.75    0.29
   2  -3  -5   12.56    0.78
  -2  -3   5   13.15    0.87
  -2   3   5   13.05    0.70
   2   3  -5   12.54    0.69
   2   3  -5   12.79    0.56
  -1  -3   5    1.05    0.42
   1  -3  -5    1.22    0.38
   1   3  -5    1.35    0.22
  -1   3   5    1.00    0.36
   1   3  -5    0.86    0.34
   0  -3   5    4.91    0.66
   0  -3  -5    4.17    0.51
   0   3   5    4.53    0.30
   0   3  -5    5.48    0.58
   0   3   5    4.63    0.60
  -1  -3  -5   17.74    0.85
   1  -3   5   19.03    1.06
   1   3   5   18.55    1.09
   1   3   5   19.17    0.41
  -1   3  -5   19.26    0.92
  -2  -3  -5    0.51    0.38
   2  -3   5    0.43    0.46
   2   3   5    0.85    0.50
  -2   3  -5    0.31    0.36
   3  -3   5    0.26    0.50
  -3  -3  -5    0.36    0.44
   3   3   5    0.32    0.52
  -3   3  -5    0.28    0.42
   4  -3   5    0.84    0.56
  -4  -3  -5    0.61    0.44
  -4   3  -5    1.89    0.59
   4   3   5    1.18    0.62
  -5  -3  -5   18.27    1.14
   5  -3   5   15.71    1.31
   5   3   5   18.99    1.54
  -5   3  -5   18.62    1.24
   6  -3   5    4.34    1.00
  -6  -3  -5    3.47    0.70
   6   3   5    4.55    0.97
  -6   3  -5    4.18    0.84
  -7  -3  -5    1.27    0.59
   7  -3   5    0.52    0.78
  -7   3  -5    1.47    0.73
   7   3   5    0.56    0.82
   8  -3   5    2.89    0.93
  -8  -3  -5    3.55    0.71
   8   3   5    1.84    0.93
  -8   3  -5    0.80    0.60
  10  -4  -5    1.80    0.67
   9  -4  -5   -0.26    0.48
   9   4  -5   -0.13    0.55
   8  -4  -5    3.01    0.67
   8   4  -5    2.15    0.64
   8   4  -5    2.39    0.53
  -7  -4   5    0.05    0.64
   7  -4  -5   -0.67    0.41
   7   4  -5   -0.39    0.42
   7   4  -5   -0.17    0.36
  -6  -4   5    3.42    0.75
   6  -4  -5    3.92    0.64
   6   4  -5    3.73    0.55
   6   4  -5    3.37    0.51
  -5  -4   5    0.12    0.61
   5  -4  -5    0.52    0.45
   5   4  -5    0.08    0.36
   5   4  -5    0.18    0.35
  -5   4   5   -0.45    0.32
   4  -4  -5   61.45    1.53
  -4  -4   5   59.71    1.85
   4   4  -5   60.65    1.40
[truncated: 357,167 more chars]
